# Supplementary material for: Atmospheric emissions of Ti-containing nanoparticles from industrial activities in China
Source: Royal Society of Chemistry journal article supplement (doi:10.1039/d4en00347k), 2024-01-01
Supplement: d4en00347k1.pdf [file d4en00347k1.pdf]

## Supplementary Information

### **Atmospheric emissions of Ti-containing nanoparticles from industrial activities in China**

Qiuting Yang,<sup>1,2</sup> Lili Yang,<sup>1,2</sup> Changzhi Chen,<sup>2,3</sup> Jianghui Yun,<sup>1,2</sup> Chenyan Zhao,<sup>2,3</sup>

Guorui Liu<sup>1,2,3,\*</sup>

<sup>1</sup>State Key Laboratory of Environmental Chemistry and Ecotoxicology, Research Center for Eco-Environmental Sciences, Chinese Academy of Sciences, P.O. Box 2871, Beijing, 100085, China

<sup>2</sup>University of Chinese Academy of Sciences, Beijing, 100049, China

<sup>3</sup>School of Environment, Hangzhou Institute for Advanced Study, UCAS, Hangzhou, 310024, China

\*Corresponding author: [grliu@rcees.ac.cn](mailto:grliu@rcees.ac.cn)

# Table of Contents

**Abbreviations** **Page 3**

## Supplementary Figures 1–3

**Fig. S1** Distribution map of sampling sites for 132 industrial particulate matter samples **Page 4**

**Fig. S2** The standard curves for Ti ions (a) and Au ions (b) **Page 5**

**Fig. S3** The particle size distribution of Ti-containing NPs from various industrial sources  
**Page 6**

## Supplementary Tables 1–8

**Table S1** Detailed information on particulate matter samples from 132 industrial activities  
**Page 7–11**

**Table S2** Parameters used for access the LADD<sub>inh</sub> **Page 12**

**Table S3** Particle number concentrations (particles/g) of Ti-containing NPs emitted by 132 actual industrial process from thirteen industrial sectors **Page 21**

**Table S4** The mass (g) of each single Ti-containing particle is determined by 132 actual industrial process from thirteen industrial sectors. **Single Excel**

**Table S5** The particle size distribution of Ti-containing NPs (calculated as anatase-TiO<sub>2</sub>) determined by 132 actual industrial process from thirteen industrial sectors. **Page 22–24**

**Table S6** The particle size distribution of Ti-containing NPs (calculated as rutile-TiO<sub>2</sub>) determined by 132 actual industrial process from thirteen industrial sectors. **Page 25–27**

**Table S7.** Emission factors (particles/t-product or particles/t-disposal) of Ti-containing NPs for various industry sectors **Page 28**

**Table S8** Atmosphere emissions (particles) of Ti-containing NPs from different industrial sources across 31 provinces in China mainland **Page 29–30**

## **Abbreviations:**

Air pollution control equipment (APCD)

Bag filter (BF)

Blast-furnace pig iron (BFI)

Cement kiln co-processing solid waste (CK)

Coal-fired power plant (CFPP)

Coking plant (COP)

Electric-arc furnace for steelmaking (EAF)

electrostatic precipitator (ESP)

European Monitoring and Evaluation Programme/European Environment Agency (EMEP/EEA)

Hazardous-waste incineration (HWI)

Iron-ore sintering (IOS)

Municipal solid-waste incineration (WI)

Particle matter (PM)

Particle number concentration (PNC)

Particle size distribution (PSD)

Primary copper smelting (PCu)

Secondary aluminum smelting (SAI)

Secondary copper smelting (SCu)

Secondary lead smelting (SPb)

Secondary zinc smelting (SZn)

Single particle - inductively coupled plasma - time of flight - mass spectrometry (SP-ICP-TOF-MS)

United Nations Environment Programme (UNEP)

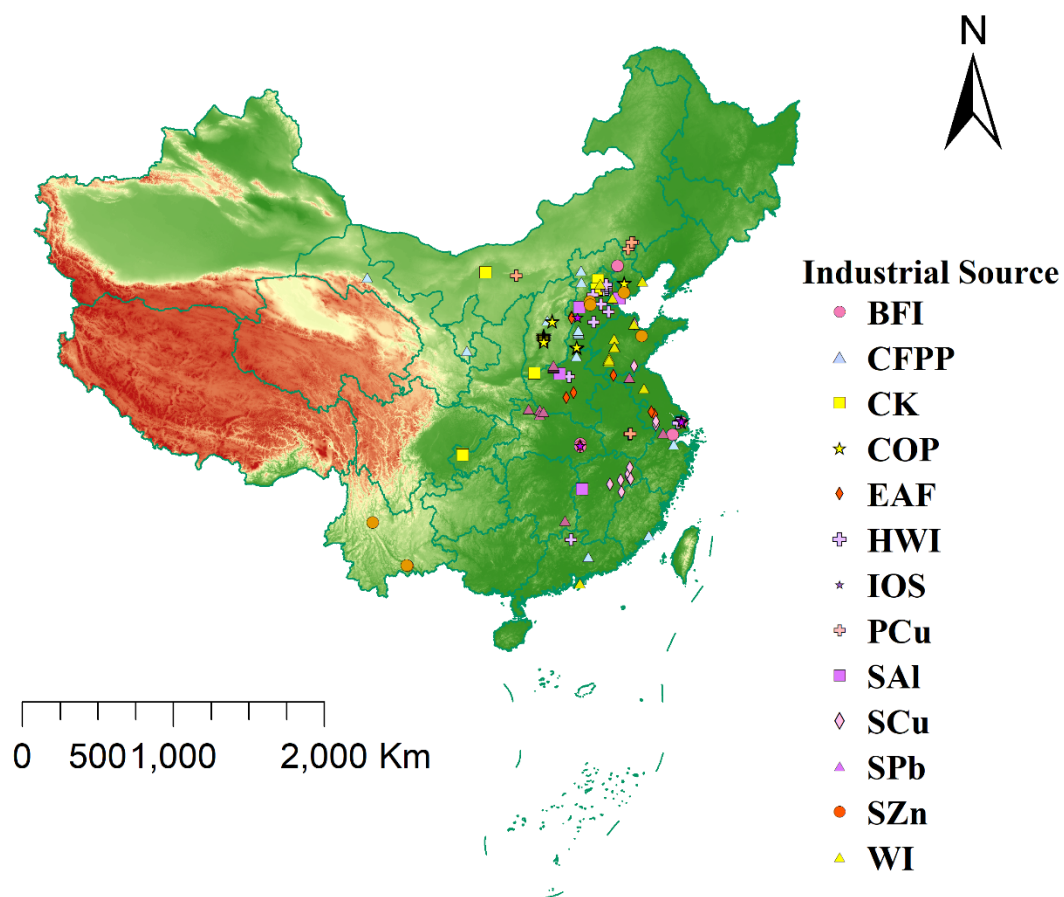

**Fig. S1** Distribution map of sampling sites for 132 industrial PM samples\*

\*Part of sampling site were also shown in our previous manuscript <sup>1</sup>. The map is based on free vector data sourced from the “Database of National Catalogue Service for Geographic Information [GS (2020)4619]” (<https://www.resdc.cn/DOI/doi.aspx?DOIid=122>) and created using ArcGIS software.

(a)

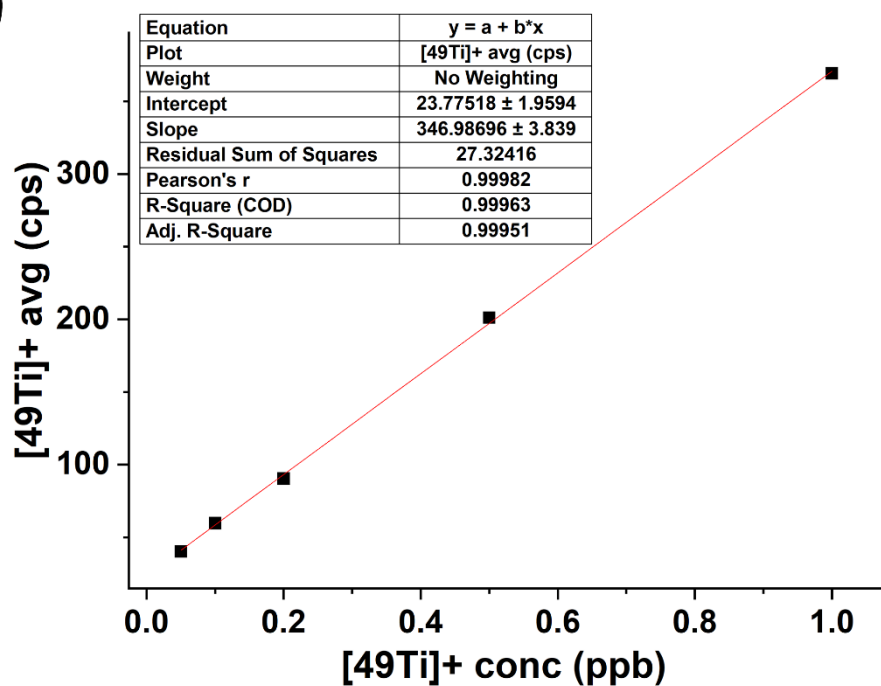

(b)

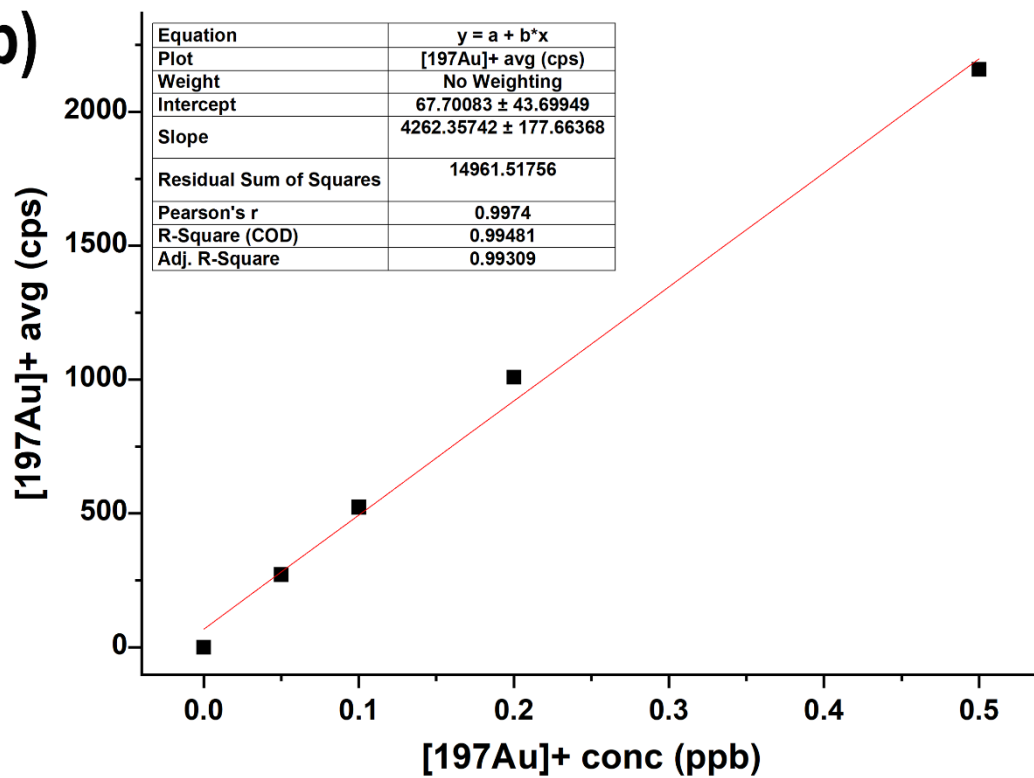

Fig. S2 Standard curves for (a) Ti ions and (b) Au ions

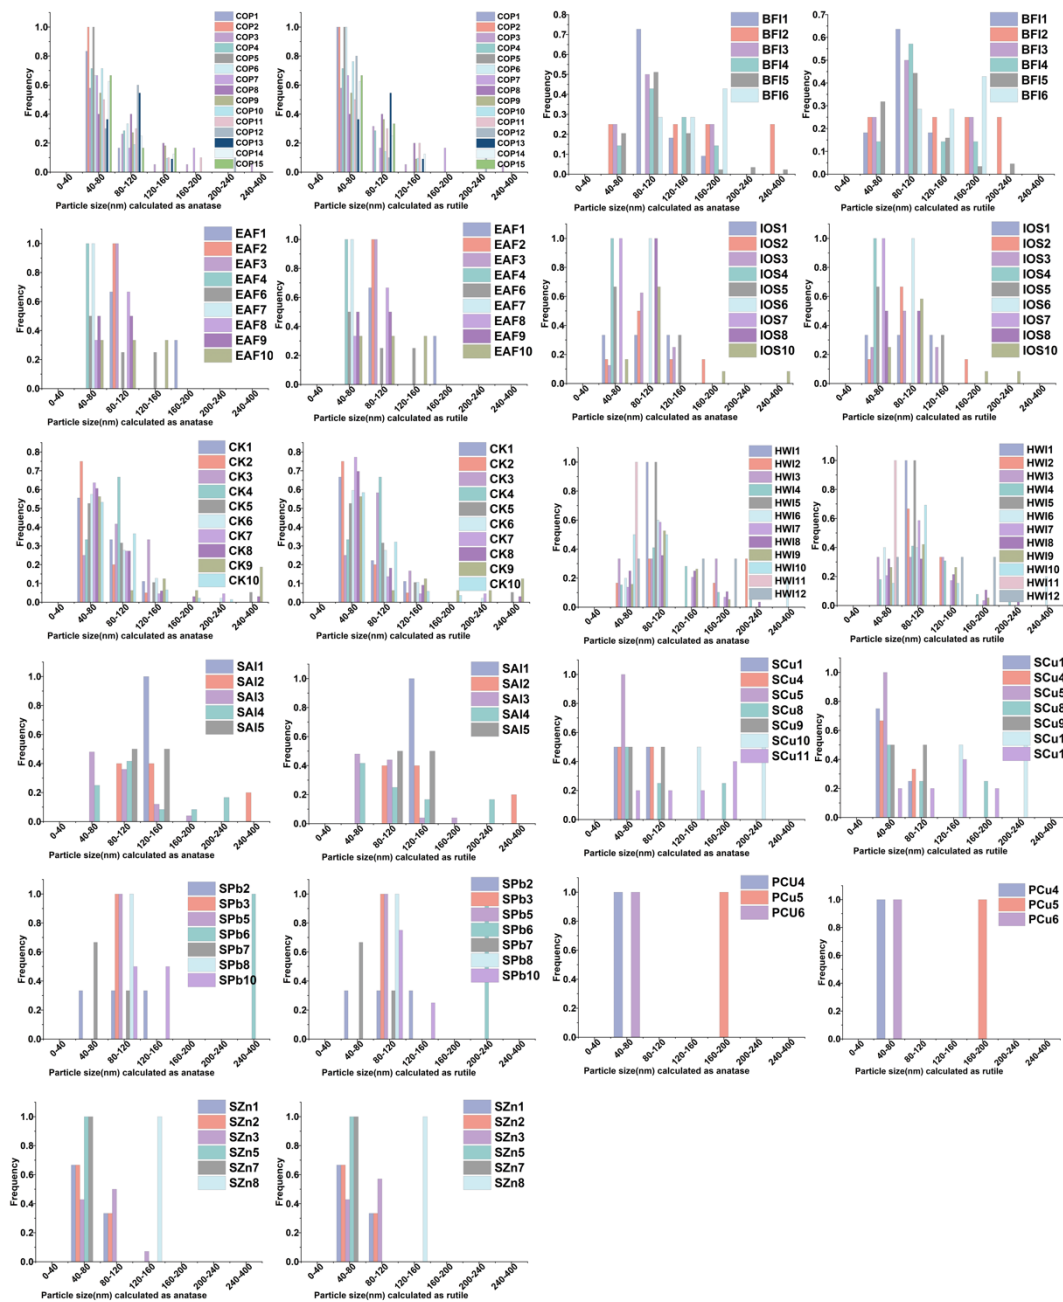

Fig. S3 PSDs of Ti-containing NPs from various industrial sources

**Table S1.** Detailed information on particulate matter samples from 132 industrial activities

| Number | Sample ID | Provinces      | City/District | Industrial activities                               | Raw material                            | APCD   |
|--------|-----------|----------------|---------------|-----------------------------------------------------|-----------------------------------------|--------|
| 1      | BF11      | Hebei          | Chengde       | blast furnace pig iron                              | Coke, hematite ore                      | BF     |
| 2      | BF12      | Hebei          | Chengde       | blast furnace pig iron                              | Coke, hematite ore                      | BF     |
| 3      | BF13      | Shanghai       | Baoshan       | blast furnace pig iron                              | Coke, hematite ore                      | BF     |
| 4      | BF14      | Hubei          | Wuhan         | blast furnace pig iron                              | Coke, hematite ore                      | BF     |
| 5      | BF15      | Zhejiang       | Jiaxing       | blast furnace pig iron                              | Coke, hematite ore                      | BF     |
| 6      | BF16      | Hubei          | Wuhan         | blast furnace pig iron                              | Coke, hematite ore                      | BF     |
| 7      | CFPP1     | Hebei          | Xingtai       | Coal-Fired Power Plant                              | Bituminous coal, anthracite and lignite | BF     |
| 8      | CFPP2     | Hebei          | Zhangjiakou   | Coal-Fired Power Plant                              | Bituminous coal, anthracite and lignite | BF     |
| 9      | CFPP3     | Zhejiang       | Jiaxing       | Coal-Fired Power Plant                              | Bituminous coal, anthracite and lignite | BF     |
| 10     | CFPP4     | Hebei          | Xingtai       | Coal-Fired Power Plant                              | Bituminous coal, anthracite and lignite | BF     |
| 11     | CFPP5     | Hebei          | Xingtai       | Coal-Fired Power Plant                              | Bituminous coal, anthracite and lignite | BF     |
| 12     | CFPP6     | Hebei          | Tangshan      | Coal-Fired Power Plant                              | Bituminous coal, anthracite and lignite | BF     |
| 13     | CFPP7     | Hebei          | Tangshan      | Coal-Fired Power Plant                              | Bituminous coal, anthracite and lignite | BF     |
| 14     | CFPP8     | Gansu          | Jiayuguan     | Coal-Fired Power Plant                              | Bituminous coal, anthracite and lignite | BF     |
| 15     | CFPP9     | Shanxi         | Gujiao        | Coal-Fired Power Plant                              | Bituminous coal, anthracite and lignite | BF     |
| 16     | CFPP10    | Ningxia        | Guyuan        | Coal-Fired Power Plant                              | Bituminous coal, anthracite and lignite | BF     |
| 17     | CFPP11    | Guangdong      | Heyuan        | Coal-Fired Power Plant                              | Bituminous coal, anthracite and lignite | BF     |
| 18     | CFPP12    | Hebei          | Zhangjiakou   | Coal-Fired Power Plant                              | Bituminous coal, anthracite and lignite | BF     |
| 19     | CFPP13    | Hebei          | Langfang      | Coal-Fired Power Plant                              | Bituminous coal, anthracite and lignite | BF     |
| 20     | CFPP14    | Henan          | Hebi          | Coal-Fired Power Plant                              | Bituminous coal, anthracite and lignite | BF     |
| 21     | CFPP15    | Fujian         | Quanzhou      | Coal-Fired Power Plant                              | Bituminous coal, anthracite and lignite | BF     |
| 22     | CK1       | Beijing        | Changping     | Cement Kilns Coordinate the Disposal of Solid Waste | Solid Danger Waste                      | ESP&BF |
| 23     | CK2       | Beijing        | Changping     | Cement Kilns Coordinate the Disposal of Solid Waste | Solid Danger Waste                      | ESP&BF |
| 24     | CK3       | Beijing        | Fangshan      | Cement Kilns Coordinate the Disposal of Solid Waste | Solid Danger Waste                      | ESP&BF |
| 25     | CK4       | Beijing        | Fangshan      | Cement Kilns Coordinate the Disposal of Solid Waste | Solid Danger Waste                      | ESP&BF |
| 26     | CK5       | Beijing        | Fangshan      | Cement Kilns Coordinate the Disposal of Solid Waste | Solid Danger Waste                      | ESP&BF |
| 27     | CK6       | Inner Mongolia | Bayannur      | Cement Kilns Coordinate the Disposal of Solid Waste | Solid Danger Waste                      | ESP&BF |

|    |       |           |              |                                                     |                    |        |
|----|-------|-----------|--------------|-----------------------------------------------------|--------------------|--------|
| 28 | CK7   | Henan     | Sanmenxia    | Cement Kilns Coordinate the Disposal of Solid Waste | Solid Danger Waste | ESP&BF |
| 29 | CK8   | Beijing   | Fangshan     | Cement Kilns Coordinate the Disposal of Solid Waste | Solid Danger Waste | ESP&BF |
| 30 | CK9   | Chongqing | Hechuan      | Cement Kilns Coordinate the Disposal of Solid Waste | Solid Danger Waste | ESP&BF |
| 31 | CK10  | Chongqing | Hechuan      | Cement Kilns Coordinate the Disposal of Solid Waste | Solid Danger Waste | ESP&BF |
| 32 | COP1  | Shanxi    | Jiexiu       | Coking Plant                                        | Coal               | BF     |
| 33 | COP2  | Shanxi    | Taiyuan      | Coking Plant                                        | Coal               | BF     |
| 34 | COP3  | Shanxi    | Taiyuan      | Coking Plant                                        | Coal               | BF     |
| 35 | COP4  | Shanghai  | Baoshan      | Coking Plant                                        | Coal               | BF     |
| 36 | COP5  | Hebei     | Tangshan     | Coking Plant                                        | Coal               | BF     |
| 37 | COP6  | Hebei     | Tangshan     | Coking Plant                                        | Coal               | BF     |
| 38 | COP7  | Shanghai  | Baoshan      | Coking Plant                                        | Coal               | BF     |
| 39 | COP8  | Hebei     | Handan       | Coking Plant                                        | Coal               | BF     |
| 40 | COP9  | Hebei     | Handan       | Coking Plant                                        | Coal               | BF     |
| 41 | COP10 | Hebei     | Handan       | Coking Plant                                        | Coal               | BF     |
| 42 | COP11 | Shanxi    | Taiyuan      | Coking Plant                                        | Coal               | BF     |
| 43 | COP12 | Shanxi    | Taiyuan      | Coking Plant                                        | Coal               | BF     |
| 44 | COP13 | Shanxi    | Taiyuan      | Coking Plant                                        | Coal               | BF     |
| 45 | COP14 | Shanxi    | Taiyuan      | Coking Plant                                        | Coal               | BF     |
| 46 | COP15 | Shanxi    | Taiyuan      | Coking Plant                                        | Coal               | BF     |
| 47 | EAF1  | Jiangsu   | Zhenjiang    | Electric Arc Furnace Steelmaking                    | Scrap              | BF     |
| 48 | EAF2  | Jiangsu   | Xuzhou       | Electric Arc Furnace Steelmaking                    | Scrap              | BF     |
| 49 | EAF3  | Henan     | Luohe        | Electric Arc Furnace Steelmaking                    | Scrap              | BF     |
| 50 | EAF4  | Shanghai  | Baoshan      | Electric Arc Furnace Steelmaking                    | Scrap              | BF     |
| 51 | EAF5  | Jiangsu   | Zhenjiang    | Electric Arc Furnace Steelmaking                    | Scrap              | BF     |
| 52 | EAF6  | Jiangsu   | Xuzhou       | Electric Arc Furnace Steelmaking                    | Scrap              | BF     |
| 53 | EAF7  | Henan     | Luohe        | Electric Arc Furnace Steelmaking                    | Scrap              | BF     |
| 54 | EAF8  | Hebei     | Shijiazhuang | Electric Arc Furnace Steelmaking                    | Scrap              | BF     |
| 55 | EAF9  | Hebei     | Shijiazhuang | Electric Arc Furnace Steelmaking                    | Scrap              | BF     |
| 56 | EAF10 | Hubei     | Wuhan        | Electric Arc Furnace Steelmaking                    | Scrap              | BF     |



|    |       |                |          |                             |                                       |        |
|----|-------|----------------|----------|-----------------------------|---------------------------------------|--------|
| 57 | HWI1  | Guangdong      | Shaoguan | hazardous waste incinerator | Hazardous waste such as medical waste | BF     |
| 58 | HWI2  | Hebei          | Baoding  | hazardous waste incinerator | Hazardous waste such as medical waste | BF     |
| 59 | HWI3  | Shanghai       | Shanghai | hazardous waste incinerator | Hazardous waste such as medical waste | BF     |
| 60 | HWI4  | Shanghai       | Shanghai | hazardous waste incinerator | Hazardous waste such as medical waste | BF     |
| 61 | HWI5  | Hebei          | Cangzhou | hazardous waste incinerator | Hazardous waste such as medical waste | BF     |
| 62 | HWI6  | Beijing        | Tongzhou | hazardous waste incinerator | Hazardous waste such as medical waste | BF     |
| 63 | HWI7  | Beijing        | Tongzhou | hazardous waste incinerator | Hazardous waste such as medical waste | BF     |
| 64 | HWI8  | Beijing        | Tongzhou | hazardous waste incinerator | Hazardous waste such as medical waste | BF     |
| 65 | HWI9  | Hebei          | Hengshui | hazardous waste incinerator | Hazardous waste such as medical waste | BF     |
| 66 | HWI10 | Hebei          | Cangzhou | hazardous waste incinerator | Hazardous waste such as medical waste | BF     |
| 67 | HWI11 | Beijing        | Tongzhou | hazardous waste incinerator | Hazardous waste such as medical waste | BF     |
| 68 | HWI12 | Henan          | Xinzheng | hazardous waste incinerator | Hazardous waste such as medical waste | BF     |
| 69 | IOS1  | Hebei          | Tangshan | Iron Ore Sintering          | Iron Ore                              | ESP&BF |
| 70 | IOS2  | Shanghai       | Baoshan  | Iron Ore Sintering          | Iron Ore                              | ESP&BF |
| 71 | IOS3  | Shanghai       | Baoshan  | Iron Ore Sintering          | Iron Ore                              | ESP&BF |
| 72 | IOS4  | Shanghai       | Baoshan  | Iron Ore Sintering          | Iron Ore                              | ESP&BF |
| 73 | IOS5  | Shanghai       | Baoshan  | Iron Ore Sintering          | Iron Ore                              | ESP&BF |
| 74 | IOS6  | Shanghai       | Baoshan  | Iron Ore Sintering          | Iron Ore                              | ESP&BF |
| 75 | IOS7  | Shanghai       | Baoshan  | Iron Ore Sintering          | Iron Ore                              | ESP&BF |
| 76 | IOS8  | Shanghai       | Baoshan  | Iron Ore Sintering          | Iron Ore                              | ESP&BF |
| 77 | IOS9  | Shanghai       | Baoshan  | Iron Ore Sintering          | Iron Ore                              | ESP&BF |
| 78 | IOS10 | Hubei          | Wuhan    | Iron Ore Sintering          | Iron Ore                              | ESP&BF |
| 79 | PCu1  | Inner Mongolia | Baotou   | Primary Copper Smelting     | copper ore                            | ESP&BF |
| 80 | PCu2  | Inner Mongolia | Chifeng  | Primary Copper Smelting     | copper ore                            | ESP&BF |
| 81 | PCu3  | Inner Mongolia | Chifeng  | Primary Copper Smelting     | copper ore                            | ESP&BF |
| 82 | PCu4  | Inner Mongolia | Chifeng  | Primary Copper Smelting     | copper ore                            | ESP&BF |
| 83 | PCu5  | Anhui          | Tongling | Primary Copper Smelting     | copper ore                            | ESP&BF |
| 84 | PCu6  | Anhui          | Tongling | Primary Copper Smelting     | copper ore                            | ESP&BF |
| 85 | SA11  | Tianjin        | Tianjin  | Secondary Aluminum Smelting | Waste Aluminium                       | ESP    |

|     |       |          |           |                             |                    |                |
|-----|-------|----------|-----------|-----------------------------|--------------------|----------------|
| 86  | SA12  | Tianjin  | Tianjin   | Secondary Aluminum Smelting | Waste Aluminium    | ESP            |
| 87  | SA13  | Jiangxi  | Yichun    | Secondary Aluminum Smelting | Waste Aluminium    | ESP            |
| 88  | SA14  | Hebei    | Baoding   | Secondary Aluminum Smelting | Waste Aluminium    | ESP            |
| 89  | SA15  | Henan    | Gongyi    | Secondary Aluminum Smelting | Waste Aluminium    | ESP            |
| 90  | SCu1  | Jiangxi  | Shangrao  | Secondary Copper Smelting   | Waste Mixed Copper | ESP&BF         |
| 91  | SCu2  | Jiangxi  | Shangrao  | Secondary Copper Smelting   | Waste Mixed Copper | ESP&BF         |
| 92  | SCu3  | Jiangxi  | Guixi     | Secondary Copper Smelting   | Waste Mixed Copper | ESP&BF         |
| 93  | SCu4  | Jiangxi  | Fuzhou    | Secondary Copper Smelting   | Waste Mixed Copper | ESP&BF         |
| 94  | SCu5  | Jiangxi  | Shangrao  | Secondary Copper Smelting   | Waste Mixed Copper | ESP&BF         |
| 95  | SCu6  | Jiangxi  | Shangrao  | Secondary Copper Smelting   | Waste Mixed Copper | ESP&BF         |
| 96  | SCu7  | Shandong | Linyi     | Secondary Copper Smelting   | Waste Mixed Copper | ESP&BF         |
| 97  | SCu8  | Shandong | Dongying  | Secondary Copper Smelting   | Waste Mixed Copper | ESP&BF         |
| 98  | SCu9  | Jiangsu  | Wuxi      | Secondary Copper Smelting   | Waste Mixed Copper | ESP&BF         |
| 99  | SCu10 | Jiangsu  | Wuxi      | Secondary Copper Smelting   | Waste Mixed Copper | ESP&BF         |
| 100 | SCu11 | Jiangxi  | Guixi     | Secondary Copper Smelting   | Waste Mixed Copper | ESP&BF         |
| 101 | SPb1  | Hunan    | Bangzhou  | Secondary Lead Smelting     | Waste Lead         | BF-coated film |
| 102 | SPb2  | Henan    | Jiyuan    | Secondary Lead Smelting     | Waste Lead         | BF-coated film |
| 103 | SPb3  | Henan    | Jiyuan    | Secondary Lead Smelting     | Waste Lead         | BF-coated film |
| 104 | SPb4  | Henan    | Jiyuan    | Secondary Lead Smelting     | Waste Lead         | BF-coated film |
| 105 | SPb5  | Henan    | Jiyuan    | Secondary Lead Smelting     | Waste Lead         | BF-coated film |
| 106 | SPb6  | Hubei    | Xiangyang | Secondary Lead Smelting     | Waste Lead         | BF-coated film |
| 107 | SPb7  | Hubei    | Xiangyang | Secondary Lead Smelting     | Waste Lead         | BF-coated film |
| 108 | SPb8  | Jiangsu  | Xuzhou    | Secondary Lead Smelting     | Waste Lead         | BF-coated film |
| 109 | SPb9  | Hubei    | Xiangyang | Secondary Lead Smelting     | Waste Lead         | BF-coated film |
| 110 | SPb10 | Hubei    | Shiyan    | Secondary Lead Smelting     | Waste Lead         | BF-coated film |
| 111 | SPb11 | Zhejiang | Huzhou    | Secondary Lead Smelting     | Waste Lead         | BF-coated film |
| 112 | SZn1  | Yunnan   | Yuanyang  | Secondary Zinc Smelting     | Waste Mixed Zinc   | BF-coated film |
| 113 | SZn2  | Yunnan   | Dali      | Secondary Zinc Smelting     | Waste Mixed Zinc   | BF-coated film |
| 114 | SZn3  | Yunnan   | Yuanyang  | Secondary Zinc Smelting     | Waste Mixed Zinc   | BF-coated film |

|     |      |           |             |                         |                        |                |
|-----|------|-----------|-------------|-------------------------|------------------------|----------------|
| 115 | SZn4 | Hebei     | Tangshan    | Secondary Zinc Smelting | Waste Mixed Zinc       | BF-coated film |
| 116 | SZn5 | Shandong  | Weifang     | Secondary Zinc Smelting | Waste Mixed Zinc       | BF-coated film |
| 117 | SZn6 | Hebei     | Baoding     | Secondary Zinc Smelting | Waste Mixed Zinc       | BF-coated film |
| 118 | SZn7 | Hebei     | Baoding     | Secondary Zinc Smelting | Waste Mixed Zinc       | BF-coated film |
| 119 | SZn8 | Hebei     | Baoding     | Secondary Zinc Smelting | Waste Mixed Zinc       | BF-coated film |
| 120 | WI1  | Beijing   | Haidian     | Waste Incineration      | Municipal soiled waste | BF             |
| 121 | WI2  | Hebei     | Qinhuangdao | Waste Incineration      | Municipal soiled waste | BF             |
| 122 | WI3  | Tianjin   | Tianjin     | Waste Incineration      | Municipal soiled waste | BF             |
| 123 | WI4  | Shandong  | Dongying    | Waste Incineration      | Municipal soiled waste | BF             |
| 124 | WI5  | Shandong  | Taian       | Waste Incineration      | Municipal soiled waste | BF             |
| 125 | WI6  | Shandong  | Taian       | Waste Incineration      | Municipal soiled waste | BF             |
| 126 | WI7  | Shandong  | Jining      | Waste Incineration      | Municipal soiled waste | BF             |
| 127 | WI8  | Shandong  | Jining      | Waste Incineration      | Municipal soiled waste | BF             |
| 128 | WI9  | Shandong  | Jining      | Waste Incineration      | Municipal soiled waste | BF             |
| 129 | WI10 | Jiangsu   | Huaian      | Waste Incineration      | Municipal soiled waste | BF             |
| 130 | WI11 | Shandong  | Jinan       | Waste Incineration      | Municipal soiled waste | BF             |
| 131 | WI12 | Shandong  | Jining      | Waste Incineration      | Municipal soiled waste | BF             |
| 132 | WI13 | Hong Kong | Hong Kong   | Waste Incineration      | Municipal soiled waste | BF             |

Note: Air pollution control equipment (APCD); ESP (electrostatic precipitator); BF (bag filter)

Part of these sample information were also shown in our previous study <sup>1</sup> (Nature Sustainability 2024, DOI:10.1038/s41893-024-01388-6).

**Table S2** Parameters used for access the LADD<sub>inh</sub>.

| Parameters                                               | Adult               | Child               |
|----------------------------------------------------------|---------------------|---------------------|
| C (Ti-containing NPs, particles/m <sup>3</sup> )         | 1.7×10 <sup>7</sup> | 1.7×10 <sup>7</sup> |
| inhR (inhalation rate, m <sup>3</sup> /day) <sup>2</sup> | 20                  | 8                   |
| EF (exposure frequency, day/year) <sup>2</sup>           | 365                 | 365                 |
| ED (exposure duration, year) <sup>2</sup>                | 24                  | 6                   |
| BW (body weight, kg) <sup>2</sup>                        | 70                  | 15                  |
| AT (days) CR, 70*365 <sup>2</sup>                        | 25550               | 25550               |
| AT (days) non-CR, ED*365 <sup>2</sup>                    | 8760                | 2190                |

**Table S3.** PNCs of Ti-containing NPs emitted by 132 industrial processes across 13 sectors

| Industry | Mean (Particles/g)   | Median (Particles/g) | Range (Particles/g)                       |
|----------|----------------------|----------------------|-------------------------------------------|
| EAF      | 2.0×10 <sup>9</sup>  | 1.4×10 <sup>9</sup>  | 2.7×10 <sup>8</sup> -5.7×10 <sup>9</sup>  |
| COP      | 8.8×10 <sup>8</sup>  | 8.6×10 <sup>8</sup>  | 7.8×10 <sup>7</sup> -3.0×10 <sup>9</sup>  |
| CK       | 1.9×10 <sup>9</sup>  | 8.2×10 <sup>8</sup>  | 3.2×10 <sup>8</sup> -1.9×10 <sup>10</sup> |
| CFPP     | 1.7×10 <sup>10</sup> | 1.1×10 <sup>10</sup> | 6.8×10 <sup>8</sup> -4.2×10 <sup>11</sup> |
| PCu      | 1.4×10 <sup>8</sup>  | 1.3×10 <sup>8</sup>  | 1.4×10 <sup>7</sup> -2.7×10 <sup>8</sup>  |
| SCu      | 3.3×10 <sup>8</sup>  | 2.8×10 <sup>8</sup>  | 1.4×10 <sup>7</sup> -8.3×10 <sup>8</sup>  |
| SAI      | 3.1×10 <sup>8</sup>  | 2.9×10 <sup>8</sup>  | 2.9×10 <sup>7</sup> -3.6×10 <sup>9</sup>  |
| SPb      | 2.8×10 <sup>8</sup>  | 8.3×10 <sup>7</sup>  | 2.6×10 <sup>7</sup> -4.4×10 <sup>9</sup>  |
| SZn      | 1.3×10 <sup>8</sup>  | 9.2×10 <sup>7</sup>  | 2.7×10 <sup>7</sup> -2.0×10 <sup>9</sup>  |
| WI       | 7.7×10 <sup>9</sup>  | 7.9×10 <sup>9</sup>  | 9.7×10 <sup>8</sup> -2.6×10 <sup>10</sup> |
| HWI      | 2.2×10 <sup>9</sup>  | 2.8×10 <sup>9</sup>  | 6.7×10 <sup>8</sup> -4.2×10 <sup>10</sup> |
| BFI      | 5.5×10 <sup>9</sup>  | 5.3×10 <sup>9</sup>  | 1.1×10 <sup>9</sup> -1.0×10 <sup>10</sup> |
| IOS      | 3.2×10 <sup>8</sup>  | 2.8×10 <sup>8</sup>  | 9.7×10 <sup>7</sup> -1.3×10 <sup>9</sup>  |

**Table S4** The mass (g) of each single Ti-containing particle is determined by 132 actual industrial process from thirteen industrial sectors.

Single Excel

**Table S5.** PSDs of Ti-containing NPs (calculated as anatase-TiO<sub>2</sub>) from 132 industrial processes across 13 sectors

| Sample ID | Mean (nm) | Median (nm) | Range (nm)  |
|-----------|-----------|-------------|-------------|
| BFI1      | 103.1     | 91.6        | 80.5 -161.3 |
| BFI2      | 167.0     | 174.3       | 73.2 -246.2 |
| BFI3      | 116.2     | 105.2       | 75.5 -179.1 |
| BFI4      | 117.4     | 119.7       | 78.9 -166.8 |
| BFI5      | 112.2     | 94.2        | 68.9 -488.6 |
| BFI6      | 147.2     | 152.1       | 91.0 -190.7 |
| CFPP1     | 92.1      | 81.7        | 56.5 -373.6 |
| CFPP2     | 94.3      | 83.5        | 59.4 -263.0 |
| CFPP3     | 79.6      | 70.6        | 58.2 -194.5 |

|        |       |       |             |
|--------|-------|-------|-------------|
| CFPP4  | 89.7  | 79.7  | 59.2 -232.0 |
| CFPP5  | 86.0  | 76.8  | 60.2 -179.2 |
| CFPP6  | 91.2  | 80.1  | 56.4 -296.8 |
| CFPP7  | 86.8  | 76.8  | 58.7 -269.5 |
| CFPP8  | 85.5  | 78.1  | 58.9 -321.1 |
| CFPP9  | 84.6  | 77.0  | 58.0 -240.1 |
| CFPP10 | 96.2  | 77.5  | 58.3 -313.7 |
| CFPP11 | 88.1  | 79.2  | 56.8 -219.6 |
| CFPP12 | 87.8  | 78.3  | 56.6 -203.7 |
| CFPP13 | 84.2  | 72.7  | 58.2 -307.8 |
| CFPP14 | 85.0  | 76.1  | 59.8 -163.9 |
| CFPP15 | 76.1  | 74.0  | 62.1 -92.7  |
| CK1    | 86.1  | 79.4  | 63.4 -138.6 |
| CK2    | 76.6  | 68.2  | 59.6 -143.6 |
| CK3    | 109.0 | 116.7 | 68.7 -155.8 |
| CK4    | 82.5  | 87.4  | 63.0 -96.9  |
| CK5    | 92.0  | 76.8  | 59.6 -279.4 |
| CK6    | 86.6  | 78.7  | 59.7 -217.4 |
| CK7    | 82.2  | 74.0  | 61.2 -210.6 |
| CK8    | 92.2  | 76.3  | 61.2 -374.6 |
| CK9    | 130.7 | 79.5  | 63.4 -352.2 |
| CK10   | 86.0  | 76.3  | 58.1 -207.6 |
| COP1   | 71.1  | 70.0  | 61.4 -81.0  |
| COP2   | 70.1  | 68.7  | 66.9 -74.6  |
| COP3   | 96.5  | 77.3  | 60.5 -290.9 |
| COP4   | 72.8  | 68.8  | 61.5 -93.0  |
| COP5   | 108.1 | 68.7  | 62.0 -417.3 |
| COP6   | 78.8  | 78.2  | 75.5 -82.7  |
| COP7   | 92.6  | 75.8  | 69.0 -174.8 |
| COP8   | 98.7  | 98.5  | 62.1 -149.8 |
| COP9   | 86.8  | 79.0  | 62.7 -142.8 |
| COP10  | 81.9  | 72.2  | 61.3 -136.4 |
| COP11  | 90.2  | 78.0  | 63.7 -163.3 |
| COP12  | 94.5  | 81.1  | 66.5 -225.6 |
| COP13  | 88.1  | 84.0  | 63.1 -138.3 |
| COP14  | 82.1  | 67.4  | 61.6 -138.2 |
| COP15  | 83.7  | 71.9  | 67.2 -123.1 |
| EAF1   | 130.2 | 111.5 | 89.8 -189.4 |
| EAF2   | 87.2  | 87.2  | 83.5 -90.9  |
| EAF3   | 90.1  | 90.1  | 90.1 -90.1  |
| EAF4   | 64.1  | 64.1  | 64.1 -64.1  |
| EAF6   | 100.4 | 97.2  | 70.0 -137.1 |
| EAF7   | 63.4  | 63.4  | 63.4 -63.4  |
| EAF8   | 91.0  | 101.4 | 66.5 -105.2 |
| EAF9   | 79.5  | 79.5  | 68.7 -90.2  |
| EAF10  | 97.3  | 97.0  | 67.5 -127.4 |
| HWI1   | 88.6  | 88.6  | 88.6 -88.6  |
| HWI2   | 152.0 | 144.7 | 79.2 -234.1 |

|       |       |       |              |
|-------|-------|-------|--------------|
| HWI3  | 116.8 | 112.5 | 72.2 -165.7  |
| HWI4  | 122.0 | 118.3 | 72.9 -229.3  |
| HWI5  | 96.0  | 96.0  | 93.8 -98.2   |
| HWI6  | 132.4 | 84.6  | 75.2 -318.8  |
| HWI7  | 106.5 | 106.5 | 106.5 -106.5 |
| HWI8  | 116.3 | 109.1 | 70.4 -221.5  |
| HWI9  | 133.4 | 118.9 | 87.4 -217.9  |
| HWI10 | 106.9 | 107.5 | 78.9 -143.1  |
| HWI11 | 77.9  | 77.9  | 77.9 -77.9   |
| HWI12 | 140.8 | 160.0 | 73.0 -189.5  |
| IOS1  | 113.7 | 105.9 | 79.6 -155.7  |
| IOS2  | 111.9 | 107.4 | 71.7 -170.3  |
| IOS3  | 102.4 | 94.6  | 79.1 -142.5  |
| IOS4  | 74.6  | 74.6  | 73.7 -75.5   |
| IOS5  | 96.0  | 75.3  | 75.2 -137.5  |
| IOS6  | 84.7  | 84.7  | 84.7 -84.7   |
| IOS7  | 72.0  | 72.0  | 72.0 -72.0   |
| IOS8  | 89.3  | 89.3  | 82.4 -96.1   |
| IOS10 | 108.0 | 87.7  | 73.1 -247.8  |
| PCu4  | 68.1  | 68.1  | 68.1 -68.1   |
| PCu5  | 168.7 | 168.7 | 168.7 -168.7 |
| PCu6  | 77.6  | 77.6  | 64.0 -91.3   |
| SAI1  | 276.9 | 276.9 | 130.9 -422.9 |
| SAI2  | 146.9 | 139.2 | 84.7 -255.6  |
| SAI3  | 92.0  | 92.1  | 60.5 -181.9  |
| SAI4  | 120.2 | 100.2 | 64.4 -233.9  |
| SAI5  | 114.3 | 114.3 | 86.6 -142.0  |
| SCu1  | 77.0  | 74.1  | 66.1 -93.5   |
| SCu4  | 78.6  | 74.3  | 63.5 -104.5  |
| SCu5  | 65.0  | 65.0  | 65.0 -65.0   |
| SCu8  | 106.6 | 92.9  | 62.3 -178.3  |
| SCu9  | 75.2  | 75.2  | 62.4 -88.0   |
| SCu10 | 181.9 | 181.9 | 152.4 -211.4 |
| SCu11 | 130.6 | 157.5 | 73.5 -168.2  |
| SPb2  | 113.6 | 114.9 | 73.8 -152.1  |
| SPb3  | 90.7  | 90.7  | 90.7 -90.7   |
| SPb5  | 85.2  | 85.2  | 85.2 -85.2   |
| SPb6  | 243.9 | 243.9 | 243.9 -243.9 |
| SPb7  | 76.1  | 74.1  | 69.3 -84.8   |
| SPb8  | 97.6  | 97.6  | 97.6 -97.6   |
| SPb10 | 117.4 | 116.2 | 101.1 -136.0 |
| SZn1  | 74.4  | 69.8  | 67.9 -85.3   |
| SZn2  | 81.8  | 68.0  | 61.6 -115.7  |
| SZn3  | 85.1  | 87.0  | 62.4 -120.9  |
| SZn5  | 67.8  | 67.8  | 67.8 -67.8   |
| SZn7  | 77.8  | 77.8  | 77.8 -77.8   |
| SZn8  | 131.8 | 131.8 | 126.2 -137.4 |
| WI1   | 127.3 | 110.0 | 75.8 -240.8  |

|      |       |       |             |
|------|-------|-------|-------------|
| WI2  | 114.4 | 102.6 | 74.9 -197.9 |
| WI3  | 105.9 | 100.4 | 73.9 -203.0 |
| WI4  | 100.1 | 101.4 | 83.3 -124.4 |
| WI5  | 88.8  | 87.2  | 73.2 -102.8 |
| WI6  | 83.8  | 82.0  | 70.6 -97.0  |
| WI7  | 90.6  | 85.1  | 76.0 -122.0 |
| WI8  | 100.9 | 97.8  | 72.0 -152.1 |
| WI9  | 114.8 | 115.3 | 87.1 -143.6 |
| WI10 | 101.6 | 100.3 | 75.1 -148.1 |
| WI12 | 100.6 | 91.2  | 76.0 -125.0 |
| WI13 | 142.7 | 115.0 | 71.1 -418.2 |

**Table S6.** PSDs of Ti-containing NPs (calculated as rutile-TiO<sub>2</sub>) from 132 industrial processes across 13 sectors

| <b>Sample ID</b> | <b>Mean (nm)</b> | <b>Median (nm)</b> | <b>Range (nm)</b> |
|------------------|------------------|--------------------|-------------------|
| BFI1             | 99.1             | 88.1               | 77.5 -155.1       |
| BFI2             | 160.6            | 167.7              | 70.4 -236.8       |
| BFI3             | 111.8            | 101.2              | 72.6 -172.2       |
| BFI4             | 112.9            | 115.1              | 75.9 -160.5       |
| BFI5             | 107.9            | 90.6               | 66.3 -469.9       |
| BFI6             | 141.6            | 146.3              | 87.5 -183.4       |
| CFPP1            | 88.6             | 78.5               | 54.3 -359.3       |
| CFPP2            | 90.7             | 80.3               | 57.1 -252.9       |
| CFPP3            | 76.6             | 67.9               | 56.0 -187.0       |
| CFPP4            | 86.3             | 76.6               | 56.9 -223.2       |
| CFPP5            | 82.7             | 73.9               | 57.9 -172.3       |
| CFPP6            | 87.7             | 77.0               | 54.2 -285.4       |
| CFPP7            | 83.5             | 73.9               | 56.4 -259.1       |
| CFPP8            | 82.2             | 75.1               | 56.6 -308.8       |
| CFPP9            | 81.4             | 74.0               | 55.8 -230.9       |
| CFPP10           | 92.5             | 74.5               | 56.1 -301.7       |
| CFPP11           | 84.7             | 76.2               | 54.7 -211.2       |
| CFPP12           | 84.4             | 75.3               | 54.4 -195.9       |
| CFPP13           | 81.0             | 69.9               | 56.0 -296.0       |
| CFPP14           | 81.7             | 73.2               | 57.5 -157.6       |
| CFPP15           | 73.1             | 71.1               | 59.7 -89.2        |
| CK1              | 82.8             | 76.4               | 61.0 -133.3       |
| CK2              | 73.6             | 65.6               | 57.4 -138.1       |
| CK3              | 104.8            | 112.2              | 66.1 -149.8       |
| CK4              | 79.3             | 84.1               | 60.6 -93.2        |
| CK5              | 88.5             | 73.8               | 57.3 -268.7       |
| CK6              | 83.3             | 75.7               | 57.5 -209.1       |
| CK7              | 79.1             | 71.2               | 58.8 -202.6       |
| CK8              | 88.6             | 73.3               | 58.8 -360.2       |
| CK9              | 125.7            | 76.5               | 61.0 -338.7       |
| CK10             | 82.7             | 73.4               | 55.9 -199.7       |
| COP1             | 68.4             | 67.3               | 59.0 -77.9        |

|       |       |       |              |
|-------|-------|-------|--------------|
| COP2  | 67.4  | 66.1  | 64.3 -71.7   |
| COP3  | 92.8  | 74.4  | 58.2 -279.7  |
| COP4  | 70.0  | 66.2  | 59.2 -89.5   |
| COP5  | 103.9 | 66.1  | 59.6 -401.3  |
| COP6  | 75.8  | 75.2  | 72.6 -79.5   |
| COP7  | 89.0  | 72.9  | 66.3 -168.1  |
| COP8  | 94.9  | 94.7  | 59.8 -144.1  |
| COP9  | 83.5  | 76.0  | 60.3 -137.4  |
| COP10 | 78.7  | 69.4  | 58.9 -131.2  |
| COP11 | 86.8  | 75.0  | 61.3 -157.0  |
| COP12 | 90.9  | 78.0  | 63.9 -217.0  |
| COP13 | 84.7  | 80.8  | 60.7 -133.0  |
| COP14 | 78.9  | 64.8  | 59.3 -132.9  |
| COP15 | 80.5  | 69.1  | 64.6 -118.4  |
| EA1   | 125.2 | 107.3 | 86.3 -182.2  |
| EA2   | 83.9  | 83.9  | 80.3 -87.4   |
| EA3   | 86.6  | 86.6  | 86.6 -86.6   |
| EA4   | 61.6  | 61.6  | 61.6 -61.6   |
| EA6   | 96.5  | 93.5  | 67.3 -131.9  |
| EA7   | 61.0  | 61.0  | 61.0 -61.0   |
| EA8   | 87.5  | 97.5  | 63.9 -101.2  |
| EA9   | 76.4  | 76.4  | 66.1 -86.7   |
| EA10  | 93.6  | 93.3  | 64.9 -122.6  |
| HW1   | 85.2  | 85.2  | 85.2 -85.2   |
| HW2   | 113.8 | 96.3  | 89.2 -155.9  |
| HW3   | 112.3 | 108.2 | 69.4 -159.3  |
| HW4   | 117.4 | 113.7 | 70.1 -220.5  |
| HW5   | 92.3  | 92.3  | 90.3 -94.4   |
| HW6   | 127.3 | 81.4  | 72.3 -306.6  |
| HW7   | 102.0 | 96.2  | 71.5 -164.9  |
| HW8   | 111.9 | 104.9 | 67.7 -213.0  |
| HW9   | 102.6 | 92.3  | 68.7 -179.2  |
| HW10  | 102.8 | 103.4 | 75.9 -137.6  |
| HW11  | 74.9  | 74.9  | 74.9 -74.9   |
| HW12  | 135.4 | 153.8 | 70.2 -182.2  |
| IOS1  | 109.4 | 101.8 | 76.6 -149.8  |
| IOS2  | 107.7 | 103.3 | 68.9 -163.8  |
| IOS3  | 98.5  | 91.0  | 76.1 -137.0  |
| IOS4  | 71.8  | 71.8  | 70.9 -72.6   |
| IOS5  | 92.3  | 72.4  | 72.3 -132.2  |
| IOS6  | 81.4  | 81.4  | 81.4 -81.4   |
| IOS7  | 69.3  | 69.3  | 69.3 -69.3   |
| IOS8  | 85.8  | 85.8  | 79.3 -92.4   |
| IOS10 | 103.9 | 84.3  | 70.3 -238.3  |
| PCu4  | 65.5  | 65.5  | 65.5 -65.5   |
| PCu5  | 162.2 | 162.2 | 162.2 -162.2 |
| PCu6  | 74.7  | 74.7  | 61.5 -87.8   |
| SA11  | 266.3 | 266.3 | 125.9 -406.7 |



|       |       |       |              |
|-------|-------|-------|--------------|
| SAI2  | 141.3 | 133.8 | 81.5 -245.8  |
| SAI3  | 88.5  | 88.5  | 58.1 -174.9  |
| SAI4  | 115.6 | 96.4  | 62.0 -225.0  |
| SAI5  | 109.9 | 109.9 | 83.3 -136.5  |
| SCu1  | 74.0  | 71.3  | 63.6 -89.9   |
| SCu4  | 75.6  | 71.4  | 61.0 -100.5  |
| SCu5  | 62.5  | 62.5  | 62.5 -62.5   |
| SCu8  | 102.5 | 89.4  | 59.9 -171.5  |
| SCu9  | 72.3  | 72.3  | 60.0 -84.6   |
| SCu10 | 174.9 | 174.9 | 146.6 -203.3 |
| SCu11 | 125.6 | 151.4 | 70.7 -161.7  |
| SPb2  | 109.3 | 110.5 | 71.0 -146.3  |
| SPb3  | 87.2  | 87.2  | 87.2 -87.2   |
| SPb5  | 82.0  | 82.0  | 82.0 -82.0   |
| SPb6  | 234.6 | 234.6 | 234.6 -234.6 |
| SPb7  | 73.2  | 71.3  | 66.7 -81.6   |
| SPb8  | 93.9  | 93.9  | 93.9 -93.9   |
| SPb10 | 112.9 | 111.7 | 97.2 -130.8  |
| SZn1  | 71.5  | 67.1  | 65.3 -82.1   |
| SZn2  | 78.6  | 65.4  | 59.3 -111.2  |
| SZn3  | 81.9  | 83.7  | 60.0 -116.2  |
| SZn5  | 65.2  | 65.2  | 65.2 -65.2   |
| SZn7  | 74.9  | 74.9  | 74.9 -74.9   |
| SZn8  | 126.8 | 126.8 | 121.4 -132.1 |
| WI1   | 122.4 | 105.8 | 72.9 -231.5  |
| WI2   | 110.0 | 98.7  | 72.1 -190.3  |
| WI3   | 101.8 | 96.6  | 71.0 -195.2  |
| WI4   | 96.3  | 97.5  | 80.1 -119.7  |
| WI5   | 85.4  | 83.8  | 70.4 -98.8   |
| WI6   | 80.6  | 78.8  | 67.9 -93.3   |
| WI7   | 87.1  | 81.9  | 73.1 -117.4  |
| WI8   | 97.0  | 94.1  | 69.2 -146.3  |
| WI9   | 110.4 | 110.8 | 83.7 -138.1  |
| WI10  | 97.7  | 96.5  | 72.3 -142.4  |
| WI12  | 96.7  | 87.7  | 73.1 -120.3  |
| WI13  | 137.2 | 110.6 | 68.4 -402.2  |

---

**Table S7.** Emission factors (particles/t-product or particles/t-disposal) of Ti-containing NPs for various industry sectors

| Industry | Plant Number (N) | Emission Coefficient of industry PM (Kg/t) or (Kg/TWh) | Ti-Containing NPs (particles/g)-Mean | EF-Mean                              | EF-Median                            | EF-Range                                                     |
|----------|------------------|--------------------------------------------------------|--------------------------------------|--------------------------------------|--------------------------------------|--------------------------------------------------------------|
| BFI      | 6                | 0.045                                                  | $5.5 \times 10^9$                    | $2.5 \times 10^{11}$                 | $2.4 \times 10^{11}$                 | $4.9 \times 10^{10} \sim 4.5 \times 10^{11}$                 |
| CFPP     | 15               | 984 (kg/TWh)                                           | $1.7 \times 10^{10}$ (particles/g)   | $1.7 \times 10^{16}$ (particles/TWh) | $1.1 \times 10^{16}$ (particles/TWh) | $6.7 \times 10^{14} \sim 4.2 \times 10^{17}$ (particles/TWh) |
| CK       | 10               | 0.899                                                  | $1.9 \times 10^9$                    | $1.7 \times 10^{12}$                 | $7.4 \times 10^{11}$                 | $2.9 \times 10^{11} \sim 1.7 \times 10^{13}$                 |
| COP      | 15               | 0.442                                                  | $8.8 \times 10^8$                    | $3.9 \times 10^{11}$                 | $3.8 \times 10^{11}$                 | $3.4 \times 10^{10} \sim 1.3 \times 10^{12}$                 |
| EAF      | 10               | 0.105                                                  | $2.0 \times 10^9$                    | $2.1 \times 10^{11}$                 | $1.5 \times 10^{11}$                 | $2.8 \times 10^{10} \sim 5.9 \times 10^{11}$                 |
| HWI      | 12               | 0.0098                                                 | $2.2 \times 10^9$                    | $2.2 \times 10^{10}$                 | $2.8 \times 10^{10}$                 | $6.6 \times 10^9 \sim 4.2 \times 10^{11}$                    |
| IOS      | 10               | 0.065                                                  | $3.2 \times 10^8$                    | $2.1 \times 10^{10}$                 | $1.8 \times 10^{10}$                 | $6.3 \times 10^9 \sim 8.7 \times 10^{10}$                    |
| PCu      | 6                | 0.276                                                  | $1.4 \times 10^8$                    | $3.8 \times 10^{10}$                 | $3.6 \times 10^{10}$                 | $4.0 \times 10^9 \sim 7.4 \times 10^{10}$                    |
| SAI      | 5                | 0.478                                                  | $3.1 \times 10^8$                    | $1.5 \times 10^{11}$                 | $1.4 \times 10^{11}$                 | $1.4 \times 10^{10} \sim 1.7 \times 10^{12}$                 |
| SCu      | 11               | 0.479                                                  | $3.3 \times 10^8$                    | $1.6 \times 10^{11}$                 | $1.3 \times 10^{11}$                 | $6.9 \times 10^9 \sim 4.0 \times 10^{11}$                    |
| SPb      | 11               | 0.68                                                   | $2.8 \times 10^8$                    | $1.9 \times 10^{11}$                 | $5.7 \times 10^{10}$                 | $1.8 \times 10^{10} \sim 3.0 \times 10^{12}$                 |
| SZn      | 8                | 0.502                                                  | $1.3 \times 10^8$                    | $6.7 \times 10^{10}$                 | $4.6 \times 10^{10}$                 | $1.4 \times 10^{10} \sim 1.0 \times 10^{12}$                 |
| WI       | 13               | 0.0098                                                 | $7.7 \times 10^9$                    | $7.6 \times 10^{10}$                 | $7.8 \times 10^{10}$                 | $9.5 \times 10^9 \sim 2.5 \times 10^{11}$                    |

Note: The emission factor is the number of Ti-containing NPs emitted to the atmosphere by producing one ton of steel, copper, aluminum, lead, or zinc; disposing of one ton of waste; or producing one TWh.

**Table S8.** Atmospheric emissions (particles) of Ti-containing NPs from various industrial sources across the 31 provinces in mainland China

| Province | Region  | COP                  | CFPP                 | CK                   | EAF                  | IOS                  | WI                   | BFI                  | PCu                  | SCu                  | SZn                  | SPb                  | SAI                  | HWI                  |
|----------|---------|----------------------|----------------------|----------------------|----------------------|----------------------|----------------------|----------------------|----------------------|----------------------|----------------------|----------------------|----------------------|----------------------|
| Beijing  | Eastern | $0.0 \times 10^{00}$ | $7.5 \times 10^{20}$ | $3.5 \times 10^{18}$ | $0.0 \times 10^{00}$ | $3.8 \times 10^{16}$ | $3.0 \times 10^{17}$ | $0.0 \times 10^{00}$ | $1.5 \times 10^{14}$ | $5.7 \times 10^{15}$ |
| Tianjin  | Eastern | $6.8 \times 10^{17}$ | $1.3 \times 10^{21}$ | $9.0 \times 10^{18}$ | $4.2 \times 10^{17}$ | $1.0 \times 10^{18}$ | $1.0 \times 10^{17}$ | $4.5 \times 10^{18}$ | $0.0 \times 10^{00}$ | $3.0 \times 10^{15}$ | $0.0 \times 10^{00}$ | $0.0 \times 10^{00}$ | $2.3 \times 10^{16}$ | $1.5 \times 10^{16}$ |

|                |              |                      |                      |                      |                      |                      |                      |                      |                      |                      |                      |                      |                      |                      |
|----------------|--------------|----------------------|----------------------|----------------------|----------------------|----------------------|----------------------|----------------------|----------------------|----------------------|----------------------|----------------------|----------------------|----------------------|
| Hebei          | Eastern      | $1.9 \times 10^{19}$ | $4.9 \times 10^{21}$ | $1.7 \times 10^{20}$ | $5.0 \times 10^{18}$ | $5.7 \times 10^{18}$ | $2.6 \times 10^{17}$ | $5.0 \times 10^{19}$ | $0.0 \times 10^{00}$ | $5.5 \times 10^{15}$ | $1.8 \times 10^{15}$ | $0.0 \times 10^{00}$ | $4.9 \times 10^{16}$ | $1.0 \times 10^{17}$ |
| Shanxi         | Central      | $4.1 \times 10^{19}$ | $5.2 \times 10^{21}$ | $8.3 \times 10^{19}$ | $1.1 \times 10^{18}$ | $1.0 \times 10^{18}$ | $9.3 \times 10^{16}$ | $1.5 \times 10^{19}$ | $7.4 \times 10^{15}$ | $0.0 \times 10^{00}$ | $0.0 \times 10^{00}$ | $0.0 \times 10^{00}$ | $4.6 \times 10^{15}$ | $8.1 \times 10^{16}$ |
| Inner Mongolia | Western      | $1.6 \times 10^{19}$ | $8.3 \times 10^{21}$ | $6.1 \times 10^{19}$ | $4.8 \times 10^{17}$ | $4.8 \times 10^{17}$ | $7.0 \times 10^{16}$ | $5.8 \times 10^{18}$ | $1.3 \times 10^{16}$ | $7.0 \times 10^{14}$ | $0.0 \times 10^{00}$ | $1.8 \times 10^{16}$ | $1.2 \times 10^{16}$ | $1.3 \times 10^{17}$ |
| Liaoning       | Northeastern | $8.9 \times 10^{18}$ | $2.6 \times 10^{21}$ | $6.7 \times 10^{19}$ | $1.4 \times 10^{18}$ | $1.5 \times 10^{18}$ | $0.0 \times 10^{00}$ | $1.7 \times 10^{19}$ | $4.2 \times 10^{15}$ | $0.0 \times 10^{00}$ | $0.0 \times 10^{00}$ | $7.7 \times 10^{13}$ | $3.4 \times 10^{15}$ | $4.4 \times 10^{16}$ |
| Jilin          | Northeastern | $1.4 \times 10^{18}$ | $1.3 \times 10^{21}$ | $3.0 \times 10^{19}$ | $2.5 \times 10^{17}$ | $2.7 \times 10^{17}$ | $1.0 \times 10^{17}$ | $3.4 \times 10^{18}$ | $4.8 \times 10^{15}$ | $0.0 \times 10^{00}$ | $0.0 \times 10^{00}$ | $0.0 \times 10^{00}$ | $0.0 \times 10^{00}$ | $5.3 \times 10^{16}$ |
| Heilongjiang   | Northeastern | $4.1 \times 10^{18}$ | $1.6 \times 10^{21}$ | $3.2 \times 10^{19}$ | $1.6 \times 10^{17}$ | $1.2 \times 10^{17}$ | $7.6 \times 10^{16}$ | $2.1 \times 10^{18}$ | $1.1 \times 10^{13}$ | $0.0 \times 10^{00}$ | $0.0 \times 10^{00}$ | $0.0 \times 10^{00}$ | $3.0 \times 10^{15}$ | $2.5 \times 10^{16}$ |
| Shanghai       | Eastern      | $2.1 \times 10^{18}$ | $1.4 \times 10^{21}$ | $6.3 \times 10^{18}$ | $3.4 \times 10^{17}$ | $4.2 \times 10^{17}$ | $2.9 \times 10^{17}$ | $3.5 \times 10^{18}$ | $1.2 \times 10^{15}$ | $4.3 \times 10^{14}$ | $0.0 \times 10^{00}$ | $0.0 \times 10^{00}$ | $2.9 \times 10^{16}$ | $3.0 \times 10^{16}$ |
| Jiangsu        | Eastern      | $5.1 \times 10^{18}$ | $7.6 \times 10^{21}$ | $2.4 \times 10^{20}$ | $2.2 \times 10^{18}$ | $2.6 \times 10^{18}$ | $1.0 \times 10^{18}$ | $2.5 \times 10^{19}$ | $1.1 \times 10^{16}$ | $1.6 \times 10^{16}$ | $2.2 \times 10^{15}$ | $5.9 \times 10^{16}$ | $1.2 \times 10^{17}$ | $1.2 \times 10^{17}$ |
| Zhejiang       | Eastern      | $8.3 \times 10^{17}$ | $4.2 \times 10^{21}$ | $2.2 \times 10^{20}$ | $2.7 \times 10^{17}$ | $6.4 \times 10^{17}$ | $7.4 \times 10^{17}$ | $2.0 \times 10^{18}$ | $9.0 \times 10^{15}$ | $1.8 \times 10^{16}$ | $1.9 \times 10^{15}$ | $0.0 \times 10^{00}$ | $5.0 \times 10^{16}$ | $1.1 \times 10^{17}$ |
| Anhui          | Central      | $4.8 \times 10^{18}$ | $4.4 \times 10^{21}$ | $2.4 \times 10^{20}$ | $6.5 \times 10^{17}$ | $6.7 \times 10^{17}$ | $3.2 \times 10^{17}$ | $7.2 \times 10^{18}$ | $2.9 \times 10^{16}$ | $1.5 \times 10^{16}$ | $0.0 \times 10^{00}$ | $1.4 \times 10^{17}$ | $6.4 \times 10^{16}$ | $5.0 \times 10^{16}$ |
| Fujian         | Eastern      | $8.7 \times 10^{17}$ | $2.7 \times 10^{21}$ | $1.7 \times 10^{20}$ | $4.4 \times 10^{17}$ | $6.2 \times 10^{17}$ | $4.4 \times 10^{17}$ | $2.8 \times 10^{18}$ | $1.2 \times 10^{16}$ | $0.0 \times 10^{00}$ | $1.6 \times 10^{14}$ | $0.0 \times 10^{00}$ | $2.9 \times 10^{16}$ | $3.7 \times 10^{16}$ |
| Jiangxi        | Central      | $2.7 \times 10^{18}$ | $2.0 \times 10^{21}$ | $1.5 \times 10^{20}$ | $5.2 \times 10^{17}$ | $5.4 \times 10^{17}$ | $8.6 \times 10^{16}$ | $5.8 \times 10^{18}$ | $2.9 \times 10^{16}$ | $9.4 \times 10^{16}$ | $2.1 \times 10^{14}$ | $1.5 \times 10^{16}$ | $7.3 \times 10^{15}$ | $4.0 \times 10^{16}$ |
| Shandong       | Eastern      | $1.2 \times 10^{19}$ | $8.8 \times 10^{21}$ | $2.3 \times 10^{20}$ | $1.5 \times 10^{18}$ | $2.0 \times 10^{18}$ | $8.4 \times 10^{17}$ | $1.9 \times 10^{19}$ | $5.0 \times 10^{16}$ | $1.2 \times 10^{17}$ | $0.0 \times 10^{00}$ | $0.0 \times 10^{00}$ | $7.9 \times 10^{16}$ | $2.2 \times 10^{17}$ |
| Henan          | Central      | $7.2 \times 10^{18}$ | $4.3 \times 10^{21}$ | $2.0 \times 10^{20}$ | $6.1 \times 10^{17}$ | $7.7 \times 10^{17}$ | $1.6 \times 10^{17}$ | $6.8 \times 10^{18}$ | $1.1 \times 10^{16}$ | $1.6 \times 10^{16}$ | $1.0 \times 10^{15}$ | $1.0 \times 10^{17}$ | $5.2 \times 10^{16}$ | $6.1 \times 10^{16}$ |
| Hubei          | Central      | $3.1 \times 10^{18}$ | $2.1 \times 10^{21}$ | $1.9 \times 10^{20}$ | $6.4 \times 10^{17}$ | $7.7 \times 10^{17}$ | $3.1 \times 10^{17}$ | $6.5 \times 10^{18}$ | $1.3 \times 10^{16}$ | $2.4 \times 10^{16}$ | $0.0 \times 10^{00}$ | $3.9 \times 10^{16}$ | $1.8 \times 10^{16}$ | $3.1 \times 10^{16}$ |
| Hunan          | Central      | $2.3 \times 10^{18}$ | $1.5 \times 10^{21}$ | $1.7 \times 10^{20}$ | $4.8 \times 10^{17}$ | $5.0 \times 10^{17}$ | $2.4 \times 10^{17}$ | $5.4 \times 10^{18}$ | $0.0 \times 10^{00}$ | $1.6 \times 10^{16}$ | $8.4 \times 10^{15}$ | $1.4 \times 10^{16}$ | $1.3 \times 10^{16}$ | $4.6 \times 10^{16}$ |
| Guangdong      | Eastern      | $2.3 \times 10^{18}$ | $6.2 \times 10^{21}$ | $2.6 \times 10^{20}$ | $6.0 \times 10^{17}$ | $9.2 \times 10^{17}$ | $9.4 \times 10^{17}$ | $5.1 \times 10^{18}$ | $0.0 \times 10^{00}$ | $1.7 \times 10^{16}$ | $8.3 \times 10^{14}$ | $0.0 \times 10^{00}$ | $8.8 \times 10^{16}$ | $1.1 \times 10^{17}$ |
| Guangxi        | Western      | $3.1 \times 10^{18}$ | $1.8 \times 10^{21}$ | $1.8 \times 10^{20}$ | $4.7 \times 10^{17}$ | $6.1 \times 10^{17}$ | $1.2 \times 10^{17}$ | $7.5 \times 10^{18}$ | $1.9 \times 10^{16}$ | $0.0 \times 10^{00}$ | $1.2 \times 10^{15}$ | $3.4 \times 10^{15}$ | $1.2 \times 10^{16}$ | $8.8 \times 10^{16}$ |
| Hainan         | Eastern      | $0.0 \times 10^{00}$ | $3.7 \times 10^{20}$ | $2.8 \times 10^{19}$ | $0.0 \times 10^{00}$ | $0.0 \times 10^{00}$ | $1.0 \times 10^{17}$ | $0.0 \times 10^{00}$ | $4.2 \times 10^{15}$ |
| Chongqing      | Western      | $1.1 \times 10^{18}$ | $9.3 \times 10^{20}$ | $9.1 \times 10^{19}$ | $1.3 \times 10^{17}$ | $2.5 \times 10^{17}$ | $1.9 \times 10^{17}$ | $1.7 \times 10^{18}$ | $2.2 \times 10^{14}$ | $9.5 \times 10^{13}$ | $5.2 \times 10^{14}$ | $9.0 \times 10^{15}$ | $1.1 \times 10^{17}$ | $2.1 \times 10^{16}$ |
| Sichuan        | Western      | $4.2 \times 10^{18}$ | $9.1 \times 10^{20}$ | $2.2 \times 10^{20}$ | $5.0 \times 10^{17}$ | $6.1 \times 10^{17}$ | $4.2 \times 10^{17}$ | $5.2 \times 10^{18}$ | $3.8 \times 10^{12}$ | $0.0 \times 10^{00}$ | $5.4 \times 10^{14}$ | $0.0 \times 10^{00}$ | $5.9 \times 10^{15}$ | $1.1 \times 10^{17}$ |
| Guizhou        | Western      | $1.7 \times 10^{18}$ | $2.3 \times 10^{21}$ | $1.1 \times 10^{20}$ | $8.8 \times 10^{16}$ | $1.2 \times 10^{17}$ | $9.8 \times 10^{16}$ | $9.3 \times 10^{17}$ | $0.0 \times 10^{00}$ | $0.0 \times 10^{00}$ | $8.0 \times 10^{14}$ | $6.4 \times 10^{15}$ | $1.8 \times 10^{15}$ | $1.6 \times 10^{16}$ |
| Yunnan         | Western      | $4.2 \times 10^{18}$ | $7.1 \times 10^{20}$ | $1.7 \times 10^{20}$ | $4.0 \times 10^{17}$ | $4.1 \times 10^{17}$ | $1.9 \times 10^{17}$ | $4.3 \times 10^{18}$ | $2.1 \times 10^{16}$ | $8.9 \times 10^{15}$ | $1.1 \times 10^{16}$ | $4.6 \times 10^{14}$ | $6.7 \times 10^{15}$ | $6.5 \times 10^{16}$ |
| Tibet          | Western      | $0.0 \times 10^{00}$ | $7.1 \times 10^{18}$ | $1.4 \times 10^{19}$ | $0.0 \times 10^{00}$ | $0.0 \times 10^{00}$ | $2.2 \times 10^{16}$ | $0.0 \times 10^{00}$ | $3.2 \times 10^{14}$ | $0.0 \times 10^{00}$ | $0.0 \times 10^{00}$ | $0.0 \times 10^{00}$ | $0.0 \times 10^{00}$ | $2.4 \times 10^{13}$ |
| Shaanxi        | Western      | $1.9 \times 10^{19}$ | $3.5 \times 10^{21}$ | $1.1 \times 10^{20}$ | $2.5 \times 10^{17}$ | $3.0 \times 10^{17}$ | $0.0 \times 10^{00}$ | $2.8 \times 10^{18}$ | $5.4 \times 10^{13}$ | $0.0 \times 10^{00}$ | $1.3 \times 10^{16}$ | $0.0 \times 10^{00}$ | $4.9 \times 10^{15}$ | $4.9 \times 10^{16}$ |
| Gansu          | Western      | $2.0 \times 10^{18}$ | $1.5 \times 10^{21}$ | $6.9 \times 10^{19}$ | $1.7 \times 10^{17}$ | $1.8 \times 10^{17}$ | $8.2 \times 10^{16}$ | $2.0 \times 10^{18}$ | $1.4 \times 10^{16}$ | $8.9 \times 10^{15}$ | $0.0 \times 10^{00}$ | $0.0 \times 10^{00}$ | $2.0 \times 10^{15}$ | $3.8 \times 10^{16}$ |

|          |         |                      |                      |                      |                      |                      |                      |                      |                      |                      |                      |                      |                      |                      |
|----------|---------|----------------------|----------------------|----------------------|----------------------|----------------------|----------------------|----------------------|----------------------|----------------------|----------------------|----------------------|----------------------|----------------------|
| Qinghai  | Western | $7.1 \times 10^{17}$ | $1.8 \times 10^{20}$ | $1.7 \times 10^{19}$ | $2.9 \times 10^{16}$ | $3.1 \times 10^{16}$ | $0.0 \times 10^{00}$ | $3.8 \times 10^{17}$ | $8.2 \times 10^{14}$ | $0.0 \times 10^{00}$ | $0.0 \times 10^{00}$ | $3.1 \times 10^{14}$ | $1.2 \times 10^{16}$ | $2.6 \times 10^{16}$ |
| Ningxia  | Western | $3.6 \times 10^{18}$ | $2.6 \times 10^{21}$ | $2.8 \times 10^{19}$ | $5.3 \times 10^{16}$ | $5.6 \times 10^{16}$ | $3.8 \times 10^{16}$ | $1.1 \times 10^{18}$ | $0.0 \times 10^{00}$ | $0.0 \times 10^{00}$ | $5.7 \times 10^{14}$ | $0.0 \times 10^{00}$ | $2.0 \times 10^{15}$ | $2.5 \times 10^{16}$ |
| Xinjiang | Western | $8.7 \times 10^{18}$ | $5.6 \times 10^{21}$ | $6.6 \times 10^{19}$ | $2.4 \times 10^{17}$ | $2.8 \times 10^{17}$ | $1.2 \times 10^{16}$ | $2.8 \times 10^{18}$ | $4.4 \times 10^{15}$ | $0.0 \times 10^{00}$ | $0.0 \times 10^{00}$ | $0.0 \times 10^{00}$ | $0.0 \times 10^{00}$ | $7.2 \times 10^{16}$ |

## Reference

1. Yang Q., et al. Atmospheric emissions of respirable quartz from industrial activities in China. *Nat. Sustain.*, 2024.
2. Ministry of Environment of the People's Republic of China. Technical guidelines for risk assessment of soil contamination of land for construction (2019).
