# Supplementary material for: Atmospheric emissions of Ti-containing nanoparticles from industrial activities in China
Source: Royal Society of Chemistry journal article supplement (doi:10.1039/d4en00347k), 2024-01-01
Supplement: d4en00347k3.xlsx [file d4en00347k3.xlsx]

## Sheet: Sheet1
Index_BFI1	TimeStamp_BFI1	Ti_BFI1	Index_BFI2	TimeStamp_BFI2	Ti_BFI2	Index_BFI3	TimeStamp_BFI3	Ti_BFI3	Index_BFI4	TimeStamp_BFI4	Ti_BFI4	Index_BFI5	TimeStamp_BFI5	Ti_BFI5	Index_BFI6	TimeStamp_BFI6	Ti_BFI6	Index_CFPP-10	TimeStamp_CFPP-10	Ti_CFPP-10	Index_CFPP-11	TimeStamp_CFPP-11	Ti_CFPP-11	Index_CFPP-12	TimeStamp_CFPP-12	Ti_CFPP-12	Index_CFPP-13	TimeStamp_CFPP-13	Ti_CFPP-13	Index_CFPP-14	TimeStamp_CFPP-14	Ti_CFPP-14	Index_CFPP-15	TimeStamp_CFPP-15	Ti_CFPP-15	Index_CFPP-1	TimeStamp_CFPP-1	Ti_CFPP-1	Index_CFPP-2	TimeStamp_CFPP-2	Ti_CFPP-2	Index_CFPP-3	TimeStamp_CFPP-3	Ti_CFPP-3	Index_CFPP-4	TimeStamp_CFPP-4	Ti_CFPP-4	Index_CFPP-5	TimeStamp_CFPP-5
7	0.0209	0	6	0.0179	0	75	0.2243	0	6	0.0179	0	18	0.0538	0	2	0.006	0	37	0.1106	0	70	0.2093	1.328e-15	29	0.0867	0	73	0.2183	8.271e-16	91	0.2721	0	153	0.4575	0	10	0.0299	0	113	0.3379	0	11	0.0329	0	245	0.7326	0	250	0.7475
21	0.0628	0	76	0.2272	0	84	0.2512	0	13	0.0389	0	63	0.1884	0	32	0.0957	0	46	0.1375	0	128	0.3827	0	55	0.1645	0	111	0.3319	2.874e-15	141	0.4216	0	353	1.0555	0	12	0.0359	0	594	1.7761	4.151e-16	25	0.0747	0	354	1.0585	0	488	1.4591
38	0.1136	0	342	1.0226	0	115	0.3438	0	29	0.0867	0	77	0.2302	0	83	0.2482	0	49	0.1465	0	200	0.598	0	88	0.2631	0	277	0.8282	4.312e-16	175	0.5232	0	558	1.6684	0	18	0.0538	0	1094	3.2711	8.244e-16	40	0.1196	0	1554	4.6465	0	719	2.1498
40	0.1196	0	391	1.1691	0	144	0.4306	0	32	0.0957	0	136	0.4066	0	93	0.2781	0	59	0.1764	0	226	0.6757	0	90	0.2691	0	316	0.9448	0	374	1.1183	0	1317	3.9378	0	25	0.0747	7.059e-16	1287	3.8481	1.931e-14	54	0.1615	0	2692	8.0491	0	891	2.6641
49	0.1465	0	401	1.199	0	147	0.4395	0	55	0.1645	0	254	0.7595	0	119	0.3558	0	64	0.1914	0	228	0.6817	0	121	0.3618	0	339	1.0136	0	419	1.2528	0	1667	4.9843	0	26	0.0777	0	1330	3.9767	1.405e-15	74	0.2213	0	2841	8.4946	4.205e-16	1002	2.996
88	0.2631	0	408	1.2199	0	174	0.5203	0	60	0.1794	0	501	1.498	9.308e-15	129	0.3857	0	73	0.2183	0	235	0.7026	0	201	0.601	0	353	1.0555	0	565	1.6894	0	1704	5.095	0	30	0.0897	0	1652	4.9395	0	84	0.2512	0	2889	8.6381	0	1041	3.1126
95	0.2841	0	484	1.4472	0	185	0.5532	0	65	0.1943	0	537	1.6056	1.73e-15	141	0.4216	0	85	0.2541	0	236	0.7056	3.9e-16	250	0.7475	0	367	1.0973	0	1278	3.8212	0	2979	8.9072	0	35	0.1047	0	1722	5.1488	8.55e-16	87	0.2601	0	2905	8.686	4.108e-16	1059	3.1664
98	0.293	0	509	1.5219	0	233	0.6967	0	180	0.5382	0	651	1.9465	0	381	1.1392	0	88	0.2631	0	280	0.8372	0	257	0.7684	0	371	1.1093	0	1487	4.4461	0	3028	9.0537	0	38	0.1136	0	2089	6.2461	0	92	0.2751	0	3361	10.0494	0	1082	3.2352
108	0.3229	0	520	1.5548	0	239	0.7146	0	339	1.0136	0	808	2.4159	0	399	1.193	0	148	0.4425	0	289	0.8641	0	403	1.205	0	452	1.3515	0	1678	5.0172	0	3029	9.0567	0	43	0.1286	0	2156	6.4464	0	133	0.3977	0	3399	10.163	0	1124	3.3608
117	0.3498	0	646	1.9315	0	385	1.1512	0	352	1.0525	0	843	2.5206	0	403	1.205	0	151	0.4515	0	309	0.9239	0	421	1.2588	0	514	1.5369	0	2000	5.98	0	3051	9.1225	0	71	0.2123	8.324e-16	2620	7.8338	0	257	0.7684	0	3760	11.2424	0	1130	3.3787
125	0.3738	0	661	1.9764	0	390	1.1661	0	379	1.1332	0	1367	4.0873	0	408	1.2199	0	191	0.5711	0	373	1.1153	1.759e-15	443	1.3246	0	522	1.5608	0	2511	7.5079	0	3089	9.2361	0	99	0.296	0	2972	8.8863	0	312	0.9329	0	3999	11.957	6.819e-16	1145	3.4236
160	0.4784	0	704	2.105	0	410	1.2259	0	435	1.3007	0	1405	4.2009	0	484	1.4472	0	196	0.586	0	379	1.1332	0	462	1.3814	4.942e-16	554	1.6565	0	2522	7.5408	0	3095	9.254	0	108	0.3229	0	3120	9.3288	0	347	1.0375	0	4122	12.3248	0	1167	3.4893
179	0.5352	0	706	2.1109	0	473	1.4143	0	436	1.3036	0	1410	4.2159	6.106e-15	507	1.5159	0	253	0.7565	0	434	1.2977	0	504	1.507	0	585	1.7491	0	3053	9.1285	0	3916	11.7088	0	110	0.3289	0	3282	9.8132	0	380	1.1362	0	4355	13.0214	5.596e-16	1211	3.6209
201	0.601	0	734	2.1947	0	484	1.4472	0	641	1.9166	0	1491	4.4581	0	557	1.6654	0	340	1.0166	0	462	1.3814	2.658e-15	672	2.0093	7.6e-15	623	1.8628	0	3138	9.3826	0	4726	14.1307	0	112	0.3349	3.911e-16	3289	9.8341	0	410	1.2259	0	4457	13.3264	0	1227	3.6687
230	0.6877	0	745	2.2275	0	494	1.4771	0	673	2.0123	0	1767	5.2833	0	599	1.791	0	370	1.1063	0	463	1.3844	0	683	2.0422	0	669	2.0003	0	3298	9.861	0	5019	15.0068	0	117	0.3498	0	3326	9.9447	0	486	1.4531	0	4613	13.7929	0	1231	3.6807
237	0.7086	0	751	2.2455	0	511	1.5279	0	821	2.4548	0	1841	5.5046	1.301e-15	620	1.8538	0	374	1.1183	0	477	1.4262	0	720	2.1528	0	696	2.081	0	3549	10.6115	0	5299	15.844	0	119	0.3558	0	3678	10.9972	0	495	1.4801	0	4650	13.9035	4.5e-16	1282	3.8332
245	0.7326	0	756	2.2604	0	518	1.5488	0	825	2.4668	0	1973	5.8993	0	628	1.8777	0	375	1.1213	4.514e-16	479	1.4322	0	723	2.1618	0	698	2.087	4.494e-16	3559	10.6414	6.875e-16	5738	17.1566	0	129	0.3857	0	3749	11.2095	0	505	1.51	0	4829	14.4387	0	1445	4.3205
289	0.8641	0	793	2.3711	0	584	1.7462	0	829	2.4787	0	2106	6.2969	0	645	1.9285	0	390	1.1661	0	560	1.6744	0	728	2.1767	0	728	2.1767	0	3661	10.9464	0	5762	17.2284	0	130	0.3887	5.647e-16	4180	12.4982	9.318e-16	531	1.5877	0	5160	15.4284	0	1679	5.0202
291	0.8701	0	1117	3.3398	0	655	1.9585	0	868	2.5953	0	2212	6.6139	0	722	2.1588	0	442	1.3216	0	567	1.6953	0	750	2.2425	0	732	2.1887	0	3727	11.1437	0	6371	19.0493	0	139	0.4156	0	4192	12.5341	0	538	1.6086	0	5555	16.6094	9.047e-16	1791	5.3551
292	0.8731	0	1212	3.6239	0	697	2.084	0	887	2.6521	0	2239	6.6946	0	788	2.3561	0	484	1.4472	0	573	1.7133	0	790	2.3621	0	749	2.2395	0	3783	11.3112	0	6699	20.03	0	140	0.4186	1.148e-14	4197	12.549	0	581	1.7372	0	6343	18.9656	0	2908	8.6949
296	0.885	0	1266	3.7853	0	719	2.1498	0	910	2.7209	0	2249	6.7245	0	796	2.38	0	524	1.5668	0	576	1.7222	0	812	2.4279	0	805	2.407	0	3829	11.4487	0	7117	21.2798	0	154	0.4605	0	4237	12.6686	1.434e-15	596	1.782	0	6865	20.5264	4.205e-16	3337	9.9776
297	0.888	0	1268	3.7913	0	777	2.3232	0	954	2.8525	0	2261	6.7604	0	802	2.398	0	530	1.5847	0	646	1.9315	6.426e-16	897	2.682	0	840	2.5116	0	3950	11.8105	0	7512	22.4609	0	157	0.4694	3.307e-15	4470	13.3653	0	622	1.8598	0	6934	20.7327	0	3693	11.0421
320	0.9568	0	1289	3.8541	0	811	2.4249	0	969	2.8973	0	2302	6.883	0	836	2.4996	0	561	1.6774	0	683	2.0422	0	1023	3.0588	0	881	2.6342	0	4345	12.9916	0	7667	22.9243	0	168	0.5023	0	4501	13.458	0	660	1.9734	0	7068	21.1333	0	3906	11.6789
321	0.9598	0	1535	4.5896	0	867	2.5923	0	978	2.9242	0	2324	6.9488	0	881	2.6342	0	573	1.7133	0	688	2.0571	0	1170	3.4983	0	917	2.7418	0	4824	14.4238	0	7684	22.9752	0	184	0.5502	0	4760	14.2324	6.785e-16	670	2.0033	0	7913	23.6599	4.706e-16	4158	12.4324
329	0.9837	0	1628	4.8677	0	891	2.6641	0	985	2.9451	0	2372	7.0923	0	1083	3.2382	0	608	1.8179	0	719	2.1498	0	1186	3.5461	0	1163	3.4774	0	4851	14.5045	0	7881	23.5642	0	186	0.5561	1.141e-15	4897	14.642	7.32e-16	692	2.0691	0	8311	24.8499	0	4800	14.352
364	1.0884	0	2068	6.1833	0	907	2.7119	0	1015	3.0349	0	2402	7.182	8.752e-16	1099	3.286	0	615	1.8389	0	728	2.1767	0	1194	3.5701	0	1199	3.585	0	5046	15.0875	0	7900	23.621	0	198	0.592	7.019e-16	5138	15.3626	2.085e-15	704	2.105	7.308e-16	8688	25.9771	0	5607	16.7649
381	1.1392	0	2077	6.2102	0	969	2.8973	0	1075	3.2142	0	2409	7.2029	0	1140	3.4086	0	638	1.9076	0	758	2.2664	0	1218	3.6418	0	1231	3.6807	0	5087	15.2101	0	7985	23.8752	0	213	0.6369	0	5179	15.4852	0	715	2.1378	5.351e-16	10223	30.5668	4.299e-16	6150	18.3885
392	1.1721	0	2196	6.566	0	1029	3.0767	0	1079	3.2262	0	2477	7.4062	0	1160	3.4684	0	642	1.9196	0	778	2.3262	1.543e-14	1361	4.0694	0	1292	3.8631	0	5121	15.3118	0	8994	26.8921	0	214	0.6399	1.554e-15	5225	15.6227	8.901e-16	738	2.2066	4.261e-16	11167	33.3893	0	6187	18.4991
395	1.181	0	2243	6.7066	0	1064	3.1814	0	1151	3.4415	0	2504	7.487	0	1383	4.1352	0	648	1.9375	0	789	2.3591	1.662e-15	1400	4.186	0	1334	3.9887	0	5322	15.9128	0	9409	28.1329	0	229	0.6847	8.566e-16	5234	15.6497	5.89e-16	744	2.2246	0	11594	34.6661	0	6845	20.4666
401	1.199	0	2348	7.0205	0	1157	3.4594	0	1172	3.5043	0	2519	7.5318	0	1571	4.6973	0	706	2.1109	0	796	2.38	0	1416	4.2338	0	1391	4.1591	0	5358	16.0204	0	9565	28.5994	0	238	0.7116	4.026e-16	5369	16.0533	0	754	2.2545	0	12055	36.0444	0	7364	22.0184
411	1.2289	0	2391	7.1491	0	1369	4.0933	0	1255	3.7525	0	2562	7.6604	1.2e-15	1578	4.7182	0	713	2.1319	0	803	2.401	0	1519	4.5418	0	1476	4.4132	0	5496	16.433	0	9595	28.6891	0	239	0.7146	0	5503	16.454	0	765	2.2873	0	12109	36.2059	0	7509	22.4519
428	1.2797	0	2402	7.182	0	1411	4.2189	0	1324	3.9588	0	2630	7.8637	0	1597	4.775	0	753	2.2515	0	812	2.4279	0	1542	4.6106	0	1531	4.5777	0	5498	16.439	0	9906	29.6189	0	245	0.7326	0	5768	17.2463	0	772	2.3083	0	12162	36.3644	0	7699	23.02
440	1.3156	0	2436	7.2836	0	1482	4.4312	0	1406	4.2039	0	2649	7.9205	0	1613	4.8229	0	788	2.3561	0	921	2.7538	0	1615	4.8289	4.249e-16	1608	4.8079	0	5520	16.5048	0	10100	30.199	0	256	0.7654	0	6468	19.3393	0	778	2.3262	0	13691	40.9361	2.242e-15	8181	24.4612
448	1.3395	0	2458	7.3494	0	1603	4.793	0	1432	4.2817	0	2664	7.9654	0	1620	4.8438	0	834	2.4937	0	946	2.8285	4.418e-16	1634	4.8857	0	1646	4.9215	0	5579	16.6812	0	10109	30.2259	0	295	0.8821	0	6783	20.2812	3.238e-15	824	2.4638	0	14724	44.0248	5.042e-15	8280	24.7572
476	1.4232	0	2490	7.4451	0	1642	4.9096	0	1434	4.2877	0	2674	7.9953	0	1636	4.8916	0	846	2.5295	0	955	2.8554	0	1667	4.9843	0	1652	4.9395	0	5658	16.9174	0	10222	30.5638	0	298	0.891	0	7194	21.5101	0	862	2.5774	0	14725	44.0277	0	8379	25.0532
478	1.4292	0	2613	7.8129	0	1687	5.0441	0	1442	4.3116	0	2708	8.0969	0	1643	4.9126	0	866	2.5893	0	968	2.8943	7.142e-16	1715	5.1279	0	1685	5.0381	0	5727	17.1237	0	10314	30.8389	0	302	0.903	0	7530	22.5147	7.708e-16	914	2.7329	0	14906	44.5689	9.516e-16	8608	25.7379
489	1.4621	0	2644	7.9056	0	1698	5.077	0	1444	4.3176	0	2726	8.1507	0	1670	4.9933	0	880	2.6312	0	973	2.9093	0	1785	5.3372	1.484e-15	1718	5.1368	0	5734	17.1447	0	10377	31.0272	0	308	0.9209	0	8081	24.1622	0	1075	3.2142	0	15490	46.3151	0	9599	28.701
495	1.4801	0	2701	8.076	0	1813	5.4209	0	1472	4.4013	0	2735	8.1776	2.148e-15	1676	5.0112	0	906	2.7089	0	1019	3.0468	0	1841	5.5046	0	1751	5.2355	0	5999	17.937	0	10391	31.0691	0	338	1.0106	6.605e-15	9389	28.0731	6.766e-16	1078	3.2232	0	16061	48.0224	0	9750	29.1525
501	1.498	0	2735	8.1776	0	1840	5.5016	0	1550	4.6345	0	2761	8.2554	0	1726	5.1607	0	961	2.8734	0	1067	3.1903	0	1885	5.6361	0	1879	5.6182	0	6317	18.8878	0	11387	34.0471	0	341	1.0196	4.459e-16	9479	28.3422	0	1083	3.2382	0	16665	49.8284	0	10825	32.3668
539	1.6116	0	2863	8.5604	2.953e-14	1911	5.7139	0	1552	4.6405	0	2869	8.5783	0	1729	5.1697	0	971	2.9033	0	1074	3.2113	4.081e-16	1890	5.6511	0	1940	5.8006	0	6450	19.2855	0	11637	34.7946	0	345	1.0315	9.948e-15	9595	28.6891	0	1093	3.2681	0	16826	50.3097	4.226e-16	11562	34.5704
573	1.7133	0	2916	8.7188	0	2179	6.5152	0	1567	4.6853	0	2896	8.659	0	1737	5.1936	0	980	2.9302	0	1088	3.2531	0	1917	5.7318	0	2008	6.0039	0	6456	19.3034	0	12005	35.895	0	347	1.0375	0	10563	31.5834	1.681e-15	1107	3.3099	0	17052	50.9855	7.247e-16	12018	35.9338
579	1.7312	0	3176	9.4962	0	2235	6.6826	0	1574	4.7063	0	2920	8.7308	1.364e-15	1767	5.2833	0	985	2.9451	0	1114	3.3309	0	1968	5.8843	0	2032	6.0757	0	6482	19.3812	0	12183	36.4272	0	350	1.0465	3.841e-16	10853	32.4505	0	1126	3.3667	0	17151	51.2815	0	12460	37.2554
592	1.7701	0	3280	9.8072	0	2310	6.9069	0	1605	4.799	0	3078	9.2032	0	1883	5.6302	0	1007	3.0109	3.713e-15	1121	3.3518	0	2057	6.1504	1.07e-15	2087	6.2401	0	6775	20.2572	0	13217	39.5188	0	358	1.0704	4.204e-16	11090	33.1591	0	1154	3.4505	0	17772	53.1383	0	12803	38.281
608	1.8179	0	3332	9.9627	0	2656	7.9414	0	1611	4.8169	0	3241	9.6906	0	1968	5.8843	0	1010	3.0199	0	1169	3.4953	0	2398	7.17	0	2113	6.3179	1.03e-15	6842	20.4576	0	13224	39.5398	0	375	1.1213	4.661e-16	11167	33.3893	0	1176	3.5162	0	18103	54.128	0	12987	38.8311
686	2.0511	0	3427	10.2467	0	2713	8.1119	0	1614	4.8259	0	3291	9.8401	0	1973	5.8993	0	1023	3.0588	0	1271	3.8003	0	2471	7.3883	0	2115	6.3239	0	6935	20.7356	0	13234	39.5697	0	380	1.1362	0	11176	33.4162	0	1191	3.5611	0	18139	54.2356	0	14021	41.9228
705	2.108	0	3466	10.3633	0	2986	8.9281	0	1661	4.9664	0	3404	10.178	0	1980	5.9202	0	1073	3.2083	7.548e-16	1302	3.893	0	2473	7.3943	0	2309	6.9039	0	7058	21.1034	0	13974	41.7823	0	386	1.1541	0	11711	35.0159	1.206e-15	1199	3.585	0	18493	55.2941	1.709e-15	14115	42.2039
709	2.1199	0	3480	10.4052	0	3127	9.3497	0	1675	5.0083	0	3546	10.6025	6.831e-16	2088	6.2431	1.202e-14	1121	3.3518	0	1324	3.9588	0	2644	7.9056	0	2362	7.0624	0	7280	21.7672	0	14021	41.9228	0	408	1.2199	7.974e-16	11737	35.0936	0	1235	3.6926	0	18584	55.5662	0	15154	45.3105
749	2.2395	0	3499	10.462	0	3183	9.5172	0	1683	5.0322	0	3806	11.3799	0	2217	6.6288	0	1130	3.3787	0	1409	4.2129	0	2722	8.1388	0	2411	7.2089	0	7481	22.3682	0	14029	41.9467	0	411	1.2289	7.759e-16	11778	35.2162	4.947e-16	1311	3.9199	0	19199	57.405	0	15470	46.2553
789	2.3591	0	3502	10.471	0	3206	9.5859	0	1746	5.2205	0	3858	11.5354	0	2264	6.7694	0	1145	3.4236	0	1411	4.2189	0	2747	8.2135	0	2609	7.8009	0	7513	22.4639	0	14285	42.7122	0	413	1.2349	0	11779	35.2192	0	1340	4.0066	0	19200	57.408	1.185e-15	16027	47.9207
817	2.4428	0	3512	10.5009	0	3360	10.0464	0	1759	5.2594	0	3885	11.6161	0	2267	6.7783	0	1179	3.5252	0	1434	4.2877	0	3029	9.0567	0	2641	7.8966	0	7663	22.9124	0	14608	43.6779	0	428	1.2797	2.177e-15	12032	35.9757	4.374e-16	1346	4.0245	0	19395	57.9911	4.933e-16	16107	48.1599
834	2.4937	0	3530	10.5547	0	3372	10.0823	0	1834	5.4837	0	4009	11.9869	0	2279	6.8142	0	1192	3.5641	0	1447	4.3265	3.754e-15	3037	9.0806	2.332e-15	2741	8.1956	0	7690	22.9931	0	14698	43.947	0	429	1.2827	0	12034	35.9817	0	1351	4.0395	0	19510	58.3349	0	16715	49.9779
836	2.4996	0	3537	10.5756	0	3376	10.0942	0	1854	5.5435	0	4080	12.1992	0	2288	6.8411	0	1203	3.597	0	1489	4.4521	0	3157	9.4394	3.675e-16	2759	8.2494	0	7750	23.1725	0	14887	44.5121	0	431	1.2887	0	12500	37.375	0	1355	4.0514	0	20317	60.7478	1.06e-15	16901	50.534
850	2.5415	0	3742	11.1886	0	3433	10.2647	0	1862	5.5674	0	4160	12.4384	0	2320	6.9368	0	1215	3.6328	0	1556	4.6524	0	3411	10.1989	0	2819	8.4288	4.243e-16	8000	23.92	6.376e-16	14907	44.5719	0	433	1.2947	0	12703	37.982	8.185e-16	1369	4.0933	0	20373	60.9153	2.473e-14	17004	50.842
853	2.5505	0	3913	11.6999	0	3468	10.3693	0	1923	5.7498	0	4384	13.1082	0	2375	7.1013	0	1232	3.6837	0	1571	4.6973	0	3535	10.5696	1.626e-15	2881	8.6142	0	8171	24.4313	0	15062	45.0354	0	440	1.3156	4.628e-16	13470	40.2753	0	1386	4.1441	0	20409	61.0229	0	17137	51.2396
875	2.6162	0	3931	11.7537	0	3557	10.6354	0	1930	5.7707	0	4435	13.2607	0	2394	7.1581	0	1255	3.7525	0	1574	4.7063	0	3604	10.776	0	2947	8.8115	5.053e-16	8283	24.7662	0	15189	45.4151	0	457	1.3664	0	13652	40.8195	0	1418	4.2398	0	20444	61.1276	0	17265	51.6223
887	2.6521	0	3936	11.7686	0	3563	10.6534	0	1946	5.8185	0	4442	13.2816	0	2408	7.1999	0	1265	3.7824	0	1583	4.7332	2.309e-15	3656	10.9314	0	2973	8.8893	0	8387	25.0771	0	15770	47.1523	0	465	1.3903	0	13694	40.9451	1.241e-14	1462	4.3714	0	20495	61.2801	0	17709	52.9499
899	2.688	0	4024	12.0318	0	3587	10.7251	0	2012	6.0159	0	4591	13.7271	0	2429	7.2627	0	1279	3.8242	0	1587	4.7451	0	3677	10.9942	2.708e-15	3026	9.0477	0	8455	25.2805	0	16516	49.3828	0	476	1.4232	0	13912	41.5969	0	1546	4.6225	0	20865	62.3864	0	17887	53.4821
910	2.7209	0	4034	12.0617	0	3598	10.758	0	2046	6.1175	0	4593	13.7331	0	2455	7.3404	0	1285	3.8422	0	1634	4.8857	7.731e-16	3735	11.1677	4.926e-15	3041	9.0926	4.989e-16	8485	25.3701	0	16602	49.64	0	481	1.4382	0	14143	42.2876	0	1576	4.7122	0	20866	62.3893	0	18699	55.91
927	2.7717	0	4454	13.3175	0	3614	10.8059	0	2128	6.3627	0	4619	13.8108	4.664e-15	2468	7.3793	0	1319	3.9438	0	1657	4.9544	0	3847	11.5025	0	3087	9.2301	0	8534	25.5167	0	16725	50.0078	0	489	1.4621	5.384e-16	15191	45.4211	4.921e-16	1586	4.7421	0	21358	63.8604	0	18789	56.1791
962	2.8764	0	4649	13.9005	0	3714	11.1049	0	2237	6.6886	0	4665	13.9483	0	2474	7.3973	0	1324	3.9588	0	1680	5.0232	0	3863	11.5504	0	3088	9.2331	6.163e-16	8617	25.7648	0	16874	50.4533	0	490	1.4651	0	15304	45.759	0	1617	4.8348	0	21909	65.5079	8.613e-16	18909	56.5379
1002	2.996	0	4696	14.041	0	3751	11.2155	0	2389	7.1431	0	4740	14.1726	0	2476	7.4032	0	1440	4.3056	0	1683	5.0322	0	3881	11.6042	0	3114	9.3109	0	8646	25.8515	5.683e-16	16937	50.6416	0	491	1.4681	0	15391	46.0191	0	1672	4.9993	0	22090	66.0491	8.613e-16	19019	56.8668
1007	3.0109	0	4889	14.6181	0	3793	11.3411	0	2548	7.6185	0	4744	14.1846	0	2482	7.4212	0	1506	4.5029	0	1821	5.4448	0	3896	11.649	6.873e-16	3118	9.3228	0	8691	25.9861	0	17049	50.9765	0	493	1.4741	5.973e-16	15471	46.2583	0	1674	5.0053	0	22432	67.0717	1.592e-14	19306	57.7249
1032	3.0857	0	4998	14.944	0	3820	11.4218	0	2573	7.6933	0	4762	14.2384	0	2501	7.478	0	1536	4.5926	0	1880	5.6212	0	4016	12.0078	0	3181	9.5112	0	8788	26.2761	3.115e-15	17142	51.2546	0	497	1.486	0	15709	46.9699	7.171e-16	1698	5.077	0	23570	70.4743	0	19764	59.0944
1035	3.0947	0	5077	15.1802	0	3830	11.4517	0	2602	7.78	0	4821	14.4148	0	2547	7.6155	0	1548	4.6285	0	1883	5.6302	0	4047	12.1005	0	3183	9.5172	0	8923	26.6798	0	17194	51.4101	0	522	1.5608	6.79e-16	16214	48.4799	1.829e-15	1714	5.1249	0	23699	70.86	0	20177	60.3292
1039	3.1066	0	5245	15.6826	0	3902	11.667	0	2624	7.8458	0	4861	14.5344	0	2562	7.6604	0	1659	4.9604	0	1896	5.669	0	4053	12.1185	1.969e-15	3290	9.8371	0	9117	27.2598	0	17350	51.8765	0	524	1.5668	2.692e-15	16367	48.9373	4.761e-15	1750	5.2325	0	23984	71.7122	0	20198	60.392
1053	3.1485	0	5280	15.7872	0	3934	11.7627	0	2640	7.8936	0	5420	16.2058	0	2608	7.7979	0	1685	5.0381	0	1902	5.687	0	4145	12.3935	0	3388	10.1301	0	9215	27.5528	0	18113	54.1579	0	553	1.6535	0	16477	49.2662	1.908e-15	1776	5.3102	0	24104	72.071	0	20351	60.8495
1059	3.1664	0	5316	15.8948	0	4212	12.5939	0	2718	8.1268	0	5595	16.7291	0	2668	7.9773	0	1697	5.074	0	1974	5.9023	0	4205	12.573	0	3432	10.2617	0	9237	27.6186	0	18147	54.2595	0	560	1.6744	0	16741	50.0556	0	1787	5.3431	0	25262	75.5334	0	20419	61.0528
1135	3.3937	0	5408	16.1699	0	4306	12.8749	0	2810	8.4019	0	5610	16.7739	0	2692	8.0491	0	1722	5.1488	0	1979	5.9172	0	4298	12.851	0	3492	10.4411	0	9431	28.1987	0	18185	54.3732	0	574	1.7163	0	16950	50.6805	0	1820	5.4418	0	25600	76.544	0	21321	63.7498
1146	3.4265	0	5454	16.3075	0	4481	13.3982	0	2851	8.5245	0	5615	16.7889	0	2750	8.2225	0	1729	5.1697	0	1998	5.974	3.735e-16	4381	13.0992	0	3495	10.4501	0	9494	28.3871	0	18725	55.9877	0	590	1.7641	0	17737	53.0336	1.343e-15	1892	5.6571	0	26066	77.9373	0	21363	63.8754
1147	3.4295	0	5464	16.3374	0	4491	13.4281	0	2886	8.6291	0	5828	17.4257	0	2755	8.2375	0	1746	5.2205	0	2006	5.9979	0	4485	13.4101	0	3658	10.9374	0	9719	29.0598	0	19714	58.9449	0	610	1.8239	0	17762	53.1084	0	1916	5.7288	0	26234	78.4397	0	21398	63.98
1154	3.4505	0	5470	16.3553	0	4580	13.6942	0	2900	8.671	0	5865	17.5363	0	2786	8.3301	0	1791	5.3551	0	2012	6.0159	0	4581	13.6972	0	3772	11.2783	0	9815	29.3468	4.331e-16	19844	59.3336	0	621	1.8568	1.02e-15	17797	53.213	0	1918	5.7348	0	26334	78.7387	0	21416	64.0338
1171	3.5013	0	5840	17.4616	0	4602	13.76	0	2962	8.8564	0	5869	17.5483	0	2841	8.4946	0	1827	5.4627	0	2014	6.0219	0	4620	13.8138	0	3830	11.4517	0	10199	30.495	0	19866	59.3993	0	623	1.8628	0	17925	53.5958	0	1982	5.9262	0	28124	84.0908	0	21452	64.1415
1181	3.5312	0	6296	18.825	0	4680	13.9932	0	2999	8.967	0	5871	17.5543	0	2866	8.5693	0	1869	5.5883	0	2043	6.1086	2.019e-15	4669	13.9603	0	3861	11.5444	0	10286	30.7551	0	20040	59.9196	0	629	1.8807	4.696e-15	18031	53.9127	1.807e-15	2001	5.983	0	28961	86.5934	0	21489	64.2521
1187	3.5491	0	6412	19.1719	0	4733	14.1517	0	3086	9.2271	0	6218	18.5918	0	2894	8.6531	0	1889	5.6481	0	2064	6.1714	0	4693	14.0321	5.502e-16	3889	11.6281	0	10328	30.8807	0	20337	60.8076	0	634	1.8957	0	18056	53.9874	0	2021	6.0428	0	28962	86.5964	0	21490	64.2551
1195	3.573	0	6582	19.6802	0	4902	14.657	0	3129	9.3557	0	6255	18.7024	3.311e-15	2928	8.7547	0	1917	5.7318	0	2083	6.2282	0	4760	14.2324	0	3948	11.8045	0	10459	31.2724	0	20468	61.1993	0	640	1.9136	5.265e-15	18116	54.1668	0	2052	6.1355	0	29133	87.1077	0	21498	64.279
1210	3.6179	0	6641	19.8566	0	5086	15.2071	0	3241	9.6906	0	6267	18.7383	0	2963	8.8594	0	2061	6.1624	0	2093	6.2581	0	4826	14.4297	0	3994	11.9421	5.221e-16	10706	32.0109	0	20601	61.597	0	648	1.9375	0	18121	54.1818	0	2058	6.1534	0	29492	88.1811	0	21519	64.3418
1245	3.7226	0	6782	20.2782	0	5225	15.6227	0	3243	9.6966	0	6296	18.825	0	2975	8.8953	0	2096	6.267	7.098e-16	2111	6.3119	0	4834	14.4537	0	4115	12.3039	0	10916	32.6388	0	21028	62.8737	0	655	1.9585	9.05e-16	18315	54.7619	0	2076	6.2072	0	29840	89.2216	0	21629	64.6707
1270	3.7973	0	7098	21.223	0	5343	15.9756	0	3245	9.7026	0	6322	18.9028	2.058e-15	3030	9.0597	0	2103	6.288	0	2119	6.3358	0	4854	14.5135	0	4179	12.4952	8.509e-16	10940	32.7106	3.566e-15	23001	68.773	0	671	2.0063	0	18486	55.2731	0	2078	6.2132	0	29859	89.2784	0	21644	64.7156
1273	3.8063	0	7152	21.3845	0	5400	16.146	0	3298	9.861	0	6324	18.9088	0	3159	9.4454	0	2113	6.3179	0	2125	6.3537	0	4861	14.5344	0	4203	12.567	5.108e-15	11454	34.2475	0	23296	69.655	0	683	2.0422	0	19888	59.4651	2.735e-15	2145	6.4135	0	29974	89.6223	0	21645	64.7186
1276	3.8152	0	7209	21.5549	0	5565	16.6394	0	3328	9.9507	0	6413	19.1749	0	3195	9.5531	0	2118	6.3328	0	2132	6.3747	4.594e-16	4911	14.6839	0	4208	12.5819	4.005e-16	11486	34.3431	0	23321	69.7298	0	706	2.1109	0	20715	61.9378	0	2169	6.4853	0	30216	90.3458	0	21650	64.7335
1310	3.9169	0	7230	21.6177	0	5790	17.3121	0	3340	9.9866	0	6520	19.4948	0	3228	9.6517	0	2263	6.7664	0	2159	6.4554	0	5024	15.0218	0	4219	12.6148	0	11493	34.3641	0	24208	72.3819	0	712	2.1289	0	21198	63.382	0	2173	6.4973	0	31766	94.9803	0	21653	64.7425
1322	3.9528	0	7318	21.8808	0	5807	17.3629	0	3400	10.166	0	6566	19.6323	0	3242	9.6936	0	2274	6.7993	0	2206	6.5959	0	5080	15.1892	9.37e-15	4355	13.0214	0	11526	34.4627	0	24231	72.4507	0	714	2.1349	1.646e-15	21328	63.7707	0	2195	6.5631	0	31840	95.2016	0	21675	64.8083
1338	4.0006	0	7359	22.0034	0	5911	17.6739	0	3442	10.2916	0	6645	19.8685	0	3251	9.7205	0	2332	6.9727	0	2219	6.6348	0	5110	15.2789	0	4380	13.0962	0	11570	34.5943	0	24255	72.5225	0	719	2.1498	7.634e-16	21448	64.1295	0	2208	6.6019	0	31973	95.5993	1.484e-15	21723	64.9518
1357	4.0574	0	7364	22.0184	0	5944	17.7726	0	3572	10.6803	0	6702	20.039	0	3320	9.9268	0	2341	6.9996	0	2263	6.7664	0	5187	15.5091	0	4512	13.4909	0	11633	34.7827	0	24387	72.9171	0	743	2.2216	1.102e-15	21709	64.9099	2.271e-15	2225	6.6528	0	31974	95.6023	0	21733	64.9817
1362	4.0724	0	7398	22.12	0	5952	17.7965	0	3672	10.9793	0	6813	20.3709	0	3374	10.0883	0	2349	7.0235	8.074e-16	2289	6.8441	0	5209	15.5749	0	4552	13.6105	0	11676	34.9112	0	24441	73.0786	0	760	2.2724	0	21824	65.2538	0	2244	6.7096	0	32265	96.4724	0	21742	65.0086
1380	4.1262	0	7516	22.4728	0	6277	18.7682	0	3784	11.3142	0	6878	20.5652	0	3388	10.1301	0	2359	7.0534	0	2304	6.889	0	5260	15.7274	0	4596	13.742	0	11809	35.3089	0	24578	73.4882	0	764	2.2844	0	21995	65.7651	0	2269	6.7843	0	32463	97.0644	0	21744	65.0146
1392	4.1621	0	7677	22.9542	1.468e-14	6314	18.8789	0	3816	11.4098	0	6964	20.8224	0	3396	10.154	0	2373	7.0953	0	2356	7.0444	0	5268	15.7513	0	4722	14.1188	0	12054	36.0415	9.088e-16	25055	74.9145	0	766	2.2903	1.792e-15	22001	65.783	0	2314	6.9189	0	32631	97.5667	7.069e-16	21758	65.0564
1429	4.2727	0	7678	22.9572	0	6373	19.0553	0	4112	12.2949	0	6972	20.8463	0	3415	10.2109	0	2388	7.1401	0	2383	7.1252	0	5353	16.0055	0	4836	14.4596	6.013e-16	12063	36.0684	0	25358	75.8204	0	769	2.2993	0	22698	67.867	0	2352	7.0325	0	32766	97.9703	0	21760	65.0624
1442	4.3116	0	7685	22.9781	0	6399	19.133	0	4167	12.4593	0	7014	20.9719	0	3469	10.3723	0	2402	7.182	0	2398	7.17	0	5380	16.0862	0	4839	14.4686	0	12249	36.6245	0	25479	76.1822	0	774	2.3143	4.617e-16	22921	68.5338	0	2361	7.0594	0	32795	98.0571	0	21770	65.0923
1448	4.3295	0	7688	22.9871	0	6510	19.4649	0	4176	12.4862	0	7031	21.0227	0	3494	10.4471	0	2429	7.2627	0	2406	7.1939	0	5440	16.2656	0	4855	14.5165	0	12311	36.8099	1.206e-15	25597	76.535	0	777	2.3232	1.028e-15	23379	69.9032	1.866e-14	2400	7.176	0	33016	98.7178	0	21784	65.1342
1452	4.3415	0	7701	23.026	0	6732	20.1287	0	4232	12.6537	0	7278	21.7612	0	3495	10.4501	0	2431	7.2687	0	2427	7.2567	0	5539	16.5616	1.048e-15	4867	14.5523	0	12920	38.6308	0	25688	76.8071	0	782	2.3382	0	23680	70.8032	0	2406	7.1939	0	33347	99.7075	0	21810	65.2119
1481	4.4282	0	7812	23.3579	0	6738	20.1466	0	4351	13.0095	3.396e-15	7326	21.9047	1.911e-15	3511	10.4979	0	2439	7.2926	0	2437	7.2866	0	5556	16.6124	1.336e-14	4901	14.654	0	12960	38.7504	0	25884	77.3932	0	788	2.3561	0	23684	70.8152	0	2470	7.3853	0	34049	101.806	0	21822	65.2478
1526	4.5627	0	7955	23.7855	0	6780	20.2722	0	4818	14.4058	0	7525	22.4997	0	3560	10.6444	0	2449	7.3225	0	2442	7.3016	0	5628	16.8277	0	5043	15.0786	0	13257	39.6384	0	25923	77.5098	0	793	2.3711	1.189e-15	23719	70.9198	0	2533	7.5737	0	34057	101.83	0	21827	65.2627
1536	4.5926	0	7966	23.8183	0	7124	21.3008	0	4873	14.5703	0	7656	22.8914	0	3582	10.7102	0	2455	7.3404	0	2466	7.3733	1.834e-15	5686	17.0011	0	5159	15.4254	0	13539	40.4816	5.671e-16	25942	77.5666	0	805	2.407	1.389e-15	23738	70.9766	0	2678	8.0072	0	34280	102.497	0	21831	65.2747
1544	4.6166	0	7973	23.8393	0	7166	21.4263	0	4934	14.7527	0	7828	23.4057	0	3698	11.057	0	2469	7.3823	0	2528	7.5587	0	5696	17.031	7.634e-16	5247	15.6885	0	13543	40.4936	0	26503	79.244	0	813	2.4309	0	23747	71.0035	0	2726	8.1507	0	34393	102.835	0	21862	65.3674
1558	4.6584	0	8006	23.9379	0	7178	21.4622	0	5011	14.9829	0	7871	23.5343	0	3778	11.2962	0	2517	7.5258	0	2533	7.5737	0	5698	17.037	0	5253	15.7065	0	13720	41.0228	0	26951	80.5835	0	836	2.4996	0	23767	71.0633	0	2734	8.1747	0	34479	103.092	0	21878	65.4152
1568	4.6883	0	8037	24.0306	0	7198	21.522	0	5019	15.0068	0	7993	23.8991	0	3813	11.4009	0	2522	7.5408	0	2599	7.771	0	5704	17.055	5.32e-16	5376	16.0742	0	14001	41.863	0	27176	81.2562	0	845	2.5265	0	23972	71.6763	0	2843	8.5006	0	35465	106.04	0	21912	65.5169
1576	4.7122	0	8084	24.1712	0	7264	21.7194	0	5069	15.1563	0	8120	24.2788	0	4094	12.2411	0	2535	7.5796	0	2641	7.8966	0	5725	17.1178	0	5506	16.4629	0	14028	41.9437	8.223e-16	27667	82.7243	0	849	2.5385	3.81e-16	24135	72.1637	0	2943	8.7996	0	35510	106.175	1.349e-15	21913	65.5199
1588	4.7481	0	8109	24.2459	0	7275	21.7523	1.137e-14	5164	15.4404	0	8125	24.2937	0	4107	12.2799	0	2578	7.7082	0	2655	7.9385	7.897e-16	5781	17.2852	8.7e-16	5518	16.4988	0	14043	41.9886	0	27997	83.711	0	853	2.5505	0	24326	72.7347	0	3015	9.0149	0	36221	108.301	0	21939	65.5976
1590	4.7541	0	8163	24.4074	0	7292	21.8031	0	5397	16.137	0	8130	24.3087	0	4118	12.3128	0	2586	7.7321	0	2660	7.9534	0	5814	17.3839	0	5719	17.0998	0	14051	42.0125	0	28534	85.3167	0	861	2.5744	0	24363	72.8454	0	3034	9.0717	0	36724	109.805	0	21953	65.6395
1600	4.784	0	8260	24.6974	0	7296	21.815	0	5421	16.2088	0	8139	24.3356	0	4137	12.3696	0	2630	7.8637	0	2667	7.9743	0	5940	17.7606	9.955e-16	5842	17.4676	0	14702	43.959	0	28896	86.399	0	865	2.5863	0	24455	73.1205	0	3059	9.1464	0	36762	109.918	0	21956	65.6484
1602	4.79	0	8337	24.9276	0	7373	22.0453	0	5441	16.2686	0	8176	24.4462	0	4195	12.5431	0	2641	7.8966	0	2740	8.1926	0	5953	17.7995	0	5850	17.4915	0	14703	43.962	7.631e-16	29082	86.9552	0	870	2.6013	0	24764	74.0444	8.352e-16	3086	9.2271	0	37550	112.275	0	21965	65.6753
1608	4.8079	0	8371	25.0293	0	7387	22.0871	0	5504	16.457	0	8180	24.4582	0	4199	12.555	0	2648	7.9175	0	2779	8.3092	0	6076	18.1672	0	5853	17.5005	0	14710	43.9829	0	29296	87.595	0	879	2.6282	0	24784	74.1042	0	3104	9.281	0	37674	112.645	6.058e-16	21971	65.6933
1612	4.8199	0	8386	25.0741	0	7661	22.9064	0	5520	16.5048	0	8190	24.4881	0	4314	12.8989	0	2662	7.9594	0	2845	8.5066	0	6172	18.4543	0	5870	17.5513	0	14750	44.1025	0	29321	87.6698	0	880	2.6312	4.641e-16	24837	74.2626	0	3119	9.3258	0	37878	113.255	0	21995	65.7651
1614	4.8259	0	8398	25.11	0	7725	23.0978	0	5539	16.5616	0	8206	24.5359	0	4360	13.0364	0	2710	8.1029	0	2907	8.6919	0	6244	18.6696	0	5937	17.7516	0	14849	44.3985	0	29768	89.0063	0	886	2.6491	0	24850	74.3015	0	3140	9.3886	0	38234	114.32	0	22028	65.8637
1621	4.8468	0	8485	25.3701	0	7748	23.1665	0	5542	16.5706	0	8212	24.5539	0	4500	13.455	0	2715	8.1179	6.499e-16	2911	8.7039	0	6317	18.8878	2.867e-15	6024	18.0118	0	14888	44.5151	0	29839	89.2186	0	896	2.679	4.419e-16	24942	74.5766	0	3151	9.4215	0	38559	115.291	2.349e-15	22039	65.8966
1623	4.8528	0	8488	25.3791	0	7792	23.2981	0	5562	16.6304	0	8214	24.5599	0	4505	13.47	0	2733	8.1717	0	2920	8.7308	0	6370	19.0463	0	6094	18.2211	4.093e-16	14921	44.6138	0	30081	89.9422	0	902	2.697	3.375e-15	25174	75.2703	0	3166	9.4663	0	38560	115.294	0	22046	65.9175
1630	4.8737	0	8558	25.5884	0	7820	23.3818	0	5584	16.6962	0	8220	24.5778	3.952e-15	4585	13.7091	0	2740	8.1926	0	2958	8.8444	0	6427	19.2167	5.325e-16	6295	18.8221	2.765e-15	14949	44.6975	0	30461	91.0784	0	907	2.7119	2.826e-15	25235	75.4527	0	3193	9.5471	2.04e-15	38978	116.544	0	22049	65.9265
1635	4.8887	0	8591	25.6871	0	7836	23.4296	0	5604	16.756	0	8228	24.6017	0	4602	13.76	0	2915	8.7158	0	2983	8.9192	0	6446	19.2735	0	6332	18.9327	0	15027	44.9307	0	30594	91.4761	0	915	2.7359	3.871e-16	25296	75.635	0	3229	9.6547	0	39024	116.682	7.706e-16	22052	65.9355
1645	4.9185	0	8612	25.7499	0	7944	23.7526	0	5612	16.7799	0	8240	24.6376	0	4611	13.7869	0	2996	8.958	0	3079	9.2062	0	6556	19.6024	0	6338	18.9506	0	15125	45.2238	0	31103	92.998	0	919	2.7478	0	25475	76.1702	0	3310	9.8969	0	39829	119.089	0	22063	65.9684
1659	4.9604	0	8684	25.9652	0	8095	24.204	0	5676	16.9712	0	8257	24.6884	0	4617	13.8048	0	3010	8.9999	0	3099	9.266	0	6558	19.6084	8.5e-16	6360	19.0164	0	15238	45.5616	0	31167	93.1893	0	946	2.8285	0	25481	76.1882	0	3367	10.0673	0	39946	119.439	0	22073	65.9983
1678	5.0172	0	9312	27.8429	0	8117	24.2698	0	5691	17.0161	0	8261	24.7004	0	4695	14.0381	0	3028	9.0537	0	3106	9.2869	0	6653	19.8925	0	6461	19.3184	0	15502	46.351	1.511e-15	31741	94.9056	0	949	2.8375	4.328e-16	25572	76.4603	0	3380	10.1062	5.762e-16	39982	119.546	1.128e-15	22109	66.1059
1709	5.1099	0	9354	27.9685	0	8134	24.3207	0	5720	17.1028	0	8264	24.7094	0	4704	14.065	0	3043	9.0986	2.472e-15	3108	9.2929	0	6715	20.0779	0	6481	19.3782	0	15622	46.7098	0	31848	95.2255	0	959	2.8674	0	25577	76.4752	0	3383	10.1152	0	40324	120.569	0	22119	66.1358
1723	5.1518	0	9373	28.0253	0	8554	25.5765	0	5766	17.2403	0	8303	24.826	0	4717	14.1038	0	3115	9.3139	0	3118	9.3228	0	6762	20.2184	1.9e-15	6528	19.5187	0	15627	46.7247	0	32675	97.6983	0	961	2.8734	3.834e-16	25653	76.7025	0	3386	10.1241	0	40349	120.644	0	22128	66.1627
1737	5.1936	0	9412	28.1419	0	8592	25.6901	0	5903	17.65	0	8320	24.8768	0	4731	14.1457	0	3122	9.3348	0	3137	9.3796	0	6787	20.2931	0	6665	19.9284	2.586e-15	15637	46.7546	0	32723	97.8418	0	963	2.8794	0	25671	76.7563	0	3407	10.1869	0	40477	121.026	5.357e-16	22185	66.3332
1740	5.2026	0	9414	28.1479	0	8721	26.0758	0	6087	18.2001	0	8334	24.9187	1.579e-15	4747	14.1935	0	3135	9.3736	0	3140	9.3886	0	6801	20.335	0	6667	19.9343	0	15693	46.9221	0	32859	98.2484	0	966	2.8883	0	25676	76.7712	0	3476	10.3932	0	41088	122.853	2.909e-15	22192	66.3541
1743	5.2116	0	9439	28.2226	0	8755	26.1775	0	6100	18.239	0	8337	24.9276	0	4810	14.3819	0	3175	9.4932	0	3168	9.4723	0	6879	20.5682	0	6710	20.0629	4.547e-16	15714	46.9849	0	32902	98.377	8.013e-16	988	2.9541	0	25689	76.8101	0	3490	10.4351	0	41089	122.856	0	22202	66.384
1749	5.2295	0	9516	28.4528	0	8760	26.1924	0	6109	18.2659	0	8346	24.9545	0	4859	14.5284	0	3178	9.5022	0	3184	9.5202	0	6982	20.8762	0	6772	20.2483	0	15722	47.0088	0	33182	99.2142	0	990	2.9601	0	25732	76.9387	0	3494	10.4471	0	41634	124.486	0	22207	66.3989
1751	5.2355	0	9566	28.6023	0	8897	26.602	0	6187	18.4991	0	8389	25.0831	0	4864	14.5434	0	3183	9.5172	9.594e-16	3189	9.5351	3.98e-15	7032	21.0257	1.356e-15	6788	20.2961	0	15744	47.0746	0	33384	99.8182	0	999	2.987	0	25769	77.0493	0	3515	10.5099	0	42307	126.498	0	22215	66.4228
1752	5.2385	0	9763	29.1914	0	8901	26.614	0	6201	18.541	0	8418	25.1698	0	4899	14.648	0	3196	9.556	0	3207	9.5889	0	7061	21.1124	0	6828	20.4157	0	15756	47.1104	0	33493	100.144	0	1001	2.993	0	25792	77.1181	0	3545	10.5996	0	42319	126.534	0	22224	66.4498
1759	5.2594	0	9839	29.4186	0	9005	26.9249	0	6216	18.5858	0	8422	25.1818	0	4904	14.663	0	3200	9.568	0	3233	9.6667	0	7124	21.3008	0	6857	20.5024	0	15792	47.2181	0	34175	102.183	0	1006	3.0079	0	25873	77.3603	0	3647	10.9045	0	42325	126.552	0	22236	66.4856
1779	5.3192	0	10156	30.3664	0	9032	27.0057	0	6239	18.6546	0	8451	25.2685	0	4990	14.9201	0	3243	9.6966	6.3e-15	3253	9.7265	0	7129	21.3157	0	6874	20.5533	0	15874	47.4633	0	34772	103.968	1.579e-15	1014	3.0319	0	25874	77.3633	0	3657	10.9344	0	42363	126.665	0	22239	66.4946
1807	5.4029	0	10599	31.691	0	9158	27.3824	0	6434	19.2377	0	8471	25.3283	0	5027	15.0307	0	3257	9.7384	0	3283	9.8162	0	7198	21.522	3.838e-16	6886	20.5891	0	16028	47.9237	0	35491	106.118	0	1017	3.0408	0	25913	77.4799	0	3690	11.0331	0	42367	126.677	0	22244	66.5096
1838	5.4956	0	10629	31.7807	0	9365	28.0013	0	6444	19.2676	0	8502	25.421	0	5076	15.1772	0	3323	9.9358	7.391e-16	3386	10.1241	0	7234	21.6297	0	6908	20.6549	0	16061	48.0224	0	35890	107.311	0	1031	3.0827	0	25925	77.5157	0	3703	11.072	0	42372	126.692	0	22255	66.5425
1874	5.6033	0	10740	32.1126	0	9387	28.0671	0	6540	19.5546	0	8598	25.708	0	5151	15.4015	0	3324	9.9388	0	3404	10.178	0	7237	21.6386	0	6929	20.7177	0	16194	48.4201	0	36115	107.984	0	1062	3.1754	4.284e-15	25937	77.5516	0	3737	11.1736	0	42394	126.758	0	22274	66.5993
1891	5.6541	0	10819	32.3488	0	9475	28.3302	0	6899	20.628	0	8741	26.1356	0	5167	15.4493	0	3384	10.1182	0	3419	10.2228	0	7302	21.833	0	6947	20.7715	0	16275	48.6623	0	36281	108.48	0	1082	3.2352	8.196e-16	25973	77.6593	0	3777	11.2932	0	42427	126.857	0	22283	66.6262
1943	5.8096	0	10839	32.4086	0	9494	28.3871	0	6923	20.6998	0	8768	26.2163	0	5168	15.4523	0	3386	10.1241	0	3510	10.4949	0	7345	21.9615	0	6952	20.7865	0	16485	49.2902	0	36337	108.648	0	1084	3.2412	5.687e-16	26043	77.8686	0	3813	11.4009	0	42446	126.913	0	22288	66.6411
1989	5.9471	0	10879	32.5282	0	9587	28.6651	0	7024	21.0018	0	9060	27.0894	0	5171	15.4613	0	3395	10.151	0	3522	10.5308	0	7418	22.1798	0	6963	20.8194	0	17550	52.4745	0	36579	109.371	0	1085	3.2441	0	26045	77.8745	0	3831	11.4547	0	42452	126.931	1.755e-15	22292	66.6531
2026	6.0577	0	10973	32.8093	0	9619	28.7608	0	7047	21.0705	0	9416	28.1538	0	5233	15.6467	0	3436	10.2736	0	3550	10.6145	0	7425	22.2007	0	7037	21.0406	0	17602	52.63	0	36648	109.578	0	1091	3.2621	0	26113	78.0779	0	3887	11.6221	0	42459	126.952	7.793e-16	22310	66.7069
2040	6.0996	0	11000	32.89	0	9641	28.8266	0	7214	21.5699	0	9521	28.4678	0	5264	15.7394	0	3464	10.3574	0	3585	10.7192	1.3e-15	7536	22.5326	0	7168	21.4323	0	18021	53.8828	0	37054	110.791	0	1128	3.3727	8.294e-16	26180	78.2782	0	3889	11.6281	0	42471	126.988	0	22313	66.7159
2060	6.1594	0	11090	33.1591	0	9654	28.8655	0	7236	21.6356	4.664e-15	9678	28.9372	0	5319	15.9038	0	3543	10.5936	0	3587	10.7251	0	7565	22.6194	1.191e-15	7195	21.513	4.866e-16	18118	54.1728	0	37088	110.893	0	1129	3.3757	0	26221	78.4008	8.207e-16	3903	11.67	0	42537	127.186	0	22320	66.7368
2074	6.2013	0	11207	33.5089	0	9713	29.0419	0	7256	21.6954	0	9988	29.8641	0	5321	15.9098	0	3550	10.6145	0	3632	10.8597	0	7681	22.9662	4.39e-16	7210	21.5579	0	18369	54.9233	0	37367	111.727	0	1134	3.3907	4.211e-16	26284	78.5892	0	3922	11.7268	0	42581	127.317	0	22326	66.7547
2179	6.5152	0	11319	33.8438	0	9777	29.2332	0	7431	22.2187	0	9999	29.897	0	5400	16.146	0	3629	10.8507	0	3727	11.1437	0	7919	23.6778	0	7220	21.5878	0	18524	55.3868	0	37443	111.955	0	1136	3.3966	0	26381	78.8792	0	3929	11.7477	0	42603	127.383	0	22348	66.8205
2233	6.6767	0	11335	33.8916	0	9915	29.6458	0	7452	22.2815	0	10048	30.0435	0	5401	16.149	0	3647	10.9045	0	3750	11.2125	1.003e-15	7929	23.7077	7.905e-16	7317	21.8778	0	18572	55.5303	0	38177	114.149	0	1143	3.4176	0	26389	78.9031	0	3959	11.8374	5.9e-16	42741	127.796	0	22350	66.8265
2257	6.7484	0	11384	34.0382	0	10035	30.0047	0	7499	22.422	0	10063	30.0884	0	5466	16.3433	0	3651	10.9165	0	3781	11.3052	0	7965	23.8153	0	7323	21.8958	0	18610	55.6439	4.698e-16	38401	114.819	0	1144	3.4206	0	26438	79.0496	0	3992	11.9361	0	42746	127.811	0	22367	66.8773
2260	6.7574	0	11422	34.1518	0	10408	31.1199	0	7543	22.5536	0	10259	30.6744	0	5529	16.5317	0	3666	10.9613	5.468e-15	3798	11.356	0	8084	24.1712	0	7387	22.0871	8.391e-16	18803	56.221	0	38978	116.544	0	1147	3.4295	5.448e-16	26576	79.4622	0	4012	11.9959	0	42747	127.814	0	22371	66.8893
2264	6.7694	0	11483	34.3342	0	10430	31.1857	0	7560	22.6044	0	10338	30.9106	0	5531	16.5377	0	3812	11.3979	0	3806	11.3799	0	8097	24.21	0	7419	22.1828	5.563e-16	18900	56.511	0	39442	117.932	0	1153	3.4475	0	26638	79.6476	0	4019	12.0168	0	43256	129.335	0	22374	66.8983
2331	6.9697	0	11496	34.373	0	10725	32.0678	0	7594	22.7061	0	10420	31.1558	0	5665	16.9383	0	3834	11.4637	5.507e-16	3821	11.4248	0	8132	24.3147	0	7473	22.3443	0	18941	56.6336	0	39616	118.452	0	1155	3.4535	0	26697	79.824	4.844e-16	4072	12.1753	0	43668	130.567	0	22382	66.9222
2354	7.0385	0	11565	34.5793	0	10773	32.2113	0	7617	22.7748	0	10439	31.2126	3.27e-15	5693	17.0221	0	3850	11.5115	0	3852	11.5175	4.214e-16	8184	24.4702	0	7494	22.4071	0	19307	57.7279	0	39803	119.011	0	1158	3.4624	4.735e-16	26745	79.9676	0	4157	12.4294	0	43878	131.195	0	22409	67.0029
2364	7.0684	0	11573	34.6033	0	10899	32.588	0	7771	23.2353	0	10927	32.6717	0	5716	17.0908	0	3873	11.5803	4.586e-16	3888	11.6251	0	8202	24.524	0	7516	22.4728	0	19477	58.2362	0	39838	119.116	0	1160	3.4684	0	26748	79.9765	0	4160	12.4384	0	44864	134.143	1.1e-15	22434	67.0777
2373	7.0953	0	11759	35.1594	0	11017	32.9408	0	7791	23.2951	0	11053	33.0485	0	5734	17.1447	0	3877	11.5922	0	3901	11.664	0	8210	24.5479	0	7536	22.5326	0	19643	58.7326	0	40204	120.21	0	1166	3.4863	5.495e-16	27036	80.8376	0	4186	12.5161	0	45092	134.825	0	22444	67.1076
2400	7.176	0	11854	35.4435	0	11111	33.2219	0	7875	23.5463	0	11125	33.2638	0	5777	17.2732	0	3969	11.8673	0	3919	11.7178	0	8283	24.7662	0	7538	22.5386	0	19752	59.0585	0	40524	121.167	0	1171	3.5013	0	27045	80.8645	0	4201	12.561	0	45718	136.697	0	22451	67.1285
2423	7.2448	0	11886	35.5391	0	11116	33.2368	0	7920	23.6808	0	11172	33.4043	0	5783	17.2912	0	3992	11.9361	0	3924	11.7328	0	8291	24.7901	0	7552	22.5805	0	19866	59.3993	7.372e-16	40572	121.31	0	1192	3.5641	8.102e-16	27083	80.9782	0	4235	12.6626	0	46086	137.797	0	22461	67.1584
2436	7.2836	0	12125	36.2538	0	11438	34.1996	0	7969	23.8273	0	11342	33.9126	0	5828	17.4257	0	4000	11.96	0	3956	11.8284	7.137e-16	8345	24.9516	0	7618	22.7778	0	19926	59.5787	0	40729	121.78	0	1225	3.6627	3.871e-16	27140	81.1486	0	4392	13.1321	0	46189	138.105	0	22463	67.1644
2438	7.2896	0	12163	36.3674	0	11460	34.2654	0	7994	23.9021	0	11389	34.0531	0	5868	17.5453	0	4026	12.0377	0	4087	12.2201	0	8398	25.11	0	7626	22.8017	0	20060	59.9794	0	40731	121.786	0	1268	3.7913	1.162e-14	27195	81.3131	0	4415	13.2009	0	46373	138.655	1.001e-15	22466	67.1733
2526	7.5527	0	12197	36.469	0	11521	34.4478	0	8188	24.4821	0	11440	34.2056	1.069e-15	5902	17.647	0	4039	12.0766	0	4102	12.265	0	8530	25.5047	7.328e-16	7661	22.9064	0	20257	60.5684	0	40789	121.959	0	1272	3.8033	6.012e-15	27217	81.3788	0	4431	13.2487	1.522e-15	46380	138.676	2.005e-15	22481	67.2182
2534	7.5767	0	12319	36.8338	0	11523	34.4538	0	8263	24.7064	0	11519	34.4418	0	5916	17.6888	0	4093	12.2381	0	4192	12.5341	2.836e-15	8596	25.702	0	7665	22.9184	0	20597	61.585	0	40940	122.411	0	1292	3.8631	4.567e-16	27255	81.4925	0	4458	13.3294	0	47390	141.696	6.437e-16	22482	67.2212
2543	7.6036	0	12392	37.0521	0	11576	34.6122	0	8307	24.8379	0	11573	34.6033	0	5918	17.6948	0	4107	12.2799	0	4204	12.57	0	8824	26.3838	0	7670	22.9333	0	20705	61.9079	0	41063	122.778	0	1295	3.8721	0	27268	81.5313	0	4462	13.3414	0	47986	143.478	3.655e-15	22489	67.2421
2566	7.6723	0	12403	37.085	0	11595	34.669	0	8370	25.0263	0	11706	35.0009	0	5931	17.7337	0	4136	12.3666	0	4218	12.6118	0	8850	26.4615	5.461e-16	7671	22.9363	3.582e-15	21199	63.385	0	41162	123.074	0	1298	3.881	0	27314	81.6689	0	4492	13.4311	0	47987	143.481	0	22494	67.2571
2597	7.765	0	12434	37.1777	0	11671	34.8963	0	8377	25.0472	0	11756	35.1504	0	5945	17.7755	0	4151	12.4115	0	4279	12.7942	0	8860	26.4914	0	7687	22.9841	0	21374	63.9083	0	41829	125.069	0	1302	3.893	2.148e-15	27319	81.6838	0	4593	13.7331	4.121e-16	48688	145.577	0	22503	67.284
2673	7.9923	0	12544	37.5066	0	11679	34.9202	0	8418	25.1698	0	11806	35.2999	1.164e-14	5946	17.7785	0	4152	12.4145	0	4320	12.9168	1.483e-15	8880	26.5512	0	7689	22.9901	0	21448	64.1295	0	41879	125.218	0	1322	3.9528	0	27468	82.1293	0	4606	13.7719	3.378e-15	49394	147.688	0	22529	67.3617
2678	8.0072	0	12558	37.5484	0	11707	35.0039	0	8508	25.4389	0	11827	35.3627	0	5955	17.8055	0	4173	12.4773	0	4328	12.9407	0	8965	26.8054	0	7730	23.1127	0	21757	65.0534	0	42355	126.641	0	1331	3.9797	0	27495	82.21	0	4695	14.0381	0	49487	147.966	0	22535	67.3796
2693	8.0521	0	12591	37.6471	0	11770	35.1923	0	8698	26.007	0	11888	35.5451	0	6023	18.0088	0	4338	12.9706	0	4334	12.9587	0	8974	26.8323	0	7763	23.2114	0	22303	66.686	0	42791	127.945	0	1341	4.0096	6.037e-15	27535	82.3297	0	4697	14.044	0	49527	148.086	1.811e-15	22544	67.4066
2745	8.2075	0	12600	37.674	0	11861	35.4644	0	8875	26.5362	0	11962	35.7664	0	6031	18.0327	0	4536	13.5626	0	4438	13.2696	4.512e-16	8989	26.8771	0	7767	23.2233	0	22581	67.5172	8.984e-16	43172	129.084	0	1345	4.0216	0	27547	82.3655	1.135e-15	4709	14.0799	0	49549	148.151	0	22550	67.4245
2761	8.2554	0	12606	37.6919	0	11925	35.6557	0	8919	26.6678	0	11968	35.7843	0	6042	18.0656	0	4542	13.5806	0	4548	13.5985	0	9002	26.916	0	7828	23.4057	3.901e-16	22824	68.2438	0	43526	130.143	0	1348	4.0305	0	27640	82.6436	0	4820	14.4118	0	49585	148.259	0	22554	67.4365
2888	8.6351	0	12644	37.8056	0	11943	35.7096	0	8940	26.7306	0	11996	35.868	0	6062	18.1254	0	4582	13.7002	0	4568	13.6583	0	9039	27.0266	0	7861	23.5044	0	22925	68.5457	0	44408	132.78	0	1352	4.0425	0	27729	82.9097	0	4837	14.4626	0	49603	148.313	0	22570	67.4843
2930	8.7607	0	12660	37.8534	0	11996	35.868	0	8961	26.7934	0	12054	36.0415	8.58e-16	6074	18.1613	0	4617	13.8048	0	4580	13.6942	0	9266	27.7053	9.978e-16	7928	23.7047	0	23071	68.9823	0	45262	135.333	0	1354	4.0485	0	27748	82.9665	0	4872	14.5673	0	49921	149.264	8.248e-16	22572	67.4903
2943	8.7996	0	12674	37.8953	0	12048	36.0235	0	8999	26.907	0	12097	36.17	0	6122	18.3048	0	4630	13.8437	0	4595	13.7391	0	9384	28.0582	0	8011	23.9529	0	23143	69.1976	0	45531	136.138	0	1357	4.0574	0	27778	83.0562	0	4932	14.7467	0	49982	149.446	0	22574	67.4963
2944	8.8026	0	12698	37.967	0	12082	36.1252	0	9001	26.913	0	12158	36.3524	0	6132	18.3347	0	4638	13.8676	0	4609	13.7809	0	9512	28.4409	0	8013	23.9589	0	23449	70.1125	0	45654	136.506	0	1370	4.0963	2.229e-15	27797	83.113	0	4971	14.8633	0	50166	149.996	8.356e-16	22578	67.5082
3033	9.0687	0	12732	38.0687	0	12086	36.1371	0	9026	26.9877	0	12161	36.3614	0	6166	18.4363	0	4752	14.2085	0	4682	13.9992	0	9524	28.4768	0	8027	24.0007	0	23663	70.7524	1.07e-15	46323	138.506	0	1382	4.1322	4.208e-15	27811	83.1549	0	5004	14.962	0	52719	157.63	0	22581	67.5172
3058	9.1434	0	12896	38.559	0	12117	36.2298	0	9070	27.1193	0	12177	36.4092	0	6227	18.6187	0	4866	14.5493	0	4721	14.1158	0	9544	28.5366	0	8061	24.1024	0	23930	71.5507	0	46442	138.862	0	1390	4.1561	5.714e-16	27818	83.1758	0	5025	15.0248	0	53209	159.095	0	22585	67.5292
3108	9.2929	0	12981	38.8132	0	12149	36.3255	0	9091	27.1821	0	12182	36.4242	0	6228	18.6217	0	4871	14.5643	0	4749	14.1995	1.608e-15	9620	28.7638	1.407e-15	8099	24.216	3.031e-15	24038	71.8736	0	46559	139.211	4.742e-16	1416	4.2338	1.249e-15	27831	83.2147	0	5044	15.0816	0	53330	159.457	0	22590	67.5441
3114	9.3109	0	13045	39.0046	0	12153	36.3375	0	9207	27.5289	0	12199	36.475	0	6409	19.1629	0	4915	14.6959	0	4808	14.3759	3.634e-16	9657	28.8744	8.004e-16	8144	24.3506	0	24086	72.0171	1.319e-15	46634	139.436	0	1419	4.2428	0	27848	83.2655	0	5133	15.3477	7.915e-16	53410	159.696	5.805e-15	22594	67.5561
3128	9.3527	0	13093	39.1481	0	12166	36.3763	0	9253	27.6665	0	12245	36.6125	0	6422	19.2018	0	4957	14.8214	0	4810	14.3819	0	9674	28.9253	0	8196	24.506	0	24369	72.8633	0	46685	139.588	0	1431	4.2787	6.531e-16	27879	83.3582	0	5137	15.3596	0	53876	161.089	6.988e-15	22596	67.562
3162	9.4544	0	13100	39.169	0	12181	36.4212	0	9263	27.6964	0	12255	36.6425	0	6433	19.2347	0	4961	14.8334	0	4899	14.648	0	9727	29.0837	0	8314	24.8589	0	24457	73.1264	8.713e-15	46919	140.288	0	1443	4.3146	1.226e-15	27885	83.3761	0	5144	15.3806	0	54320	162.417	2.15e-15	22598	67.568
3177	9.4992	0	13425	40.1407	0	12218	36.5318	0	9467	28.3063	0	12266	36.6753	0	6455	19.3005	0	4972	14.8663	0	4916	14.6988	4.515e-16	9744	29.1346	0	8330	24.9067	0	24607	73.5749	0	47169	141.035	0	1455	4.3505	0	27888	83.3851	0	5172	15.4643	0	54509	162.982	1.12e-15	22619	67.6308
3191	9.5411	0	13674	40.8853	0	12230	36.5677	0	9576	28.6322	0	12287	36.7381	0	6492	19.4111	0	4977	14.8812	0	4932	14.7467	3.668e-15	9957	29.7714	8.34e-16	8520	25.4748	0	24614	73.5959	0	47219	141.185	0	1480	4.4252	7.624e-16	27905	83.436	0	5287	15.8081	0	54854	164.013	0	22621	67.6368
3200	9.568	0	13825	41.3368	0	12343	36.9056	0	9589	28.6711	0	12325	36.8518	0	6506	19.4529	0	5000	14.95	0	4966	14.8483	0	10029	29.9867	0	8535	25.5196	0	24699	73.85	0	47277	141.358	0	1486	4.4431	0	27923	83.4898	0	5321	15.9098	0	56464	168.827	0	22623	67.6428
3204	9.58	0	13953	41.7195	0	12359	36.9534	0	9712	29.0389	0	12443	37.2046	0	6511	19.4679	0	5095	15.234	0	5033	15.0487	3.987e-16	10034	30.0017	0	8548	25.5585	2.075e-15	24814	74.1939	0	48417	144.767	0	1489	4.4521	0	27930	83.5107	0	5323	15.9158	0	56891	170.104	0	22626	67.6517
3257	9.7384	0	14104	42.171	0	12382	37.0222	0	10123	30.2678	0	12452	37.2315	0	6584	19.6862	0	5136	15.3566	0	5102	15.255	0	10046	30.0375	2.066e-15	8589	25.6811	1.023e-15	24819	74.2088	0	48471	144.928	0	1499	4.482	0	27934	83.5227	0	5351	15.9995	0	56915	170.176	0	22631	67.6667
3269	9.7743	0	14227	42.5387	0	12385	37.0312	0	10368	31.0003	0	12462	37.2614	0	6601	19.737	0	5191	15.5211	0	5142	15.3746	0	10139	30.3156	0	8597	25.705	0	24896	74.439	0	48849	146.059	0	1500	4.485	5.28e-16	27982	83.6662	0	5372	16.0623	0	57692	172.499	1.03e-15	22637	67.6846
3300	9.867	0	14260	42.6374	0	12395	37.0611	0	10413	31.1349	0	12483	37.3242	0	6642	19.8596	0	5194	15.5301	0	5278	15.7812	0	10148	30.3425	0	8602	25.72	0	25249	75.4945	6.652e-16	49011	146.543	0	1502	4.491	0	28031	83.8127	0	5386	16.1041	0	57784	172.774	0	22640	67.6936
3303	9.876	0	14578	43.5882	0	12425	37.1508	0	10426	31.1737	0	12508	37.3989	0	6673	19.9523	0	5274	15.7693	8.674e-16	5325	15.9217	3.708e-16	10256	30.6654	8.375e-16	8608	25.7379	0	25268	75.5513	0	49139	146.926	0	1507	4.5059	0	28036	83.8276	0	5397	16.137	0	57974	173.342	0	22652	67.7295
3312	9.9029	0	14845	44.3865	0	12436	37.1836	0	10446	31.2335	0	12661	37.8564	0	6704	20.045	0	5276	15.7752	0	5388	16.1101	0	10497	31.386	0	8642	25.8396	0	25378	75.8802	0	49200	147.108	0	1516	4.5328	1.243e-14	28037	83.8306	0	5402	16.152	0	59020	176.47	0	22656	67.7414
3314	9.9089	0	15152	45.3045	0	12449	37.2225	0	10449	31.2425	0	12742	38.0986	6.516e-16	6871	20.5443	0	5345	15.9816	0	5402	16.152	0	10518	31.4488	0	8643	25.8426	0	25421	76.0088	0	49353	147.565	0	1520	4.5448	0	28041	83.8426	0	5421	16.2088	0	59144	176.841	0	22661	67.7564
3332	9.9627	0	15370	45.9563	0	12459	37.2524	0	10520	31.4548	0	12778	38.2062	0	6886	20.5891	0	5353	16.0055	0	5425	16.2207	0	10552	31.5505	7.653e-15	8647	25.8545	0	25569	76.4513	0	49363	147.595	0	1538	4.5986	0	28045	83.8546	0	5440	16.2656	0	59748	178.647	1.671e-15	22675	67.7982
3359	10.0434	0	15759	47.1194	0	12470	37.2853	0	10524	31.4668	0	12928	38.6547	0	6935	20.7356	0	5358	16.0204	0	5446	16.2835	0	10556	31.5624	0	8656	25.8814	0	26097	78.03	0	49692	148.579	0	1543	4.6136	0	28094	84.0011	0	5475	16.3702	0	60297	180.288	0	22677	67.8042
3370	10.0763	0	16466	49.2333	0	12477	37.3062	0	10607	31.7149	3.721e-15	12933	38.6697	4.544e-15	7016	20.9778	0	5362	16.0324	0	5458	16.3194	0	10600	31.694	9.297e-16	8698	26.007	0	26310	78.6669	0	49849	149.048	0	1552	4.6405	1.335e-15	28101	84.022	0	5501	16.448	0	60362	180.482	0	22680	67.8132
3405	10.1809	0	16692	49.9091	0	12515	37.4199	0	10659	31.8704	0	13110	39.1989	0	7099	21.226	0	5377	16.0772	0	5488	16.4091	0	10625	31.7688	0	8775	26.2372	0	26510	79.2649	0	51189	153.055	0	1554	4.6465	0	28109	84.0459	0	5506	16.4629	0				22685	67.8281
3408	10.1899	0	16768	50.1363	0	12611	37.7069	0	10765	32.1874	0	13181	39.4112	0	7104	21.241	0	5423	16.2148	0	5490	16.4151	8.78e-16	10626	31.7717	1.459e-15	8794	26.2941	1.125e-15	26713	79.8719	0	51221	153.151	0	1566	4.6823	9.192e-16	28120	84.0788	0	5663	16.9324	0				22686	67.8311
3434	10.2677	0	16799	50.229	0	12703	37.982	0	10780	32.2322	0	13225	39.5427	2.178e-15	7180	21.4682	0	5511	16.4779	0	5520	16.5048	6.012e-16	10631	31.7867	9.508e-16	8903	26.62	0	27124	81.1008	0	51344	153.519	6.037e-16	1568	4.6883	4.307e-15	28141	84.1416	0	5667	16.9443	0				22695	67.8581
3444	10.2976	0	16851	50.3845	0	12736	38.0806	0	10986	32.8481	0	13256	39.6354	0	7230	21.6177	0	5538	16.5586	0	5526	16.5227	6.308e-16	10636	31.8016	0	8910	26.6409	0	27174	81.2503	0	51420	153.746	1.179e-15	1570	4.6943	0	28150	84.1685	0	5693	17.0221	0				22699	67.87
3463	10.3544	0	16940	50.6506	0	12764	38.1644	0	10989	32.8571	0	13295	39.752	0	7267	21.7283	0	5558	16.6184	0	5535	16.5496	0	10670	31.9033	5.015e-16	8919	26.6678	2.091e-15	27250	81.4775	0	51430	153.776	0	1574	4.7063	1.071e-15	28184	84.2702	0	5708	17.0669	0				22700	67.873
3478	10.3992	0	16984	50.7822	0	12821	38.3348	0	11024	32.9618	0	13324	39.8388	0	7288	21.7911	0	5563	16.6334	0	5540	16.5646	0	10691	31.9661	4.625e-16	8943	26.7396	0	27496	82.213	0	52178	156.012	0	1576	4.7122	6.632e-16	28203	84.327	0	5722	17.1088	0				22704	67.885
3483	10.4142	0	17043	50.9586	0	12881	38.5142	0	11112	33.2249	0	13346	39.9045	0	7376	22.0542	0	5614	16.7859	0	5608	16.7679	0	10701	31.996	6.639e-16	8946	26.7485	0	27528	82.3087	0	52292	156.353	0	1579	4.7212	0	28206	84.3359	0	5738	17.1566	0				22720	67.9328
3499	10.462	0	17058	51.0034	0	13521	40.4278	0	11136	33.2966	0	13368	39.9703	3.569e-15	7438	22.2396	0	5663	16.9324	0	5621	16.8068	0	10741	32.1156	0	8971	26.8233	0	27572	82.4403	0	52399	156.673	0	1582	4.7302	0	28435	85.0207	0	5777	17.2732	0				22726	67.9507
3548	10.6085	0	17115	51.1739	0	14009	41.8869	0	11142	33.3146	0	13431	40.1587	0	7454	22.2875	0	5677	16.9742	0	5682	16.9892	0	10824	32.3638	0	9107	27.2299	4.512e-16	28509	85.2419	0	52599	157.271	0	1589	4.7511	0	28456	85.0834	0	5799	17.339	0				22743	68.0016
3563	10.6534	0	17210	51.4579	0	14125	42.2338	0	11160	33.3684	0	13479	40.3022	0	7471	22.3383	0	5692	17.0191	0	5716	17.0908	0	10902	32.597	1.674e-14	9158	27.3824	0	28584	85.4662	0	52628	157.358	0	1597	4.775	7.786e-16	28838	86.2256	0	5888	17.6051	0				22750	68.0225
3606	10.7819	0	17215	51.4729	0	14191	42.4311	0	11211	33.5209	0	13514	40.4069	0	7490	22.3951	0	5728	17.1267	0	5718	17.0968	0	10926	32.6687	0	9221	27.5708	0	28751	85.9655	1.76e-15	52788	157.836	0	1626	4.8617	0	28903	86.42	0	5919	17.6978	0				22824	68.2438
3638	10.8776	0	17294	51.7091	0	14257	42.6284	0	11227	33.5687	0	13571	40.5773	0	7523	22.4938	0	5806	17.3599	1.361e-15	5789	17.3091	4.737e-16	10945	32.7255	9.579e-16	9273	27.7263	7.535e-16	29209	87.3349	0	53505	159.98	0	1633	4.8827	0	29283	87.5562	0	5927	17.7217	0				22838	68.2856
3676	10.9912	0	17313	51.7659	7.178e-15	14407	43.0769	0	11261	33.6704	0	13652	40.8195	0	7527	22.5057	0	5886	17.5991	0	5856	17.5094	0	11104	33.201	0	9285	27.7622	0	29230	87.3977	0	53921	161.224	0	1654	4.9455	3.99e-15	29289	87.5741	0	5952	17.7965	0				22841	68.2946
3692	11.0391	0	17319	51.7838	0	14532	43.4507	0	11321	33.8498	0	13742	41.0886	0	7555	22.5894	0	5951	17.7935	0	5868	17.5453	6.567e-16	11122	33.2548	0	9426	28.1837	4.922e-16	29547	88.3455	0	54281	162.3	0	1670	4.9933	0	29352	87.7625	0	5979	17.8772	0				22842	68.2976
3724	11.1348	0	17327	51.8077	0	14588	43.6181	0	11423	34.1548	0	13948	41.7045	0	7564	22.6164	0	5973	17.8593	0	5950	17.7905	4.02e-16	11155	33.3535	0	9449	28.2525	0	29624	88.5758	0	54306	162.375	0	1677	5.0142	0	29444	88.0376	0	5999	17.937	0				22865	68.3663
3785	11.3171	0	17351	51.8795	0	14655	43.8184	0	11431	34.1787	0	14194	42.4401	0	7686	22.9811	0	5980	17.8802	0	5951	17.7935	0	11161	33.3714	0	9535	28.5097	0	29635	88.6086	0	54524	163.027	0	1682	5.0292	0	29658	88.6774	0	6000	17.94	0				22891	68.4441
3794	11.3441	0	17495	52.3101	0	14779	44.1892	0	11486	34.3431	0	14233	42.5567	0	7825	23.3968	0	6003	17.949	0	5959	17.8174	0	11356	33.9544	0	9558	28.5784	0	29915	89.4459	0	54545	163.09	0	1684	5.0352	2.164e-15	29841	89.2246	4.741e-16	6011	17.9729	0				22893	68.4501
3805	11.377	0	17532	52.4207	0	14879	44.4882	0	11501	34.388	0	14257	42.6284	0	7884	23.5732	0	6009	17.9669	0	5963	17.8294	0	11433	34.1847	0	9578	28.6382	0	29982	89.6462	0	54730	163.643	0	1698	5.077	0	29864	89.2934	0	6120	18.2988	0				22913	68.5099
3816	11.4098	0	17568	52.5283	0	15137	45.2596	0	11631	34.7767	0	14339	42.8736	0	7914	23.6629	0	6106	18.2569	0	5973	17.8593	1.557e-15	11459	34.2624	0	9579	28.6412	0	30009	89.7269	0	54791	163.825	0	1705	5.0979	9.42e-16	30259	90.4744	0	6134	18.3407	0				22922	68.5368
3818	11.4158	0	17870	53.4313	0	15144	45.2806	0	11735	35.0877	0	14447	43.1965	0	8051	24.0725	0	6247	18.6785	0	6026	18.0177	4.395e-16	11522	34.4508	0	9615	28.7489	0	30065	89.8944	0	55083	164.698	0	1716	5.1308	0	30269	90.5043	0	6149	18.3855	0				22944	68.6026
3835	11.4666	0	17877	53.4522	0	15243	45.5766	0	11817	35.3328	0	14483	43.3042	1.115e-15	8070	24.1293	0	6319	18.8938	0	6027	18.0207	0	11537	34.4956	0	9639	28.8206	1.967e-15	30099	89.996	0	55712	166.579	0	1723	5.1518	0	30381	90.8392	0	6189	18.5051	0				22949	68.6175
3863	11.5504	0	17948	53.6645	0	15303	45.756	0	11830	35.3717	0	14512	43.3909	0	8107	24.2399	0	6341	18.9596	0	6048	18.0835	0	11543	34.5136	0	9691	28.9761	0	30240	90.4176	0	55933	167.24	0	1746	5.2205	4.157e-16	30382	90.8422	0	6236	18.6456	0				22982	68.7162
3885	11.6161	0	17989	53.7871	0	15434	46.1477	0	12063	36.0684	0	14535	43.4597	0	8198	24.512	0	6400	19.136	0	6060	18.1194	5.683e-16	11590	34.6541	0	9702	29.009	0	30332	90.6927	0	56431	168.729	0	1768	5.2863	6.932e-16	30472	91.1113	0	6258	18.7114	0				23002	68.776
3903	11.67	0	18052	53.9755	0	15465	46.2403	0	12289	36.7441	0	14571	43.5673	0	8201	24.521	0	6453	19.2945	0	6078	18.1732	0	11602	34.69	0	9784	29.2542	0	30536	91.3026	0	56467	168.836	0	1779	5.3192	0	30512	91.2309	0	6355	19.0015	0				23006	68.7879
3965	11.8553	0	18127	54.1997	0	15711	46.9759	0	12368	36.9803	0	14597	43.645	0	8206	24.5359	0	6556	19.6024	0	6089	18.2061	0	11635	34.7886	0	9795	29.2871	0	31119	93.0458	0	56698	169.527	0	1780	5.3222	0	30630	91.5837	0	6426	19.2137	0				23010	68.7999
3972	11.8763	0	18171	54.3313	0	15760	47.1224	0	12380	37.0162	0	14654	43.8155	0	8210	24.5479	0	6613	19.7729	0	6103	18.248	0	11690	34.9531	0	9960	29.7804	0	31252	93.4435	0	57116	170.777	0	1790	5.3521	0	30861	92.2744	1.989e-15	6468	19.3393	0				23018	68.8238
3990	11.9301	0	18303	54.726	0	15794	47.2241	0	12418	37.1298	0	14685	43.9081	0	8261	24.7004	0	6624	19.8058	0	6180	18.4782	0	11693	34.9621	0	9992	29.8761	0	31270	93.4973	4.69e-16	57284	171.279	0	1804	5.394	7.315e-16	30942	92.5166	7.289e-16	6619	19.7908	0				23027	68.8507
4052	12.1155	0	18310	54.7469	0	16070	48.0493	0	12589	37.6411	0	14727	44.0337	0	8409	25.1429	0	6723	20.1018	0	6245	18.6726	0	11722	35.0488	6.569e-16	10065	30.0943	2.048e-15	31541	94.3076	0	57373	171.545	0	1815	5.4268	0	30978	92.6242	0	6656	19.9014	0				23040	68.8896
4060	12.1394	0	18404	55.028	0	16183	48.3872	0	12617	37.7248	0	14794	44.2341	0	8454	25.2775	0	6764	20.2244	0	6248	18.6815	0	11763	35.1714	0	10145	30.3335	0	31774	95.0043	0	57617	172.275	0	1820	5.4418	0	31084	92.9412	0	6685	19.9882	0				23054	68.9315
4080	12.1992	0	18606	55.6319	0	16194	48.4201	0	12676	37.9012	0	14804	44.264	0	8512	25.4509	0	6772	20.2483	0	6253	18.6965	0	11871	35.4943	0	10210	30.5279	1.324e-15	31853	95.2405	0	57912	173.157	0	1827	5.4627	1.668e-15	31401	93.889	3.947e-15	6717	20.0838	0				23062	68.9554
4096	12.247	0	18771	56.1253	0	16295	48.7221	0	12829	38.3587	0	14930	44.6407	1.168e-15	8521	25.4778	0	6797	20.323	0	6268	18.7413	1.005e-15	11904	35.593	0	10343	30.9256	0	32294	96.5591	0	58067	173.62	0	1832	5.4777	0	31546	94.3225	0	6759	20.2094	0				23072	68.9853
4113	12.2979	0	18978	56.7442	0	16309	48.7639	0	12917	38.6218	0	14932	44.6467	0	8528	25.4987	0	6804	20.344	0	6292	18.8131	0	11945	35.7156	0	10347	30.9375	0	32437	96.9866	0	58146	173.857	0	1834	5.4837	2.996e-15	31615	94.5289	1.573e-15	6782	20.2782	0				23074	68.9913
4122	12.3248	0	18990	56.7801	0	16332	48.8327	0	13061	39.0524	0	14949	44.6975	0	8548	25.5585	0	6834	20.4337	0	6342	18.9626	0	12053	36.0385	6.757e-16	10423	31.1648	0	32443	97.0046	0	58394	174.598	0	1836	5.4896	0	31711	94.8159	0	6794	20.3141	0				23080	69.0092
4149	12.4055	0	19142	57.2346	0	16446	49.1735	0	13335	39.8717	0	14953	44.7095	5.773e-15	8562	25.6004	0	6861	20.5144	0	6380	19.0762	0	12077	36.1102	0	10491	31.3681	0	32471	97.0883	3.021e-15	58445	174.751	0	1841	5.5046	3.014e-15	31715	94.8278	0	6798	20.326	0				23132	69.1647
4163	12.4474	0	19145	57.2435	0	16459	49.2124	0	13431	40.1587	0	14978	44.7842	2.309e-13	8597	25.705	0	6885	20.5861	0	6388	19.1001	7.678e-16	12174	36.4003	0	10522	31.4608	0	32584	97.4262	0	59458	177.779	0	1844	5.5136	2.881e-15	31723	94.8518	0	6830	20.4217	0				23147	69.2095
4166	12.4563	0	19276	57.6352	0	16825	50.3068	0	13520	40.4248	0	14979	44.7872	0	8660	25.8934	0	6921	20.6938	0	6486	19.3931	0	12180	36.4182	0	10554	31.5565	0	32691	97.7461	0	60059	179.576	0	1845	5.5166	0	31746	94.9205	0	6870	20.5413	0				23155	69.2335
4173	12.4773	0	19387	57.9671	0	16906	50.5489	0	13634	40.7657	0	15247	45.5885	3.767e-15	8685	25.9682	0	6933	20.7297	0	6520	19.4948	0	12348	36.9205	0	10575	31.6193	0	32848	98.2155	8.47e-16	60192	179.974	0	1846	5.5195	0	31862	95.2674	0	6968	20.8343	0				23175	69.2933
4184	12.5102	0	19406	58.0239	0	17118	51.1828	0	13660	40.8434	0	15279	45.6842	0	8906	26.6289	0	6962	20.8164	0	6529	19.5217	2.295e-15	12413	37.1149	0	10723	32.0618	0	32913	98.4099	0	60274	180.219	0	1850	5.5315	5.741e-16	31915	95.4258	2.903e-14	7003	20.939	0				23183	69.3172
4188	12.5221	0	19794	59.1841	0	17357	51.8974	0	13711	40.9959	0	15418	46.0998	0	8912	26.6469	0	6973	20.8493	0	6542	19.5606	0	12440	37.1956	0	10785	32.2471	0	33028	98.7537	0				1853	5.5405	5.307e-16	32074	95.9013	0	7013	20.9689	0				23221	69.4308
4246	12.6955	0	20666	61.7913	0	17494	52.3071	0	13732	41.0587	0	15444	46.1776	0	8959	26.7874	0	6987	20.8911	0	6611	19.7669	4.853e-16	12446	37.2135	5.765e-16	10831	32.3847	0	33102	98.975	0				1858	5.5554	0	32151	96.1315	7.435e-16	7053	21.0885	0				23241	69.4906
4275	12.7822	0	20683	61.8422	0	17551	52.4775	0	13752	41.1185	0	15511	46.3779	1.142e-15	8974	26.8323	0	7048	21.0735	0	6680	19.9732	0	12461	37.2584	0	10894	32.5731	0	33197	99.259	0				1863	5.5704	0	32343	96.7056	0	7064	21.1214	0				23251	69.5205
4334	12.9587	0	20685	61.8482	0	17664	52.8154	0	13758	41.1364	0	15785	47.1972	0	9003	26.919	0	7059	21.1064	0	6745	20.1675	0	12479	37.3122	0	10901	32.594	0	33251	99.4205	0				1864	5.5734	5.398e-16	32996	98.658	0	7086	21.1871	0				23262	69.5534
4368	13.0603	0	20709	61.9199	0	17738	53.0366	0	13801	41.265	0	15796	47.23	0	9033	27.0087	0	7128	21.3127	0	6765	20.2274	0	12526	37.4527	0	10964	32.7824	2.728e-15	33368	99.7703	0				1866	5.5793	0	33008	98.6939	0	7122	21.2948	0				23282	69.6132
4405	13.1709	0	20817	62.2428	0	17979	53.7572	0	13834	41.3637	0	15800	47.242	2.682e-15	9094	27.1911	0	7139	21.3456	0	6784	20.2842	0	12549	37.5215	0	10965	32.7854	0	33551	100.317	0				1876	5.6092	1.537e-15	33344	99.6986	0	7144	21.3606	0				23292	69.6431
4415	13.2009	0	20958	62.6644	0	18057	53.9904	0	13840	41.3816	0	15968	47.7443	1.176e-15	9126	27.2867	0	7157	21.3994	0	6814	20.3739	0	12622	37.7398	3.582e-16	10998	32.884	0	33573	100.383	0				1888	5.6451	5.156e-16	33600	100.464	0	7200	21.528	0				23295	69.6521
4439	13.2726	0	21038	62.9036	0	18218	54.4718	0	13906	41.5789	0	16304	48.749	0	9190	27.4781	0	7177	21.4592	0	6823	20.4008	3.817e-16	12644	37.8056	0	11007	32.9109	0	33578	100.398	0				1895	5.6661	0	33720	100.823	6.101e-15	7232	21.6237	0				23310	69.6969
4448	13.2995	0	21050	62.9395	0	18239	54.5346	0	13910	41.5909	0	16421	49.0988	0	9205	27.523	0	7222	21.5938	0	6842	20.4576	0	12717	38.0238	0	11017	32.9408	0	33980	101.6	0				1906	5.6989	0	33798	101.056	0	7249	21.6745	0				23315	69.7118
4485	13.4101	0	21085	63.0442	0	18242	54.5436	0	13963	41.7494	0	16486	49.2931	0	9377	28.0372	0	7398	22.12	0	6853	20.4905	0	12732	38.0687	6.454e-16	11123	33.2578	0	34047	101.8	6.611e-16				1930	5.7707	4.049e-16	33799	101.059	0	7260	21.7074	0				23320	69.7268
4492	13.4311	0	21301	63.69	0	18337	54.8276	0	13972	41.7763	0	16600	49.634	0	9446	28.2435	0	7422	22.1918	0	6857	20.5024	0	12825	38.3468	4.527e-16	11171	33.4013	0	34050	101.809	1.077e-15				1931	5.7737	0	33879	101.298	0	7266	21.7253	0				23322	69.7328
4499	13.452	0	21335	63.7917	0	18364	54.9084	0	13974	41.7823	0	16627	49.7147	0	9479	28.3422	0	7590	22.6941	0	6875	20.5562	0	12962	38.7564	0	11212	33.5239	0	34090	101.929	0				1935	5.7857	0	34188	102.222	1.289e-15	7272	21.7433	0				23329	69.7537
4505	13.47	0	21346	63.8245	0	18413	55.0549	0	13982	41.8062	0	16713	49.9719	7.647e-16	9485	28.3602	0	7601	22.727	0	6897	20.622	0	13001	38.873	0	11251	33.6405	0	34474	103.077	0				1955	5.8455	2.903e-15	34270	102.467	7.278e-16	7347	21.9675	0				23367	69.8673
4507	13.4759	0	21364	63.8784	0	18489	55.2821	0	14001	41.863	0	16812	50.2679	0	9492	28.3811	0	7642	22.8496	0	6929	20.7177	0	13322	39.8328	0	11313	33.8259	0	34603	103.463	0				1966	5.8783	0	34444	102.988	0	7367	22.0273	0				23386	69.9241
4521	13.5178	0	21371	63.8993	0	18704	55.925	0	14114	42.2009	0	16835	50.3366	0	9531	28.4977	0	7685	22.9781	0	6969	20.8373	0	13376	39.9942	0	11320	33.8468	0	34652	103.609	0				1968	5.8843	4.155e-15	34950	104.501	0	7374	22.0483	0				23392	69.9421
4533	13.5537	0	21441	64.1086	0	18752	56.0685	0	14125	42.2338	0	16884	50.4832	0	9630	28.7937	0	7757	23.1934	0	7036	21.0376	0	13392	40.0421	5.052e-16	11364	33.9784	6.534e-16	34702	103.759	0				1970	5.8903	2.581e-15	35763	106.931	0	7471	22.3383	0				23395	69.951
4557	13.6254	0	21519	64.3418	0	18773	56.1313	0	14405	43.071	0	17303	51.736	0	9664	28.8954	0	7949	23.7675	0	7075	21.1543	0	13422	40.1318	0	11411	34.1189	0	34750	103.903	0				1987	5.9411	0	36145	108.073	0	7483	22.3742	0				23413	70.0049
4559	13.6314	0	21564	64.4764	0	18819	56.2688	0	14431	43.1487	0	17338	51.8406	0	9686	28.9611	0	7980	23.8602	0	7095	21.2141	0	13541	40.4876	0	11466	34.2833	0	34922	104.417	0				2000	5.98	0	37064	110.821	0	7486	22.3831	0				23426	70.0437
4570	13.6643	0	21581	64.5272	0	18849	56.3585	0	14759	44.1294	0	17454	52.1875	4.251e-15	9690	28.9731	0	7994	23.9021	0	7102	21.235	0	13638	40.7776	1.379e-15	11483	34.3342	0	35447	105.987	0				2004	5.992	5.281e-16	37299	111.524	0	7505	22.4399	0				23439	70.0826
4595	13.7391	0	21608	64.6079	0	18853	56.3705	0	14875	44.4763	0	17455	52.1904	0	9725	29.0778	0	8010	23.9499	0	7123	21.2978	5.441e-16	13676	40.8912	2.192e-15	11513	34.4239	0	35870	107.251	0				2007	6.0009	0	37381	111.769	0	7522	22.4908	0				23441	70.0886
4609	13.7809	0	21674	64.8053	0	18885	56.4661	0	14887	44.5121	0	17587	52.5851	1.017e-15	9774	29.2243	0	8064	24.1114	0	7139	21.3456	0	13677	40.8942	0	11521	34.4478	4.422e-16	35871	107.254	8.828e-16				2011	6.0129	1.038e-14	37937	113.432	5.56e-16	7556	22.5924	0				23443	70.0946
4610	13.7839	0	21694	64.8651	0	18927	56.5917	0	14981	44.7932	0	17758	53.0964	0	9809	29.3289	0	8174	24.4403	0	7178	21.4622	4.415e-16	13705	40.9779	0	11536	34.4926	0	35988	107.604	0				2012	6.0159	0	38017	113.671	0	7596	22.712	0				23464	70.1574
4620	13.8138	0	21755	65.0474	0	19026	56.8877	0	15027	44.9307	0	17787	53.1831	0	9817	29.3528	0	8215	24.5629	0	7195	21.513	0	13796	41.25	0	11582	34.6302	0	36031	107.733	0				2019	6.0368	2.047e-15	38112	113.955	0	7606	22.7419	0				23473	70.1843
4634	13.8557	0	21836	65.2896	0	19127	57.1897	0	15037	44.9606	0	18079	54.0562	0	9835	29.4066	0	8241	24.6406	0	7215	21.5728	0	13819	41.3188	0	11742	35.1086	0	36053	107.799	0				2033	6.0787	6.885e-16	38344	114.649	2.323e-15	7658	22.8974	0				23487	70.2261
4653	13.9125	0	21897	65.472	0	19134	57.2107	0	15067	45.0503	0	18121	54.1818	0	9847	29.4425	0	8274	24.7393	0	7220	21.5878	0	13853	41.4205	0	11845	35.4166	0	36057	107.81	0				2042	6.1056	0	38364	114.708	0	7695	23.0081	0				23515	70.3098
4658	13.9274	0	21935	65.5857	0	19145	57.2435	0	15154	45.3105	0	18738	56.0266	0	9881	29.5442	0	8340	24.9366	0	7270	21.7373	0	13881	41.5042	4.305e-16	11975	35.8053	0	36234	108.34	0				2051	6.1325	0	38569	115.321	0	7707	23.0439	0				23532	70.3607
4665	13.9483	0	22140	66.1986	0	19236	57.5156	0	15176	45.3762	0	18907	56.5319	1.403e-15	9890	29.5711	0	8348	24.9605	0	7363	22.0154	0	13945	41.6955	7.017e-15	12052	36.0355	0	36277	108.468	0				2069	6.1863	7.729e-16	39027	116.691	0	7753	23.1815	0				23542	70.3906
4682	13.9992	0	22187	66.3391	0	19258	57.5814	0	15183	45.3972	0	18997	56.801	0	9909	29.6279	0	8390	25.0861	0	7373	22.0453	6.824e-16	14085	42.1142	0	12087	36.1401	0	36331	108.63	0				2081	6.2222	2.272e-15	39196	117.196	0	7764	23.2144	0				23576	70.4922
4690	14.0231	0	22490	67.2451	0	19287	57.6681	0	15229	45.5347	0	19030	56.8997	0	9944	29.7326	0	8404	25.128	0	7399	22.123	0	14090	42.1291	0	12097	36.17	0	36455	109.001	0				2082	6.2252	0	40084	119.851	0	7773	23.2413	0				23581	70.5072
4691	14.0261	0	22632	67.6697	0	19380	57.9462	0	15261	45.6304	0	19041	56.9326	2.154e-15	10005	29.915	0	8428	25.1997	0	7405	22.141	0	14127	42.2397	0	12221	36.5408	0	36486	109.093	1.061e-15				2089	6.2461	0	40237	120.309	0	7778	23.2562	0				23594	70.5461
4700	14.053	0	22641	67.6966	0	19417	58.0568	0	15274	45.6693	0	19079	57.0462	6.623e-16	10017	29.9508	0	8443	25.2446	0	7461	22.3084	0	14240	42.5776	0	12293	36.7561	0	36502	109.141	0				2110	6.3089	0	40641	121.517	0	7780	23.2622	0				23622	70.6298
4718	14.1068	0	22648	67.7175	0	19493	58.2841	0	15276	45.6752	0	19088	57.0731	0	10018	29.9538	0	8450	25.2655	0	7472	22.3413	0	14490	43.3251	0	12298	36.771	0	36517	109.186	0				2112	6.3149	0	40664	121.585	0	7785	23.2771	0				23631	70.6567
4726	14.1307	0	22720	67.9328	0	19673	58.8223	0	15371	45.9593	0	19092	57.0851	0	10021	29.9628	0	8455	25.2805	0	7484	22.3772	0	14528	43.4387	8.682e-16	12362	36.9624	0	36525	109.21	0				2115	6.3239	1.047e-15	40665	121.588	0	7790	23.2921	0				23657	70.7344
4729	14.1397	0	22781	68.1152	0	19914	59.5429	0	15421	46.1088	0	19149	57.2555	0	10026	29.9777	0	8456	25.2834	0	7527	22.5057	0	14537	43.4656	0	12448	37.2195	0	36552	109.29	0				2125	6.3537	0	40764	121.884	1.153e-15	7832	23.4177	0				23664	70.7554
4743	14.1816	0	22830	68.2617	0	19927	59.5817	0	15426	46.1237	0	19226	57.4857	0	10032	29.9957	0	8513	25.4539	0	7692	22.9991	0	14573	43.5733	0	12705	37.9879	0	36562	109.32	0				2128	6.3627	4.84e-16	41191	123.161	0	7868	23.5253	0				23668	70.7673
4747	14.1935	0	22838	68.2856	0	19970	59.7103	0	15431	46.1387	0	19308	57.7309	0	10101	30.202	0	8526	25.4927	0	7783	23.2712	0	14582	43.6002	7.37e-16	12708	37.9969	0	36576	109.362	0				2135	6.3837	0	41672	124.599	0	7924	23.6928	0				23710	70.8929
4750	14.2025	0	22861	68.3544	0	20007	59.8209	0	15485	46.3002	0	19396	57.994	0	10155	30.3635	0	8529	25.5017	0	7792	23.2981	0	14588	43.6181	6.892e-16	12720	38.0328	0	36624	109.506	0				2166	6.4763	6.465e-16	41748	124.826	0	7971	23.8333	0				23716	70.9108
4769	14.2593	0	22894	68.4531	0	20027	59.8807	0	15488	46.3091	0	19478	58.2392	0	10261	30.6804	0	8545	25.5495	0	7826	23.3997	0	14703	43.962	0	12738	38.0866	0	36664	109.625	4.377e-16				2179	6.5152	3.027e-15	42614	127.416	4.619e-16	7979	23.8572	0				23746	71.0005
4787	14.3131	0	22970	68.6803	0	20053	59.9585	0	15542	46.4706	0	19498	58.299	0	10288	30.7611	0	8556	25.5824	0	7877	23.5522	8.771e-16	14794	44.2341	0	12746	38.1105	0	36910	110.361	0				2194	6.5601	0	43283	129.416	0	8009	23.9469	0				23767	71.0633
4793	14.3311	0	23019	68.8268	0	20087	60.0601	0	15605	46.6589	0	19537	58.4156	0	10296	30.785	0	8564	25.6064	9.184e-16	7905	23.636	0	14800	44.252	0	12870	38.4813	0	36920	110.391	0				2199	6.575	0	43405	129.781	0	8039	24.0366	0				23865	71.3564
4803	14.361	0	23030	68.8597	0	20110	60.1289	0	15658	46.8174	0	19572	58.5203	0	10301	30.8	0	8583	25.6632	0	7917	23.6718	0	14954	44.7125	0	12882	38.5172	0	36981	110.573	0				2200	6.578	0	43939	131.378	0	8061	24.1024	0				23877	71.3922
4812	14.3879	0	23207	69.3889	0	20148	60.2425	0	15694	46.9251	0	19606	58.6219	0	10346	30.9345	0	8603	25.723	0	7931	23.7137	0	15127	45.2297	5.396e-16	13005	38.885	0	37017	110.681	0				2201	6.581	7.144e-16	44449	132.903	0	8101	24.222	4.277e-16				23898	71.455
4824	14.4238	0	23550	70.4145	0	20165	60.2934	0	15703	46.952	0	19618	58.6578	0	10389	31.0631	0	8645	25.8485	0	8057	24.0904	0	15159	45.3254	2.184e-15	13011	38.9029	0	37071	110.842	0				2202	6.584	0	44696	133.641	0	8128	24.3027	0				23899	71.458
4832	14.4477	0	23583	70.5132	0	20529	61.3817	0	15705	46.958	0	19622	58.6698	0	10392	31.0721	0	8720	26.0728	0	8094	24.2011	0	15255	45.6125	0	13078	39.1032	0	37105	110.944	0				2205	6.593	6.176e-16	44735	133.758	0	8169	24.4253	0				23902	71.467
4840	14.4716	0	23630	70.6537	0	20538	61.4086	0	15845	47.3766	0	19651	58.7565	0	10406	31.1139	0	8742	26.1386	0	8101	24.222	0	15269	45.6543	0	13135	39.2737	0	37113	110.968	8.726e-16				2217	6.6288	0	44853	134.111	8.895e-16	8187	24.4791	0				23915	71.5058
4842	14.4776	0	23645	70.6985	0	20557	61.4654	0	15849	47.3885	0	19660	58.7834	0	10513	31.4339	0	8772	26.2283	0	8128	24.3027	0	15406	46.0639	3.191e-15	13207	39.4889	0	37116	110.977	0				2220	6.6378	8.439e-16	44942	134.377	6.527e-16	8203	24.527	0				23919	71.5178
4855	14.5165	0	23673	70.7823	0	20572	61.5103	0	15909	47.5679	0	19671	58.8163	0	10568	31.5983	0	8781	26.2552	0	8139	24.3356	0	15476	46.2732	0	13236	39.5756	0	37284	111.479	4.226e-16				2223	6.6468	0	45022	134.616	4.862e-16	8204	24.53	0				23924	71.5328
4861	14.5344	0	23689	70.8301	0	20664	61.7854	0	15939	47.6576	0	19730	58.9927	8.106e-15	10614	31.7359	0	8901	26.614	0	8143	24.3476	0	15646	46.7815	0	13252	39.6235	0	37790	112.992	0				2254	6.7395	1.864e-15	45126	134.927	0	8312	24.8529	0				23933	71.5597
4867	14.5523	0	23759	71.0394	0	20678	61.8272	0	16064	48.0314	0	19795	59.187	0	10638	31.8076	0	8936	26.7186	0	8147	24.3595	0	15647	46.7845	5.631e-16	13327	39.8477	0	37867	113.222	0				2276	6.8052	1.144e-15	45309	135.474	8.303e-16	8322	24.8828	0				23942	71.5866
4892	14.6271	0	23830	71.2517	0	20709	61.9199	0	16083	48.0882	0	19867	59.4023	0	10646	31.8315	0	8944	26.7426	0	8197	24.509	0	15719	46.9998	5.803e-16	13437	40.1766	0	37936	113.429	0				2280	6.8172	0	45530	136.135	0	8337	24.9276	0				23946	71.5985
4895	14.6361	0	23846	71.2995	0	20768	62.0963	0	16145	48.2736	0	19915	59.5459	0	10659	31.8704	0	9008	26.9339	0	8204	24.53	0	15763	47.1314	8.093e-15	13449	40.2125	0	38474	115.037	0				2287	6.8381	0	45952	137.397	0	8347	24.9575	0				23959	71.6374
4898	14.645	0	23917	71.5118	0	20895	62.4761	0	16173	48.3573	0	19934	59.6027	0	10690	31.9631	0	9027	26.9907	0	8213	24.5569	3.073e-15	15775	47.1673	4.797e-16	13531	40.4577	0	38742	115.839	5.449e-16				2288	6.8411	6.266e-16	46384	138.688	0	8357	24.9874	0				23964	71.6524
4908	14.6749	0	23921	71.5238	0	20977	62.7212	0	16179	48.3752	0	19962	59.6864	0	10739	32.1096	0	9083	27.1582	0	8217	24.5688	0	15826	47.3197	0	13563	40.5534	0	38901	116.314	0				2289	6.8441	0	46812	139.968	0	8359	24.9934	0				23970	71.6703
4924	14.7228	0	23975	71.6852	0	21246	63.5255	0	16218	48.4918	0	20022	59.8658	0	10753	32.1515	0	9090	27.1791	0	8246	24.6555	5.097e-15	15833	47.3407	1.01e-15	13644	40.7956	0	38936	116.419	0				2315	6.9219	0	47132	140.925	8.209e-16	8424	25.1878	0				23972	71.6763
4939	14.7676	0	24063	71.9484	0	21254	63.5495	0	16283	48.6862	0	20080	60.0392	0	10769	32.1993	0	9101	27.212	0	8252	24.6735	3.781e-15	15869	47.4483	0	13655	40.8285	0	39206	117.226	0				2323	6.9458	0	47624	142.396	0	8433	25.2147	0				23973	71.6793
4950	14.8005	0	24364	72.8484	0	21269	63.5943	0	16314	48.7789	0	20085	60.0541	0	10771	32.2053	0	9153	27.3675	0	8282	24.7632	0	15924	47.6128	0	13739	41.0796	0	39359	117.683	0				2327	6.9577	0	47654	142.486	0	8446	25.2535	0				23985	71.7151
4952	14.8065	0	24441	73.0786	0	21273	63.6063	0	16343	48.8656	0	20383	60.9452	0	10778	32.2262	0	9160	27.3884	0	8296	24.805	1.471e-15	15945	47.6756	0	13808	41.2859	0	39365	117.701	0				2328	6.9607	4.968e-16	47901	143.224	0	8457	25.2864	0				23990	71.7301
4964	14.8424	0	24641	73.6766	0	21309	63.7139	0	16359	48.9134	0	20430	61.0857	0	10850	32.4415	0	9393	28.0851	0	8360	24.9964	0	15997	47.831	0	13848	41.4055	0	39483	118.054	0				2346	7.0145	8.339e-15	47972	143.436	0	8512	25.4509	0				23991	71.7331
4983	14.8992	0	24667	73.7543	0	21382	63.9322	0	16365	48.9314	0	20442	61.1216	0	10881	32.5342	0	9408	28.1299	0	8401	25.119	0	16139	48.2556	1.666e-14	13909	41.5879	0	39516	118.153	0				2361	7.0594	0	48455	144.88	1.338e-15	8528	25.4987	0				24006	71.7779
5000	14.95	0	24693	73.8321	0	21391	63.9591	0	16380	48.9762	0	20449	61.1425	0	10890	32.5611	0	9409	28.1329	0	8406	25.1339	0	16182	48.3842	0	14062	42.0454	0	39594	118.386	0				2372	7.0923	0	48770	145.822	0	8562	25.6004	0				24013	71.7989
5007	14.9709	0	24858	74.3254	0	21474	64.2073	0	16408	49.0599	0	20615	61.6388	1.565e-15	11009	32.9169	0	9415	28.1509	0	8462	25.3014	0	16240	48.5576	0	14114	42.2009	6.299e-16	39703	118.712	0				2379	7.1132	1.538e-15	48774	145.834	0	8605	25.729	0				24016	71.8078
5027	15.0307	0	25189	75.3151	0	21680	64.8232	0	16496	49.323	0	20740	62.0126	0	11065	33.0844	0	9420	28.1658	4.683e-16	8476	25.3432	0	16430	49.1257	1.118e-14	14252	42.6135	0	39708	118.727	6.266e-16				2393	7.1551	0	49623	148.373	3.601e-14	8618	25.7678	0				24025	71.8347
5033	15.0487	0	25265	75.5423	0	21750	65.0325	0	16501	49.338	0	21004	62.802	0	11087	33.1501	0	9442	28.2316	0	8477	25.3462	0	16435	49.1407	0	14309	42.7839	0	39926	119.379	0				2399	7.173	0	50313	150.436	0	8644	25.8456	0				24039	71.8766
5036	15.0576	0	25356	75.8144	0	21860	65.3614	0	16566	49.5323	0	21167	63.2893	0	11108	33.2129	0	9478	28.3392	0	8541	25.5376	0	16994	50.8121	0	14467	43.2563	5.064e-16	40199	120.195	0				2405	7.1909	1.565e-15	50428	150.78	7.251e-16	8663	25.9024	6.706e-16				24067	71.9603
5039	15.0666	0	25378	75.8802	0	21882	65.4272	0	16601	49.637	0	21350	63.8365	0	11155	33.3535	0	9516	28.4528	0	8545	25.5495	0	17039	50.9466	0	14496	43.343	0	40220	120.258	0				2407	7.1969	5.499e-16	50895	152.176	0	8720	26.0728	0				24079	71.9962
5050	15.0995	0	25381	75.8892	0	21907	65.5019	0	16666	49.8313	0	21356	63.8544	0	11220	33.5478	0	9532	28.5007	1.326e-15	8640	25.8336	0	17110	51.1589	3.104e-15	14539	43.4716	2.755e-15	40396	120.784	0				2409	7.2029	0	51249	153.234	4.661e-16	8735	26.1177	0				24082	72.0052
5076	15.1772	0	25492	76.2211	0	21940	65.6006	0	16694	49.9151	0	21360	63.8664	2.491e-15	11352	33.9425	0	9580	28.6442	0	8662	25.8994	0	17181	51.3712	0	14588	43.6181	0	40461	120.978	0				2416	7.2238	1.793e-15	51250	153.238	0	8770	26.2223	0				24087	72.0201
5078	15.1832	0	25653	76.7025	0	21988	65.7441	0	16759	50.1094	0	21446	64.1235	0	11372	34.0023	0	9631	28.7967	0	8690	25.9831	0	17213	51.4669	1.632e-15	14625	43.7287	0	40494	121.077	0				2418	7.2298	0	51387	153.647	2.372e-15	8774	26.2343	0				24100	72.059
5085	15.2042	0	25737	76.9536	0	21991	65.7531	0	16844	50.3636	0	21618	64.6378	0	11383	34.0352	0	9639	28.8206	5.558e-16	8702	26.019	0	17360	51.9064	0	14637	43.7646	0	40638	121.508	0				2453	7.3345	7.219e-15	51520	154.045	0	8846	26.4495	0				24103	72.068
5099	15.246	0	25940	77.5606	0	22000	65.78	0	16882	50.4772	0	21889	65.4481	0	11450	34.2355	0	9671	28.9163	0	8755	26.1775	0	17450	52.1755	9.704e-16	14731	44.0457	4.654e-16	40760	121.872	0				2459	7.3524	8.557e-16	51607	154.305	0	8859	26.4884	0				24104	72.071
5153	15.4075	0	26045	77.8745	0	22098	66.073	0	17080	51.0692	0	22459	67.1524	0	11592	34.6601	0	9801	29.305	0	8785	26.2672	0	17562	52.5104	0	14741	44.0756	0	40953	122.45	0				2471	7.3883	1.207e-14	51721	154.646	0	8874	26.5333	0				24106	72.0769
5184	15.5002	0	26126	78.1167	0	22129	66.1657	0	17103	51.138	0	22561	67.4574	0	11597	34.675	0	9896	29.589	0	8795	26.297	5.153e-16	17872	53.4373	0	14775	44.1773	7.553e-16	41016	122.638	0				2483	7.4242	0	52380	156.616	2.015e-15	8890	26.5811	0				24116	72.1068
5187	15.5091	0	26129	78.1257	0	22191	66.3511	0	17110	51.1589	0	22661	67.7564	0	11600	34.684	0	9897	29.592	0	8821	26.3748	1.716e-15	17911	53.5539	0	14880	44.4912	0	41311	123.52	0				2490	7.4451	1.636e-15	52591	157.247	0	9030	26.9997	0				24119	72.1158
5224	15.6198	0	26155	78.2035	0	22204	66.39	0	17204	51.44	0	22674	67.7953	0	11608	34.7079	0	9920	29.6608	0	8918	26.6648	0	17950	53.6705	0	14902	44.557	0	41746	124.82	0				2499	7.472	3.34e-15	52980	158.41	0	9050	27.0595	0				24124	72.1308
5240	15.6676	0	26208	78.3619	0	22214	66.4199	0	17241	51.5506	0	22849	68.3185	0	11799	35.279	0	9931	29.6937	0	8937	26.7216	0	18323	54.7858	2.732e-15	14913	44.5899	0	41864	125.173	0				2506	7.4929	0	53063	158.658	0	9082	27.1552	0				24133	72.1577
5242	15.6736	0	26221	78.4008	0	22222	66.4438	0	17266	51.6253	0	22875	68.3962	0	11880	35.5212	0	9933	29.6997	0	8999	26.907	0	18366	54.9143	1.505e-15	14949	44.6975	0	42122	125.945	0				2517	7.5258	0	53923	161.23	0	9187	27.4691	0				24137	72.1696
5261	15.7304	0	26233	78.4367	0	22301	66.68	0	17320	51.7868	0	22922	68.5368	0	11896	35.569	0	9936	29.7086	0	9025	26.9848	0	18505	55.33	6.461e-16	14951	44.7035	1.833e-15	42165	126.073	0				2520	7.5348	3.86e-15	54547	163.095	0	9226	27.5857	0				24143	72.1876
5266	15.7453	0	26300	78.637	0	22317	66.7278	0	17413	52.0649	0	23121	69.1318	0	11957	35.7514	0	9959	29.7774	0	9067	27.1103	0	18522	55.3808	0	14960	44.7304	0	42166	126.076	0				2534	7.5767	0	54620	163.314	0	9268	27.7113	0				24148	72.2025
5278	15.7812	0	26549	79.3815	0	22366	66.8743	0	17438	52.1396	0	23168	69.2723	2.335e-15	12013	35.9189	0	9980	29.8402	0	9074	27.1313	0	18560	55.4944	6.881e-15	15012	44.8859	0	42311	126.51	0				2537	7.5856	0	54679	163.49	0	9295	27.792	0				24150	72.2085
5290	15.8171	0	26559	79.4114	0	22378	66.9102	0	17533	52.4237	0	23243	69.4966	0	12032	35.9757	0	9997	29.891	0	9100	27.209	8.816e-16	18561	55.4974	0	15273	45.6663	0	42472	126.991	0				2550	7.6245	4.796e-16	55083	164.698	1.891e-15	9356	27.9744	0				24162	72.2444
5297	15.838	0	26571	79.4473	0	22403	66.985	0	17692	52.8991	0	23359	69.8434	0	12108	36.2029	0	10017	29.9508	2.552e-15	9131	27.3017	1.058e-15	18579	55.5512	0	15340	45.8666	0	42479	127.012	0				2561	7.6574	0	55417	165.697	1.775e-15	9380	28.0462	0				24164	72.2504
5299	15.844	0	26586	79.4921	0	22454	67.1375	0	18001	53.823	0	23403	69.975	0	12130	36.2687	0	10022	29.9658	0	9135	27.3136	0	18588	55.5781	4.615e-15	15351	45.8995	0	42623	127.443	6.855e-15				2572	7.6903	0	55769	166.749	0	9396	28.094	0				24172	72.2743
5303	15.856	0	26629	79.6207	0	22548	67.4185	0	18014	53.8619	0	23500	70.265	8.154e-16	12165	36.3734	0	10070	30.1093	0	9145	27.3436	0	18610	55.6439	0	15416	46.0938	0	42676	127.601	0				2577	7.7052	5.732e-16	56019	167.497	4.89e-16	9485	28.3602	0				24175	72.2832
5355	16.0114	0	26652	79.6895	0	22627	67.6547	0	18147	54.2595	0	23594	70.5461	0	12170	36.3883	0	10099	30.196	0	9147	27.3495	8.207e-16	18914	56.5529	5.136e-16	15433	46.1447	8.569e-16	42924	128.343	0				2585	7.7291	0	56267	168.238	1.171e-15	9503	28.414	0				24180	72.2982
5360	16.0264	0	26669	79.7403	0	22665	67.7683	0	18187	54.3791	0	23625	70.6388	0	12175	36.4032	0	10115	30.2439	0	9150	27.3585	0	18915	56.5558	0	15439	46.1626	0	42994	128.552	0				2594	7.7561	0	56471	168.848	0	9530	28.4947	1.686e-15				24187	72.3191
5367	16.0473	0	26699	79.83	0	22667	67.7743	0	18242	54.5436	0	23679	70.8002	0	12187	36.4391	0	10144	30.3306	0	9165	27.4033	0	18993	56.7891	0	15470	46.2553	0	43300	129.467	0				2597	7.765	0	56487	168.896	0	9563	28.5934	0				24195	72.3431
5386	16.1041	0	26714	79.8749	0	22760	68.0524	0	18244	54.5496	0	23762	71.0484	0	12211	36.5109	0	10148	30.3425	0	9175	27.4333	0	19027	56.8907	0	15697	46.934	0	43485	130.02	0				2600	7.774	0	56861	170.014	1.886e-15	9600	28.704	0				24199	72.355
5388	16.1101	0	26747	79.9735	0	22765	68.0674	0	18345	54.8516	0	23961	71.6434	0	12267	36.6783	0	10159	30.3754	0	9234	27.6097	0	19059	56.9864	0	15803	47.251	0	43616	130.412	0				2606	7.7919	8.685e-16	56872	170.047	0	9619	28.7608	0				24206	72.3759
5396	16.134	0	26910	80.4609	0	22882	68.4172	0	18468	55.2193	0	24208	72.3819	0	12315	36.8218	0	10201	30.501	0	9243	27.6366	0	19160	57.2884	0	15818	47.2958	0	43662	130.549	0				2621	7.8368	0	56912	170.167	5.805e-16	9688	28.9671	0				24214	72.3999
5399	16.143	0	27046	80.8675	0	22887	68.4321	0	18499	55.312	0	24216	72.4058	0	12359	36.9534	0	10294	30.7791	0	9294	27.7891	0	19194	57.3901	5.541e-15	15891	47.5141	0	44095	131.844	0				2623	7.8428	7.928e-16	56955	170.295	3.784e-15	9694	28.9851	0				24224	72.4298
5430	16.2357	0	27105	81.0439	0	22917	68.5218	0	18519	55.3718	0	24223	72.4268	0	12367	36.9773	0	10327	30.8777	0	9312	27.8429	0	19405	58.0209	0	15954	47.7025	0	44217	132.209	0				2634	7.8757	6.149e-16	57005	170.445	0	9776	29.2302	0				24236	72.4656
5435	16.2507	0	27242	81.4536	0	22937	68.5816	0	18579	55.5512	0	24385	72.9112	0	12401	37.079	0	10430	31.1857	0	9340	27.9266	0	19520	58.3648	0	15973	47.7593	0	44285	132.412	0				2639	7.8906	8.009e-16	57579	172.161	0	9782	29.2482	0				24238	72.4716
5437	16.2566	0	27252	81.4835	0	22948	68.6145	0	18585	55.5692	0	24404	72.968	3.048e-15	12404	37.088	0	10436	31.2036	0	9429	28.1927	5.254e-16	19590	58.5741	0	16010	47.8699	5.626e-16	44352	132.613	0				2642	7.8996	0	57637	172.335	0	9851	29.4545	0				24250	72.5075
5446	16.2835	0	27468	82.1293	0	23046	68.9075	0	18606	55.6319	0	24450	73.1055	0	12524	37.4468	0	10465	31.2904	0	9446	28.2435	0	19622	58.6698	0	16308	48.7609	0	44362	132.642	0				2644	7.9056	0	57798	172.816	0	9868	29.5053	0				24253	72.5165
5465	16.3404	0	27555	82.3894	0	23049	68.9165	0	18650	55.7635	0	24454	73.1175	0	12530	37.4647	0	10470	31.3053	0	9466	28.3033	0	19692	58.8791	0	16324	48.8088	0	44420	132.816	0				2652	7.9295	3.861e-16	57799	172.819	0	9899	29.598	0				24257	72.5284
5485	16.4002	0	27628	82.6077	0	23088	69.0331	0	18736	56.0206	0	24462	73.1414	0	12573	37.5933	0	10480	31.3352	0	9573	28.6233	0	19708	58.9269	1.423e-15	16358	48.9104	0	44512	133.091	0				2660	7.9534	0	57856	172.989	0	9916	29.6488	0				24263	72.5464
5498	16.439	0	27827	83.2027	0	23090	69.0391	0	18775	56.1373	1.672e-15	24470	73.1653	0	12582	37.6202	0	10481	31.3382	0	9577	28.6352	4.467e-16	19720	58.9628	0	16362	48.9224	0	44548	133.198	4.152e-15				2669	7.9803	4.723e-16	57994	173.402	0	9928	29.6847	0				24275	72.5823
5505	16.4599	0	28672	85.7293	0	23160	69.2484	0	18777	56.1432	0	24478	73.1892	0	12583	37.6232	0	10534	31.4967	0	9635	28.8087	0	19885	59.4562	0	16388	49.0001	0	44959	134.427	3.964e-15				2672	7.9893	0	58141	173.842	0	9958	29.7744	0				24280	72.5972
5586	16.7021	0	28709	85.8399	0	23215	69.4129	0	18813	56.2509	0	24580	73.4942	0	12593	37.6531	0	10700	31.993	0	9653	28.8625	3.872e-16	19920	59.5608	7.029e-16	16457	49.2064	0	44987	134.511	1.447e-15				2703	8.082	1.462e-15	58258	174.191	0	9992	29.8761	0				24282	72.6032
5591	16.7171	0	29001	86.713	0	23399	69.963	0	18826	56.2897	0	24657	73.7244	0	12634	37.7757	0	10725	32.0678	0	9664	28.8954	0	19935	59.6057	0	16642	49.7596	0	45264	135.339	0				2710	8.1029	0	58384	174.568	0	10001	29.903	0				24287	72.6181
5609	16.7709	0	29032	86.8057	0	23641	70.6866	0	18874	56.4333	0	24732	73.9487	0	12701	37.976	0	10732	32.0887	0	9680	28.9432	3.842e-16	19977	59.7312	0	16730	50.0227	0	45333	135.546	0				2719	8.1298	7.47e-16	58392	174.592	1.503e-15	10121	30.2618	0				24313	72.6959
5624	16.8158	0	29228	87.3917	0	23855	71.3264	0	18984	56.7622	0	24756	74.0204	2.171e-14	12709	37.9999	0	10735	32.0977	0	9701	29.006	8.362e-16	20208	60.4219	0	16841	50.3546	0	45356	135.614	0				2723	8.1418	0	58685	175.468	1.357e-15	10207	30.5189	0				24316	72.7048
5642	16.8696	0	29232	87.4037	0	24055	71.9245	0	19072	57.0253	0	24762	74.0384	0	12737	38.0836	0	10769	32.1993	0	9766	29.2003	4.05e-16	20317	60.7478	0	16853	50.3905	0	45442	135.872	0				2724	8.1448	0	59190	176.978	0	10210	30.5279	0				24332	72.7527
5656	16.9114	0	29238	87.4216	0	24071	71.9723	0	19094	57.0911	0	25004	74.762	3.575e-15	12764	38.1644	0	10900	32.591	0	9832	29.3977	0	20323	60.7658	0	16868	50.4353	0	45700	136.643	0				2730	8.1627	0	59502	177.911	0	10268	30.7013	0				24349	72.8035
5675	16.9683	0	29265	87.5024	0	24080	71.9992	0	19156	57.2764	0	25058	74.9234	0	12795	38.257	0	10952	32.7465	0	9840	29.4216	0	20363	60.8854	0	16869	50.4383	0	46156	138.006	0				2737	8.1836	0	59577	178.135	0	10279	30.7342	0				24404	72.968
5715	17.0878	0	29272	87.5233	0	24155	72.2234	0	19336	57.8146	0	25118	75.1028	0	12798	38.266	0	10958	32.7644	0	9892	29.5771	0	20505	61.31	0	16871	50.4443	0	46260	138.317	0				2741	8.1956	0	60328	180.381	0	10283	30.7462	0				24469	73.1623
5723	17.1118	0	29283	87.5562	0	24157	72.2294	0	19384	57.9582	9.193e-15	25295	75.6321	0	12851	38.4245	0	10973	32.8093	0	9895	29.5861	0	20619	61.6508	0	16910	50.5609	0	46322	138.503	0				2744	8.2046	3.969e-16				10317	30.8478	0				24491	73.2281
5726	17.1207	0	29290	87.5771	0	24223	72.4268	0	19416	58.0538	0	25472	76.1613	0	12886	38.5291	0	11008	32.9139	0	9904	29.613	0	20630	61.6837	0	16923	50.5998	0	46380	138.676	0				2748	8.2165	0				10335	30.9017	0				24494	73.2371
5754	17.2045	0	29296	87.595	0	24236	72.4656	0	19444	58.1376	0	25705	76.858	0	12946	38.7085	0	11019	32.9468	0	9947	29.7415	0	20694	61.8751	0	17021	50.8928	0	46584	139.286	0				2763	8.2614	9.953e-16				10375	31.0213	0				24498	73.249
5825	17.4168	0	29335	87.7117	0	24288	72.6211	0	19454	58.1675	0	25888	77.4051	0	12981	38.8132	0	11057	33.0604	0	9993	29.8791	5.698e-16	20734	61.9947	0	17057	51.0004	0	46653	139.493	5.095e-16				2767	8.2733	8.204e-16				10394	31.0781	0				24501	73.258
5828	17.4257	0	29337	87.7176	0	24338	72.7706	0	19509	58.3319	0	26352	78.7925	0	12983	38.8192	0	11073	33.1083	0	9998	29.894	0	20777	62.1232	4.163e-16	17060	51.0094	3.948e-16	46985	140.485	0				2772	8.2883	5.08e-15				10413	31.1349	0				24504	73.267
5836	17.4496	0	29340	87.7266	0	24374	72.8783	0	19523	58.3738	0	26515	79.2798	0	13072	39.0853	0	11077	33.1202	0	10003	29.909	0	20890	62.4611	0	17223	51.4968	0	46988	140.494	0				2859	8.5484	6.243e-16				10460	31.2754	0				24508	73.2789
5847	17.4825	0	29350	87.7565	0	24420	73.0158	0	19562	58.4904	0	26653	79.6925	0	13128	39.2527	0	11081	33.1322	0	10007	29.9209	0	20932	62.5867	0	17341	51.8496	1.613e-15	47091	140.802	0				2881	8.6142	0				10490	31.3651	0				24511	73.2879
5943	17.7696	0	29390	87.8761	0	24644	73.6856	0	19579	58.5412	0	26843	80.2606	0	13176	39.3962	0	11102	33.195	0	10028	29.9837	4.42e-16	20937	62.6016	0	17350	51.8765	0	47226	141.206	0				2884	8.6232	0				10536	31.5026	0				24516	73.3028
5949	17.7875	0	29403	87.915	0	24650	73.7035	0	19630	58.6937	0	26849	80.2785	8.39e-16	13306	39.7849	0	11105	33.2039	0	10041	30.0226	0	20942	62.6166	0	17356	51.8944	0	47388	141.69	0				2888	8.6351	0				10555	31.5595	0				24519	73.3118
6010	17.9699	0	29406	87.9239	0	24680	73.7932	0	19642	58.7296	0	27280	81.5672	0	13384	40.0182	0	11120	33.2488	0	10091	30.1721	1.935e-15	20965	62.6853	0	17516	52.3728	0	47518	142.079	0				2889	8.6381	1.382e-15				10591	31.6671	0				24525	73.3298
6016	17.9878	0	29413	87.9449	0	24695	73.838	0	19666	58.8013	0	27458	82.0994	0	13499	40.362	0	11129	33.2757	3.927e-16	10094	30.1811	4.437e-16	21023	62.8588	8.044e-16	17548	52.4685	0	47865	143.116	0				2907	8.6919	4.369e-16				10603	31.703	0				24528	73.3387
6072	18.1553	0	29433	88.0047	0	24706	73.8709	0	19678	58.8372	0	27465	82.1204	0	13502	40.371	0	11132	33.2847	0	10128	30.2827	0	21024	62.8618	0	17567	52.5253	4.87e-15	48095	143.804	0				2910	8.7009	0				10612	31.7299	0				24535	73.3597
6088	18.2031	0	29500	88.205	0	24774	74.0743	0	19683	58.8522	0	27771	83.0353	0	13504	40.377	0	11164	33.3804	5.162e-16	10181	30.4412	0	21039	62.9066	5.761e-16	17577	52.5552	0	48098	143.813	0				2915	8.7158	0				10616	31.7418	0				24536	73.3626
6095	18.2241	0	29582	88.4502	0	24878	74.3852	0	19696	58.891	0	27880	83.3612	0	13510	40.3949	0	11171	33.4013	0	10289	30.7641	0	21068	62.9933	0	17614	52.6659	0	48151	143.971	0				2921	8.7338	1.124e-15				10633	31.7927	0				24540	73.3746
6102	18.245	0	29595	88.4891	0	25033	74.8487	0	19702	58.909	0	28285	84.5722	0	13529	40.4517	0	11249	33.6345	1.13e-15	10356	30.9644	0	21086	63.0471	0	17644	52.7556	0	48383	144.665	0				2927	8.7517	0				10640	31.8136	0				24542	73.3806
6129	18.3257	0	29611	88.5369	0	25096	75.037	0	19705	58.9179	0	28367	84.8173	3.138e-15	13560	40.5444	0	11262	33.6734	0	10424	31.1678	0	21109	63.1159	0	17700	52.923	0	48569	145.221	0				2932	8.7667	0				10675	31.9183	0				24547	73.3955
6168	18.4423	0	29648	88.6475	0	25143	75.1776	0	19712	58.9389	0	28393	84.8951	6.476e-16	13614	40.7059	0	11299	33.784	0	10446	31.2335	0	21120	63.1488	1.239e-15	17743	53.0516	4.624e-16	48731	145.706	0				2950	8.8205	6.206e-15				10705	32.008	0				24548	73.3985
6211	18.5709	0	29653	88.6625	0	25153	75.2075	0	19719	58.9598	0	28522	85.2808	0	13641	40.7866	0	11357	33.9574	0	10479	31.3322	0	21153	63.2475	0	17843	53.3506	0	48832	146.008	6.684e-16				2953	8.8295	0				10713	32.0319	0				24554	73.4165
6221	18.6008	0	29928	89.4847	0	25164	75.2404	0	19781	59.1452	0	28552	85.3705	0	13696	40.951	0	11367	33.9873	0	10554	31.5565	0	21182	63.3342	0	17861	53.4044	0	48918	146.265	0				2965	8.8653	3.198e-15				10732	32.0887	0				24555	73.4194
6229	18.6247	0	30001	89.703	0	25200	75.348	0	19800	59.202	0	28589	85.4811	0	13709	40.9899	0	11388	34.0501	0	10567	31.5953	0	21270	63.5973	0	17882	53.4672	0	48923	146.28	0				2994	8.9521	7.185e-16				10735	32.0977	0				24567	73.4553
6236	18.6456	0	30017	89.7508	0	25235	75.4527	0	19882	59.4472	0	28654	85.6755	0	13758	41.1364	0	11392	34.0621	0	10648	31.8375	0	21300	63.687	0	17956	53.6884	0	49040	146.63	0				3002	8.976	0				10749	32.1395	0				24569	73.4613
6266	18.7353	0	30096	89.987	0	25262	75.5334	0	19884	59.4532	0	28807	86.1329	0	13763	41.1514	0	11422	34.1518	0	10651	31.8465	1.657e-15	21372	63.9023	0	18030	53.9097	0	49277	147.338	0				3026	9.0477	1.969e-15				10795	32.2771	0				24572	73.4703
6291	18.8101	0	30142	90.1246	0	25287	75.6081	0	20088	60.0631	0	28858	86.2854	0	13815	41.3068	0	11446	34.2235	0	10664	31.8854	7.353e-15	21409	64.0129	0	18117	54.1698	0	49329	147.494	0				3036	9.0776	0				10828	32.3757	0				24575	73.4793
6403	19.145	0	30241	90.4206	0	25376	75.8742	0	20130	60.1887	0	28919	86.4678	0	13822	41.3278	0	11478	34.3192	0	10707	32.0139	3.905e-16	21495	64.27	0	18250	54.5675	7.621e-16	49363	147.595	0				3040	9.0896	0				10882	32.5372	0				24576	73.4822
6418	19.1898	0	30284	90.5492	0	25393	75.9251	0	20228	60.4817	0	28927	86.4917	0	13826	41.3397	0	11500	34.385	0	10711	32.0259	0	21499	64.282	0	18393	54.9951	4.462e-16	49442	147.832	0				3043	9.0986	0				10927	32.6717	0				24579	73.4912
6422	19.2018	0	30305	90.612	0	25563	76.4334	0	20233	60.4967	0	29123	87.0778	0	13880	41.5012	0	11529	34.4717	0	10736	32.1006	0	21517	64.3358	0	18437	55.1266	0	49741	148.726	4.619e-16				3044	9.1016	0				10983	32.8392	0				24582	73.5002
6430	19.2257	0	30342	90.7226	0	25756	77.0104	0	20243	60.5266	0	29231	87.4007	0	14127	42.2397	0	11559	34.5614	0	10756	32.1604	0	21544	64.4166	0	18487	55.2761	4.957e-16	49870	149.111	0				3052	9.1255	2.042e-15				11008	32.9139	0				24586	73.5121
6457	19.3064	0	30391	90.8691	0	25945	77.5756	0	20260	60.5774	0	29397	87.897	0	14159	42.3354	0	11602	34.69	0	10768	32.1963	0	21584	64.5362	0	18543	55.4436	0	49896	149.189	0				3055	9.1344	1.011e-15				11037	33.0006	0				24591	73.5271
6478	19.3692	0	30394	90.8781	0	26025	77.8148	0	20270	60.6073	0	29598	88.498	5.144e-15	14178	42.3922	0	11631	34.7767	3.353e-15	10776	32.2202	0	21603	64.593	4.182e-15	18582	55.5602	0	50011	149.533	0				3065	9.1644	0				11120	33.2488	0				24593	73.5331
6488	19.3991	0	30398	90.89	0	26153	78.1975	0	20315	60.7418	0	29610	88.5339	0	14226	42.5357	0	11669	34.8903	0	10790	32.2621	0	21604	64.596	0	18597	55.605	0	50053	149.659	0				3074	9.1913	8.99e-15				11141	33.3116	0				24595	73.5391
6545	19.5695	0	30401	90.899	0	26219	78.3948	0	20393	60.9751	0	29676	88.7312	8.573e-16	14246	42.5955	0	11683	34.9322	0	10801	32.295	0	21693	64.8621	0	18616	55.6618	0	50134	149.901	0				3083	9.2182	0				11225	33.5628	0				24598	73.548
6546	19.5725	0	30419	90.9528	0	26252	78.4935	0	20405	61.011	0	29700	88.803	0	14289	42.7241	0	11815	35.3269	0	10815	32.3368	0	21797	65.173	0	18709	55.9399	0	50173	150.017	0				3106	9.2869	0				11229	33.5747	0				24602	73.56
6586	19.6921	0	30425	90.9707	0	26407	78.9569	0	20409	61.0229	0	29756	88.9704	0	14318	42.8108	0	11842	35.4076	0	10827	32.3727	0	21836	65.2896	0	18714	55.9549	6.033e-16	50275	150.322	0				3110	9.2989	0				11333	33.8857	0				24607	73.5749
6620	19.7938	0	30447	91.0365	0	26532	79.3307	0	20411	61.0289	0	29932	89.4967	0	14321	42.8198	0	11880	35.5212	0	10876	32.5192	4.033e-16	22054	65.9415	9.786e-16	18728	55.9967	0	50382	150.642	0				3112	9.3049	0				11352	33.9425	0				24611	73.5869
6634	19.8357	0	30454	91.0575	0	26883	80.3802	0	20427	61.0767	0	29963	89.5894	0	14371	42.9693	0	11902	35.587	0	10889	32.5581	0	22321	66.7398	0	18854	56.3735	0	51240	153.208	0				3114	9.3109	0				11355	33.9515	0				24612	73.5899
6638	19.8476	0	30463	91.0844	0	27093	81.0081	0	20479	61.2322	0	30025	89.7747	0	14434	43.1577	0	11937	35.6916	0	10953	32.7495	0	22322	66.7428	0	18930	56.6007	0	51295	153.372	0				3121	9.3318	9.687e-16				11365	33.9813	0				24615	73.5988
6662	19.9194	0	30472	91.1113	0	27389	81.8931	0	20481	61.2382	0	30043	89.8286	0	14468	43.2593	0	11984	35.8322	0	10984	32.8422	0	22336	66.7846	0	18999	56.807	1.257e-15	51519	154.042	0				3122	9.3348	0				11386	34.0441	0				24619	73.6108
6664	19.9254	0	30493	91.1741	0	27574	82.4463	0	20504	61.307	0	30061	89.8824	0	14545	43.4896	0	12001	35.883	0	11024	32.9618	0	22351	66.8295	0	19001	56.813	0	51660	154.463	0				3141	9.3916	2.758e-15				11415	34.1309	0				24626	73.6317
6667	19.9343	0	30499	91.192	0	27596	82.512	0	20531	61.3877	0	30128	90.0827	0	14568	43.5583	0	12067	36.0803	0	11026	32.9677	0	22441	67.0986	0	19075	57.0343	7.597e-16	51725	154.658	0				3150	9.4185	4.753e-16				11438	34.1996	0				24637	73.6646
6727	20.1137	0	30502	91.201	0	27741	82.9456	0	20553	61.4535	0	30276	90.5252	0	14643	43.7826	0	12079	36.1162	0	11065	33.0844	0	22464	67.1674	5.137e-16	19082	57.0552	0	51729	154.67	0				3152	9.4245	0				11464	34.2774	0				24640	73.6736
6732	20.1287	0	30508	91.2189	0	27890	83.3911	0	20563	61.4834	0	30438	91.0096	0	14692	43.9291	0	12116	36.2268	0	11066	33.0873	0	22473	67.1943	7.677e-16	19158	57.2824	0	51854	155.043	2.015e-15				3156	9.4364	0				11689	34.9501	0				24645	73.6886
6736	20.1406	0	30525	91.2698	0	27973	83.6393	0	20588	61.5581	0	30571	91.4073	7.49e-16	14721	44.0158	0	12130	36.2687	0	11226	33.5657	0	22567	67.4753	0	19191	57.3811	0	52624	157.346	1.778e-15				3163	9.4574	0				11813	35.3209	0				24655	73.7185
6814	20.3739	0	30555	91.3594	0	28006	83.7379	0	20591	61.5671	0	30614	91.5359	0	14738	44.0666	0	12144	36.3106	0	11229	33.5747	0	22580	67.5142	0	19277	57.6382	0	52866	158.069	0				3166	9.4663	0				11865	35.4764	0				24657	73.7244
6844	20.4636	0	30561	91.3774	0	28059	83.8964	0	20627	61.6747	0	30652	91.6495	0	14805	44.267	0	12147	36.3195	0	11258	33.6614	0	22722	67.9388	0	19279	57.6442	0	52942	158.297	0				3176	9.4962	0				11871	35.4943	0				24659	73.7304
6852	20.4875	0	30570	91.4043	0	28070	83.9293	0	20663	61.7824	0	30966	92.5883	0	14807	44.2729	0	12150	36.3285	0	11280	33.7272	0	22868	68.3753	0	19387	57.9671	0	52949	158.317	0				3177	9.4992	1.238e-15				11914	35.6229	0				24661	73.7364
6859	20.5084	0	30572	91.4103	0	28092	83.9951	0	20668	61.7973	0	31550	94.3345	0	14837	44.3626	0	12153	36.3375	0	11294	33.7691	0	22941	68.5936	0	19481	58.2482	0	53103	158.778	0				3196	9.556	0				11919	35.6378	0				24663	73.7424
6953	20.7895	0	30592	91.4701	0	28167	84.2193	0	20707	61.9139	0	31552	94.3405	0	14844	44.3836	0	12188	36.4421	0	11298	33.781	0	22945	68.6055	0	19519	58.3618	0	53232	159.164	0				3200	9.568	1.18e-15				11959	35.7574	0				24667	73.7543
6958	20.8044	0	30605	91.5089	0	28196	84.306	0	20748	62.0365	0	31586	94.4421	0	14858	44.4254	0	12196	36.466	0	11341	33.9096	0	22948	68.6145	0	19539	58.4216	0	53313	159.406	0				3209	9.5949	4.366e-16				11963	35.7694	0				24670	73.7633
6978	20.8642	0	30617	91.5448	0	28240	84.4376	0	20790	62.1621	0	31602	94.49	0	14874	44.4733	0	12210	36.5079	2.674e-15	11368	33.9903	2.985e-15	22987	68.7311	0	19559	58.4814	5.148e-16	53337	159.478	0				3231	9.6607	0				12013	35.9189	0				24674	73.7753
7005	20.9449	0	30622	91.5598	0	28306	84.6349	0	20829	62.2787	0	31607	94.5049	0	14878	44.4852	0	12218	36.5318	0	11400	34.086	0	23098	69.063	0	19724	58.9748	0	53378	159.6	0				3233	9.6667	8.251e-16				12024	35.9518	0				24676	73.7812
7067	21.1303	0	30641	91.6166	0	28318	84.6708	0	20836	62.2996	0	31625	94.5588	0	14883	44.5002	0	12239	36.5946	0	11402	34.092	0	23182	69.3142	0	19776	59.1302	0	53673	160.482	0				3257	9.7384	0				12031	35.9727	0				24680	73.7932
7115	21.2738	0	30646	91.6315	0	28393	84.8951	0	20853	62.3505	0	31634	94.5857	0	14884	44.5032	0	12286	36.7351	0	11432	34.1817	0	23218	69.4218	0	19804	59.214	0	53853	161.02	0				3268	9.7713	0				12040	35.9996	0				24682	73.7992
7153	21.3875	0	30649	91.6405	0	28561	85.3974	0	20874	62.4133	0	31661	94.6664	2.96e-15	15002	44.856	0	12337	36.8876	0	11450	34.2355	0	23386	69.9241	0	20176	60.3262	0	54263	162.246	6.278e-16				3280	9.8072	0				12068	36.0833	0				24686	73.8111
7184	21.4802	0	30651	91.6465	0	28586	85.4721	0	20891	62.4641	0	31672	94.6993	0	15038	44.9636	0	12359	36.9534	0	11477	34.3162	0	23512	70.3009	0	20181	60.3412	0	54325	162.432	0				3299	9.864	0				12095	36.1641	0				24690	73.8231
7199	21.525	0	30655	91.6585	0	28645	85.6486	0	20945	62.6256	0	31883	95.3302	0	15055	45.0145	0	12363	36.9654	0	11528	34.4687	0	23551	70.4175	0	20209	60.4249	0	54356	162.524	0				3309	9.8939	0				12145	36.3135	0				24695	73.838
7208	21.5519	0	30671	91.7063	0	28736	85.9206	0	20952	62.6465	0	32140	96.0986	0	15104	45.161	0	12434	37.1777	0	11572	34.6003	1.206e-15	23704	70.875	0	20273	60.6163	0	54515	163	0				3311	9.8999	4.595e-16				12259	36.6544	0				24701	73.856
7238	21.6416	0	30693	91.7721	0	28886	86.3691	0	20956	62.6584	0	32504	97.187	0	15136	45.2566	0	12440	37.1956	0	11592	34.6601	0	23758	71.0364	0	20421	61.0588	5.241e-16	54683	163.502	0				3319	9.9238	2.309e-15				12314	36.8189	0				24703	73.862
7243	21.6566	0	30701	91.796	0	28919	86.4678	0	21019	62.8468	0	32542	97.3006	0	15165	45.3434	0	12573	37.5933	0	11599	34.681	0	23899	71.458	2.364e-15	20506	61.3129	0	54747	163.694	0				3328	9.9507	0				12318	36.8308	0				24704	73.865
7252	21.6835	0	30710	91.8229	0	29224	87.3798	0	21055	62.9545	0	32868	98.2753	0	15398	46.04	0	12607	37.6949	0	11609	34.7109	0	24045	71.8945	0	20521	61.3578	0	54885	164.106	0				3342	9.9926	0				12330	36.8667	0				24709	73.8799
7268	21.7313	0	30757	91.9634	0	29228	87.3917	0	21221	63.4508	0	32883	98.3202	0	15459	46.2224	0	12631	37.7667	0	11643	34.8126	0	24110	72.0889	0	20568	61.4983	0	55079	164.686	1.445e-15				3344	9.9986	0				12359	36.9534	0				24721	73.9158
7279	21.7642	0	30760	91.9724	0	29446	88.0435	0	21234	63.4897	0	33074	98.8913	0	15468	46.2493	0	12687	37.9341	0	11648	34.8275	0	24162	72.2444	6.612e-16	20627	61.6747	1.932e-15	55238	165.162	0				3347	10.0075	0				12381	37.0192	4.171e-16				24725	73.9278
7302	21.833	0	30767	91.9933	0	29455	88.0705	0	21265	63.5823	0	33103	98.978	0	15538	46.4586	6.97e-15	12703	37.982	0	11661	34.8664	0	24165	72.2533	0	20671	61.8063	0	55570	166.154	0				3351	10.0195	8.331e-16				12396	37.064	0				24728	73.9367
7323	21.8958	0	30769	91.9993	0	29607	88.5249	0	21454	64.1475	0	33156	99.1364	0	15563	46.5334	0	12736	38.0806	0	11738	35.0966	1.088e-15	24191	72.3311	0	20697	61.884	0	55732	166.639	0				3362	10.0524	0				12439	37.1926	0				24733	73.9517
7326	21.9047	0	30784	92.0442	0	29727	88.8837	0	21484	64.2372	0	33171	99.1813	0	15577	46.5752	0	12745	38.1076	0	11749	35.1295	0	24297	72.648	3.602e-16	20775	62.1172	0	56187	167.999	0				3370	10.0763	4.023e-16				12446	37.2135	0				24736	73.9606
7332	21.9227	0	30787	92.0531	0	29764	88.9944	0	21507	64.3059	0	33250	99.4175	0	15599	46.641	0	12808	38.2959	0	11753	35.1415	0	24364	72.8484	0	20874	62.4133	0	56203	168.047	0				3373	10.0853	0				12478	37.3092	0				24740	73.9726
7370	22.0363	0	30791	92.0651	0	29863	89.2904	0	21926	65.5587	0	33254	99.4295	0	15650	46.7935	0	12823	38.3408	0	11779	35.2192	0	24379	72.8932	6.181e-16	20917	62.5418	0	56327	168.418	0				3377	10.0972	1.4e-15				12487	37.3361	0				24743	73.9816
7385	22.0812	0	30798	92.086	0	29872	89.3173	0	21964	65.6724	0	33258	99.4414	0	15664	46.8354	0	12826	38.3497	0	11791	35.2551	4.676e-16	24505	73.2699	0	20943	62.6196	0	56370	168.546	1.492e-15				3378	10.1002	0				12501	37.378	0				24757	74.0234
7387	22.0871	0	30811	92.1249	0	29875	89.3263	0	21998	65.774	0	33301	99.57	7.612e-16	15673	46.8623	0	12861	38.4544	0	11796	35.27	0	24557	73.4254	8.936e-16	21016	62.8378	0	56411	168.669	0				3390	10.1361	0				12535	37.4796	0				24760	74.0324
7406	22.1439	0	30894	92.3731	0	30014	89.7419	0	22054	65.9415	0	33303	99.576	0	15900	47.541	0	12877	38.5022	0	11825	35.3567	0	24578	73.4882	0	21078	63.0232	0	56634	169.336	0				3394	10.1481	6.334e-16				12568	37.5783	0				24762	74.0384
7418	22.1798	0	30901	92.394	0	30020	89.7598	0	22063	65.9684	0	33348	99.7105	3.562e-15	15911	47.5739	0	12878	38.5052	0	11834	35.3837	0	24650	73.7035	6.191e-16	21092	63.0651	0	56679	169.47	0				3400	10.166	1.054e-15				12645	37.8086	0				24765	74.0473
7441	22.2486	0	30925	92.4657	0	30077	89.9302	0	22100	66.079	0	33403	99.875	0	15912	47.5769	0	12933	38.6697	0	11920	35.6408	0	24716	73.9008	0	21155	63.2535	0	56774	169.754	0				3402	10.172	0				12695	37.9581	0				24777	74.0832
7474	22.3473	0	30927	92.4717	0	30104	90.011	0	22112	66.1149	0	33428	99.9497	1.052e-15	15932	47.6367	0	12958	38.7444	0	11947	35.7215	0	24903	74.46	0	21208	63.4119	0	56809	169.859	0				3407	10.1869	0				12704	37.985	0				24796	74.14
7494	22.4071	0	30938	92.5046	0	30223	90.3668	0	22119	66.1358	0	33452	100.022	0	16101	48.142	0	12970	38.7803	0	11986	35.8381	0	25097	75.04	4.456e-16	21255	63.5525	0	56890	170.101	0				3409	10.1929	6.512e-16				12741	38.0956	0				24798	74.146
7521	22.4878	0	30947	92.5315	0	30290	90.5671	0	22131	66.1717	0	33554	100.326	0	16139	48.2556	0	12973	38.7893	0	11990	35.8501	0	25125	75.1238	3.887e-16	21258	63.5614	6.31e-16	57024	170.502	0				3425	10.2408	0				12797	38.263	1.124e-15				24809	74.1789
7527	22.5057	0	30954	92.5525	0	30556	91.3624	0	22338	66.7906	0	33575	100.389	6.907e-16	16166	48.3363	0	13031	38.9627	0	11995	35.8651	0	25165	75.2434	0	21334	63.7887	0	57071	170.642	0				3447	10.3065	0				12842	38.3976	0				24816	74.1998
7536	22.5326	0	30972	92.6063	0	30802	92.098	0	22354	66.8385	0	33666	100.661	0	16197	48.429	0	13044	39.0016	0	12036	35.9876	0	25201	75.351	0	21345	63.8216	0	57387	171.587	0				3449	10.3125	2.408e-15				12851	38.4245	0				24821	74.2148
7539	22.5416	0	31000	92.69	0	30813	92.1309	0	22359	66.8534	0	33699	100.76	7.573e-16	16199	48.435	0	13056	39.0374	0	12171	36.3913	0	25233	75.4467	0	21489	64.2521	0	57389	171.593	6.288e-16				3477	10.3962	0				12984	38.8222	4.154e-16				24826	74.2297
7564	22.6164	0	31018	92.7438	0	31042	92.8156	0	22396	66.964	0	33703	100.772	0	16231	48.5307	0	13062	39.0554	0	12178	36.4122	0	25324	75.7188	0	21506	64.3029	0	57473	171.844	0				3479	10.4022	0				13002	38.876	0				24835	74.2567
7577	22.6552	0	31020	92.7498	0	31054	92.8515	0	22534	67.3767	0	33825	101.137	0	16373	48.9553	0	13077	39.1002	0	12183	36.4272	0	25406	75.9639	0	21590	64.5541	0	57565	172.119	0				3480	10.4052	0				13025	38.9447	0				24844	74.2836
7592	22.7001	0	31049	92.8365	0	31062	92.8754	0	22615	67.6188	0	34137	102.07	0	16381	48.9792	0	13127	39.2497	0	12212	36.5139	8.397e-16	25551	76.3975	0	21642	64.7096	0	57636	172.332	0				3482	10.4112	0				13028	38.9537	0				24853	74.3105
7600	22.724	0	31149	93.1355	0	31286	93.5451	0	22622	67.6398	0	34254	102.419	0	16438	49.1496	0	13175	39.3933	0	12220	36.5378	0	25572	76.4603	0	21745	65.0175	0	57654	172.386	0				3483	10.4142	0				13046	39.0075	0				24855	74.3165
7610	22.7539	0	31164	93.1804	0	31416	93.9338	0	22635	67.6787	0	34538	103.269	0	16539	49.4516	0	13187	39.4291	0	12234	36.5797	0	25729	76.9297	1.186e-15	21763	65.0714	0	57716	172.571	0				3485	10.4201	0				13083	39.1182	0				24868	74.3553
7626	22.8017	0	31285	93.5422	0	31711	94.8159	0	22656	67.7414	0	34592	103.43	0	16581	49.5772	0	13214	39.5099	0	12282	36.7232	0	25750	76.9925	0	21777	65.1132	0	57806	172.84	0				3489	10.4321	0				13112	39.2049	0				24878	74.3852
7661	22.9064	0	31332	93.6827	0	31713	94.8219	0	22734	67.9747	0	34650	103.603	0	16618	49.6878	0	13248	39.6115	0	12318	36.8308	0	25758	77.0164	0	21801	65.185	4.743e-16	57930	173.211	0				3496	10.453	0				13114	39.2109	0				24884	74.4032
7717	23.0738	0	31653	94.6425	0	31791	95.0551	0	22747	68.0135	0	34682	103.699	0	16648	49.7775	0	13251	39.6205	0	12323	36.8458	0	25912	77.4769	0	21903	65.49	0	58347	174.458	0				3503	10.474	0				13146	39.3065	0				24929	74.5377
7753	23.1815	0	31836	95.1896	0	31879	95.3182	0	22846	68.3095	0	35060	104.829	0	16659	49.8104	0	13253	39.6265	0	12368	36.9803	0	25996	77.728	0	22025	65.8547	0	58480	174.855	0				3514	10.5069	1.091e-15				13184	39.4202	0				24930	74.5407
7762	23.2084	0	31898	95.375	0	31883	95.3302	0	22958	68.6444	0	35082	104.895	0	16687	49.8941	0	13256	39.6354	0	12393	37.0551	0	26004	77.752	0	22100	66.079	0	58513	174.954	0				3531	10.5577	1.019e-15				13261	39.6504	0				24938	74.5646
7764	23.2144	0	31907	95.4019	0	31959	95.5574	0	23067	68.9703	0	35107	104.97	0	16732	50.0287	0	13270	39.6773	0	12496	37.363	0	26025	77.8148	0	22102	66.085	3.935e-16	58677	175.444	0				3549	10.6115	5.447e-15				13285	39.7221	0				24945	74.5855
7788	23.2861	0	31933	95.4797	0	32132	96.0747	0	23079	69.0062	0	35182	105.194	0	16757	50.1034	0	13281	39.7102	5.714e-16	12512	37.4109	0	26058	77.9134	0	22159	66.2554	0	58689	175.48	0				3585	10.7192	1.472e-15				13290	39.7371	0				24950	74.6005
7797	23.313	0	32076	95.9072	0	32456	97.0434	0	23106	69.0869	0	35324	105.619	0	16883	50.4802	0	13284	39.7192	0	12539	37.4916	0	26255	78.5024	0	22177	66.3092	1.317e-15	59037	176.521	0				3595	10.7491	0				13293	39.7461	0				24962	74.6364
7814	23.3639	0	32182	96.2242	0	32538	97.2886	0	23177	69.2992	0	35333	105.646	0	16899	50.528	0	13297	39.758	0	12581	37.6172	0	26258	78.5114	6.408e-16	22231	66.4707	0	59077	176.64	5.033e-16				3602	10.77	0				13342	39.8926	0				25017	74.8008
7826	23.3997	0	32211	96.3109	0	32717	97.8238	0	23223	69.4368	0	35336	105.655	0	16921	50.5938	0	13310	39.7969	0	12623	37.7428	0	26336	78.7446	0	22254	66.5395	0	59099	176.706	0				3609	10.7909	0				13411	40.0989	0				25101	75.052
7878	23.5552	0	32282	96.5232	0	32808	98.0959	0	23320	69.7268	0	35591	106.417	1.494e-15	16938	50.6446	0	13326	39.8447	0	12665	37.8683	0	26351	78.7895	0	22277	66.6082	0	59132	176.805	7.511e-15				3628	10.8477	0				13467	40.2663	0				25131	75.1417
7887	23.5821	0	32302	96.583	0	33070	98.8793	0	23485	70.2202	0	35630	106.534	0	16960	50.7104	0	13355	39.9314	1.315e-15	12701	37.976	0	26413	78.9749	0	22331	66.7697	0	59211	177.041	0				3630	10.8537	0				13473	40.2843	4.302e-15				25154	75.2105
7930	23.7107	0	32307	96.5979	0	33109	98.9959	0	23493	70.2441	0	35747	106.883	1.339e-15	16998	50.824	0	13367	39.9673	0	12711	38.0059	0	26500	79.235	2.944e-15	22406	66.9939	0	59356	177.474	0				3632	10.8597	0				13489	40.3321	0				25160	75.2284
7933	23.7197	0	32387	96.8371	0	33118	99.0228	0	23574	70.4863	0	35803	107.051	0	17091	51.1021	0	13374	39.9883	0	12743	38.1016	0	26503	79.244	8.164e-16	22440	67.0956	0	59516	177.953	0				3642	10.8896	0				13624	40.7358	0				25166	75.2463
7957	23.7914	0	32423	96.9448	0	33138	99.0826	0	23608	70.5879	0	35816	107.09	0	17211	51.4609	0	13469	40.2723	0	12790	38.2421	0	26517	79.2858	0	22453	67.1345	0	59696	178.491	0				3668	10.9673	1.662e-15				13656	40.8314	0				25195	75.3331
7959	23.7974	0	32515	97.2199	0	33165	99.1633	0	23679	70.8002	0	35858	107.215	0	17222	51.4938	0	13501	40.368	0	12858	38.4454	6.561e-16	26593	79.5131	0	22649	67.7205	0	60024	179.472	0				3676	10.9912	7.154e-16				13691	40.9361	0				25239	75.4646
7968	23.8243	0	32567	97.3753	0	33383	99.8152	0	23781	71.1052	0	35936	107.449	7.781e-15	17308	51.7509	0	13526	40.4427	0	12863	38.4604	0	26716	79.8808	0	22695	67.8581	4.059e-16	60134	179.801	0				3679	11.0002	9.26e-16				13695	40.9481	0				25255	75.5125
7996	23.908	0	32578	97.4082	0	33501	100.168	0	23928	71.5447	0	36057	107.81	0	17317	51.7778	0	13543	40.4936	0	12882	38.5172	0	26771	80.0453	0	22742	67.9986	0							3684	11.0152	0				13725	41.0378	0				25261	75.5304
7998	23.914	0	32645	97.6086	0	33518	100.219	0	23983	71.7092	0	36305	108.552	0	17357	51.8974	0	13584	40.6162	0	12945	38.7056	0	26825	80.2067	0	22873	68.3903	0							3694	11.0451	3.478e-15				13772	41.1783	9.616e-16				25297	75.638
8000	23.92	0	32647	97.6145	0	33529	100.252	0	24150	72.2085	0	36379	108.773	0	17448	52.1695	0	13597	40.655	0	12965	38.7653	0	26845	80.2665	0	23012	68.8059	0							3695	11.048	0				13774	41.1843	0				25299	75.644
8005	23.935	0	32668	97.6773	0	33616	100.512	0	24272	72.5733	0	36387	108.797	0	17503	52.334	0	13647	40.8045	0	13077	39.1002	0	27044	80.8616	0	23090	69.0391	0							3707	11.0839	0				13788	41.2261	0				25359	75.8234
8022	23.9858	0	32732	97.8687	0	33619	100.521	0	24301	72.66	0	36395	108.821	0	17543	52.4536	0	13673	40.8823	0	13092	39.1451	0	27121	81.0918	0	23143	69.1976	0							3725	11.1378	1.55e-15				13796	41.25	0				25404	75.958
8055	24.0845	0	32830	98.1617	0	33670	100.673	0	24407	72.9769	0	36446	108.974	6.377e-15	17572	52.5403	0	13727	41.0437	0	13145	39.3036	0	27169	81.2353	4.595e-16	23156	69.2364	0							3732	11.1587	7.686e-16				13880	41.5012	0				25414	75.9879
8073	24.1383	0	32851	98.2245	0	33742	100.889	0	24491	73.2281	0	36465	109.03	0	17589	52.5911	0	13735	41.0677	0	13218	39.5218	7.176e-16	27428	82.0097	0	23357	69.8374	0							3738	11.1766	0				13884	41.5132	0				25415	75.9908
8095	24.204	0	32916	98.4188	0	33754	100.924	0	24536	73.3626	0	36471	109.048	0	17620	52.6838	0	13800	41.262	0	13221	39.5308	4.301e-16	27610	82.5539	7.847e-15	23381	69.9092	0							3752	11.2185	0				13994	41.8421	0				25418	75.9998
8113	24.2579	0	32933	98.4697	0	33798	101.056	0	24620	73.6138	0	36867	110.232	1.101e-15	17712	52.9589	0	13810	41.2919	0	13245	39.6026	0	27677	82.7542	3.626e-16	23486	70.2231	0							3759	11.2394	0				13997	41.851	0				25460	76.1254
8122	24.2848	0	32943	98.4996	0	33819	101.119	0	24708	73.8769	0	37041	110.753	0	17726	53.0007	0	13860	41.4414	0	13284	39.7192	0	27699	82.82	0	23522	70.3308	0							3779	11.2992	1.744e-15				14034	41.9617	0				25469	76.1523
8152	24.3745	0	33217	99.3188	0	33890	101.331	0	24785	74.1072	0	37060	110.809	2.155e-15	17793	53.2011	0	13909	41.5879	0	13312	39.8029	0	27702	82.829	0	23683	70.8122	0							3783	11.3112	2.316e-15				14050	42.0095	0				25475	76.1702
8153	24.3775	0	33220	99.3278	0	33935	101.466	0	24805	74.1669	0	37114	110.971	0	17920	53.5808	0	14005	41.8749	0	13345	39.9016	0	27760	83.0024	9.835e-15	23719	70.9198	0							3785	11.3171	4.04e-16				14058	42.0334	0				25489	76.2121
8205	24.5329	0	33534	100.267	0	33962	101.546	0	24818	74.2058	0	37232	111.324	0	17989	53.7871	0	14151	42.3115	0	13346	39.9045	0	27805	83.1369	4.013e-16	23869	71.3683	0							3796	11.35	4.595e-16				14124	42.2308	0				25494	76.2271
8217	24.5688	0	33571	100.377	0	33973	101.579	0	24827	74.2327	0	37344	111.659	0	18068	54.0233	0	14166	42.3563	6.095e-16	13363	39.9554	0	27859	83.2984	0	23897	71.452	0							3799	11.359	0				14135	42.2636	0				25574	76.4663
8219	24.5748	0	33899	101.358	0	33985	101.615	0	24859	74.3284	0	37371	111.739	0	18075	54.0442	0	14214	42.4999	0	13481	40.3082	0	27882	83.3672	0	23901	71.464	0							3802	11.368	1.027e-15				14205	42.4729	0				25596	76.532
8250	24.6675	0	33943	101.49	0	34157	102.129	0	24871	74.3643	0	37381	111.769	0	18126	54.1967	0	14233	42.5567	0	13509	40.3919	0	27964	83.6124	5.607e-16	23905	71.4759	0							3814	11.4039	1.213e-15				14207	42.4789	0				25673	76.7623
8255	24.6824	0	34066	101.857	0	34537	103.266	0	24957	74.6214	0	37546	112.263	0	18232	54.5137	0	14281	42.7002	0	13517	40.4158	0	28073	83.9383	0	23912	71.4969	0							3817	11.4128	0				14218	42.5118	0				25684	76.7952
8258	24.6914	0	34141	102.082	0	34598	103.448	0	24967	74.6513	0	37636	112.532	0	18292	54.6931	0	14284	42.7092	0	13535	40.4697	0	28080	83.9592	0	23974	71.6823	0							3835	11.4666	0				14261	42.6404	0				25711	76.8759
8263	24.7064	0	34282	102.503	0	34698	103.747	0	25032	74.8457	0	37671	112.636	0	18418	55.0698	0	14322	42.8228	0	13561	40.5474	0	28088	83.9831	0	24002	71.766	0							3848	11.5055	0				14267	42.6583	0				25979	77.6772
8269	24.7243	0	34315	102.602	0	34730	103.843	0	25065	74.9444	0	37699	112.72	0	18426	55.0937	0	14349	42.9035	0	13585	40.6191	0	28147	84.1595	2.687e-15	24016	71.8078	0							3856	11.5294	8.204e-16				14280	42.6972	0				26152	78.1945
8288	24.7811	0	34445	102.99	0	34805	104.067	0	25085	75.0041	0	37710	112.753	0	18464	55.2074	0	14379	42.9932	0	13601	40.667	0	28312	84.6529	5.995e-16	24056	71.9274	0							3870	11.5713	0				14329	42.8437	0				26178	78.2722
8297	24.808	0	34477	103.086	0	34908	104.375	0	25096	75.037	0	37741	112.846	1.059e-15	18519	55.3718	0	14381	42.9992	0	13616	40.7118	0	28458	85.0894	7.686e-16	24062	71.9454	0							3886	11.6191	3.134e-15				14336	42.8646	0				26201	78.341
8327	24.8977	0	34554	103.317	0	34990	104.62	0	25101	75.052	0	37798	113.016	0	18642	55.7396	0	14574	43.5763	0	13643	40.7926	0	28577	85.4452	0	24181	72.3012	0							3893	11.6401	0				14355	42.9215	0				26205	78.353
8330	24.9067	0	34562	103.34	0	35297	105.538	0	25114	75.0909	0	38056	113.787	1.786e-15	18673	55.8323	0	14580	43.5942	0	13671	40.8763	0	28819	86.1688	1.293e-15	24281	72.6002	6.507e-16							3898	11.655	4.884e-16				14390	43.0261	0				26215	78.3829
8357	24.9874	0	34782	103.998	0	35450	105.996	0	25185	75.3032	0	38210	114.248	0	18736	56.0206	0	14582	43.6002	0	13680	40.9032	0	28841	86.2346	0	24352	72.8125	0							3907	11.6819	0				14394	43.0381	0				26217	78.3888
8368	25.0203	0	34898	104.345	0	35504	106.157	0	25202	75.354	0	38264	114.409	0	18783	56.1612	0	14600	43.654	0	13801	41.265	0	28874	86.3333	5.551e-16	24363	72.8454	0							3910	11.6909	0				14398	43.05	0				26256	78.5054
8378	25.0502	0	34916	104.399	0	35791	107.015	0	25245	75.4826	0	38391	114.789	0	18788	56.1761	0	14634	43.7557	0	13839	41.3786	0	28959	86.5874	0	24722	73.9188	0							3911	11.6939	2.098e-15				14414	43.0979	0				26294	78.6191
8393	25.0951	0	35034	104.752	0	36053	107.799	0	25346	75.7845	0	38420	114.876	0	18800	56.212	0	14636	43.7616	0	13845	41.3965	0	28999	86.707	0	24789	74.1191	0							3918	11.7148	1.183e-15				14445	43.1906	0				26297	78.628
8450	25.2655	0	35112	104.985	0	36072	107.855	0	25398	75.94	0	38626	115.492	0	18814	56.2539	0	14638	43.7676	0	13879	41.4982	3.379e-15	29028	86.7937	0	24826	74.2297	6.08e-16							3922	11.7268	0				14454	43.2175	0				26312	78.6729
8464	25.3074	0	35139	105.066	0	36118	107.993	0	25408	75.9699	0	38775	115.937	7.196e-16	18847	56.3525	0	14644	43.7856	0	13965	41.7553	0	29069	86.9163	0	24833	74.2507	0							3923	11.7298	5.839e-15				14491	43.3281	0				26375	78.8612
8469	25.3223	0	35165	105.143	0	36122	108.005	0	25549	76.3915	0	38929	116.398	0	18849	56.3585	0	14676	43.8812	0	13974	41.7823	3.863e-16	29084	86.9612	0	24915	74.4959	0							3938	11.7746	0				14623	43.7228	0				26385	78.8911
8489	25.3821	0	35315	105.592	0	36165	108.133	0	25559	76.4214	0	38930	116.401	6.115e-15	18882	56.4572	0	14679	43.8902	0	13976	41.7882	2.228e-15	29171	87.2213	0	24919	74.5078	0							3940	11.7806	1.032e-15				14636	43.7616	0				26410	78.9659
8497	25.406	0	35461	106.028	0	36257	108.408	0	25611	76.5769	0	39031	116.703	0	18907	56.5319	0	14717	44.0038	0	14024	41.9318	0	29284	87.5592	0	24980	74.6902	4.617e-16							3943	11.7896	0				14639	43.7706	6.606e-16				26492	79.2111
8502	25.421	0	35482	106.091	0	36364	108.728	0	25639	76.6606	0	39047	116.751	0	18964	56.7024	0	14817	44.3028	0	14076	42.0872	0	29288	87.5711	0	25013	74.7889	0							3947	11.8015	0				14664	43.8454	0				26496	79.223
8520	25.4748	0	35484	106.097	0	36423	108.905	0	25722	76.9088	0	39091	116.882	0	19014	56.8519	0	14836	44.3596	0	14095	42.1441	0	29330	87.6967	0	25057	74.9204	0							3951	11.8135	0				14683	43.9022	0				26507	79.2559
8524	25.4868	0	35516	106.193	0	36472	109.051	0	25725	76.9177	0	39431	117.899	0	19157	57.2794	0	14871	44.4643	0	14128	42.2427	0	29379	87.8432	0	25086	75.0071	0							3981	11.9032	4.063e-16				14697	43.944	0				26511	79.2679
8525	25.4898	0	35541	106.268	0	36608	109.458	0	25741	76.9656	0	39675	118.628	1.136e-15	19168	57.3123	0	14901	44.554	0	14191	42.4311	0	29382	87.8522	0	25116	75.0968	0							3982	11.9062	0				14709	43.9799	0				26539	79.3516
8533	25.5137	0	35568	106.348	0	36617	109.485	0	25752	76.9985	0	39676	118.631	0	19250	57.5575	0	15043	44.9786	0	14196	42.446	0	29414	87.9479	3.956e-16	25168	75.2523	9.238e-16							3994	11.9421	0				14725	44.0277	0				26545	79.3696
8540	25.5346	0	35574	106.366	0	36746	109.871	0	25769	77.0493	0	39749	118.85	0	19337	57.8176	0	15104	45.161	0	14253	42.6165	4.777e-16	29415	87.9509	0	25171	75.2613	0							4007	11.9809	0				14732	44.0487	4.003e-16				26574	79.4563
8552	25.5705	0	35636	106.552	0	36759	109.909	0	25813	77.1809	0	40013	119.639	0	19438	58.1196	0	15114	45.1909	0	14370	42.9663	1.677e-15	29430	87.9957	0	25216	75.3958	0							4014	12.0019	2.506e-15				14781	44.1952	0				26588	79.4981
8554	25.5765	0	35653	106.603	0	36773	109.951	0	25882	77.3872	0	40115	119.944	0	19471	58.2183	0	15169	45.3553	0	14390	43.0261	0	29434	88.0077	0	25306	75.6649	0							4019	12.0168	0				14800	44.252	0				26607	79.5549
8562	25.6004	0	35667	106.644	0	36811	110.065	0	25940	77.5606	0	40483	121.044	0	19482	58.2512	0	15220	45.5078	0	14395	43.041	0	29451	88.0585	0	25308	75.6709	0							4027	12.0407	0				14814	44.2939	0				26608	79.5579
8574	25.6363	0	35735	106.848	0	37103	110.938	0	25957	77.6114	0	40579	121.331	0	19524	58.3768	0	15246	45.5855	0	14422	43.1218	0	29459	88.0824	0	25338	75.7606	0							4038	12.0736	2.065e-15				14819	44.3088	0				26627	79.6147
8600	25.714	0	35748	106.886	0	37128	111.013	0	25990	77.7101	0	40625	121.469	0	19529	58.3917	0	15285	45.7022	0	14439	43.1726	0	29470	88.1153	0	25354	75.8085	0							4041	12.0826	0				14823	44.3208	0				26649	79.6805
8601	25.717	0	35984	107.592	0	37192	111.204	0	26046	77.8775	0	40663	121.582	0	19544	58.4366	0	15370	45.9563	0	14446	43.1935	1.01e-15	29507	88.2259	0	25358	75.8204	0							4047	12.1005	4.277e-16				14842	44.3776	0				26672	79.7493
8613	25.7529	0	36086	107.897	0	37360	111.706	0	26114	78.0809	0	40676	121.621	0	19653	58.7625	0	15393	46.0251	0	14461	43.2384	0	29519	88.2618	0	25435	76.0507	4.055e-16							4051	12.1125	6.403e-16				14855	44.4164	0				26675	79.7583
8637	25.8246	0	36144	108.071	0	37415	111.871	0	26343	78.7656	0	40820	122.052	0	19656	58.7714	0	15415	46.0909	0	14519	43.4118	0	29597	88.495	0	25445	76.0806	0							4055	12.1244	0				14865	44.4464	0				26681	79.7762
8640	25.8336	0	36229	108.325	0	37492	112.101	0	26365	78.8314	0	41037	122.701	0	19665	58.7983	0	15428	46.1297	0	14576	43.5822	0	29660	88.6834	0	25452	76.1015	0							4056	12.1274	4.166e-16				14888	44.5151	0				26698	79.827
8644	25.8456	0	36265	108.432	0	37554	112.287	0	26478	79.1692	0	41049	122.737	6.507e-15	19760	59.0824	0	15463	46.2344	0	14626	43.7317	8.561e-16	29662	88.6894	0	25483	76.1942	0							4060	12.1394	3.519e-15				14904	44.563	0				26700	79.833
8647	25.8545	0	36271	108.45	0	37568	112.328	0	26519	79.2918	0	41117	122.94	0	19761	59.0854	0	15505	46.3599	0	14639	43.7706	0	29771	89.0153	1.504e-15	25592	76.5201	0							4064	12.1514	0				14920	44.6108	0				26718	79.8868
8651	25.8665	0	36277	108.468	0	37648	112.567	0	26528	79.3187	0	41247	123.329	0	19766	59.1003	0	15513	46.3839	0	14713	43.9919	2.192e-15	29854	89.2635	1.095e-15	25624	76.6158	0							4070	12.1693	5.263e-16				14922	44.6168	0				26720	79.8928
8652	25.8695	0	36308	108.561	0	37655	112.588	0	26585	79.4891	0	41268	123.391	0	19800	59.202	0	15542	46.4706	0	14716	44.0008	3.078e-15	29878	89.3352	0	25670	76.7533	0							4074	12.1813	0				14994	44.8321	0				26721	79.8958
8665	25.9083	0	36355	108.701	0	37744	112.855	0	26652	79.6895	0	41320	123.547	0	20030	59.8897	0	15547	46.4855	0	14723	44.0218	3.651e-15	30041	89.8226	0	25692	76.8191	0							4078	12.1932	0				15026	44.9277	0				26729	79.9197
8667	25.9143	0	36390	108.806	0	37748	112.867	0	26664	79.7254	0	41712	124.719	0	20035	59.9047	0	15550	46.4945	0	14781	44.1952	0	30112	90.0349	0	25730	76.9327	0							4086	12.2171	1.44e-15				15064	45.0414	0				26745	79.9676
8669	25.9203	0	36397	108.827	0	37968	113.524	0	26697	79.824	0	42017	125.631	0	20051	59.9525	0	15559	46.5214	0	14883	44.5002	6.715e-15	30135	90.1037	0	25761	77.0254	0							4102	12.265	8.438e-16				15094	45.1311	0				26752	79.9885
8688	25.9771	0	36475	109.06	0	38202	114.224	0	26772	80.0483	0	42299	126.474	0	20070	60.0093	0	15632	46.7397	0	14943	44.6796	0	30284	90.5492	0	25860	77.3214	0							4116	12.3068	0				15125	45.2238	0				26768	80.0363
8709	26.0399	0	36640	109.554	0	38261	114.4	0	26800	80.132	0	42370	126.686	0	20116	60.1468	0	15670	46.8533	0	14982	44.7962	1.342e-15	30354	90.7585	0	25867	77.3423	0							4117	12.3098	2.058e-15				15189	45.4151	0				26778	80.0662
8719	26.0698	0	36673	109.652	0	38274	114.439	0	26845	80.2665	0	42406	126.794	0	20200	60.398	0	15718	46.9968	0	15016	44.8978	0	30410	90.9259	9.833e-16	25903	77.45	0							4155	12.4235	4.462e-16				15237	45.5586	0				26788	80.0961
8725	26.0877	0	36693	109.712	0	38278	114.451	0	27017	80.7808	0	42436	126.884	0	20314	60.7389	0	15734	47.0447	0	15036	44.9576	0	30500	91.195	8.188e-16	25923	77.5098	0							4160	12.4384	0				15346	45.8845	0				26792	80.1081
8731	26.1057	0	36984	110.582	0	38293	114.496	0	27049	80.8765	0	42508	127.099	0	20362	60.8824	0	15821	47.3048	0	15045	44.9845	4.054e-15	30519	91.2518	4.649e-15	26028	77.8237	0							4168	12.4623	1.566e-15				15349	45.8935	0				26799	80.129
8743	26.1416	0	37002	110.636	0	38322	114.583	0	27060	80.9094	0	42677	127.604	0	20435	61.1007	0	15867	47.4423	0	15095	45.1341	0	30594	91.4761	0	26039	77.8566	0							4180	12.4982	0				15354	45.9085	0				26808	80.1559
8765	26.2074	0	37039	110.747	0	38361	114.699	0	27110	81.0589	0	42701	127.676	7.741e-16	20501	61.298	0	15902	47.547	0	15099	45.146	0	30614	91.5359	0	26153	78.1975	0							4185	12.5131	9.861e-16				15367	45.9473	0				26836	80.2396
8768	26.2163	0	37046	110.767	0	38438	114.93	0	27137	81.1396	0	42720	127.733	0	20561	61.4774	0	15936	47.6486	0	15122	45.2148	0	30623	91.5628	0	26220	78.3978	0							4193	12.5371	0				15433	46.1447	0				26838	80.2456
8771	26.2253	0	37077	110.86	0	38507	115.136	0	27172	81.2443	0	42744	127.805	0	20569	61.5013	0	15978	47.7742	0	15125	45.2238	0	30654	91.6555	0	26227	78.4187	0							4202	12.564	0				15441	46.1686	0				26881	80.3742
8781	26.2552	0	37266	111.425	0	38524	115.187	0	27238	81.4416	0	42784	127.924	4.306e-15	20607	61.6149	0	15982	47.7862	0	15129	45.2357	0	30719	91.8498	0	26229	78.4247	0							4210	12.5879	4.634e-14				15468	46.2493	0				26890	80.4011
8803	26.321	0	37382	111.772	0	38602	115.42	0	27294	81.6091	0	42800	127.972	0	20693	61.8721	0	16044	47.9716	0	15133	45.2477	0	30871	92.3043	0	26254	78.4995	0							4215	12.6029	0				15471	46.2583	0				26981	80.6732
8815	26.3569	0	37503	112.134	0	38837	116.123	0	27341	81.7496	0	42886	128.229	0	20711	61.9259	0	16060	48.0194	0	15140	45.2686	1.836e-15	30979	92.6272	2.736e-15	26279	78.5742	0							4221	12.6208	0				15487	46.3061	0				26986	80.6881
8819	26.3688	0	37904	113.333	0	38879	116.248	0	27356	81.7944	0	42903	128.28	0	20742	62.0186	0	16067	48.0403	0	15169	45.3553	0	30993	92.6691	0	26456	79.1034	0							4225	12.6327	0				15525	46.4198	0				27016	80.7778
8830	26.4017	0	37930	113.411	0	38927	116.392	0	27376	81.8542	0	42984	128.522	0	20756	62.0604	0	16080	48.0792	0	15237	45.5586	0	30999	92.687	0	26589	79.5011	0							4227	12.6387	0				15605	46.6589	0				27042	80.8556
8848	26.4555	0	37982	113.566	0	38964	116.502	0	27401	81.929	0	43015	128.615	0	20762	62.0784	0	16092	48.1151	0	15242	45.5736	0	31210	93.3179	0	26620	79.5938	0							4228	12.6417	9.312e-16				15617	46.6948	0				27055	80.8945
8854	26.4735	0	38026	113.698	0	38971	116.523	0	27470	82.1353	0	43029	128.657	0	20799	62.189	0	16094	48.1211	0	15283	45.6962	4.35e-16	31366	93.7843	0	26640	79.6536	0							4229	12.6447	0				15652	46.7995	0				27057	80.9004
8860	26.4914	0	38112	113.955	0	38991	116.583	0	27480	82.1652	0	43140	128.989	0	20863	62.3804	0	16128	48.2227	0	15302	45.753	0	31373	93.8053	0	26645	79.6685	0							4234	12.6597	0				15694	46.9251	0				27087	80.9901
8874	26.5333	0	38146	114.056	0	39002	116.616	0	27524	82.2968	0	43264	129.359	0	20908	62.5149	0	16167	48.3393	0	15324	45.8188	0	31380	93.8262	3.95e-16	26678	79.7672	0							4242	12.6836	0				15772	47.1583	0				27124	81.1008
8878	26.5452	0	38351	114.669	0	39051	116.763	0	27555	82.3894	0	43277	129.398	0	21007	62.8109	0	16169	48.3453	6.522e-16	15337	45.8576	0	31399	93.883	0	26719	79.8898	1.152e-15							4249	12.7045	0				15803	47.251	0				27157	81.1994
8880	26.5512	0	38707	115.734	0	39068	116.813	0	27571	82.4373	0	43372	129.682	0	21063	62.9784	0	16181	48.3812	0	15346	45.8845	5.238e-16	31491	94.1581	1.391e-15	26746	79.9705	0							4253	12.7165	0				15825	47.3167	0				27165	81.2233
8902	26.617	0	38804	116.024	0	39101	116.912	0	27573	82.4433	0	43790	130.932	0	21077	63.0202	0	16187	48.3991	0	15384	45.9982	3.812e-16	31536	94.2926	0	26824	80.2038	0							4260	12.7374	0				15834	47.3437	0				27182	81.2742
8933	26.7097	0	38843	116.141	0	39247	117.349	0	27604	82.536	0	44181	132.101	0	21112	63.1249	0	16195	48.4231	0	15421	46.1088	3.842e-16	31741	94.9056	0	26884	80.3832	0							4269	12.7643	0				15848	47.3855	0				27208	81.3519
8971	26.8233	0	39012	116.646	0	39835	119.107	0	27630	82.6137	0	44621	133.417	0	21183	63.3372	0	16202	48.444	9.243e-16	15455	46.2105	8.678e-15	31787	95.0431	0	26942	80.5566	9.214e-16							4289	12.8241	8.305e-15				15851	47.3945	0				27346	81.7645
8974	26.8323	0	39226	117.286	0	39882	119.247	0	27682	82.7692	0	44743	133.782	0	21197	63.379	0	16236	48.5456	0	15456	46.2134	0	31849	95.2285	5.571e-16	27019	80.7868	0							4295	12.8421	9.238e-16				15855	47.4064	0				27384	81.8782
8993	26.8891	0	40039	119.717	0	40009	119.627	0	27702	82.829	0	44748	133.797	1.172e-15	21215	63.4329	0	16238	48.5516	0	15478	46.2792	0	31896	95.369	0	27033	80.8287	0							4298	12.851	0				15863	47.4304	0				27470	82.1353
8998	26.904	0	40051	119.752	0	40034	119.702	0	27720	82.8828	0	44843	134.081	0	21227	63.4687	0	16240	48.5576	0	15501	46.348	0	31930	95.4707	0	27034	80.8317	0							4316	12.9048	1.286e-15				15956	47.7084	0				27476	82.1532
9000	26.91	0	40211	120.231	0	40098	119.893	0	27739	82.9396	0	45082	134.795	0	21272	63.6033	0	16263	48.6264	0	15605	46.6589	8.874e-16	31974	95.6023	0	27079	80.9662	0							4317	12.9078	0				15997	47.831	0				27507	82.2459
9055	27.0744	0	40297	120.488	0	40233	120.297	0	27748	82.9665	0	45256	135.315	0	21294	63.6691	0	16273	48.6563	0	15623	46.7128	0	32265	96.4724	2.097e-15	27143	81.1576	0							4324	12.9288	0				16015	47.8849	0				27570	82.4343
9090	27.1791	0	40415	120.841	0	40255	120.362	0	27857	83.2924	0	45551	136.197	0	21311	63.7199	0	16275	48.6623	0	15673	46.8623	0	32304	96.589	0	27147	81.1695	0							4337	12.9676	0				16036	47.9476	0				27618	82.5778
9136	27.3166	0	40853	122.15	0	40536	121.203	0	27873	83.3403	0	45604	136.356	0	21313	63.7259	0	16277	48.6682	0	15709	46.9699	8.46e-16	32357	96.7474	0	27150	81.1785	0							4350	13.0065	0				16081	48.0822	0				27824	83.1938
9150	27.3585	0	41151	123.041	0	40673	121.612	0	27928	83.5047	0	45609	136.371	0	21315	63.7319	0	16301	48.74	0	15742	47.0686	0	32425	96.9507	0	27151	81.1815	0							4356	13.0244	0				16092	48.1151	0				27919	83.4778
9182	27.4542	0	41253	123.347	0	40793	121.971	0	27940	83.5406	0	45799	136.939	2.219e-15	21319	63.7438	0	16387	48.9971	0	15750	47.0925	0	32434	96.9777	0	27185	81.2832	0							4365	13.0513	0				16127	48.2197	0				27939	83.5376
9207	27.5289	0	41292	123.463	0	40880	122.231	0	28185	84.2732	0	45819	136.999	0	21341	63.8096	0	16448	49.1795	0	15769	47.1493	0	32461	97.0584	0	27189	81.2951	0							4393	13.1351	0				16166	48.3363	0				28119	84.0758
9219	27.5648	0	41303	123.496	0	40892	122.267	0	28223	84.3868	0	46286	138.395	1.655e-15	21356	63.8544	0	16466	49.2333	0	15814	47.2839	0	32478	97.1092	0	27202	81.334	0							4398	13.15	0				16203	48.447	0				28296	84.605
9328	27.8907	0	41320	123.547	0	41001	122.593	0	28290	84.5871	0	46416	138.784	0	21378	63.9202	0	16471	49.2483	0	15898	47.535	0	32544	97.3066	0	27260	81.5074	0							4426	13.2337	0				16224	48.5098	0				28366	84.8143
9338	27.9206	0	41330	123.577	0	41015	122.635	0	28354	84.7785	0	47028	140.614	1.801e-14	21392	63.9621	0	16495	49.3201	0	15906	47.5589	0	32555	97.3394	0	27497	82.216	0							4429	13.2427	0				16268	48.6413	0				28489	85.1821
9344	27.9386	0	41357	123.657	0	41027	122.671	0	28671	85.7263	0	48302	144.423	0	21462	64.1714	0	16505	49.3499	0	15912	47.5769	0	32567	97.3753	0	27508	82.2489	0							4431	13.2487	0				16276	48.6652	0				28530	85.3047
9347	27.9475	0	41445	123.921	0	41413	123.825	0	28864	86.3034	0	48538	145.129	0	21494	64.2671	0	16521	49.3978	0	15919	47.5978	0	32590	97.4441	0	27518	82.2788	0							4433	13.2547	0				16314	48.7789	0				28576	85.4422
9359	27.9834	0	41591	124.357	0	41618	124.438	0	28897	86.402	0	48606	145.332	0	21495	64.27	0	16528	49.4187	0	15993	47.8191	0	32600	97.474	1.369e-15	27554	82.3865	0							4438	13.2696	4.016e-15				16318	48.7908	0				28594	85.4961
9466	28.3033	0	41661	124.566	0	41773	124.901	0	28923	86.4798	0	48682	145.559	0	21510	64.3149	0	16532	49.4307	0	15998	47.834	4.374e-16	32613	97.5129	0	27634	82.6257	0							4447	13.2965	6.87e-16				16455	49.2005	5.378e-16				28624	85.5858
9491	28.3781	0	41678	124.617	0	41907	125.302	0	28926	86.4887	0	48737	145.724	0	21585	64.5392	0	16554	49.4965	1.976e-15	16036	47.9476	4.384e-16	32640	97.5936	5.228e-16	27770	83.0323	0							4449	13.3025	0				16474	49.2573	0				29214	87.3499
9509	28.4319	0	41788	124.946	0	41946	125.418	0	29091	86.9821	0	48820	145.972	0	21617	64.6348	0	16621	49.6968	0	16043	47.9686	0	32680	97.7132	0	27879	83.3582	0							4452	13.3115	0				16495	49.3201	0				29257	87.4784
9517	28.4558	0	42342	126.603	0	41950	125.43	0	29143	87.1376	0	49050	146.66	0	21653	64.7425	0	16662	49.8194	8.685e-16	16095	48.1241	4.224e-15	32742	97.8986	6.859e-16	27887	83.3821	0							4472	13.3713	0				16555	49.4995	0				29383	87.8552
9523	28.4738	0	42392	126.752	0	41988	125.544	0	29220	87.3678	0	49061	146.692	0	21669	64.7903	0	16739	50.0496	0	16108	48.1629	0	32813	98.1109	1.359e-15	27926	83.4987	5.867e-16							4489	13.4221	1.156e-15				16585	49.5892	0				29409	87.9329
9551	28.5575	1.421e-15	42411	126.809	0	42227	126.259	0	29228	87.3917	0	49065	146.704	1.524e-15	21688	64.8471	0	16768	50.1363	0	16153	48.2975	0	32875	98.2963	0	27927	83.5017	0							4494	13.4371	0				16712	49.9689	0				29543	88.3336
9580	28.6442	0	42413	126.815	0	42258	126.351	0	29235	87.4126	0	49192	147.084	0	21835	65.2866	0	16792	50.2081	0	16213	48.4769	4.674e-16	32922	98.4368	0	27967	83.6213	0							4503	13.464	1.281e-15				16835	50.3366	0				29552	88.3605
9587	28.6651	0	42438	126.89	0	42524	127.147	0	29256	87.4754	0	49230	147.198	1.197e-15	21871	65.3943	0	16895	50.516	0	16269	48.6443	4.018e-16	32947	98.5115	0	27970	83.6303	0							4504	13.467	0				16844	50.3636	0				29776	89.0302
9588	28.6681	0	42446	126.913	0	42550	127.225	0	29278	87.5412	0	49254	147.269	0	21890	65.4511	0	16930	50.6207	0	16304	48.749	0	32987	98.6311	0	27976	83.6482	9.725e-16							4507	13.4759	0				16904	50.543	0				29819	89.1588
9613	28.7429	0	42451	126.928	0	42664	127.565	0	29335	87.7117	2.322e-15	49460	147.885	0	22103	66.088	0	17005	50.8449	0	16347	48.8775	4.442e-16	33034	98.7717	5.893e-15	27979	83.6572	0							4511	13.4879	0				16907	50.5519	0				30116	90.0468
9648	28.8475	0	42455	126.94	0	43069	128.776	0	29337	87.7176	0	50069	149.706	0	22202	66.384	0	17020	50.8898	0	16429	49.1227	0	33047	98.8105	0	28021	83.7828	0							4518	13.5088	0				16947	50.6715	0				30338	90.7106
9650	28.8535	0	42509	127.102	0	43104	128.881	0	29355	87.7715	0	50100	149.799	0	22345	66.8115	0	17026	50.9077	0	16442	49.1616	0	33067	98.8703	0	28207	84.3389	1.411e-15							4522	13.5208	0				16950	50.6805	0				30499	91.192
9706	29.0209	0	42513	127.114	0	43384	129.718	0	29539	88.3216	0	50248	150.242	0	22366	66.8743	0	17054	50.9915	0	16444	49.1676	0	33100	98.969	0	28251	84.4705	0							4526	13.5327	0				16963	50.7194	0				30501	91.198
9709	29.0299	0	42519	127.132	0	43590	130.334	0	29646	88.6415	0	50423	150.765	0	22371	66.8893	0	17077	51.0602	0	16449	49.1825	0	33140	99.0886	0	28270	84.5273	0							4527	13.5357	9.789e-16				16998	50.824	0				30582	91.4402
9721	29.0658	0	42648	127.517	0	43598	130.358	0	29656	88.6714	0	50436	150.804	1.047e-15	22407	66.9969	0	17079	51.0662	0	16454	49.1975	0	33144	99.1006	0	28308	84.6409	1.77e-15							4553	13.6135	4.123e-16				17012	50.8659	0				30603	91.503
9751	29.1555	0	42653	127.532	0	43644	130.496	0	29669	88.7103	0	50444	150.828	0	22423	67.0448	0	17113	51.1679	0	16459	49.2124	0	33183	99.2172	1.056e-15	28309	84.6439	0							4567	13.6553	2.554e-15				17020	50.8898	0				31106	93.0069
9779	29.2392	0	42661	127.556	0	43825	131.037	0	29718	88.8568	0	50451	150.849	0	22494	67.2571	0	17127	51.2097	0	16467	49.2363	0	33460	100.045	0	28449	85.0625	0							4570	13.6643	0				17044	50.9616	1.703e-15				31165	93.1834
9812	29.3379	0	42681	127.616	0	43981	131.503	0	29784	89.0542	0	50454	150.857	0	22498	67.269	0	17177	51.3592	0	16474	49.2573	0	33544	100.297	0	28474	85.1373	0							4595	13.7391	2.114e-15				17073	51.0483	0				31689	94.7501
9819	29.3588	0	42692	127.649	0	44021	131.623	0	29798	89.096	0	50485	150.95	0	22530	67.3647	0	17187	51.3891	0	16476	49.2632	0	33575	100.389	1.472e-15	28491	85.1881	8.169e-16							4601	13.757	6.951e-16				17175	51.3533	0				31721	94.8458
9831	29.3947	0	42771	127.885	0	44152	132.014	0	29847	89.2425	0	50494	150.977	0	22574	67.4963	0	17205	51.443	0	16479	49.2722	0	33659	100.64	0	28519	85.2718	0							4608	13.7779	0				17258	51.6014	0				31767	94.9833
9837	29.4126	0	42815	128.017	0	44358	132.63	0	30031	89.7927	0	50554	151.156	0	22709	67.8999	0	17233	51.5267	0	16494	49.3171	0	33674	100.685	7.326e-16	29092	86.9851	0							4627	13.8347	0				17265	51.6223	0				31931	95.4737
9844	29.4336	0	42835	128.077	0	44383	132.705	0	30124	90.0708	0	50616	151.342	0	22713	67.9119	0	17270	51.6373	0	16497	49.326	4.445e-16	33695	100.748	0	29203	87.317	0							4636	13.8616	0				17334	51.8287	0				32189	96.2451
9892	29.5771	0	42847	128.113	0	44397	132.747	0	30354	90.7585	0	50669	151.5	0	22714	67.9149	0	17286	51.6851	1.732e-15	16507	49.3559	0	33724	100.835	0	29208	87.3319	0							4642	13.8796	0				17350	51.8765	0				32295	96.562
9893	29.5801	0	42870	128.181	0	44423	132.825	0	30406	90.9139	0	50689	151.56	0	22760	68.0524	0	17288	51.6911	3.5e-15	16526	49.4127	0	33792	101.038	0	29226	87.3857	0							4684	14.0052	1.287e-14				17402	52.032	0				32464	97.0674
9915	29.6458	0	42968	128.474	0	44430	132.846	0	30465	91.0904	0	50713	151.632	0	22773	68.0913	0	17289	51.6941	0	16532	49.4307	0	33793	101.041	3.633e-16	29250	87.4575	0							4690	14.0231	0				17410	52.0559	0				32601	97.477
9937	29.7116	0	43101	128.872	0	44568	133.258	0	30883	92.3402	0	50846	152.03	0	22794	68.1541	0	17339	51.8436	0	16540	49.4546	0	33866	101.259	0	29327	87.6877	0							4707	14.0739	2.346e-15				17491	52.2981	0				32712	97.8089
9956	29.7684	0	43411	129.799	0	44665	133.548	0	30953	92.5495	0	50891	152.164	0	22798	68.166	0	17412	52.0619	0	16543	49.4636	0	33898	101.355	0	29350	87.7565	0							4729	14.1397	0				17521	52.3878	0				32867	98.2723
9967	29.8013	0	43414	129.808	0	44801	133.955	0	31200	93.288	0	51020	152.55	0	22802	68.178	0	17438	52.1396	0	16547	49.4755	1.458e-15	33899	101.358	0	29387	87.8671	0							4737	14.1636	6.292e-16				17585	52.5791	0				32885	98.3261
9968	29.8043	0	43568	130.268	0	44867	134.152	0	31236	93.3956	0	51088	152.753	0	22871	68.3843	0	17443	52.1546	0	16559	49.5114	0	33920	101.421	0	29393	87.8851	0							4750	14.2025	0				17596	52.612	0				32891	98.3441
9973	29.8193	0	43660	130.543	0	45215	135.193	0	31253	93.4465	0	51128	152.873	0	22917	68.5218	0	17452	52.1815	0	16561	49.5174	0	33986	101.618	8.971e-16	29436	88.0136	0							4756	14.2204	4.143e-15				17603	52.633	0				32914	98.4129
9980	29.8402	0	44030	131.65	0	45311	135.48	0	31404	93.898	0	51169	152.995	0	22944	68.6026	0	17503	52.334	0	16566	49.5323	0	34018	101.714	0	29438	88.0196	0							4764	14.2444	5.84e-15				17648	52.7675	5.237e-16				32929	98.4577
9995	29.885	0	44032	131.656	0	45313	135.486	0	31419	93.9428	0	51295	153.372	7.02e-16	22968	68.6743	0	17538	52.4386	0	16571	49.5473	0	34113	101.998	3.908e-16	29501	88.208	0							4773	14.2713	0				17690	52.8931	0				32936	98.4786
10009	29.9269	0	44139	131.976	0	45379	135.683	0	31481	94.1282	0	51324	153.459	0	22987	68.7311	0	17612	52.6599	0	16575	49.5592	0	34116	102.007	0	29561	88.3874	0							4798	14.346	0				17725	52.9978	0				32951	98.5235
10023	29.9688	0	44193	132.137	0	45385	135.701	0	31705	94.798	0	51337	153.498	1.048e-15	22994	68.7521	0	17635	52.7287	0	16577	49.5652	0	34140	102.079	0	29579	88.4412	0							4806	14.3699	0				17792	53.1981	0				32982	98.6162
10048	30.0435	0	44292	132.433	0	45407	135.767	0	31815	95.1269	0	51562	154.17	0	23012	68.8059	0	17691	52.8961	0	16589	49.6011	0	34242	102.384	0	29598	88.498	0							4815	14.3969	9.067e-16				17809	53.2489	1.008e-15				33126	99.0467
10060	30.0794	0	44306	132.475	0	45436	135.854	0	31879	95.3182	0	51687	154.544	0	23017	68.8208	0	17696	52.911	0	16590	49.6041	0	34386	102.814	0	29694	88.7851	0							4820	14.4118	7.498e-16				17815	53.2668	0				33305	99.582
10083	30.1482	0	44313	132.496	0	45477	135.976	0	31918	95.4348	0	51729	154.67	0	23020	68.8298	0	17704	52.935	0	16618	49.6878	0	34440	102.976	0	29733	88.9017	0							4821	14.4148	0				17825	53.2968	0				33474	100.087
10102	30.205	0	44430	132.846	0	45505	136.06	0	31959	95.5574	0	51876	155.109	0	23032	68.8657	0	17710	52.9529	0	16629	49.7207	0	34608	103.478	0	29778	89.0362	0							4823	14.4208	3.816e-15				17843	53.3506	0				33498	100.159
10122	30.2648	0	44449	132.903	0	45610	136.374	0	32037	95.7906	0	52017	155.531	0	23033	68.8687	0	17793	53.2011	0	16633	49.7327	0	34666	103.651	0	29784	89.0542	0							4829	14.4387	0				17877	53.4522	0				34157	102.129
10124	30.2708	0	44694	133.635	0	45627	136.425	0	32056	95.8474	0	52019	155.537	0	23045	68.9046	0	17797	53.213	0	16640	49.7536	0	34667	103.654	3.78e-16	29841	89.2246	0							4847	14.4925	4.963e-16				17940	53.6406	0				34739	103.87
10128	30.2827	0	44837	134.063	0	45649	136.49	0	32081	95.9222	0	52068	155.683	1.479e-15	23050	68.9195	0	17874	53.4433	0	16651	49.7865	0	34681	103.696	0	29948	89.5445	0							4852	14.5075	5.327e-16				18030	53.9097	0				35089	104.916
10212	30.5339	0	45007	134.571	0	45847	137.083	0	32155	96.1435	0	52158	155.952	3.068e-14	23109	69.0959	0	17883	53.4702	0	16653	49.7925	0	34733	103.852	0	29961	89.5834	0							4861	14.5344	3.995e-15				18118	54.1728	0				35177	105.179
10284	30.7492	0	45033	134.649	0	45862	137.127	0	32176	96.2062	0	52208	156.102	0	23141	69.1916	0	17885	53.4762	0	16664	49.8254	0	34770	103.962	0	29986	89.6581	0							4863	14.5404	0				18154	54.2805	0				35306	105.565
10292	30.7731	0	45127	134.93	0	45875	137.166	0	32233	96.3767	0	52276	156.305	0	23195	69.353	0	17899	53.518	0	16668	49.8373	0	34777	103.983	0	30005	89.715	0							4872	14.5673	3.89e-16				18159	54.2954	0				35588	106.408
10338	30.9106	0	45520	136.105	0	45910	137.271	0	32248	96.4215	0	52457	156.846	0	23250	69.5175	0	17948	53.6645	0	16677	49.8642	0	34867	104.252	0	30015	89.7448	0							4893	14.6301	0				18291	54.6901	0				35902	107.347
10379	31.0332	0	45619	136.401	0	45916	137.289	0	32301	96.58	0	52533	157.074	0	23306	69.6849	0	17958	53.6944	0	16686	49.8911	0	34932	104.447	9.485e-16	30017	89.7508	0							4902	14.657	0				18300	54.717	0				36119	107.996
10397	31.087	0	45674	136.565	0	45945	137.376	0	32306	96.5949	0	52571	157.187	0	23319	69.7238	0	17981	53.7632	0	16707	49.9539	0	34944	104.483	0	30038	89.8136	0							4908	14.6749	6.938e-16				18365	54.9113	0				36170	108.148
10413	31.1349	0	46649	139.481	0	46009	137.567	0	32319	96.6338	0	52653	157.433	0	23338	69.7806	0	17989	53.7871	0	16714	49.9749	4.627e-16	34966	104.548	3.834e-16	30040	89.8196	0							4921	14.7138	0				18372	54.9323	0				36289	108.504
10422	31.1618	0	47113	140.868	0	46035	137.645	0	32350	96.7265	0	52679	157.51	0	23371	69.8793	0	18000	53.82	0	16721	49.9958	0	34976	104.578	0	30068	89.9033	0							4927	14.7317	1.106e-15				18381	54.9592	0				36337	108.648
10453	31.2545	0	47125	140.904	0	46149	137.986	0	32380	96.8162	0	52904	158.183	0	23421	70.0288	0	18051	53.9725	0	16744	50.0646	0	34996	104.638	0	30086	89.9571	0							4935	14.7557	0				18390	54.9861	0				36902	110.337
10470	31.3053	0	47149	140.976	0	46192	138.114	0	32461	97.0584	0	53088	158.733	2.932e-14	23425	70.0408	0	18108	54.1429	0	16783	50.1812	0	35027	104.731	3.71e-16	30107	90.0199	0							4937	14.7616	0				18428	55.0997	0				36916	110.379
10518	31.4488	0	47182	141.074	0	46199	138.135	0	32591	97.4471	0	53361	159.549	0	23457	70.1364	9.974e-15	18120	54.1788	0	16833	50.3307	0	35050	104.799	4.914e-16	30150	90.1485	0							4950	14.8005	0				18457	55.1864	0				37487	112.086
10530	31.4847	0	47246	141.266	0	46231	138.231	0	32600	97.474	0	53387	159.627	0	23460	70.1454	0	18159	54.2954	0	16847	50.3725	0	35064	104.841	0	30194	90.2801	0							4952	14.8065	5.848e-16				18464	55.2074	0				37815	113.067
10552	31.5505	0	47296	141.415	0	46237	138.249	0	32616	97.5218	0	53569	160.171	0	23481	70.2082	0	18218	54.4718	0	16856	50.3994	0	35158	105.122	0	30205	90.313	0							4968	14.8543	0				18541	55.4376	0				38121	113.982
10562	31.5804	0	47396	141.714	0	46264	138.329	0	32644	97.6056	0	53764	160.754	8.212e-16	23535	70.3697	0	18243	54.5466	0	16879	50.4682	0	35219	105.305	1.782e-15	30283	90.5462	0							4978	14.8842	0				18656	55.7814	0				38535	115.22
10590	31.6641	0	47406	141.744	0	46271	138.35	0	32710	97.8029	0	53777	160.793	0	23547	70.4055	0	18254	54.5795	0	16909	50.5579	0	35331	105.64	3.554e-15	30339	90.7136	4.544e-16							4979	14.8872	5.66e-16				18686	55.8711	0				39021	116.673
10599	31.691	0	47509	142.052	0	46274	138.359	0	32744	97.9046	0	53929	161.248	0	23574	70.4863	0	18263	54.6064	0	17039	50.9466	8.33e-16	35359	105.723	0	30345	90.7315	0							4984	14.9022	6.221e-15				18766	56.1103	0				39364	117.698
10616	31.7418	0	47885	143.176	0	46294	138.419	0	32778	98.0062	0	53947	161.302	0	23631	70.6567	0	18273	54.6363	0	17092	51.1051	2.773e-15	35570	106.354	0	30379	90.8332	0							4998	14.944	6.215e-16				18777	56.1432	0				39645	118.539
10654	31.8555	0	48003	143.529	0	46316	138.485	0	32877	98.3022	0	53971	161.373	0	23633	70.6627	0	18301	54.72	0	17119	51.1858	0	35595	106.429	6.236e-16	30534	91.2967	0							5016	14.9978	0				18795	56.197	0				39971	119.513
10688	31.9571	0	48005	143.535	0	46333	138.536	0	32893	98.3501	0	53996	161.448	0	23730	70.9527	0	18349	54.8635	0	17155	51.2934	4.183e-16	35716	106.791	0	30555	91.3594	0							5023	15.0188	1.858e-15				18815	56.2569	0				40968	122.494
10750	32.1425	0	48021	143.583	0	46395	138.721	0	32922	98.4368	0	54081	161.702	0	23972	71.6763	0	18389	54.9831	0	17158	51.3024	0	35732	106.839	0	30577	91.4252	0							5025	15.0248	0				18831	56.3047	0				41370	123.696
10763	32.1814	0	48098	143.813	0	46430	138.826	0	32954	98.5325	0	54091	161.732	0	24045	71.8945	0	18462	55.2014	0	17261	51.6104	0	35875	107.266	0	30608	91.5179	0							5043	15.0786	4.005e-16				18871	56.4243	0				41489	124.052
10818	32.3458	0	48208	144.142	0	46505	139.05	0	33002	98.676	0	54095	161.744	0	24076	71.9872	0	18487	55.2761	0	17279	51.6642	0	35901	107.344	3.844e-16	30634	91.5957	0							5051	15.1025	0				18895	56.4961	0				42148	126.022
10833	32.3907	0	48353	144.576	0	46549	139.181	0	33132	99.0647	0	54304	162.369	0	24138	72.1726	0	18512	55.3509	0	17284	51.6792	0	35980	107.58	0	30654	91.6555	0							5058	15.1234	0				18921	56.5738	0				42404	126.788
10884	32.5432	0	48505	145.03	0	46614	139.376	0	33136	99.0766	0	54597	163.245	0	24310	72.6869	0	18562	55.5004	0	17310	51.7569	0	36053	107.799	5.311e-16	30744	91.9246	0							5127	15.3297	5.367e-15				18941	56.6336	5.312e-16				42537	127.186
10891	32.5641	0	48511	145.048	0	46715	139.678	0	33140	99.0886	0	54643	163.383	0	24339	72.7736	0	18599	55.611	0	17322	51.7928	5.871e-16	36118	107.993	0	30911	92.4239	0							5130	15.3387	0				18967	56.7113	0				42902	128.277
10922	32.6568	0	48524	145.087	0	46734	139.735	0	33149	99.1155	0	54679	163.49	5.875e-15	24452	73.1115	0	18689	55.8801	0	17339	51.8436	1.629e-15	36175	108.163	0	30915	92.4359	0							5134	15.3507	1.466e-15				18973	56.7293	0				43069	128.776
10961	32.7734	0	48560	145.194	0	46905	140.246	0	33183	99.2172	0	54680	163.493	0	24463	73.1444	0	18701	55.916	0	17343	51.8556	0	36220	108.298	0	30978	92.6242	0							5141	15.3716	0				18981	56.7532	0				43554	130.226
10973	32.8093	0	48587	145.275	0	47000	140.53	0	33195	99.2531	0	54761	163.735	1.682e-14	24601	73.557	0	18724	55.9848	0	17388	51.9901	1.657e-15	36231	108.331	5.782e-16	31104	93.001	0							5144	15.3806	0				19009	56.8369	0				43703	130.672
10978	32.8242	0	48622	145.38	0	47059	140.706	0	33200	99.268	0	54789	163.819	0	24603	73.563	0	18730	56.0027	0	17389	51.9931	0	36441	108.959	6.791e-16	31227	93.3687	0							5147	15.3895	0				19017	56.8608	0				44504	133.067
10982	32.8362	0	48632	145.41	0	47179	141.065	0	33220	99.3278	0	54801	163.855	0	24610	73.5839	0	18733	56.0117	0	17433	52.1247	0	36442	108.962	0	31393	93.8651	0							5153	15.4075	0				19039	56.9266	0				44559	133.231
10992	32.8661	0	48680	145.553	0	47185	141.083	0	33249	99.4145	0	54858	164.025	0	24624	73.6258	0	18739	56.0296	0	17496	52.313	0	36454	108.998	0	31403	93.895	0							5156	15.4164	5.478e-16				19044	56.9416	0				45421	135.809
11045	33.0245	0	48704	145.625	0	47215	141.173	0	33271	99.4803	0	54862	164.037	0	24685	73.8081	0	18743	56.0416	0	17499	52.322	0	36549	109.281	1.063e-15	31408	93.9099	0							5165	15.4434	0				19063	56.9984	0				45422	135.812
11068	33.0933	0	48713	145.652	0	47520	142.085	0	33324	99.6388	0	54864	164.043	0	24815	74.1968	0	18768	56.1163	0	17509	52.3519	0	36601	109.437	0	31453	94.0445	0							5192	15.5241	0				19093	57.0881	0				45890	137.211
11107	33.2099	0	48729	145.7	0	47600	142.324	0	33541	100.288	0	54927	164.232	0	24843	74.2806	0	18817	56.2628	0	17568	52.5283	0	36665	109.628	0	31469	94.0923	0							5206	15.5659	0				19148	57.2525	0				46262	138.323
11259	33.6644	0	48804	145.924	0	47610	142.354	0	33568	100.368	0	54938	164.265	0	24867	74.3523	0	18863	56.4004	4.117e-16	17580	52.5642	0	36681	109.676	0	31519	94.2418	7.339e-15							5208	15.5719	0				19164	57.3004	0				46463	138.924
11302	33.793	0	48843	146.041	0	47855	143.087	0	33665	100.658	0	54960	164.33	0	24897	74.442	0	18964	56.7024	1.257e-15	17585	52.5791	4.448e-16	36900	110.331	0	31572	94.4003	0							5215	15.5929	0				19188	57.3721	0				47015	140.575
11305	33.8019	0	48903	146.22	0	47949	143.368	0	33679	100.7	0	54985	164.405	0	24913	74.4899	0	18981	56.7532	0	17608	52.6479	0	36935	110.436	0	31658	94.6574	0							5220	15.6078	2.737e-15				19214	57.4499	0				47127	140.91
11355	33.9515	0	48939	146.328	0	47958	143.394	0	33687	100.724	0	55012	164.486	0	24936	74.5586	0	19005	56.825	0	17631	52.7167	0	36940	110.451	0	31687	94.7441	0							5221	15.6108	0				19238	57.5216	0				48013	143.559
11428	34.1697	0	49156	146.976	0	48164	144.01	0	33753	100.921	0	55065	164.644	0	24937	74.5616	0	19127	57.1897	0	17643	52.7526	0	37068	110.833	0	31699	94.78	0							5226	15.6257	2.11e-15				19319	57.7638	9.526e-16				48149	143.965
11453	34.2445	0	49159	146.985	0	48236	144.226	0	33854	101.224	0	55137	164.86	0	24952	74.6065	0	19156	57.2764	0	17680	52.8632	0	37323	111.596	0	31842	95.2076	4.941e-16							5231	15.6407	0				19380	57.9462	0				48317	144.468
11456	34.2534	0	49161	146.991	0	48268	144.321	0	33861	101.244	0	55144	164.881	0	24957	74.6214	0	19161	57.2914	0	17702	52.929	0	37367	111.727	0	31873	95.3003	0							5235	15.6526	0				19400	58.006	0				48816	145.96
11465	34.2803	0	49214	147.15	0	48528	145.099	0	33872	101.277	0	55304	165.359	0	24967	74.6513	0	19176	57.3362	0	17770	53.1323	0	37417	111.877	0	31878	95.3152	0							5246	15.6855	4.18e-16				19462	58.1914	0				49564	148.196
11470	34.2953	0	49231	147.201	0	48670	145.523	0	33890	101.331	0	55387	165.607	0	25024	74.8218	0	19184	57.3602	0	17811	53.2549	0	37484	112.077	0	31910	95.4109	0							5256	15.7154	4.123e-16				19511	58.3379	0				49815	148.947
11482	34.3312	0	49245	147.243	0	48743	145.742	0	33998	101.654	0	55470	165.855	0	25071	74.9623	0	19187	57.3691	0	17841	53.3446	0	37619	112.481	0	31991	95.6531	4.103e-16							5257	15.7184	0				19518	58.3588	0				49872	149.117
11511	34.4179	0	49247	147.249	0	48775	145.837	0	34025	101.735	0	55571	166.157	0	25094	75.0311	0	19189	57.3751	0	17878	53.4552	0	37776	112.95	2.167e-15	32026	95.7577	0							5260	15.7274	6.381e-15				19532	58.4007	0				50340	150.517
11525	34.4597	0	49300	147.407	0	48809	145.939	0	34063	101.848	0	55669	166.45	0	25096	75.037	0	19191	57.3811	0	17917	53.5718	0	37807	113.043	0	32124	96.0508	0							5265	15.7424	0				19559	58.4814	0				50424	150.768
11580	34.6242	0	49320	147.467	0	48827	145.993	0	34109	101.986	0	55764	166.734	0	25141	75.1716	0	19251	57.5605	0	17934	53.6227	0	38034	113.722	0	32222	96.3438	0							5283	15.7962	5.821e-16				19568	58.5083	0				50490	150.965
11642	34.8096	0	49358	147.58	0	48885	146.166	0	34227	102.339	0	55790	166.812	0	25162	75.2344	0	19258	57.5814	0	17968	53.7243	0	38092	113.895	0	32247	96.4185	0							5285	15.8022	0				19624	58.6758	0				50832	151.988
11679	34.9202	0	49483	147.954	0	48902	146.217	0	34231	102.351	0	56035	167.545	0	25188	75.3121	0	19269	57.6143	0	17975	53.7452	1.49e-15	38226	114.296	0	32272	96.4933	1.391e-15							5290	15.8171	0				19681	58.8462	0				52917	158.222
11705	34.998	0	49488	147.969	0	49017	146.561	0	34236	102.366	0	56096	167.727	0	25198	75.342	0	19285	57.6622	0	18026	53.8977	0	38347	114.657	0	32296	96.565	0							5307	15.8679	0				19695	58.888	0				53041	158.593
11733	35.0817	0	49498	147.999	0	49043	146.639	0	34243	102.387	0	56150	167.888	0	25229	75.4347	0	19306	57.7249	0	18032	53.9157	0	38418	114.87	6.148e-15	32343	96.7056	0							5311	15.8799	0				19730	58.9927	0				54522	163.021
11746	35.1205	0	49507	148.026	0	49074	146.731	0	34256	102.425	0	56152	167.894	1.027e-15	25257	75.5184	0	19308	57.7309	0	18038	53.9336	0	38547	115.255	1e-15	32361	96.7594	6.922e-16							5313	15.8859	0				19775	59.1273	0				54537	163.066
11754	35.1445	0	49513	148.044	0	49238	147.222	0	34279	102.494	0	56371	168.549	0	25260	75.5274	0	19335	57.8117	2.864e-15	18042	53.9456	2.331e-15	38584	115.366	0	32507	97.1959	0							5314	15.8889	4.301e-15				19811	59.2349	0				55035	164.555
11767	35.1833	0	49547	148.145	0	49295	147.392	0	34288	102.521	0	56447	168.776	0	25268	75.5513	0	19339	57.8236	0	18071	54.0323	0	38594	115.396	0	32525	97.2498	0							5320	15.9068	0				19825	59.2767	0				55501	165.948
11851	35.4345	0	49550	148.155	0	49383	147.655	0	34297	102.548	0	56544	169.067	0	25272	75.5633	0	19353	57.8655	0	18262	54.6034	5.614e-16	38617	115.465	0	32576	97.4022	0							5343	15.9756	0				19830	59.2917	0				55614	166.286
11852	35.4375	0	49564	148.196	0	49472	147.921	0	34302	102.563	0	56680	169.473	0	25280	75.5872	0	19404	58.018	0	18329	54.8037	0	38774	115.934	0	32654	97.6355	0							5350	15.9965	0				19900	59.501	0				55785	166.797
11858	35.4554	0	49592	148.28	0	49533	148.104	0	34315	102.602	0	56768	169.736	3.383e-15	25293	75.6261	0	19408	58.0299	0	18338	54.8306	0	38831	116.105	0	32666	97.6713	0							5355	16.0114	0				19911	59.5339	0				55881	167.084
11889	35.5481	0	49600	148.304	0	49561	148.187	0	34328	102.641	0	56814	169.874	0	25297	75.638	0	19454	58.1675	0	18354	54.8785	0	38895	116.296	0	32720	97.8328	0							5359	16.0234	1.59e-15				19975	59.7253	0				56463	168.824
11890	35.5511	0	49619	148.361	0	49573	148.223	3.285e-15	34337	102.668	0	56836	169.94	0	25404	75.958	0	19457	58.1764	0	18360	54.8964	0	39019	116.667	7.861e-16	32731	97.8657	0							5377	16.0772	0				19995	59.785	0				57118	170.783
11937	35.6916	0	49656	148.471	0	49603	148.313	0	34353	102.716	0	56841	169.955	0	25430	76.0357	0	19478	58.2392	0	18417	55.0668	4.443e-16	39065	116.804	0	32844	98.2036	0							5384	16.0982	6.756e-16				20014	59.8419	4.808e-16				57449	171.773
11980	35.8202	0	49667	148.504	0	49691	148.576	0	34381	102.799	0	56848	169.976	0	25471	76.1583	0	19487	58.2661	0	18439	55.1326	3.153e-15	39292	117.483	0	32866	98.2693	2.583e-15							5394	16.1281	6.126e-15				20020	59.8598	0				57690	172.493
11996	35.868	0	49677	148.534	0	49903	149.21	0	34389	102.823	0	56859	170.008	0	25477	76.1762	0	19491	58.2781	0	18535	55.4196	0	39350	117.656	0	32873	98.2903	0							5412	16.1819	0				20025	59.8747	0				57807	172.843
12004	35.892	0	49727	148.684	0	49925	149.276	0	34395	102.841	0	56865	170.026	0	25528	76.3287	0	19506	58.3229	0	18543	55.4436	0	39393	117.785	0	32891	98.3441	0							5422	16.2118	2.456e-15				20054	59.9615	0				58084	173.671
12062	36.0654	0	49816	148.95	0	49956	149.368	0	34416	102.904	0	56956	170.298	0	25591	76.5171	0	19510	58.3349	0	18548	55.4585	1.849e-15	39395	117.791	2.506e-15	32911	98.4039	7.029e-15							5426	16.2237	0				20056	59.9674	0				58133	173.818
12078	36.1132	0	49861	149.084	0	49981	149.443	0	34421	102.919	0	56961	170.313	0	25602	76.55	0	19521	58.3678	0	18610	55.6439	4.468e-15	39402	117.812	0	32912	98.4069	0							5441	16.2686	3.626e-15				20073	60.0183	0				58282	174.263
12126	36.2567	0	49884	149.153	0	50027	149.581	0	34431	102.949	0	56963	170.319	0	25674	76.7653	0	19578	58.5382	0	18650	55.7635	0	39456	117.973	0	32921	98.4338	0							5457	16.3164	4.879e-16				20085	60.0541	0				58545	175.05
12154	36.3405	0	49913	149.24	0	50044	149.632	0	34446	102.993	0	56984	170.382	0	25682	76.7892	0	19608	58.6279	0	18653	55.7725	6.556e-16	39463	117.994	0	32963	98.5594	0							5484	16.3972	0				20104	60.111	0				58781	175.755
12159	36.3554	0	50028	149.584	0	50056	149.667	0	34499	103.152	0	57074	170.651	0	25739	76.9596	0	19650	58.7535	0	18659	55.7904	0	39540	118.225	0	32983	98.6192	0							5486	16.4031	0				20114	60.1409	0				59788	178.766
12166	36.3763	0	50242	150.224	0	50126	149.877	0	34581	103.397	0	57098	170.723	0	25821	77.2048	0	19688	58.8671	7.565e-16	18782	56.1582	0	39541	118.228	4.865e-16	33005	98.685	0							5497	16.436	3.992e-15				20173	60.3173	0
12187	36.4391	0	50249	150.244	0	50176	150.026	0	34588	103.418	0	57102	170.735	0	25866	77.3393	0	19733	59.0017	0	18812	56.2479	0	39548	118.249	0	33025	98.7447	0							5499	16.442	7.526e-16				20299	60.694	0
12207	36.4989	0	50322	150.463	0	50311	150.43	0	34618	103.508	0	57129	170.816	0	25984	77.6922	0	19758	59.0764	0	18855	56.3764	0	39553	118.263	0	33057	98.8404	0							5501	16.448	0				20338	60.8106	0
12273	36.6963	0	50702	151.599	0	50516	151.043	0	34703	103.762	0	57142	170.855	0	25995	77.725	0	19763	59.0914	0	18928	56.5947	0	39555	118.269	0	33060	98.8494	0							5512	16.4809	6.527e-16				20351	60.8495	0
12277	36.7082	0	50752	151.749	0	50638	151.408	0	34813	104.091	0	57360	171.506	0	26393	78.9151	0	19786	59.1601	0	18957	56.6814	0	39579	118.341	0	33079	98.9062	0							5524	16.5168	0				20372	60.9123	0
12288	36.7411	0	51140	152.909	0	50743	151.722	0	34871	104.264	0	57847	172.963	0	26425	79.0108	0	19804	59.214	0	18976	56.7382	0	39711	118.736	0	33269	99.4743	0							5551	16.5975	0				20396	60.984	0
12312	36.8129	0	51147	152.929	0	50789	151.859	0	35390	105.816	0	58590	175.184	0	26484	79.1872	0	19901	59.504	0	19042	56.9356	0	39818	119.056	0	33284	99.5192	0							5566	16.6423	0				20421	61.0588	0
12319	36.8338	0	51229	153.175	0	50926	152.269	0	35394	105.828	0	58616	175.262	0	26491	79.2081	0	19918	59.5548	0	19067	57.0103	1.766e-15	39819	119.059	6.713e-15	33340	99.6866	0							5568	16.6483	0				20519	61.3518	0
12327	36.8577	0	51260	153.267	0	51048	152.633	0	35494	106.127	0	58633	175.313	0	26514	79.2769	0	19921	59.5638	0	19089	57.0761	0	39870	119.211	1.589e-15	33371	99.7793	0							5583	16.6932	2.006e-15				20543	61.4236	0
12332	36.8727	0	51320	153.447	0	51052	152.645	0	35555	106.309	0	58693	175.492	1.367e-15	26522	79.3008	0	19978	59.7342	0	19129	57.1957	0	39918	119.355	0	33381	99.8092	0							5587	16.7051	5.32e-16				20555	61.4595	0
12335	36.8817	0	51330	153.477	0	51415	153.731	0	35668	106.647	0	58704	175.525	0	26652	79.6895	0	19985	59.7552	0	19141	57.2316	8.069e-16	39949	119.448	0	33445	100.001	0							5594	16.7261	0				20556	61.4624	1.945e-15
12339	36.8936	0	51368	153.59	0	51454	153.847	0	35725	106.818	0	58716	175.561	0	26655	79.6984	0	20009	59.8269	0	19154	57.2705	1.352e-15	39957	119.471	1.63e-15	33475	100.09	0							5595	16.7291	0				20568	61.4983	4.687e-16
12350	36.9265	0	51742	154.709	0	51466	153.883	0	35746	106.88	0	58732	175.609	0	26661	79.7164	0	20013	59.8389	0	19213	57.4469	1.439e-15	39990	119.57	0	33505	100.18	0							5608	16.7679	0				20575	61.5192	0
12355	36.9415	0	51843	155.011	0	51497	153.976	0	35749	106.889	0	58746	175.65	0	26667	79.7343	0	20021	59.8628	0	19215	57.4528	0	40105	119.914	0	33541	100.288	0							5631	16.8367	7.631e-16				20611	61.6269	0
12357	36.9474	0	51908	155.205	0	51500	153.985	0	35772	106.958	0	58840	175.932	0	26807	80.1529	0	20050	59.9495	0	19290	57.6771	0	40149	120.046	3.947e-15	33566	100.362	0							5635	16.8486	0				20617	61.6448	0
12368	36.9803	0	51958	155.354	0	51504	153.997	0	35774	106.964	0	59806	178.82	0	26811	80.1649	0	20058	59.9734	0	19326	57.7847	0	40150	120.049	0	33602	100.47	2.335e-14							5640	16.8636	0				20703	61.902	0
12373	36.9953	0	51995	155.465	0	51519	154.042	0	35786	107	0	60292	180.273	0	26827	80.2127	0	20102	60.105	0	19418	58.0598	0	40306	120.515	0	33732	100.859	4.144e-16							5644	16.8756	0				20712	61.9289	0
12398	37.07	0	52025	155.555	0	51535	154.09	0	35811	107.075	0	60392	180.572	0	26833	80.2307	0	20104	60.111	0	19457	58.1764	0	40648	121.537	0	33733	100.862	0							5656	16.9114	0				20829	62.2787	0
12402	37.082	0	52073	155.698	0	51539	154.102	0	35825	107.117	0				26836	80.2396	0	20109	60.1259	0	19463	58.1944	0	40661	121.576	0	33764	100.954	0							5661	16.9264	2.835e-15				20845	62.3265	0
12408	37.0999	0	52079	155.716	0	51549	154.131	0	35848	107.186	0				26969	80.6373	0	20131	60.1917	0	19472	58.2213	0	40700	121.693	0	33789	101.029	0							5667	16.9443	1.235e-14				20862	62.3774	0
12415	37.1208	0	52083	155.728	0	51562	154.17	0	35865	107.236	0				27100	81.029	0	20152	60.2545	0	19511	58.3379	0	40703	121.702	0	33793	101.041	0							5669	16.9503	1.793e-15				20881	62.4342	0
12426	37.1537	0	52096	155.767	0	51572	154.2	8.518e-16	35880	107.281	0				27104	81.041	0	20156	60.2664	0	19552	58.4605	0	40862	122.177	0	33853	101.221	0							5671	16.9563	0				20894	62.4731	0
12461	37.2584	0	52154	155.94	0	51574	154.206	0	35990	107.61	0				27138	81.1426	0	20231	60.4907	0	19598	58.598	1.166e-15	40868	122.195	0	33889	101.328	0							5675	16.9683	6.749e-16				21121	63.1518	0
12464	37.2674	0	52195	156.063	0	51579	154.221	0	35992	107.616	0				27152	81.1845	0	20257	60.5684	0	19610	58.6339	0	41140	123.009	2.102e-15	33893	101.34	0							5681	16.9862	0				21161	63.2714	0
12478	37.3092	0	52203	156.087	0	51603	154.293	0	36047	107.781	0				27268	81.5313	0	20268	60.6013	0	19648	58.7475	0	41297	123.478	0	33909	101.388	0							5688	17.0071	0				21164	63.2804	0
12492	37.3511	0	52393	156.655	0	51632	154.38	0	36057	107.81	0				27307	81.6479	0	20371	60.9093	1.714e-14	19655	58.7685	1.165e-15	41309	123.514	0	33915	101.406	0							5700	17.043	1.576e-15				21197	63.379	0
12515	37.4199	0	52406	156.694	0	51657	154.454	0	36129	108.026	0				27360	81.8064	0	20431	61.0887	0	19696	58.891	0	41345	123.621	0	33942	101.487	0							5702	17.049	0				21248	63.5315	0
12543	37.5036	0	52504	156.987	0	51667	154.484	0	36144	108.071	0				27362	81.8124	0	20452	61.1515	0	19701	58.906	0	41358	123.66	2.344e-15	34008	101.684	0							5710	17.0729	6.248e-16				21267	63.5883	0
12556	37.5424	0	52525	157.05	0	51703	154.592	0	36176	108.166	0				27378	81.8602	0	20461	61.1784	0	19733	59.0017	0	41506	124.103	0	34046	101.797	0							5716	17.0908	2.75e-15				21314	63.7289	0
12568	37.5783	0	52625	157.349	0	51709	154.61	0	36247	108.379	0				27431	82.0187	0	20466	61.1933	0	19737	59.0136	0	41871	125.194	0	34067	101.86	0							5744	17.1746	0				21386	63.9441	0
12571	37.5873	0	52928	158.255	0	51714	154.625	0	36262	108.423	0				27449	82.0725	0	20511	61.3279	0	19763	59.0914	0	41959	125.457	0	34079	101.896	0							5755	17.2075	0				21552	64.4405	0
12597	37.665	0	53022	158.536	0	51762	154.768	0	36285	108.492	0				27473	82.1443	0	20515	61.3398	0	19794	59.1841	0	42054	125.742	0	34178	102.192	0							5781	17.2852	5.835e-15				21558	64.4584	0
12609	37.7009	0	53096	158.757	0	51812	154.918	0	36296	108.525	0				27478	82.1592	0	20553	61.4535	0	19800	59.202	1.697e-15	42179	126.115	0	34197	102.249	0							5784	17.2942	0				21561	64.4674	0
12634	37.7757	0	53128	158.853	0	51830	154.972	0	36318	108.591	0				27530	82.3147	0	20609	61.6209	0	19892	59.4771	0	42198	126.172	8.426e-16	34201	102.261	0							5785	17.2971	0				21569	64.4913	0
12647	37.8145	0	53143	158.898	0	51892	155.157	0	36320	108.597	0				27678	82.7572	0	20645	61.7285	0	19898	59.495	0	42242	126.304	0	34217	102.309	4.311e-16							5787	17.3031	0				21626	64.6617	0
12678	37.9072	0	53564	160.156	0	51899	155.178	0	36323	108.606	0				27797	83.113	0	20709	61.9199	0	19986	59.7581	0	42340	126.597	5.951e-16	34219	102.315	0							5807	17.3629	0				21631	64.6767	0
12691	37.9461	0	53577	160.195	0	52022	155.546	0	36329	108.624	0				27907	83.4419	0	20715	61.9378	8.183e-15	19995	59.785	0	42596	127.362	9.863e-16	34252	102.413	0							5808	17.3659	0				21749	65.0295	0
12704	37.985	0	53664	160.455	0	52038	155.594	0	36362	108.722	0				27931	83.5137	0	20800	62.192	0	19999	59.797	0	42640	127.494	0	34277	102.488	0							5812	17.3779	1.094e-15				21763	65.0714	0
12729	38.0597	0	53770	160.772	0	52098	155.773	0	36366	108.734	0				27939	83.5376	0	20802	62.198	0	20008	59.8239	0	42685	127.628	9.674e-16	34410	102.886	0							5817	17.3928	1.219e-15				21787	65.1431	0
12741	38.0956	0	53798	160.856	0	52159	155.955	0	36387	108.797	0				27962	83.6064	0	20821	62.2548	0	20011	59.8329	0	42703	127.682	0	34538	103.269	0							5829	17.4287	0				21790	65.1521	0
12753	38.1315	0	53831	160.955	0	52197	156.069	0	36404	108.848	0				28005	83.7349	0	20837	62.3026	0	20099	60.096	0	42748	127.817	0	34557	103.325	1.193e-15							5836	17.4496	6.5e-15				21866	65.3793	0
12757	38.1434	0	53919	161.218	0	52211	156.111	1.54e-15	36449	108.983	0				28042	83.8456	0	20870	62.4013	0	20103	60.108	0	42829	128.059	0	34639	103.571	0							5837	17.4526	0				21887	65.4421	0
12786	38.2301	0	54069	161.666	0	52214	156.12	0	36469	109.042	0				28064	83.9114	0	20911	62.5239	0	20114	60.1409	2.611e-15	42875	128.196	0	34688	103.717	1.028e-15							5840	17.4616	0				21889	65.4481	0
12805	38.2869	0	54426	162.734	0	52225	156.153	0	36484	109.087	0				28072	83.9353	0	20912	62.5269	0	20186	60.3561	0	42944	128.403	0	34753	103.912	0							5843	17.4706	2.162e-15				21984	65.7322	0
12853	38.4305	0	54757	163.723	0	52250	156.227	0	36547	109.275	0				28101	84.022	0	20985	62.7452	0	20207	60.4189	0	42986	128.528	0	34796	104.04	0							5846	17.4795	0				22018	65.8338	0
12860	38.4514	0	54891	164.124	0	52261	156.26	0	36610	109.464	0				28105	84.034	0	21017	62.8408	0	20208	60.4219	5.346e-16	42996	128.558	0	34809	104.079	2.463e-14							5851	17.4945	0				22054	65.9415	0
12876	38.4992	0	54905	164.166	0	52273	156.296	0	36684	109.685	0				28129	84.1057	0	21118	63.1428	0	20251	60.5505	0	43025	128.645	0	34848	104.195	0							5855	17.5065	0				22066	65.9773	0
12896	38.559	0	54954	164.312	0	52340	156.497	0	36715	109.778	0				28167	84.2193	0	21179	63.3252	0	20307	60.7179	0	43074	128.791	0	34996	104.638	0							5858	17.5154	0				22079	66.0162	0
12900	38.571	0	55140	164.869	0	52388	156.64	0	36756	109.9	0				28169	84.2253	0	21183	63.3372	0	20314	60.7389	0	43309	129.494	0	35008	104.674	0							5864	17.5334	5.522e-16				22086	66.0371	0
12941	38.6936	0	55222	165.114	0	52408	156.7	0	36764	109.924	0				28173	84.2373	0	21217	63.4388	0	20323	60.7658	0	43326	129.545	0	35076	104.877	0							5874	17.5633	0				22091	66.0521	0
12964	38.7624	0	55258	165.221	0	52441	156.799	0	37282	111.473	0				28207	84.3389	0	21295	63.672	0	20348	60.8405	0	43459	129.942	0	35084	104.901	0							5876	17.5692	0				22110	66.1089	0
12988	38.8341	0	55292	165.323	0	52885	158.126	0	37288	111.491	0				28216	84.3658	0	21299	63.684	0	20355	60.8614	8.481e-16	43596	130.352	0	35149	105.096	0							5891	17.6141	0				22182	66.3242	0
13011	38.9029	0	55334	165.449	0	52937	158.282	0	37415	111.871	0				28269	84.5243	0	21309	63.7139	0	20368	60.9003	0	43708	130.687	0	35155	105.114	6.864e-15							5893	17.6201	0				22199	66.375	0
13038	38.9836	0	55401	165.649	0	53012	158.506	0	37442	111.952	0				28270	84.5273	0	21325	63.7617	0	20464	61.1874	2.227e-15	43720	130.723	0	35216	105.296	0							5899	17.638	1.516e-15				22216	66.4258	0
13048	39.0135	0	55414	165.688	0	53020	158.53	0	37486	112.083	0				28301	84.62	0	21360	63.8664	0	20468	61.1993	0	43792	130.938	0	35232	105.344	0							5906	17.6589	0				22281	66.6202	0
13093	39.1481	0	55431	165.739	0	53055	158.635	0	37492	112.101	0				28345	84.7515	0	21522	64.3508	0	20494	61.2771	0	43823	131.031	5.265e-16	35378	105.78	0							5907	17.6619	1.558e-14				22300	66.677	0
13101	39.172	0	55439	165.763	0	53080	158.709	0	37514	112.167	0				28375	84.8413	0	21534	64.3867	0	20523	61.3638	0	43929	131.348	0	35440	105.966	2.71e-15							5911	17.6739	6.78e-16				22317	66.7278	0
13103	39.178	0	55445	165.781	0	53456	159.833	0	37517	112.176	0				28377	84.8472	0	21558	64.4584	0	20564	61.4864	0	44132	131.955	0	35441	105.969	0							5913	17.6799	0				22332	66.7727	0
13125	39.2437	0	55482	165.891	0	53473	159.884	0	37575	112.349	0				28380	84.8562	0	21575	64.5092	0	20586	61.5521	1.047e-14	44273	132.376	0	35473	106.064	0							5925	17.7157	0				22370	66.8863	0
13143	39.2976	0	55530	166.035	0	53548	160.108	0	37578	112.358	0				28403	84.925	0	21586	64.5421	0	20589	61.5611	0	44535	133.16	0	35508	106.169	0							5931	17.7337	3.246e-15				22421	67.0388	0
13162	39.3544	0	55629	166.331	0	53604	160.276	0	37602	112.43	0				28405	84.9309	0	21648	64.7275	0	20631	61.6867	4.435e-16	44539	133.172	0	35536	106.253	0							5942	17.7666	6.968e-16				22531	67.3677	0
13190	39.4381	0	55636	166.352	0	53695	160.548	0	37664	112.615	0				28581	85.4572	0	21661	64.7664	0	20701	61.896	0	44669	133.56	0	35642	106.57	0							5954	17.8025	1.572e-15				22536	67.3826	0
13211	39.5009	0	55676	166.471	0	53913	161.2	0	37708	112.747	0				28587	85.4751	0	21677	64.8142	0	20727	61.9737	0	44703	133.662	0	35659	106.62	0							5969	17.8473	0				22551	67.4275	0
13231	39.5607	0	55703	166.552	0	54094	161.741	0	37767	112.923	0				28600	85.514	0	21767	65.0833	0	20750	62.0425	0	44758	133.826	0	35714	106.785	0							5970	17.8503	9.5e-16				22600	67.574	0
13273	39.6863	0	55800	166.842	0	54099	161.756	0	37778	112.956	0				28629	85.6007	0	21808	65.2059	0	20819	62.2488	0	44860	134.131	0	35763	106.931	0							5978	17.8742	0				22639	67.6906	4.801e-16
13284	39.7192	0	55850	166.992	0	54107	161.78	0	37810	113.052	0				28671	85.7263	0	21840	65.3016	0	20841	62.3146	0	44974	134.472	1.358e-15	35891	107.314	0							5979	17.8772	8.085e-16				22646	67.7115	0
13323	39.8358	0	56037	167.551	0	54274	162.279	0	37849	113.168	0				28712	85.8489	0	21859	65.3584	0	20849	62.3385	7.591e-16	44988	134.514	0	35922	107.407	0							5982	17.8862	0				22651	67.7265	0
13381	40.0092	0	56061	167.622	0	54286	162.315	0	37863	113.21	0				28744	85.9446	0	21892	65.4571	0	20850	62.3415	0	45116	134.897	0	35927	107.422	0							5987	17.9011	5.431e-15				22665	67.7683	0
13396	40.054	0	56073	167.658	0	54454	162.817	0	37943	113.45	0				28748	85.9565	0	21897	65.472	0	20862	62.3774	0	45138	134.963	4.587e-16	35943	107.47	0							5991	17.9131	1.688e-15				22673	67.7923	0
13472	40.2813	0	56086	167.697	0	54460	162.835	0	37995	113.605	0				28772	86.0283	0	21916	65.5288	0	20896	62.479	0	45255	135.312	1.682e-15	35962	107.526	0							5995	17.925	0				22849	68.3185	0
13486	40.3231	0	56248	168.181	0	54630	163.344	0	37999	113.617	0				28820	86.1718	0	21925	65.5558	0	20907	62.5119	0	45778	136.876	1.261e-15	36027	107.721	0							6003	17.949	4.955e-15				22873	68.3903	0
13492	40.3411	0	56689	169.5	0	54728	163.637	0	38052	113.775	0				29195	87.2931	0	21952	65.6365	0	20941	62.6136	0	45788	136.906	0	36037	107.751	0							6039	18.0566	9.602e-16				22977	68.7012	0
13503	40.374	0	56702	169.539	0	54791	163.825	0	38086	113.877	0				29238	87.4216	0	21959	65.6574	0	20970	62.7003	0	45897	137.232	2.84e-15	36064	107.831	0							6055	18.1044	7.426e-16				23002	68.776	0
13505	40.38	0	56826	169.91	0	54801	163.855	0	38099	113.916	0				29248	87.4515	0	21968	65.6843	0	21036	62.8976	0	46048	137.684	0	36080	107.879	0							6060	18.1194	6.971e-15				23026	68.8477	0
13508	40.3889	0	56971	170.343	0	54833	163.951	0	38111	113.952	0				29297	87.598	0	21972	65.6963	0	21054	62.9515	0	46077	137.77	0	36089	107.906	0							6081	18.1822	0				23072	68.9853	0
13532	40.4607	0	57072	170.645	0	55002	164.456	0	38194	114.2	0				29461	88.0884	0	22026	65.8577	0	21065	62.9843	0	46180	138.078	6.399e-16	36141	108.062	0							6085	18.1942	6.521e-15				23082	69.0152	0
13538	40.4786	0	57183	170.977	0	55314	165.389	0	38249	114.365	0				29464	88.0974	0	22041	65.9026	0	21081	63.0322	2.22e-15	46217	138.189	4.31e-16	36153	108.097	0							6088	18.2031	0				23086	69.0271	0
13541	40.4876	0	57215	171.073	0	55323	165.416	0	38326	114.595	0				29500	88.205	0	22101	66.082	0	21086	63.0471	5.107e-16	46420	138.796	0	36213	108.277	0							6094	18.2211	0				23095	69.0541	0
13650	40.8135	0	57359	171.503	0	55438	165.76	0	38343	114.646	0				29515	88.2498	0	22108	66.1029	0	21151	63.2415	1.058e-15	46453	138.894	0	36249	108.385	0							6096	18.227	3.407e-15				23136	69.1766	0
13653	40.8225	0	57504	171.937	0	55600	166.244	0	38349	114.663	0				29612	88.5399	0	22118	66.1328	0	21212	63.4239	0	46515	139.08	1.118e-15	36287	108.498	0							6103	18.248	0				23178	69.3022	0
13665	40.8584	0	57546	172.062	0	55674	166.465	0	38368	114.72	0				29622	88.5698	0	22150	66.2285	0	21235	63.4926	0	46577	139.265	3.276e-15	36459	109.012	0							6111	18.2719	3.636e-16				23199	69.365	0
13666	40.8613	0	57571	172.137	0	55734	166.645	0	38399	114.813	0				29642	88.6296	0	22209	66.4049	0	21260	63.5674	0	46620	139.394	0	36526	109.213	0							6113	18.2779	4.672e-16				23208	69.3919	0
13672	40.8793	0	57613	172.263	0	55906	167.159	0	38405	114.831	0				29709	88.8299	0	22257	66.5484	0	21274	63.6093	0	46674	139.555	0	36535	109.24	0							6120	18.2988	2.147e-15				23233	69.4667	0
13729	41.0497	0	57685	172.478	0	55970	167.35	0	38416	114.864	0				29939	89.5176	0	22306	66.6949	0	21287	63.6481	4.007e-16	46810	139.962	0	36576	109.362	0							6133	18.3377	0				23330	69.7567	0
13758	41.1364	0	57689	172.49	0	55999	167.437	0	38425	114.891	0				29961	89.5834	0	22327	66.7577	0	21315	63.7319	0	46818	139.986	6.748e-16	36722	109.799	0							6152	18.3945	0				23353	69.8255	0
13778	41.1962	0	57722	172.589	0	56094	167.721	0	38503	115.124	0				29969	89.6073	0	22354	66.8385	0	21387	63.9471	0	46855	140.096	2.057e-15	36779	109.969	0							6158	18.4124	0				23361	69.8494	0
13780	41.2022	0	57873	173.04	0	56168	167.942	0	38518	115.169	0				30000	89.7	0	22472	67.1913	0	21455	64.1505	4.626e-16	46864	140.123	0	36841	110.155	0							6160	18.4184	0				23451	70.1185	0
13813	41.3009	0	57998	173.414	0	56200	168.038	0	38622	115.48	0				30028	89.7837	0	22523	67.3438	1.402e-15	21464	64.1774	0	46867	140.132	0	36848	110.175	0							6173	18.4573	0				23501	70.268	0
13815	41.3068	0	58003	173.429	0	56233	168.137	0	38654	115.576	0				30110	90.0289	0	22570	67.4843	0	21493	64.2641	6.244e-16	46881	140.174	0	36867	110.232	0							6193	18.5171	0				23526	70.3427	0
13841	41.3846	0	58009	173.447	0	56251	168.19	0	38698	115.707	0				30126	90.0767	0	22587	67.5351	0	21495	64.27	0	47012	140.566	0	36944	110.463	0							6199	18.535	0				23531	70.3577	0
13893	41.5401	0	58106	173.737	0	56263	168.226	0	38766	115.91	0				30141	90.1216	0	22597	67.565	5.232e-16	21497	64.276	0	47200	141.128	0	37010	110.66	0							6200	18.538	1.86e-15				23541	70.3876	0
13899	41.558	0	58467	174.816	0	56270	168.247	0	38791	115.985	0				30142	90.1246	0	22607	67.5949	0	21601	64.587	0	47267	141.328	0	37125	111.004	0							6206	18.5559	6.844e-16				23556	70.4324	0
13924	41.6328	0	58481	174.858	0	56276	168.265	0	38821	116.075	0				30167	90.1993	0	22623	67.6428	0	21614	64.6259	0	47272	141.343	0	37131	111.022	0							6211	18.5709	0				23577	70.4952	0
13953	41.7195	0	58566	175.112	0	56282	168.283	0	38900	116.311	0				30172	90.2143	0	22662	67.7594	0	21615	64.6288	0	47326	141.505	0	37168	111.132	0							6214	18.5799	2.664e-15				23616	70.6118	0
14016	41.9078	0	58620	175.274	7.768e-16	56298	168.331	0	38916	116.359	0				30211	90.3309	0	22687	67.8341	0	21711	64.9159	0	47443	141.855	0	37251	111.38	0							6217	18.5888	0				23622	70.6298	0
14065	42.0543	0	58972	176.326	0	56308	168.361	0	38952	116.466	0				30236	90.4056	0	22841	68.2946	0	21743	65.0116	0	47501	142.028	0	37306	111.545	0							6237	18.6486	0				23679	70.8002	0
14076	42.0872	0	59021	176.473	0	56347	168.477	0	38975	116.535	0				30299	90.594	0	22845	68.3066	0	21771	65.0953	0	47596	142.312	0	37326	111.605	0							6244	18.6696	9.3e-16				23683	70.8122	0
14077	42.0902	0	59035	176.515	0	56366	168.534	0	39101	116.912	0				30391	90.8691	0	22910	68.5009	0	21813	65.2209	0	47861	143.104	0	37327	111.608	0							6249	18.6845	4.339e-15				23724	70.9348	0
14110	42.1889	0	59243	177.137	0	56481	168.878	0	39187	117.169	0				30412	90.9319	0	22926	68.5487	5.333e-16	21829	65.2687	0	47919	143.278	1.898e-15	37381	111.769	6.543e-16							6260	18.7174	3.757e-16				23748	71.0065	0
14130	42.2487	0	59253	177.167	0	56664	169.425	0	39191	117.181	0				30433	90.9947	0	22931	68.5637	0	21852	65.3375	0	48123	143.888	0	37382	111.772	0							6267	18.7383	7.167e-16				23750	71.0125	0
14155	42.3235	0	59258	177.181	0	56667	169.434	0	39200	117.208	0				30437	91.0066	0	22973	68.6893	0	21867	65.3823	0	48131	143.912	0	37487	112.086	0							6276	18.7652	0				23798	71.156	0
14158	42.3324	0	59264	177.199	0	56792	169.808	0	39206	117.226	0				30442	91.0216	0	23003	68.779	0	21877	65.4122	0	48233	144.217	0	37491	112.098	0							6279	18.7742	0				23852	71.3175	0
14178	42.3922	0	59281	177.25	0	56822	169.898	0	39208	117.232	0				30445	91.0306	0	23053	68.9285	0	21878	65.4152	0	48402	144.722	3.688e-15	37569	112.331	0							6292	18.8131	0				23872	71.3773	0
14181	42.4012	0	59300	177.307	0	56846	169.97	0	39214	117.25	0				30462	91.0814	0	23104	69.081	0	21912	65.5169	5.568e-16	48433	144.815	0	37573	112.343	0							6299	18.834	6.979e-16				23883	71.4102	0
14194	42.4401	0	59305	177.322	0	57037	170.541	0	39228	117.292	0				30507	91.2159	0	23105	69.084	0	21945	65.6155	0	48437	144.827	0	37589	112.391	0							6304	18.849	0				23910	71.4909	0
14225	42.5328	0	59343	177.436	0	57053	170.589	0	39231	117.301	0				30529	91.2817	0	23112	69.1049	0	21984	65.7322	0	48445	144.851	0	37621	112.487	0							6322	18.9028	0				23958	71.6344	0
14230	42.5477	0	59351	177.459	0	57062	170.615	0	39236	117.316	0				30590	91.4641	0	23116	69.1168	0	22041	65.9026	1.286e-14	48472	144.931	0	37772	112.938	0							6326	18.9147	0				23968	71.6643	0
14272	42.6733	0	59375	177.531	0	57075	170.654	0	39242	117.334	0				30647	91.6345	0	23119	69.1258	0	22068	65.9833	0	48498	145.009	7.345e-16	37904	113.333	0							6331	18.9297	0				23981	71.7032	0
14288	42.7211	0	59416	177.654	0	57144	170.861	0	39264	117.399	0				30656	91.6614	0	23123	69.1378	0	22073	65.9983	0	48534	145.117	6.102e-15	37915	113.366	0							6334	18.9387	3.945e-16				24148	72.2025	0
14303	42.766	0	59574	178.126	0	57203	171.037	0	39285	117.462	0				30696	91.781	0	23130	69.1587	0	22098	66.073	0	48555	145.179	0	37916	113.369	1.238e-15							6346	18.9745	0				24169	72.2653	0
14327	42.8377	0	59705	178.518	0	57246	171.166	0	39293	117.486	0				30723	91.8618	0	23249	69.5145	0	22138	66.1926	0	48620	145.374	0	37928	113.405	0							6349	18.9835	0				24177	72.2892	0
14343	42.8856	0	59713	178.542	0	57265	171.222	0	39300	117.507	0				30743	91.9216	0	23327	69.7477	0	22159	66.2554	1.338e-15	48639	145.431	4.936e-15	37937	113.432	0							6353	18.9955	0				24279	72.5942	0
14366	42.9543	0	59790	178.772	0	57292	171.303	0	39313	117.546	0				30828	92.1757	0	23368	69.8703	0	22189	66.3451	0	48650	145.464	0	37994	113.602	0							6386	19.0941	0				24313	72.6959	0
14377	42.9872	0	59933	179.2	0	57380	171.566	0	39315	117.552	0				30919	92.4478	0	23369	69.8733	0	22233	66.4767	0	48657	145.484	0	38132	114.015	6.271e-16							6410	19.1659	0				24328	72.7407	0
14426	43.1337	0	60020	179.46	0	57418	171.68	0	39323	117.576	0				30953	92.5495	0	23395	69.951	0	22248	66.5215	3.836e-16	48770	145.822	5.442e-16	38143	114.048	0							6413	19.1749	0				24429	73.0427	0
14427	43.1367	0	60074	179.621	0	57420	171.686	0	39326	117.585	0				30982	92.6362	0	23447	70.1065	0	22280	66.6172	0	48810	145.942	0	38152	114.075	0							6421	19.1988	1.144e-15				24453	73.1145	0
14429	43.1427	0				57444	171.758	0	39329	117.594	0				31019	92.7468	0	23449	70.1125	0	22317	66.7278	0	48918	146.265	0	38163	114.107	0							6434	19.2377	1.38e-15				24502	73.261	8.248e-16
14479	43.2922	0				57652	172.38	0	39348	117.65	0				31122	93.0548	0	23562	70.4504	7.472e-16	22323	66.7458	1.332e-15	48948	146.355	0	38209	114.245	0							6435	19.2406	0				24510	73.2849	0
14487	43.3161	0				57663	172.412	0	39361	117.689	0				31225	93.3628	0	23582	70.5102	0	22443	67.1046	0	48999	146.507	9.69e-15	38232	114.314	0							6438	19.2496	7.322e-15				24513	73.2939	0
14490	43.3251	0				57704	172.535	0	39364	117.698	0				31248	93.4315	0	23650	70.7135	0	22499	67.272	0	49071	146.722	0	38424	114.888	0							6449	19.2825	0				24530	73.3447	0
14501	43.358	0				57787	172.783	0	39368	117.71	0				31304	93.599	0	23681	70.8062	0	22502	67.281	0	49148	146.952	0	38447	114.957	0							6453	19.2945	0				24535	73.3597	0
14571	43.5673	0				57862	173.007	0	39373	117.725	0				31322	93.6528	0	23706	70.8809	0	22540	67.3946	2.557e-15	49167	147.009	0	38456	114.983	0							6454	19.2975	2.948e-15				24592	73.5301	4.69e-16
14593	43.6331	0				57889	173.088	0	39390	117.776	0				31347	93.7275	0	23870	71.3713	0	22562	67.4604	0	49191	147.081	0	38495	115.1	0							6455	19.3005	0				24605	73.569	0
14602	43.66	0				57902	173.127	0	39395	117.791	0				31415	93.9309	0	23914	71.5029	0	22569	67.4813	1.718e-15	49198	147.102	0	38505	115.13	0							6465	19.3303	0				24617	73.6048	0
14612	43.6899	0				57940	173.241	0	39400	117.806	0				31468	94.0893	0	24009	71.7869	4.496e-14	22590	67.5441	0	49201	147.111	2.848e-15	38533	115.214	0							6471	19.3483	0				24627	73.6347	0
14639	43.7706	0				57963	173.309	0	39405	117.821	0				31519	94.2418	0	24010	71.7899	0	22614	67.6159	0	49272	147.323	0	38541	115.238	0							6475	19.3603	0				24722	73.9188	0
14644	43.7856	0				57971	173.333	0	39427	117.887	0				31547	94.3255	0	24083	72.0082	2.473e-14	22630	67.6637	0	49486	147.963	0	38548	115.258	0							6492	19.4111	0				24797	74.143	0
14649	43.8005	0				58097	173.71	0	39440	117.926	0				31590	94.4541	0	24090	72.0291	0	22711	67.9059	0	49503	148.014	0	38754	115.874	0							6494	19.4171	5.967e-16				24833	74.2507	0
14665	43.8484	0				58171	173.931	0	39457	117.976	0				31633	94.5827	0	24114	72.1009	0	22718	67.9268	0	49634	148.406	0	38763	115.901	0							6499	19.432	1.817e-15				24857	74.3224	0
14666	43.8513	0				58177	173.949	0	39459	117.982	0				31680	94.7232	0	24120	72.1188	0	22733	67.9717	0	49724	148.675	0	38825	116.087	0							6534	19.5367	0				24866	74.3493	0
14677	43.8842	0				58193	173.997	0	39494	118.087	0				31696	94.771	0	24140	72.1786	0	22745	68.0075	5.46e-16	49782	148.848	0	38905	116.326	0							6552	19.5905	1.477e-15				24869	74.3583	0
14687	43.9141	0				58404	174.628	0	39497	118.096	0				31790	95.0521	0	24155	72.2234	0	22748	68.0165	0	49997	149.491	0	39040	116.73	0							6562	19.6204	8.392e-16				24917	74.5018	0
14712	43.9889	0				58673	175.432	0	39503	118.114	0				31874	95.3033	0	24159	72.2354	8.291e-15	22774	68.0943	0	50008	149.524	0	39049	116.757	0							6563	19.6234	0				24929	74.5377	0
14748	44.0965	0				58693	175.492	0	39505	118.12	0				31880	95.3212	0	24243	72.4866	0	22781	68.1152	0	50112	149.835	0	39069	116.816	0							6565	19.6293	5.287e-16				24938	74.5646	0
14768	44.1563	0				58767	175.713	0	39519	118.162	0				31889	95.3481	0	24306	72.6749	0	22790	68.1421	1.045e-15	50156	149.966	0	39072	116.825	0							6569	19.6413	0				24979	74.6872	0
14778	44.1862	0				58785	175.767	0	39526	118.183	0				31919	95.4378	0	24442	73.0816	0	22791	68.1451	0	50167	149.999	0	39201	117.211	0							6584	19.6862	0				25014	74.7919	0
14785	44.2071	0				58863	176	0	39555	118.269	0				31981	95.6232	0	24450	73.1055	0	22794	68.1541	6.967e-16	50284	150.349	0	39227	117.289	0							6594	19.7161	7.151e-16				25052	74.9055	0
14788	44.2161	0				58869	176.018	0	39622	118.47	0				31983	95.6292	0	24463	73.1444	0	22825	68.2468	4.253e-16	50364	150.588	0	39229	117.295	0							6604	19.746	0				25101	75.052	0
14815	44.2968	0				58907	176.132	0	39667	118.604	0				32048	95.8235	0	24488	73.2191	0	22853	68.3305	0	50415	150.741	0	39355	117.671	0							6608	19.7579	4.9e-16				25131	75.1417	0
14900	44.551	0				58955	176.275	0	39683	118.652	0				32089	95.9461	0	24519	73.3118	0	22878	68.4052	9.873e-16	50428	150.78	0	39377	117.737	0							6611	19.7669	0				25144	75.1806	0
14980	44.7902	0				59039	176.527	0	39689	118.67	0				32107	95.9999	0	24591	73.5271	0	22922	68.5368	1.316e-15	50437	150.807	0	39517	118.156	0							6614	19.7759	0				25341	75.7696	0
14981	44.7932	0				59061	176.592	0	39693	118.682	0				32173	96.1973	0	24697	73.844	0	22957	68.6414	0	50489	150.962	0	39525	118.18	9.4e-16							6622	19.7998	0				25344	75.7786	0
15012	44.8859	0				59089	176.676	0	39728	118.787	0				32225	96.3528	0	24714	73.8949	0	22960	68.6504	0	50548	151.138	0	39526	118.183	0							6628	19.8177	0				25380	75.8862	0
15041	44.9726	0				59139	176.826	0	39743	118.832	0				32283	96.5262	0	24738	73.9666	0	22962	68.6564	0	50674	151.515	0	39536	118.213	0							6630	19.8237	0				25382	75.8922	0
15049	44.9965	0				59154	176.87	0	39872	119.217	0				32293	96.5561	0	24811	74.1849	0	23011	68.8029	0	50777	151.823	8.967e-16	39549	118.251	0							6633	19.8327	1.288e-15				25392	75.9221	0
15084	45.1012	0				59462	177.791	0	39904	119.313	0				32299	96.574	0	24831	74.2447	0	23022	68.8358	0	50890	152.161	0	39566	118.302	0							6639	19.8506	0				25453	76.1045	0
15112	45.1849	0				59558	178.078	0	39911	119.334	0				32345	96.7116	0	24843	74.2806	0	23050	68.9195	0	50916	152.239	0	39583	118.353	0							6648	19.8775	0				25516	76.2928	0
15118	45.2028	0				59637	178.315	0	39929	119.388	0				32413	96.9149	0	24854	74.3135	0	23082	69.0152	0	50979	152.427	0	39586	118.362	0							6686	19.9911	0				25526	76.3227	0
15149	45.2955	0				59689	178.47	0	39936	119.409	0				32541	97.2976	0	24861	74.3344	0	23112	69.1049	0	51217	153.139	5.62e-16	39655	118.568	0							6697	20.024	0				25551	76.3975	0
15187	45.4091	0				59869	179.008	0	39976	119.528	0				32629	97.5607	0	24898	74.445	0	23121	69.1318	0	51259	153.264	0	39673	118.622	0							6704	20.045	0				25583	76.4932	0
15200	45.448	0				60028	179.484	0	39989	119.567	0				32689	97.7401	0	24942	74.5766	0	23165	69.2634	4.465e-16	51324	153.459	0	39717	118.754	4.825e-16							6707	20.0539	4.927e-16				25670	76.7533	0
15206	45.4659	0				60050	179.549	0	40014	119.642	0				32740	97.8926	0	24998	74.744	0	23208	69.3919	0	51398	153.68	0	39718	118.757	0							6722	20.0988	0				25695	76.8281	0
15272	45.6633	0				60141	179.822	0	40025	119.675	0				32760	97.9524	0	25023	74.8188	0	23226	69.4457	0	51510	154.015	0	39810	119.032	0							6729	20.1197	0				25747	76.9835	0
15287	45.7081	0				60219	180.055	0	40079	119.836	0				32777	98.0032	0	25119	75.1058	0	23314	69.7089	0	51511	154.018	1.258e-15	39821	119.065	0							6737	20.1436	0				25815	77.1869	0
15289	45.7141	0				60351	180.45	0	40082	119.845	0				32834	98.1737	0	25162	75.2344	0	23333	69.7657	2.144e-15	51805	154.897	0	39919	119.358	0							6753	20.1915	0				25839	77.2586	0
15291	45.7201	0							40094	119.881	0				32948	98.5145	0	25203	75.357	0	23349	69.8135	0	51807	154.903	0	40037	119.711	0							6755	20.1974	0				25893	77.4201	0
15308	45.7709	0							40102	119.905	0				32949	98.5175	0	25206	75.3659	0	23364	69.8584	0	51834	154.984	0	40147	120.04	0							6784	20.2842	0				25914	77.4829	0
15343	45.8756	0							40155	120.064	0				33042	98.7956	0	25226	75.4257	0	23394	69.9481	0	51900	155.181	0	40164	120.09	0							6799	20.329	3.134e-15				26004	77.752	0
15344	45.8786	0							40190	120.168	0				33082	98.9152	0	25265	75.5423	0	23414	70.0079	0	51988	155.444	0	40187	120.159	5.958e-16							6819	20.3888	0				26038	77.8536	0
15360	45.9264	0							40192	120.174	0				33225	99.3427	0	25306	75.6649	0	23436	70.0736	0	52021	155.543	0	40229	120.285	0							6825	20.4067	0				26050	77.8895	0
15368	45.9503	0							40220	120.258	0				33284	99.5192	0	25309	75.6739	0	23450	70.1155	0	52161	155.961	5.415e-16	40363	120.685	0							6833	20.4307	0				26053	77.8985	0
15390	46.0161	0							40270	120.407	0				33351	99.7195	5.28e-15	25338	75.7606	0	23452	70.1215	0	52164	155.97	3.777e-16	40378	120.73	6.338e-16							6837	20.4426	6.574e-15				26113	78.0779	0
15399	46.043	0							40571	121.307	0				33372	99.7823	0	25342	75.7726	0	23470	70.1753	0	52168	155.982	0	40395	120.781	0							6844	20.4636	0				26161	78.2214	0
15402	46.052	0							40659	121.57	0				33442	99.9916	0	25387	75.9071	0	23488	70.2291	0	52203	156.087	1.241e-15	40405	120.811	1.613e-15							6853	20.4905	0				26175	78.2632	0
15404	46.058	0							40729	121.78	0				33474	100.087	0	25410	75.9759	0	23504	70.277	0	52204	156.09	0	40464	120.987	0							6858	20.5054	0				26249	78.4845	0
15409	46.0729	0							40892	122.267	0				33475	100.09	0	25426	76.0237	0	23602	70.57	0	52299	156.374	0	40488	121.059	0							6878	20.5652	0				26275	78.5623	0
15414	46.0879	0							41091	122.862	0				33539	100.282	0	25445	76.0806	0	23642	70.6896	0	52315	156.422	0	40705	121.708	3.354e-15							6889	20.5981	0				26371	78.8493	0
15456	46.2134	0							41207	123.209	0				33592	100.44	0	25489	76.2121	0	23647	70.7045	0	52332	156.473	1.228e-15	40706	121.711	0							6892	20.6071	5.159e-16				26392	78.9121	0
15475	46.2702	0							41264	123.379	0				33636	100.572	0	25522	76.3108	0	23696	70.851	0	52473	156.894	0	40724	121.765	0							6896	20.619	4.504e-16				26442	79.0616	0
15478	46.2792	0							41271	123.4	0				33864	101.253	0	25533	76.3437	0	23752	71.0185	0	52564	157.166	7.147e-15	40753	121.852	0							6900	20.631	1.875e-15				26446	79.0735	0
15515	46.3899	0							41285	123.442	0				33875	101.286	0	25570	76.4543	0	23756	71.0304	0	52580	157.214	4.168e-16	40779	121.929	0							6901	20.634	0				26482	79.1812	0
15563	46.5334	0							41470	123.995	0				33906	101.379	0	25641	76.6666	0	23772	71.0783	0	52598	157.268	1.173e-15	40879	122.228	0							6909	20.6579	0				26552	79.3905	0
15595	46.629	0							41499	124.082	0				33917	101.412	0	25650	76.6935	0	23800	71.162	0	52806	157.89	0	40952	122.447	0							6912	20.6669	9.458e-16				26560	79.4144	0
15596	46.632	0							41618	124.438	0				33957	101.531	0	25744	76.9746	0	23815	71.2069	0	52815	157.917	2.86e-15	40957	122.461	0							6913	20.6699	0				26615	79.5789	6.339e-16
15620	46.7038	0							41636	124.492	0				33961	101.543	0	25772	77.0583	0	23835	71.2666	3.025e-15	52822	157.938	3.864e-15	41063	122.778	0							6916	20.6788	0				26650	79.6835	0
15642	46.7696	0							41987	125.541	0				33964	101.552	0	25784	77.0942	0	23843	71.2906	0	52825	157.947	0	41111	122.922	4.986e-16							6919	20.6878	4.51e-16				26696	79.821	0
15659	46.8204	0							41993	125.559	0				34034	101.762	0	25792	77.1181	0	23880	71.4012	0	52915	158.216	0	41127	122.97	0							6929	20.7177	5.341e-16				26763	80.0214	0
15722	47.0088	0							42037	125.691	0				34080	101.899	0	25847	77.2825	0	23897	71.452	7.004e-16	52963	158.359	1.789e-15	41129	122.976	0							6931	20.7237	4.154e-16				26766	80.0303	0
15729	47.0297	0							42143	126.008	0				34201	102.261	0	25850	77.2915	0	23905	71.4759	0	53046	158.607	0	41136	122.997	0							6935	20.7356	5.079e-16				26812	80.1679	0
15731	47.0357	0							42190	126.148	0				34210	102.288	0	25948	77.5845	0	24011	71.7929	0	53047	158.611	0	41155	123.053	0							6941	20.7536	0				26838	80.2456	0
15735	47.0476	0							42223	126.247	0				34220	102.318	0	25952	77.5965	0	24025	71.8347	0	53115	158.814	0	41191	123.161	6.012e-16							6943	20.7596	0				26954	80.5925	0
15749	47.0895	0							42276	126.405	0				34254	102.419	0	25963	77.6294	0	24037	71.8706	0	53295	159.352	4.07e-16	41219	123.245	0							6960	20.8104	0				26971	80.6433	0
15782	47.1882	0							42299	126.474	0				34328	102.641	0	26013	77.7789	0	24043	71.8886	0	53485	159.92	0	41293	123.466	6.533e-16							6963	20.8194	0				27003	80.739	0
15794	47.2241	0							42343	126.606	0				34425	102.931	0	26019	77.7968	0	24049	71.9065	0	53582	160.21	0	41322	123.553	0							6968	20.8343	0				27021	80.7928	0
15795	47.227	0							42346	126.615	0				34455	103.02	0	26053	77.8985	0	24060	71.9394	0	53665	160.458	0	41528	124.169	0							6975	20.8553	0				27032	80.8257	0
15799	47.239	0							42373	126.695	0				34464	103.047	0	26069	77.9463	0	24241	72.4806	5.559e-16	53686	160.521	0	41573	124.303	9.947e-16							6976	20.8582	3.821e-16				27062	80.9154	0
15811	47.2749	0							42389	126.743	0				34466	103.053	0	26074	77.9613	0	24269	72.5643	0	53846	161	0	41637	124.495	0							7010	20.9599	7.521e-15				27101	81.032	0
15840	47.3616	0							42414	126.818	0				34531	103.248	0	26090	78.0091	0	24343	72.7856	0	53917	161.212	0	41684	124.635	0							7011	20.9629	0				27166	81.2263	0
15849	47.3885	0							42535	127.18	0				34605	103.469	0	26112	78.0749	0	24440	73.0756	5.105e-16	54047	161.601	0	41686	124.641	0							7020	20.9898	0				27175	81.2532	0
15862	47.4274	0							42589	127.341	0				34623	103.523	0	26142	78.1646	0	24450	73.1055	0	54124	161.831	9.487e-16	41694	124.665	0							7032	21.0257	4.234e-16				27180	81.2682	0
15870	47.4513	0							42625	127.449	0				34682	103.699	0	26160	78.2184	0	24660	73.7334	0	54158	161.932	0	41709	124.71	0							7036	21.0376	0				27235	81.4326	0
15874	47.4633	0							42717	127.724	0				34757	103.923	0	26164	78.2304	0	24691	73.8261	0	54206	162.076	0	41714	124.725	0							7039	21.0466	0				27289	81.5941	0
15915	47.5859	0							42892	128.247	0				34916	104.399	0	26222	78.4038	0	24783	74.1012	8.896e-16	54212	162.094	4.718e-16	41741	124.806	4.831e-16							7043	21.0586	0				27335	81.7317	0
15919	47.5978	0							42921	128.334	0				34945	104.486	0	26232	78.4337	0	24840	74.2716	0	54532	163.051	0	41744	124.815	0							7050	21.0795	2.032e-15				27342	81.7526	0
15924	47.6128	0							43187	129.129	0				35049	104.796	0	26259	78.5144	0	24874	74.3733	0	54542	163.081	6.85e-16	41761	124.865	0							7052	21.0855	1.085e-15				27354	81.7885	0
15933	47.6397	0							43419	129.823	0				35092	104.925	0	26294	78.6191	0	24882	74.3972	0	54639	163.371	0	41773	124.901	4.66e-16							7058	21.1034	1.183e-15				27387	81.8871	0
15952	47.6965	0							43422	129.832	0				35101	104.952	0	26372	78.8523	0	24904	74.463	1.249e-14	54649	163.4	0	41795	124.967	0							7064	21.1214	0				27399	81.923	0
15987	47.8011	0							43702	130.669	0				35103	104.958	0	26386	78.8941	0	24915	74.4959	0	54694	163.535	0	41849	125.129	0							7073	21.1483	0				27427	82.0067	0
16001	47.843	0							43743	130.792	0				35121	105.012	0	26389	78.9031	0	24923	74.5198	0	54769	163.759	0	41908	125.305	0							7079	21.1662	4.658e-15				27445	82.0606	0
16072	48.0553	0							43746	130.8	0				35237	105.359	0	26451	79.0885	0	24946	74.5885	0	54861	164.034	0	41920	125.341	0							7113	21.2679	0				27464	82.1174	0
16077	48.0702	0							43773	130.881	0				35477	106.076	0	26507	79.2559	6.327e-16	24993	74.7291	0	54870	164.061	3.44e-15	41945	125.415	2.126e-15							7123	21.2978	1.002e-15				27513	82.2639	0
16080	48.0792	0							43789	130.929	0				35478	106.079	0	26525	79.3097	0	25021	74.8128	0	54880	164.091	0	42105	125.894	8.751e-16							7139	21.3456	0				27542	82.3506	0
16096	48.127	0							43792	130.938	0				35551	106.297	0	26531	79.3277	0	25101	75.052	0	54933	164.25	0	42152	126.034	0							7140	21.3486	1.04e-15				27663	82.7124	0
16140	48.2586	0							43817	131.013	0				35567	106.345	0	26620	79.5938	0	25108	75.0729	5.62e-16	55023	164.519	3.857e-16	42285	126.432	0							7147	21.3695	3.706e-16				27685	82.7781	0
16196	48.426	0							43856	131.129	0				35764	106.934	0	26651	79.6865	1.922e-15	25126	75.1267	0	55046	164.588	0	42341	126.6	0							7150	21.3785	0				27715	82.8679	0
16205	48.453	0							43875	131.186	0				35816	107.09	0	26661	79.7164	0	25151	75.2015	0	55227	165.129	5.397e-16	42382	126.722	0							7152	21.3845	0				27723	82.8918	0
16259	48.6144	0							43893	131.24	0				35851	107.195	0	26665	79.7284	0	25153	75.2075	0	55289	165.314	0	42384	126.728	0							7160	21.4084	0				27796	83.11	0
16270	48.6473	0							43977	131.491	0				35864	107.233	0	26725	79.9078	0	25170	75.2583	0	55324	165.419	0	42480	127.015	0							7178	21.4622	1.192e-15				27823	83.1908	0
16276	48.6652	0							43997	131.551	0				35873	107.26	0	26733	79.9317	0	25175	75.2733	0	55325	165.422	1.348e-15	42579	127.311	0							7185	21.4832	0				27839	83.2386	0
16296	48.725	0							44000	131.56	0				35895	107.326	0	26808	80.1559	0	25187	75.3091	0	55345	165.482	0	42587	127.335	8.452e-15							7192	21.5041	0				27851	83.2745	0
16311	48.7699	0							44014	131.602	0				35963	107.529	0	26822	80.1978	0	25203	75.357	0	55364	165.538	0	42628	127.458	0							7194	21.5101	1.781e-15				27854	83.2835	0
16347	48.8775	0							44034	131.662	0				36007	107.661	0	26844	80.2636	0	25232	75.4437	0	55433	165.745	0	42745	127.808	0							7198	21.522	3.639e-15				27864	83.3134	0
16364	48.9284	0							44041	131.683	0				36092	107.915	0	26863	80.3204	0	25323	75.7158	1.995e-15	55485	165.9	0	42792	127.948	5.117e-15							7200	21.528	4.002e-15				27919	83.4778	0
16369	48.9433	0							44131	131.952	0				36124	108.011	0	26877	80.3622	0	25332	75.7427	0	55515	165.99	0	42820	128.032	0							7210	21.5579	8.499e-16				27955	83.5854	0
16500	49.335	0							44157	132.029	0				36140	108.059	0	26918	80.4848	0	25345	75.7815	0	55624	166.316	0	42869	128.178	0							7219	21.5848	0				27972	83.6363	0
16503	49.344	0							44165	132.053	0				36228	108.322	0	27026	80.8077	0	25371	75.8593	0	55641	166.367	0	42901	128.274	0							7233	21.6267	0				27981	83.6632	0
16521	49.3978	0							44179	132.095	0				36232	108.334	0	27032	80.8257	0	25408	75.9699	0	55780	166.782	0	42906	128.289	0							7243	21.6566	5.713e-15				27983	83.6692	0
16531	49.4277	0							44185	132.113	0				36311	108.57	0	27088	80.9931	0	25414	75.9879	9.831e-16	56069	167.646	0	42995	128.555	0							7249	21.6745	0				28030	83.8097	0
16555	49.4995	0							44235	132.263	0				36315	108.582	0	27095	81.014	0	25430	76.0357	0	56247	168.179	8.092e-16	43031	128.663	6.541e-16							7273	21.7463	0				28119	84.0758	0
16569	49.5413	0							44244	132.29	0				36329	108.624	0	27167	81.2293	0	25437	76.0566	0	56302	168.343	0	43128	128.953	0							7294	21.8091	0				28129	84.1057	0
16596	49.622	0							44288	132.421	0				36444	108.968	0	27176	81.2562	0	25458	76.1194	0	56382	168.582	0	43169	129.075	0							7296	21.815	1.648e-15				28133	84.1177	0
16606	49.6519	0							44310	132.487	0				36563	109.323	0	27251	81.4805	0	25476	76.1732	0	56416	168.684	0	43258	129.341	0							7303	21.836	6.468e-16				28226	84.3957	0
16617	49.6848	0							44320	132.517	0				36606	109.452	0	27257	81.4984	0	25484	76.1972	0	56489	168.902	0	43277	129.398	0							7315	21.8719	0				28266	84.5153	0
16625	49.7088	0							44540	133.175	0				36624	109.506	0	27278	81.5612	6.69e-16	25497	76.236	0	56583	169.183	0	43347	129.607	0							7340	21.9466	6.39e-16				28280	84.5572	0
16639	49.7506	0							44584	133.306	0				36663	109.622	0	27321	81.6898	0	25509	76.2719	2.184e-15	56586	169.192	0	43384	129.718	1.109e-15							7353	21.9855	8.071e-15				28304	84.629	0
16658	49.8074	0							44592	133.33	0				36664	109.625	0	27336	81.7346	0	25512	76.2809	0	56596	169.222	0	43426	129.844	0							7367	22.0273	9.431e-16				28358	84.7904	0
16660	49.8134	0							44597	133.345	0				36676	109.661	0	27366	81.8243	0	25528	76.3287	0	56624	169.306	0	43519	130.122	0							7371	22.0393	0				28407	84.9369	0
16663	49.8224	0							44608	133.378	0				36701	109.736	0	27379	81.8632	0	25565	76.4394	7.053e-16	56674	169.455	0	43569	130.271	0							7374	22.0483	1.308e-15				28439	85.0326	0
16673	49.8523	0							44631	133.447	0				36767	109.933	0	27389	81.8931	0	25573	76.4633	0	56762	169.718	5.25e-16	43614	130.406	0							7378	22.0602	0				28470	85.1253	0
16697	49.924	0							44704	133.665	0				36970	110.54	0	27409	81.9529	0	25583	76.4932	0	56787	169.793	0	43616	130.412	0							7392	22.1021	3.744e-15				28484	85.1672	0
16724	50.0048	0							44742	133.779	0				36990	110.6	0	27472	82.1413	0	25593	76.5231	0	56816	169.88	0	43639	130.481	0							7397	22.117	9.165e-16				28494	85.1971	0
16730	50.0227	0							44768	133.856	0				37077	110.86	0	27513	82.2639	0	25596	76.532	0	56879	170.068	0	43649	130.511	0							7400	22.126	0				28513	85.2539	0
16737	50.0436	0							44786	133.91	0				37117	110.98	0	27518	82.2788	0	25600	76.544	4.873e-16	56907	170.152	4.466e-15	43825	131.037	0							7409	22.1529	0				28539	85.3316	0
16742	50.0586	0							44849	134.099	0				37150	111.079	0	27565	82.4193	7.776e-16	25621	76.6068	0	56908	170.155	0	43868	131.165	0							7432	22.2217	1.452e-15				28568	85.4183	0
16784	50.1842	0							44895	134.236	0				37191	111.201	0	27582	82.4702	0	25625	76.6188	0	57035	170.535	0	43914	131.303	0							7448	22.2695	0				28583	85.4632	0
16789	50.1991	0							44916	134.299	0				37193	111.207	0	27624	82.5958	0	25636	76.6516	0	57086	170.687	0	43991	131.533	0							7451	22.2785	0				28608	85.5379	0
16793	50.2111	0							44920	134.311	0				37264	111.419	0	27646	82.6615	0	25652	76.6995	0	57193	171.007	0	43997	131.551	0							7453	22.2845	0				28611	85.5469	0
16795	50.2171	0							44933	134.35	0				37376	111.754	0	27654	82.6855	0	25690	76.8131	0	57263	171.216	0	44032	131.656	0							7465	22.3204	5.567e-15				28623	85.5828	0
16838	50.3456	0							44935	134.356	0				37393	111.805	0	27713	82.8619	0	25697	76.834	0	57278	171.261	0	44034	131.662	0							7473	22.3443	4.746e-16				28651	85.6665	0
16847	50.3725	0							44968	134.454	0				37432	111.922	0	27735	82.9276	0	25703	76.852	0	57301	171.33	1.19e-15	44071	131.772	0							7486	22.3831	0				28677	85.7442	0
16884	50.4832	0							45031	134.643	0				37488	112.089	0	27791	83.0951	0	25741	76.9656	1.265e-14	57336	171.435	0	44092	131.835	0							7495	22.4101	0				28711	85.8459	0
16948	50.6745	0							45046	134.688	0				37539	112.242	0	27838	83.2356	0	25746	76.9805	0	57579	172.161	0	44119	131.916	0							7497	22.416	0				28727	85.8937	4.789e-16
16949	50.6775	0							45058	134.723	0				37566	112.322	0	27875	83.3462	0	25751	76.9955	0	57674	172.445	0	44175	132.083	0							7503	22.434	0				28736	85.9206	0
16968	50.7343	0							45124	134.921	0				37569	112.331	0	27922	83.4868	0	25760	77.0224	0	57755	172.688	0	44187	132.119	0							7511	22.4579	0				28764	86.0044	0
16969	50.7373	0							45140	134.969	0				37573	112.343	0	27979	83.6572	0	25767	77.0433	0	57897	173.112	0	44196	132.146	0							7516	22.4728	3.646e-16				28767	86.0133	0
16984	50.7822	0							45313	135.486	0				37680	112.663	0	28024	83.7918	0	25773	77.0613	5.196e-15	57991	173.393	0	44247	132.298	0							7530	22.5147	0				28774	86.0343	0
17003	50.839	0							45324	135.519	0				37687	112.684	0	28101	84.022	0	25774	77.0643	0	58069	173.626	0	44352	132.613	5.773e-14							7544	22.5566	0				28802	86.118	0
17006	50.8479	0							45345	135.582	0				37690	112.693	0	28134	84.1207	0	25790	77.1121	0	58111	173.752	0	44398	132.75	0							7547	22.5655	9.156e-15				28822	86.1778	0
17036	50.9376	0							45403	135.755	0				37714	112.765	0	28180	84.2582	0	25799	77.139	0	58321	174.38	0	44518	133.109	0							7554	22.5865	0				28868	86.3153	0
17040	50.9496	0							45478	135.979	0				37776	112.95	0	28184	84.2702	0	25880	77.3812	0	58416	174.664	1.357e-15	44536	133.163	0							7561	22.6074	4.537e-16				28917	86.4618	0
17052	50.9855	0							45501	136.048	0				37780	112.962	0	28228	84.4017	0	25883	77.3902	0	58417	174.667	0	44600	133.354	0							7582	22.6702	2.772e-15				28928	86.4947	0
17100	51.129	0							45505	136.06	0				37798	113.016	0	28232	84.4137	0	25913	77.4799	3.943e-15	58475	174.84	0	44601	133.357	0							7587	22.6851	0				28936	86.5186	0
17124	51.2008	0							45546	136.183	0				37836	113.13	0	28251	84.4705	0	25931	77.5337	0	58527	174.996	0	44696	133.641	0							7590	22.6941	0				28949	86.5575	0
17127	51.2097	0							45549	136.191	9.713e-16				37957	113.491	0	28257	84.4884	0	25932	77.5367	3.099e-15	58598	175.208	0	44718	133.707	0							7597	22.715	0				28970	86.6203	0
17146	51.2665	0							45551	136.197	0				37971	113.533	0	28265	84.5123	0	25977	77.6712	0	58627	175.295	5.329e-16	44778	133.886	0							7600	22.724	8.822e-16				29018	86.7638	0
17194	51.4101	0							45554	136.207	0				38015	113.665	0	28313	84.6559	0	26008	77.7639	0	58778	175.746	0	44785	133.907	0							7625	22.7988	1.022e-15				29041	86.8326	0
17242	51.5536	0							45558	136.218	0				38025	113.695	0	28325	84.6917	0	26063	77.9284	6.269e-16	58929	176.198	0	44812	133.988	0							7628	22.8077	0				29102	87.015	0
17301	51.73	0							45567	136.245	0				38066	113.817	0	28399	84.913	4.77e-16	26091	78.0121	0	59040	176.53	0	44875	134.176	0							7631	22.8167	2.008e-15				29214	87.3499	0
17405	52.041	0							45585	136.299	0				38115	113.964	0	28402	84.922	0	26095	78.0241	0	59085	176.664	0	44901	134.254	0							7643	22.8526	5.375e-16				29250	87.4575	0
17446	52.1635	0							45592	136.32	0				38143	114.048	0	28426	84.9937	0	26120	78.0988	1.45e-15	59150	176.858	0	44909	134.278	0							7668	22.9273	9.35e-16				29304	87.619	0
17451	52.1785	0							45608	136.368	0				38153	114.078	0	28457	85.0864	0	26158	78.2124	0	59268	177.211	0	44921	134.314	0							7670	22.9333	2.362e-15				29336	87.7146	0
17455	52.1904	0							45619	136.401	0				38217	114.269	0	28474	85.1373	0	26160	78.2184	0	59279	177.244	0	44935	134.356	1.035e-15							7677	22.9542	0				29345	87.7416	0
17459	52.2024	0							45637	136.455	0				38283	114.466	0	28480	85.1552	0	26167	78.2393	0	59357	177.477	2.203e-15	45092	134.825	0							7682	22.9692	1.394e-15				29354	87.7685	0
17501	52.328	0							45741	136.766	0				38351	114.669	0	28500	85.215	0	26173	78.2573	1.827e-15	59404	177.618	0	45174	135.07	0							7690	22.9931	0				29371	87.8193	0
17517	52.3758	0							45785	136.897	0				38450	114.966	0	28554	85.3765	0	26249	78.4845	0	59415	177.651	0	45202	135.154	0							7696	23.011	0				29381	87.8492	0
17552	52.4805	0							45804	136.954	0				38496	115.103	0	28616	85.5618	1.106e-14	26300	78.637	0	59467	177.806	0	45274	135.369	0							7704	23.035	0				29418	87.9598	0
17576	52.5522	0							45887	137.202	0				38500	115.115	0	28619	85.5708	0	26317	78.6878	0	59513	177.944	0	45433	135.845	0							7707	23.0439	7.053e-16				29452	88.0615	0
17588	52.5881	0							45915	137.286	0				38550	115.264	0	28631	85.6067	0	26323	78.7058	0	59533	178.004	0	45467	135.946	0							7719	23.0798	0				29562	88.3904	0
17594	52.6061	0							45930	137.331	0				38568	115.318	0	28671	85.7263	0	26326	78.7147	2.497e-15	59575	178.129	3.701e-16	45481	135.988	0							7721	23.0858	5.045e-16				29619	88.5608	0
17596	52.612	0							45939	137.358	0				38628	115.498	0	28755	85.9775	0	26334	78.7387	0	59583	178.153	0	45482	135.991	0							7728	23.1067	0				29648	88.6475	0
17622	52.6898	0							45993	137.519	0				38639	115.531	0	28780	86.0522	0	26336	78.7446	0	59656	178.371	5.578e-16	45496	136.033	0							7732	23.1187	0				29658	88.6774	0
17624	52.6958	0							46046	137.678	0				38700	115.713	0	28807	86.1329	0	26362	78.8224	0	59978	179.334	0	45499	136.042	0							7741	23.1456	3.938e-16				29710	88.8329	0
17627	52.7047	0							46061	137.722	0				38770	115.922	0	28820	86.1718	0	26392	78.9121	0	59981	179.343	0	45507	136.066	0							7753	23.1815	0				29745	88.9376	0
17665	52.8184	0							46076	137.767	0				38927	116.392	0	28831	86.2047	0	26418	78.9898	0	60158	179.872	0	45521	136.108	0							7760	23.2024	0				29778	89.0362	0
17677	52.8542	0							46124	137.911	0				39002	116.616	0	28832	86.2077	0	26421	78.9988	0	60207	180.019	0	45590	136.314	0							7780	23.2622	1.879e-15				29822	89.1678	0
17683	52.8722	0							46140	137.959	0				39013	116.649	0	28857	86.2824	0	26443	79.0646	0	60277	180.228	0	45758	136.816	0							7789	23.2891	1.221e-15				29826	89.1797	0
17685	52.8781	0							46150	137.988	0				39090	116.879	0	28954	86.5725	0	26468	79.1393	0	60312	180.333	0	45760	136.822	0							7798	23.316	0				29867	89.3023	0
17701	52.926	0							46234	138.24	0				39133	117.008	0	28971	86.6233	0	26531	79.3277	0				45764	136.834	0							7822	23.3878	2.026e-15				29900	89.401	0
17710	52.9529	0							46331	138.53	0				39195	117.193	0	29002	86.716	0	26555	79.3995	0				45796	136.93	0							7823	23.3908	0				29904	89.413	0
17750	53.0725	0							46537	139.146	0				39295	117.492	0	29017	86.7608	0	26574	79.4563	0				45812	136.978	1.175e-15							7826	23.3997	4.578e-16				29928	89.4847	0
17755	53.0875	0							46576	139.262	0				39320	117.567	0	29024	86.7818	0	26577	79.4652	0				45882	137.187	0							7835	23.4266	0				30000	89.7	0
17766	53.1203	0							46610	139.364	0				39370	117.716	0	29041	86.8326	0	26672	79.7493	1.259e-15				45936	137.349	0							7853	23.4805	0				30004	89.712	9.471e-15
17771	53.1353	0							46626	139.412	0				39396	117.794	0	29052	86.8655	0	26733	79.9317	0				45985	137.495	0							7855	23.4865	0				30031	89.7927	0
17779	53.1592	0							46973	140.449	0				39500	118.105	0	29080	86.9492	0	26767	80.0333	0				45992	137.516	0							7878	23.5552	3.969e-16				30085	89.9541	0
17785	53.1771	0							46994	140.512	0				39506	118.123	0	29118	87.0628	0	26786	80.0901	0				46051	137.692	2.884e-15							7894	23.6031	4.682e-16				30092	89.9751	0
17794	53.2041	0							47012	140.566	0				39574	118.326	0	29121	87.0718	0	26806	80.1499	0				46260	138.317	2.742e-15							7907	23.6419	1.931e-15				30093	89.9781	0
17814	53.2639	0							47113	140.868	0				39736	118.811	0	29125	87.0837	0	26902	80.437	4.029e-16				46391	138.709	0							7909	23.6479	4.739e-16				30122	90.0648	0
17831	53.3147	0							47155	140.993	0				39739	118.82	0	29144	87.1406	0	26918	80.4848	0				46409	138.763	0							7928	23.7047	5.718e-16				30173	90.2173	0
17839	53.3386	0							47200	141.128	0				39847	119.142	0	29157	87.1794	0	26930	80.5207	0				46451	138.888	0							7935	23.7257	0				30345	90.7315	0
17879	53.4582	0							47225	141.203	0				39858	119.175	0	29199	87.305	0	27012	80.7659	0				46495	139.02	0							7940	23.7406	0				30367	90.7973	0
17885	53.4762	0							47237	141.239	0				39904	119.313	0	29242	87.4336	0	27015	80.7749	0				46533	139.134	0							7948	23.7645	0				30371	90.8093	0
17888	53.4851	0							47319	141.484	0				39976	119.528	0	29296	87.595	0	27036	80.8376	0				46585	139.289	2.016e-15							7949	23.7675	9.131e-16				30421	90.9588	0
17910	53.5509	0							47326	141.505	0				39984	119.552	0	29328	87.6907	0	27062	80.9154	0				46611	139.367	0							7959	23.7974	6.851e-16				30465	91.0904	0
17931	53.6137	0							47354	141.589	0				40017	119.651	0	29381	87.8492	0	27150	81.1785	0				46691	139.606	0							7961	23.8034	0				30498	91.189	0
17946	53.6585	0							47358	141.6	0				40020	119.66	0	29456	88.0734	0	27252	81.4835	3.423e-15				46750	139.782	0							7978	23.8542	0				30596	91.482	0
17964	53.7124	0							47361	141.609	0				40028	119.684	0	29464	88.0974	2.246e-14	27262	81.5134	0				46822	139.998	0							7984	23.8722	1.164e-15				30641	91.6166	0
17995	53.8051	0							47364	141.618	0				40052	119.755	0	29543	88.3336	0	27268	81.5313	0				46825	140.007	0							8023	23.9888	0				30649	91.6405	0
17997	53.811	0							47375	141.651	0				40062	119.785	0	29606	88.5219	0	27289	81.5941	0				46930	140.321	0							8059	24.0964	7.119e-15				30676	91.7212	0
18054	53.9815	0							47499	142.022	0				40135	120.004	0	29679	88.7402	0	27329	81.7137	0				46984	140.482	0							8106	24.2369	1.626e-15				30693	91.7721	0
18080	54.0592	0							47675	142.548	0				40172	120.114	0	29772	89.0183	0	27390	81.8961	0				47041	140.653	0							8115	24.2639	4.142e-16				30714	91.8349	0
18083	54.0682	0							47784	142.874	0				40192	120.174	0	29777	89.0332	0	27393	81.9051	0				47120	140.889	0							8119	24.2758	0				30758	91.9664	0
18151	54.2715	0							47893	143.2	0				40266	120.395	0	29837	89.2126	0	27442	82.0516	6.828e-16				47130	140.919	0							8126	24.2967	0				30793	92.0711	0
18190	54.3881	0							47952	143.376	0				40280	120.437	0	29857	89.2724	0	27453	82.0845	0				47144	140.961	0							8133	24.3177	0				30848	92.2355	0
18191	54.3911	0							47957	143.391	0				40289	120.464	0	29923	89.4698	0	27455	82.0905	0				47157	140.999	0							8138	24.3326	5.988e-15				30867	92.2923	0
18201	54.421	0							47973	143.439	0				40312	120.533	0	29947	89.5415	0	27473	82.1443	0				47176	141.056	0							8139	24.3356	0				30875	92.3162	0
18216	54.4658	0							47994	143.502	0				40371	120.709	0	29993	89.6791	0	27476	82.1532	0				47179	141.065	0							8140	24.3386	0				30880	92.3312	0
18258	54.5914	0							48106	143.837	0				40441	120.919	0	30051	89.8525	0	27481	82.1682	9.562e-16				47215	141.173	0							8149	24.3655	5.757e-15				30908	92.4149	0
18262	54.6034	0							48404	144.728	0				40478	121.029	0	30066	89.8973	0	27482	82.1712	0				47225	141.203	0							8156	24.3864	7.028e-16				30985	92.6452	0
18295	54.702	0							48558	145.188	0				40623	121.463	0	30143	90.1276	0	27500	82.225	0				47271	141.34	0							8163	24.4074	0				30989	92.6571	0
18313	54.7559	0							48594	145.296	0				40635	121.499	0	30200	90.298	0	27528	82.3087	0				47360	141.606	0							8167	24.4193	0				31002	92.696	0
18338	54.8306	0							48711	145.646	0				40651	121.546	0	30222	90.3638	0	27547	82.3655	0				47437	141.837	1.746e-15							8168	24.4223	7.588e-16				31050	92.8395	0
18344	54.8486	0							48752	145.768	0				40686	121.651	0	30270	90.5073	4.999e-16	27559	82.4014	0				47438	141.84	0							8178	24.4522	0				31052	92.8455	0
18400	55.016	0							48770	145.822	0				40731	121.786	0	30321	90.6598	0	27576	82.4522	0				47447	141.867	0							8190	24.4881	0				31134	93.0907	0
18414	55.0579	0							48867	146.112	0				40780	121.932	0	30333	90.6957	0	27580	82.4642	4.516e-15				47475	141.95	0							8194	24.5001	0				31210	93.3179	0
18421	55.0788	0							48921	146.274	0				40829	122.079	0	30418	90.9498	0	27586	82.4821	0				47493	142.004	0							8196	24.506	4.32e-16				31220	93.3478	0
18423	55.0848	0							48991	146.483	0				40874	122.213	0	30447	91.0365	0	27776	83.0502	0				47635	142.429	0							8201	24.521	5.128e-16				31224	93.3598	0
18439	55.1326	0							49036	146.618	0				40930	122.381	0	30453	91.0545	0	27805	83.1369	0				47676	142.551	0							8211	24.5509	0				31297	93.578	0
18451	55.1685	0							49342	147.533	0				41109	122.916	0	30472	91.1113	0	27905	83.436	0				47735	142.728	0							8220	24.5778	4.25e-16				31343	93.7156	0
18457	55.1864	0							49436	147.814	0				41175	123.113	0	30513	91.2339	0	27976	83.6482	0				47736	142.731	0							8224	24.5898	4.946e-16				31364	93.7784	0
18460	55.1954	0							49494	147.987	0				41218	123.242	0	30538	91.3086	0	28005	83.7349	0				47754	142.785	0							8234	24.6197	4.206e-16				31378	93.8202	0
18497	55.306	0							49548	148.149	0				41244	123.32	0	30549	91.3415	0	28008	83.7439	0				47808	142.946	0							8241	24.6406	4.909e-15				31399	93.883	0
18498	55.309	0							50035	149.605	0				41311	123.52	0	30562	91.3804	0	28135	84.1236	0				47813	142.961	0							8252	24.6735	0				31592	94.4601	0
18503	55.324	0							50153	149.958	0				41342	123.613	0	30630	91.5837	0	28210	84.3479	0				47838	143.036	0							8254	24.6795	0				31627	94.5647	0
18505	55.33	0							50393	150.675	0				41347	123.627	0	30705	91.808	0	28258	84.4914	0				47887	143.182	0							8256	24.6854	8.05e-16				31628	94.5677	0
18518	55.3688	0							50540	151.115	0				41372	123.702	0	30712	91.8289	0	28303	84.626	0				48012	143.556	0							8272	24.7333	1.522e-15				31715	94.8278	0
18519	55.3718	0							50544	151.127	0				41380	123.726	0	30753	91.9515	0	28366	84.8143	0				48035	143.625	0							8306	24.8349	4.764e-16				31741	94.9056	0
18573	55.5333	0							50620	151.354	0				41476	124.013	0	30832	92.1877	1.04e-15	28370	84.8263	0				48184	144.07	0							8309	24.8439	5.629e-16				31801	95.085	0
18606	55.6319	0							50646	151.431	0				41533	124.184	0	30871	92.3043	0	28407	84.9369	2.246e-15				48244	144.25	0							8321	24.8798	0				31806	95.0999	0
18610	55.6439	0							50736	151.701	0				41536	124.193	0	30974	92.6123	0	28412	84.9519	0				48250	144.268	0							8335	24.9216	1.972e-14				31808	95.1059	0
18628	55.6977	0							50827	151.973	0				41623	124.453	0	30976	92.6182	0	28445	85.0506	1.66e-15				48296	144.405	0							8336	24.9246	0				31812	95.1179	0
18632	55.7097	0							50850	152.042	0				41652	124.54	0	31020	92.7498	0	28451	85.0685	0				48341	144.54	0							8350	24.9665	0				31821	95.1448	0
18638	55.7276	0							51053	152.649	0				41666	124.581	0	31039	92.8066	0	28476	85.1432	0				48370	144.626	1.704e-15							8358	24.9904	7.916e-16				31830	95.1717	6.557e-16
18665	55.8083	0							51456	153.853	0				41667	124.584	0	31075	92.9142	0	28495	85.2001	3.89e-16				48507	145.036	0							8361	24.9994	0				31841	95.2046	0
18685	55.8681	0							51481	153.928	0				41765	124.877	0	31086	92.9471	0	28502	85.221	0				48538	145.129	0							8373	25.0353	3.698e-16				31846	95.2195	0
18709	55.9399	0							51665	154.478	0				41785	124.937	0	31116	93.0368	0	28511	85.2479	2.063e-15				48718	145.667	0							8401	25.119	5.494e-16				31849	95.2285	0
18714	55.9549	0							51761	154.765	0				41823	125.051	0	31149	93.1355	0	28565	85.4094	0				48745	145.748	0							8405	25.1309	8.017e-16				31853	95.2405	0
18723	55.9818	0							51768	154.786	0				41855	125.147	0	31150	93.1385	0	28583	85.4632	0				48796	145.9	0							8409	25.1429	0				31860	95.2614	0
18727	55.9937	0							51774	154.804	0				41948	125.424	2.233e-15	31163	93.1774	0	28632	85.6097	0				48804	145.924	0							8413	25.1549	0				31867	95.2823	0
18774	56.1343	0							51871	155.094	0				41961	125.463	0	31189	93.2551	0	28635	85.6187	0				48809	145.939	0							8416	25.1638	0				31878	95.3152	0
18788	56.1761	4.377e-15							51918	155.235	0				42037	125.691	0	31192	93.2641	0	28696	85.801	0				48871	146.124	0							8420	25.1758	5.874e-16				31880	95.3212	0
18791	56.1851	0							51974	155.402	0				42198	126.172	0	31226	93.3657	0	28765	86.0074	0				48903	146.22	0							8425	25.1908	0				31883	95.3302	0
18804	56.224	0							51992	155.456	0				42206	126.196	0	31227	93.3687	0	28797	86.103	0				49004	146.522	0							8434	25.2177	0				31891	95.3541	0
18818	56.2658	0							52000	155.48	0				42255	126.342	0	31299	93.584	0	28802	86.118	0				49079	146.746	0							8439	25.2326	4.499e-16				31899	95.378	0
18824	56.2838	0							52168	155.982	0				42270	126.387	0	31322	93.6528	0	28815	86.1569	0				49099	146.806	0							8443	25.2446	0				31913	95.4199	0
18864	56.4034	0							52334	156.479	0				42417	126.827	0	31326	93.6647	0	28825	86.1868	1.151e-15				49112	146.845	0							8445	25.2506	0				31914	95.4229	0
18868	56.4153	0							52380	156.616	0				42470	126.985	0	31349	93.7335	0	28965	86.6054	0				49146	146.946	0							8452	25.2715	0				31915	95.4258	0
18882	56.4572	0							52538	157.089	0				42497	127.066	0	31363	93.7754	0	28984	86.6622	8.152e-16				49226	147.186	0							8457	25.2864	6.379e-16				31926	95.4587	0
18950	56.6605	0							52564	157.166	0				42505	127.09	0	31379	93.8232	0	29008	86.7339	4.694e-16				49348	147.55	7.728e-16							8474	25.3373	6.621e-16				31931	95.4737	0
18953	56.6695	0							52820	157.932	0				42507	127.096	0	31397	93.877	0	29032	86.8057	0				49359	147.583	0							8476	25.3432	7.361e-16				31932	95.4767	0
18969	56.7173	0							52839	157.989	0				42509	127.102	0	31433	93.9847	0	29128	87.0927	0				49405	147.721	4.755e-16							8479	25.3522	7.497e-15				31947	95.5215	0
18975	56.7353	0							52856	158.039	0				42512	127.111	0	31436	93.9936	0	29132	87.1047	0				49474	147.927	0							8486	25.3731	2.952e-15				31966	95.5783	0
18990	56.7801	0							52864	158.063	0				42530	127.165	0	31515	94.2298	0	29147	87.1495	0				49500	148.005	0							8488	25.3791	0				31974	95.6023	0
18998	56.804	0							52896	158.159	0				42586	127.332	0	31567	94.3853	0	29159	87.1854	0				49510	148.035	0							8492	25.3911	0				31997	95.671	0
19014	56.8519	0							52900	158.171	0				42712	127.709	0	31595	94.469	0	29197	87.299	0				49635	148.409	0							8504	25.427	0				32006	95.6979	0
19027	56.8907	0							52938	158.285	0				42715	127.718	0	31615	94.5289	0	29201	87.311	0				49636	148.412	0							8509	25.4419	0				32024	95.7518	0
19035	56.9147	0							52949	158.317	0				42820	128.032	0	31669	94.6903	0	29210	87.3379	0				49646	148.441	0							8512	25.4509	1.387e-15				32061	95.8624	0
19044	56.9416	0							52952	158.327	0				42923	128.34	0	31688	94.7471	0	29245	87.4425	0				49654	148.465	0							8523	25.4838	0				32081	95.9222	0
19110	57.1389	0							52987	158.431	0				42990	128.54	0	31699	94.78	0	29284	87.5592	0				49685	148.558	0							8534	25.5167	0				32086	95.9371	0
19126	57.1867	0							53002	158.476	0				43076	128.797	0	31718	94.8368	0	29352	87.7625	6.614e-15				49688	148.567	0							8537	25.5256	0				32094	95.9611	0
19135	57.2137	0							53036	158.578	0				43099	128.866	0	31753	94.9415	0	29373	87.8253	9.887e-16				49742	148.729	0							8539	25.5316	8.975e-16				32097	95.97	0
19138	57.2226	0							53041	158.593	0				43206	129.186	0	31776	95.0102	0	29385	87.8611	0				49771	148.815	0							8562	25.6004	1.055e-14				32106	95.9969	0
19167	57.3093	0							53149	158.916	0				43207	129.189	0	31788	95.0461	0	29398	87.9	0				49821	148.965	0							8572	25.6303	3.913e-16				32114	96.0209	0
19197	57.399	0							53202	159.074	0				43230	129.258	0	31811	95.1149	0	29401	87.909	0				49857	149.072	0							8573	25.6333	0				32124	96.0508	0
19216	57.4558	0							53204	159.08	0				43261	129.35	0	31819	95.1388	0	29409	87.9329	0				49865	149.096	2.366e-15							8597	25.705	0				32154	96.1405	4.047e-16
19220	57.4678	0							53278	159.301	0				43286	129.425	0	31896	95.369	0	29439	88.0226	7.657e-16				49885	149.156	0							8601	25.717	1.411e-15				32160	96.1584	0
19222	57.4738	0							53280	159.307	0				43318	129.521	0	31998	95.674	0	29457	88.0764	0				50053	149.659	4.982e-15							8609	25.7409	9.796e-16				32163	96.1674	0
19232	57.5037	0							53285	159.322	0				43340	129.587	0	32049	95.8265	0	29522	88.2708	2.36e-15				50062	149.685	0							8619	25.7708	6.332e-16				32168	96.1823	0
19261	57.5904	0							53374	159.588	0				43345	129.602	0	32108	96.0029	0	29548	88.3485	0				50073	149.718	0							8661	25.8964	5.595e-16				32183	96.2272	0
19272	57.6233	0							53377	159.597	0				43449	129.912	0	32159	96.1554	0	29557	88.3754	1.777e-15				50081	149.742	6.532e-16							8667	25.9143	1.259e-15				32194	96.2601	0
19292	57.6831	0							53417	159.717	0				43470	129.975	0	32180	96.2182	0	29584	88.4562	0				50092	149.775	0							8669	25.9203	2.027e-15				32227	96.3587	0
19305	57.7219	0							53444	159.798	0				43536	130.173	0	32205	96.293	0	29591	88.4771	0				50106	149.817	0							8692	25.9891	0				32245	96.4125	0
19312	57.7429	0							53508	159.989	0				43569	130.271	0	32213	96.3169	0	29611	88.5369	0				50174	150.02	0							8715	26.0579	1.286e-15				32247	96.4185	0
19331	57.7997	0							53616	160.312	0				43573	130.283	0	32227	96.3587	0	29617	88.5548	0				50178	150.032	0							8716	26.0608	0				32248	96.4215	0
19376	57.9342	0							53651	160.417	0				43581	130.307	0	32228	96.3617	0	29629	88.5907	1.876e-15				50192	150.074	0							8726	26.0907	1.031e-15				32265	96.4724	0
19391	57.9791	0							53668	160.467	0				43675	130.588	0	32231	96.3707	0	29635	88.6086	0				50219	150.155	0							8731	26.1057	7.421e-16				32274	96.4993	0
19410	58.0359	0							53948	161.304	0				43717	130.714	0	32233	96.3767	0	29659	88.6804	0				50281	150.34	0							8740	26.1326	0				32276	96.5052	0
19464	58.1974	0							54059	161.636	0				43740	130.783	0	32254	96.4395	0	29717	88.8538	0				50314	150.439	6.01e-16							8745	26.1475	3.937e-16				32367	96.7773	0
19518	58.3588	0							54114	161.801	0				43745	130.798	0	32279	96.5142	0	29746	88.9405	0				50520	151.055	1.037e-15							8749	26.1595	0				32375	96.8012	0
19522	58.3708	0							54120	161.819	0				43768	130.866	0	32286	96.5351	0	29787	89.0631	0				50534	151.097	0							8767	26.2133	6.486e-16				32408	96.8999	0
19555	58.4695	0							54137	161.87	0				43779	130.899	0	32291	96.5501	0	29860	89.2814	0				50625	151.369	0							8778	26.2462	0				32482	97.1212	0
19577	58.5352	0							54170	161.968	0				43780	130.902	0	32298	96.571	0	29876	89.3292	0				50668	151.497	0							8788	26.2761	0				32519	97.2318	0
19589	58.5711	0							54186	162.016	0				43786	130.92	0	32337	96.6876	0	29886	89.3591	4.569e-16				50765	151.787	0							8791	26.2851	1.602e-14				32601	97.477	7.532e-16
19601	58.607	0							54206	162.076	0				43801	130.965	0	32359	96.7534	0	29953	89.5595	0				50882	152.137	0							8805	26.327	0				32641	97.5966	0
19613	58.6429	0							54211	162.091	0				43815	131.007	0	32374	96.7983	0	29980	89.6402	9.09e-16				50889	152.158	0							8807	26.3329	0				32653	97.6325	0
19625	58.6788	0							54219	162.115	0				43836	131.07	0	32401	96.879	0	29991	89.6731	0				50926	152.269	0							8810	26.3419	0				32724	97.8448	0
19645	58.7386	0							54268	162.261	0				43879	131.198	0	32402	96.882	0	30002	89.706	0				50933	152.29	0							8821	26.3748	5.891e-16				32726	97.8507	0
19651	58.7565	0							54278	162.291	0				43891	131.234	0	32404	96.888	0	30014	89.7419	0				51025	152.565	0							8830	26.4017	6.853e-16				32734	97.8747	0
19655	58.7685	0							54304	162.369	0				43898	131.255	0	32535	97.2797	0	30027	89.7807	0				51071	152.702	0							8832	26.4077	0				32736	97.8806	0
19676	58.8312	0							54312	162.393	0				43914	131.303	0	32579	97.4112	0	30036	89.8076	5.209e-16				51078	152.723	1.249e-15							8838	26.4256	3.884e-15				32740	97.8926	0
19692	58.8791	0							54328	162.441	0				43962	131.446	0	32603	97.483	0	30076	89.9272	0				51079	152.726	0							8851	26.4645	0				32752	97.9285	0
19713	58.9419	0							54342	162.483	0				43964	131.452	0	32637	97.5846	0	30082	89.9452	0				51086	152.747	0							8860	26.4914	5.888e-16				32827	98.1527	0
19718	58.9568	0							54347	162.498	0				44000	131.56	0	32650	97.6235	0	30089	89.9661	0				51088	152.753	0							8880	26.5512	8.609e-16				32868	98.2753	0
19732	58.9987	0							54401	162.659	0				44010	131.59	0	32656	97.6414	0	30101	90.002	4.553e-16				51099	152.786	0							8894	26.5931	1.1e-15				32882	98.3172	0
19741	59.0256	0							54419	162.713	0				44011	131.593	0	32666	97.6713	0	30162	90.1844	0				51259	153.264	0							8914	26.6529	4.065e-16				32887	98.3321	0
19772	59.1183	0							54493	162.934	0				44024	131.632	0	32685	97.7281	0	30165	90.1933	0				51289	153.354	0							8916	26.6588	4.071e-16				32895	98.356	0
19775	59.1273	0							54508	162.979	0				44073	131.778	0	32691	97.7461	0	30175	90.2233	4.496e-16				51295	153.372	0							8949	26.7575	1.592e-14				32898	98.365	0
19809	59.2289	0							54512	162.991	0				44097	131.85	0	32718	97.8268	0	30179	90.2352	5.505e-16				51304	153.399	4.507e-16							8976	26.8382	0				32951	98.5235	0
19824	59.2738	0							54548	163.099	0				44151	132.012	0	32793	98.0511	0	30215	90.3428	0				51340	153.507	0							8984	26.8622	0				32965	98.5653	0
19839	59.3186	0							54593	163.233	0				44170	132.068	0	32859	98.2484	0	30226	90.3757	0				51361	153.569	0							8992	26.8861	0				32973	98.5893	0
19849	59.3485	0							54606	163.272	0				44182	132.104	0	32861	98.2544	0	30236	90.4056	0				51454	153.847	0							9000	26.91	0				32980	98.6102	0
19852	59.3575	0							54637	163.365	0				44192	132.134	0	32866	98.2693	0	30255	90.4625	0				51473	153.904	0							9004	26.922	0				33008	98.6939	0
19857	59.3724	0							54654	163.416	0				44228	132.242	0	32869	98.2783	0	30284	90.5492	0				51478	153.919	2.017e-15							9006	26.9279	0				33062	98.8554	0
19878	59.4352	0							54663	163.442	0				44267	132.358	0	32908	98.3949	0	30291	90.5701	6.473e-16				51490	153.955	1.415e-14							9022	26.9758	3.64e-15				33082	98.9152	0
19894	59.4831	0							54714	163.595	0				44269	132.364	0	32932	98.4667	0	30301	90.6	0				51533	154.084	6.488e-16							9026	26.9877	5.961e-15				33097	98.96	0
19899	59.498	0							54774	163.774	0				44280	132.397	0	32990	98.6401	0	30362	90.7824	0				51536	154.093	0							9027	26.9907	0				33133	99.0677	0
19930	59.5907	0							54839	163.969	0				44294	132.439	0	33023	98.7388	9.285e-16	30365	90.7913	0				51538	154.099	0							9028	26.9937	0				33148	99.1125	0
19936	59.6086	0							54843	163.981	0				44304	132.469	0	33055	98.8345	0	30388	90.8601	0				51545	154.12	2.776e-15							9047	27.0505	0				33178	99.2022	0
19940	59.6206	0							54905	164.166	0				44313	132.496	0	33081	98.9122	0	30407	90.9169	0				51571	154.197	0							9052	27.0655	3.155e-15				33240	99.3876	0
19959	59.6774	0							54915	164.196	0				44321	132.52	0	33204	99.28	0	30447	91.0365	0				51602	154.29	5.597e-16							9054	27.0715	0				33242	99.3936	0
19971	59.7133	0							55071	164.662	0				44326	132.535	0	33247	99.4085	0	30484	91.1472	0				51685	154.538	0							9058	27.0834	1.206e-15				33272	99.4833	0
19985	59.7552	0							55075	164.674	0				44387	132.717	0	33254	99.4295	0	30497	91.186	0				51818	154.936	0							9060	27.0894	0				33279	99.5042	0
19996	59.788	0							55096	164.737	0				44396	132.744	0	33265	99.4624	0	30505	91.21	0				51820	154.942	0							9075	27.1343	0				33324	99.6388	0
20005	59.815	0							55167	164.949	0				44406	132.774	0	33273	99.4863	0	30507	91.2159	0				51824	154.954	0							9080	27.1492	0				33355	99.7314	0
20025	59.8747	0							55193	165.027	0				44474	132.977	0	33405	99.8809	0	30512	91.2309	0				51846	155.019	0							9089	27.1761	0				33392	99.8421	0
20060	59.9794	0							55292	165.323	0				44561	133.237	0	33444	99.9976	0	30556	91.3624	0				51852	155.037	0							9094	27.1911	0				33417	99.9168	0
20065	59.9943	0							55364	165.538	0				44613	133.393	0	33452	100.022	0	30577	91.4252	3.95e-15				51857	155.052	0							9100	27.209	0				33447	100.007	0
20113	60.1379	0							55430	165.736	0				44616	133.402	0	33461	100.048	0	30583	91.4432	0				52057	155.65	0							9107	27.2299	0				33456	100.033	0
20140	60.2186	0							55540	166.065	0				44618	133.408	0	33502	100.171	0	30638	91.6076	0				52105	155.794	0							9111	27.2419	4.464e-15				33558	100.338	0
20142	60.2246	0							55618	166.298	0				44661	133.536	0	33559	100.341	0	30655	91.6585	0				52110	155.809	3.963e-16							9118	27.2628	5.161e-16				33567	100.365	0
20166	60.2963	0							55623	166.313	0				44794	133.934	0	33594	100.446	0	30666	91.6913	0				52192	156.054	0							9120	27.2688	5.168e-16				33609	100.491	0
20170	60.3083	0							55633	166.343	0				44897	134.242	0	33596	100.452	0	30680	91.7332	1.005e-15				52199	156.075	0							9139	27.3256	4.092e-16				33629	100.551	0
20198	60.392	0							55635	166.349	0				44941	134.374	0	33704	100.775	0	30754	91.9545	0				52202	156.084	0							9145	27.3436	0				33653	100.623	0
20200	60.398	0							55643	166.373	0				44952	134.406	0	33749	100.909	0	30814	92.1339	0				52238	156.192	0							9156	27.3764	6.991e-16				33657	100.634	0
20216	60.4458	0							55659	166.42	0				45023	134.619	0	33770	100.972	0	30829	92.1787	4.476e-15				52424	156.748	0							9159	27.3854	1.929e-15				33800	101.062	0
20219	60.4548	0							55662	166.429	0				45048	134.694	0	33799	101.059	0	30830	92.1817	0				52459	156.852	0							9174	27.4303	0				33847	101.203	0
20223	60.4668	0							55666	166.441	0				45060	134.729	0	33829	101.149	0	30867	92.2923	0				52477	156.906	5.083e-16							9178	27.4422	0				33859	101.238	4.202e-16
20224	60.4698	0							55668	166.447	0				45122	134.915	0	33886	101.319	0	30883	92.3402	0				52652	157.429	0							9190	27.4781	0				33872	101.277	0
20236	60.5056	0							55674	166.465	0				45182	135.094	0	33929	101.448	0	30887	92.3521	9.702e-16				52661	157.456	0							9194	27.4901	0				33882	101.307	0
20307	60.7179	0							55676	166.471	0				45250	135.298	0	33953	101.519	0	30891	92.3641	0				52662	157.459	0							9197	27.499	7.778e-16				33937	101.472	0
20314	60.7389	0							55687	166.504	0				45276	135.375	0	33959	101.537	0	30943	92.5196	0				52665	157.468	1.217e-15							9223	27.5768	1.381e-15				33944	101.493	0
20326	60.7747	0							55689	166.51	0				45290	135.417	0	33988	101.624	0	31001	92.693	6.984e-16				52716	157.621	0							9242	27.6336	0				33958	101.534	0
20332	60.7927	0							55692	166.519	0				45315	135.492	0	33995	101.645	0	31014	92.7319	0				52753	157.732	0							9249	27.6545	0				33981	101.603	0
20338	60.8106	0							55710	166.573	0				45394	135.728	0	34055	101.824	0	31099	92.986	0				52789	157.839	6.61e-16							9253	27.6665	0				34062	101.845	0
20340	60.8166	0							55712	166.579	0				45402	135.752	0	34067	101.86	6.585e-16	31118	93.0428	0				52890	158.141	0							9255	27.6725	0				34083	101.908	0
20342	60.8226	0							55718	166.597	0				45499	136.042	0	34097	101.95	0	31123	93.0578	0				52904	158.183	4.592e-16							9262	27.6934	8.895e-16				34095	101.944	0
20365	60.8914	0							55722	166.609	0				45539	136.162	0	34102	101.965	0	31126	93.0667	0				52910	158.201	0							9274	27.7293	0				34122	102.025	0
20391	60.9691	0							55726	166.621	0				45556	136.212	0	34104	101.971	0	31130	93.0787	0				52915	158.216	0							9275	27.7323	0				34143	102.088	0
20407	61.0169	0							55731	166.636	0				45581	136.287	0	34116	102.007	0	31217	93.3388	0				52926	158.249	0							9281	27.7502	2.208e-15				34147	102.1	0
20413	61.0349	0							55739	166.66	0				45583	136.293	0	34128	102.043	0	31221	93.3508	1.033e-15				52951	158.323	0							9283	27.7562	0				34177	102.189	0
20429	61.0827	0							55742	166.669	0				45623	136.413	0	34147	102.1	0	31224	93.3598	0				52967	158.371	0							9287	27.7681	4.675e-15				34193	102.237	0
20468	61.1993	0							55749	166.69	0				45627	136.425	0	34187	102.219	0	31236	93.3956	6.645e-16				52983	158.419	0							9289	27.7741	0				34196	102.246	0
20473	61.2143	0							55757	166.713	0				45656	136.511	0	34197	102.249	0	31299	93.584	7.25e-16				52990	158.44	0							9301	27.81	0				34199	102.255	0
20490	61.2651	0							55796	166.83	0				45670	136.553	0	34229	102.345	0	31316	93.6348	0				53040	158.59	0							9314	27.8489	0				34211	102.291	0
20495	61.2801	0							55806	166.86	0				45672	136.559	0	34267	102.458	0	31371	93.7993	0				53076	158.697	0							9318	27.8608	1.026e-15				34233	102.357	0
20497	61.286	0							55813	166.881	0				45673	136.562	0	34302	102.563	0	31373	93.8053	0				53078	158.703	0							9328	27.8907	8.915e-16				34246	102.395	0
20517	61.3458	0							55816	166.89	0				45683	136.592	0	34310	102.587	0	31422	93.9518	0				53197	159.059	4.041e-16							9331	27.8997	1.683e-15				34263	102.446	0
20526	61.3727	0							55826	166.92	0				45708	136.667	0	34311	102.59	0	31427	93.9667	0				53257	159.238	0							9334	27.9087	9.473e-16				34268	102.461	0
20534	61.3967	0							55841	166.965	0				45712	136.679	0	34332	102.653	0	31430	93.9757	0				53280	159.307	0							9345	27.9415	4.62e-16				34271	102.47	0
20555	61.4595	0							55845	166.977	0				45718	136.697	0	34341	102.68	0	31435	93.9907	9.219e-15				53426	159.744	0							9352	27.9625	9.376e-16				34302	102.563	0
20567	61.4953	0							55859	167.018	0				45736	136.751	0	34354	102.719	0	31438	93.9996	0				53517	160.016	0							9358	27.9804	0				34310	102.587	0
20585	61.5491	0							55864	167.033	0				45796	136.93	0	34359	102.733	0	31463	94.0744	8.303e-16				53528	160.049	0							9378	28.0402	0				34317	102.608	0
20590	61.5641	0							55900	167.141	0				45841	137.065	0	34372	102.772	0	31542	94.3106	0				53540	160.085	0							9403	28.115	0				34343	102.686	9.126e-16
20601	61.597	0							55919	167.198	0				45925	137.316	0	34386	102.814	0	31556	94.3524	1.752e-15				53602	160.27	0							9414	28.1479	0				34360	102.736	0
20618	61.6478	0							55937	167.252	0				45942	137.367	0	34393	102.835	0	31563	94.3734	0				53644	160.396	0							9416	28.1538	1.167e-15				34379	102.793	0
20620	61.6538	0							55951	167.293	0				46015	137.585	0	34400	102.856	0	31580	94.4242	8.481e-15				53666	160.461	0							9429	28.1927	0				34446	102.993	0
20645	61.7285	0							55971	167.353	0				46046	137.678	0	34431	102.949	0	31612	94.5199	0				53704	160.575	0							9434	28.2077	9.426e-16				34472	103.071	0
20664	61.7854	0							55975	167.365	0				46058	137.713	0	34473	103.074	0	31621	94.5468	0				53761	160.745	0							9442	28.2316	0				34479	103.092	0
20726	61.9707	0							55977	167.371	0				46060	137.719	0	34492	103.131	0	31638	94.5976	0				53849	161.008	0							9452	28.2615	0				34484	103.107	0
20733	61.9917	0							56001	167.443	0				46126	137.917	0	34522	103.221	0	31704	94.795	0				53868	161.065	0							9457	28.2764	0				34496	103.143	0
20741	62.0156	0							56033	167.539	0				46134	137.941	0	34680	103.693	0	31734	94.8847	0				53889	161.128	5.352e-16							9472	28.3213	0				34506	103.173	0
20747	62.0335	0							56068	167.643	0				46312	138.473	0	34718	103.807	0	31749	94.9295	0				53905	161.176	0							9476	28.3332	2.593e-15				34530	103.245	0
20769	62.0993	0							56148	167.882	0				46327	138.518	0	34745	103.888	0	31785	95.0371	5.306e-16				53936	161.269	0							9481	28.3482	2.301e-15				34534	103.257	6.606e-16
20789	62.1591	0							56156	167.906	0				46337	138.548	0	34779	103.989	0	31807	95.1029	0				53995	161.445	0							9483	28.3542	0				34544	103.287	0
20791	62.1651	0							56160	167.918	0				46340	138.557	0	34789	104.019	0	31865	95.2764	0				54117	161.81	0							9486	28.3631	0				34552	103.311	0
20802	62.198	0							56228	168.122	0				46453	138.894	0	34822	104.118	0	31904	95.393	0				54139	161.876	0							9494	28.3871	4.657e-16				34574	103.376	0
20808	62.2159	0							56281	168.28	0				46469	138.942	0	34844	104.184	0	31915	95.4258	0				54195	162.043	0							9498	28.399	1.285e-14				34579	103.391	0
20833	62.2907	0							56297	168.328	0				46489	139.002	0	34874	104.273	0	32000	95.68	0				54258	162.231	0							9499	28.402	0				34613	103.493	0
20842	62.3176	0							56302	168.343	0				46526	139.113	0	34877	104.282	0	32005	95.695	0				54399	162.653	0							9500	28.405	0				34620	103.514	0
20850	62.3415	0							56316	168.385	0				46576	139.262	0	34970	104.56	0	32034	95.7817	0				54425	162.731	0							9516	28.4528	2.116e-15				34625	103.529	0
20858	62.3654	0							56330	168.427	0				46582	139.28	0	35013	104.689	0	32067	95.8803	0				54450	162.805	0							9525	28.4797	0				34628	103.538	0
20888	62.4551	0							56401	168.639	0				46597	139.325	0	35034	104.752	0	32074	95.9013	0				54479	162.892	0							9528	28.4887	0				34633	103.553	0
20924	62.5628	0							56511	168.968	0				46637	139.445	0	35113	104.988	0	32085	95.9342	0				54504	162.967	0							9532	28.5007	3.705e-16				34636	103.562	0
20974	62.7123	0							56532	169.031	0				46638	139.448	0	35225	105.323	1.628e-15	32123	96.0478	0				54640	163.374	0							9534	28.5067	0				34656	103.621	0
20984	62.7422	0							56614	169.276	0				46680	139.573	0	35236	105.356	0	32147	96.1195	4.877e-15				54702	163.559	0							9564	28.5964	0				34659	103.63	0
21048	62.9335	0							56695	169.518	0				46682	139.579	0	35252	105.403	0	32153	96.1375	4.274e-16				54742	163.679	0							9572	28.6203	1.174e-15				34663	103.642	0
21059	62.9664	0							56758	169.706	0				46703	139.642	0	35294	105.529	0	32189	96.2451	0				54828	163.936	0							9608	28.7279	0				34717	103.804	0
21065	62.9843	0							56898	170.125	0				46708	139.657	0	35306	105.565	0	32237	96.3886	0				54840	163.972	0							9612	28.7399	0				34720	103.813	0
21114	63.1309	0							57137	170.84	0				46732	139.729	0	35315	105.592	0	32253	96.4365	0				54847	163.993	0							9623	28.7728	0				34737	103.864	0
21157	63.2594	0							57461	171.808	0				46746	139.77	0	35332	105.643	0	32307	96.5979	0				54892	164.127	3.957e-16							9630	28.7937	7.072e-16				34755	103.918	0
21168	63.2923	0							57465	171.82	0				46950	140.381	0	35371	105.759	0	32332	96.6727	0				54896	164.139	0							9641	28.8266	8.743e-16				34756	103.92	0
21181	63.3312	0							57487	171.886	0				46999	140.527	0	35385	105.801	0	32339	96.6936	3.249e-15				54907	164.172	0							9653	28.8625	8.151e-16				34769	103.959	0
21207	63.4089	0							57516	171.973	0				47045	140.665	0	35409	105.873	0	32349	96.7235	5.502e-16				54957	164.321	0							9665	28.8984	4.388e-16				34805	104.067	0
21211	63.4209	0							57531	172.018	0				47072	140.745	0	35489	106.112	0	32387	96.8371	0				55026	164.528	0							9669	28.9103	0				34813	104.091	0
21218	63.4418	0							57577	172.155	0				47080	140.769	0	35499	106.142	0	32406	96.8939	0				55031	164.543	4.024e-16							9673	28.9223	1.834e-14				34875	104.276	0
21233	63.4867	0							57622	172.29	0				47128	140.913	0	35543	106.274	0	32433	96.9747	0				55039	164.567	0							9677	28.9342	1.011e-15				34879	104.288	0
21253	63.5465	0							57947	173.262	0				47146	140.966	0	35610	106.474	0	32441	96.9986	0				55043	164.579	0							9683	28.9522	0				34885	104.306	0
21270	63.5973	0							57961	173.303	0				47196	141.116	0	35655	106.609	0	32484	97.1272	0				55071	164.662	0							9688	28.9671	5.38e-16				34904	104.363	0
21289	63.6541	0							58045	173.555	0				47255	141.292	0	35670	106.653	0	32501	97.178	0				55085	164.704	0							9691	28.9761	1.738e-14				34963	104.539	0
21305	63.702	0							58076	173.647	0				47264	141.319	0	35787	107.003	0	32509	97.2019	0				55090	164.719	0							9700	29.003	0				34998	104.644	0
21367	63.8873	0							58113	173.758	0				47284	141.379	0	35867	107.242	0	32524	97.2468	2.095e-14				55096	164.737	0							9739	29.1196	0				35003	104.659	0
21369	63.8933	0							58128	173.803	0				47356	141.594	0	35870	107.251	0	32551	97.3275	0				55111	164.782	0							9746	29.1405	0				35081	104.892	0
21385	63.9412	0							58140	173.839	0				47526	142.103	0	35968	107.544	0	32585	97.4292	0				55163	164.937	0							9757	29.1734	0				35115	104.994	0
21410	64.0159	0							58289	174.284	0				47560	142.204	0	35985	107.595	0	32597	97.465	2.159e-15				55181	164.991	0							9759	29.1794	0				35204	105.26	0
21432	64.0817	0							58308	174.341	0				47562	142.21	0	36008	107.664	0	32618	97.5278	0				55234	165.15	0							9767	29.2033	6.924e-16				35255	105.412	0
21436	64.0936	0							58352	174.472	0				47567	142.225	0	36099	107.936	0	32636	97.5816	0				55273	165.266	0							9772	29.2183	0				35280	105.487	0
21457	64.1564	0							58413	174.655	0				47669	142.53	0	36206	108.256	0	32638	97.5876	0				55386	165.604	0							9795	29.2871	5.501e-16				35286	105.505	0
21477	64.2162	0							58468	174.819	0				47810	142.952	0	36228	108.322	0	32660	97.6534	0				55387	165.607	0							9798	29.296	0				35287	105.508	7.844e-16
21497	64.276	0							58482	174.861	0				47863	143.11	0	36230	108.328	0	32668	97.6773	1.568e-15				55402	165.652	0							9808	29.3259	0				35290	105.517	0
21500	64.285	0							58548	175.059	0				47968	143.424	0	36247	108.379	0	32734	97.8747	0				55479	165.882	0							9829	29.3887	7.761e-15				35316	105.595	0
21503	64.294	0							58596	175.202	0				48012	143.556	0	36262	108.423	0	32739	97.8896	0				55530	166.035	0							9848	29.4455	0				35329	105.634	0
21527	64.3657	0							58618	175.268	0				48057	143.69	0	36268	108.441	0	32765	97.9673	0				55662	166.429	0							9853	29.4605	0				35352	105.703	0
21535	64.3897	0							58879	176.048	0				48197	144.109	0	36272	108.453	0	32782	98.0182	7.91e-15				55668	166.447	0							9855	29.4665	0				35354	105.709	0
21540	64.4046	0							58908	176.135	0				48201	144.121	0	36278	108.471	0	32793	98.0511	3.938e-16				55673	166.462	0							9857	29.4724	0				35386	105.804	0
21545	64.4196	0							59028	176.494	0				48204	144.13	0	36299	108.534	0	32823	98.1408	0				55823	166.911	0							9865	29.4963	0				35411	105.879	0
21564	64.4764	0							59033	176.509	0				48230	144.208	0	36376	108.764	0	32866	98.2693	0				55874	167.063	6.735e-16							9872	29.5173	1.077e-15				35420	105.906	0
21567	64.4853	0							59296	177.295	0				48247	144.258	0	36387	108.797	0	32876	98.2992	0				55917	167.192	0							9876	29.5292	0				35428	105.93	0
21578	64.5182	0							59527	177.986	0				48305	144.432	0	36396	108.824	0	32898	98.365	0				55956	167.308	0							9908	29.6249	1.03e-15				35474	106.067	0
21593	64.5631	0							59715	178.548	0				48367	144.617	0	36547	109.275	0	32905	98.386	0				55976	167.368	0							9915	29.6458	5.037e-16				35494	106.127	0
21619	64.6408	0							60026	179.478	0				48388	144.68	0	36600	109.434	0	32944	98.5026	0				55991	167.413	0							9932	29.6967	3.239e-15				35517	106.196	0
21624	64.6558	0							60274	180.219	0				48449	144.863	0	36651	109.587	0	32947	98.5115	0				56084	167.691	0							9941	29.7236	0				35541	106.268	0
21671	64.7963	0							60345	180.432	0				48507	145.036	0	36684	109.685	9.863e-16	32969	98.5773	1.103e-15				56126	167.817	0							9950	29.7505	0				35544	106.277	0
21672	64.7993	0							60349	180.444	0				48579	145.251	0	36795	110.017	0	32978	98.6042	0				56155	167.903	8.039e-16							9954	29.7625	3.527e-15				35556	106.312	0
21688	64.8471	0													48624	145.386	0	36861	110.214	0	32982	98.6162	0				56161	167.921	1.157e-15							9964	29.7924	1.2e-15				35628	106.528	0
21695	64.868	0													48643	145.443	0	36873	110.25	0	32997	98.661	0				56223	168.107	0							9974	29.8223	0				35632	106.54	0
21723	64.9518	0													48652	145.47	0	36996	110.618	0	33004	98.682	0				56287	168.298	0							9977	29.8312	0				35744	106.875	0
21778	65.1162	0													48659	145.49	0	37015	110.675	0	33018	98.7238	0				56416	168.684	0							9990	29.8701	0				35751	106.895	0
21787	65.1431	0													48684	145.565	0	37021	110.693	0	33023	98.7388	5.684e-16				56419	168.693	7.373e-16							9994	29.8821	5.462e-15				35760	106.922	0
21806	65.1999	0													48751	145.766	0	37052	110.785	0	33045	98.8046	0				56462	168.821	0							9998	29.894	5.965e-16				35761	106.925	0
21814	65.2239	0													48764	145.804	0	37079	110.866	0	33058	98.8434	0				56470	168.845	0							10007	29.9209	0				35762	106.928	0
21825	65.2567	0													48769	145.819	0	37172	111.144	0	33079	98.9062	5.209e-16				56474	168.857	0							10011	29.9329	1.681e-15				35770	106.952	0
21827	65.2627	0													48775	145.837	0	37183	111.177	0	33156	99.1364	0				56483	168.884	0							10022	29.9658	0				35777	106.973	0
21849	65.3285	0													48795	145.897	0	37191	111.201	0	33171	99.1813	0				56557	169.105	0							10025	29.9748	0				35819	107.099	0
21853	65.3405	0													48847	146.053	0	37201	111.231	1.969e-15	33196	99.256	0				56604	169.246	0							10034	30.0017	0				35832	107.138	0
21905	65.496	0													48878	146.145	0	37211	111.261	0	33213	99.3069	0				56672	169.449	0							10037	30.0106	5.074e-15				35928	107.425	0
21913	65.5199	0													48982	146.456	0	37221	111.291	0	33243	99.3966	0				56729	169.62	1.836e-15							10041	30.0226	0				35950	107.49	0
21936	65.5886	0													49015	146.555	0	37271	111.44	0	33258	99.4414	4.739e-16				56772	169.748	6.973e-16							10047	30.0405	1.092e-15				35961	107.523	4.208e-16
21996	65.768	0													49046	146.648	0	37280	111.467	0	33271	99.4803	0				56786	169.79	9.896e-16							10054	30.0615	0				36014	107.682	0
22005	65.795	0													49047	146.65	0	37311	111.56	0	33296	99.555	0				56803	169.841	0							10060	30.0794	0				36025	107.715	0
22008	65.8039	0													49053	146.668	0	37315	111.572	0	33326	99.6447	0				56831	169.925	0							10062	30.0854	3.067e-15				36026	107.718	0
22022	65.8458	0													49055	146.674	0	37323	111.596	0	33335	99.6716	0				56932	170.227	0							10082	30.1452	5.264e-16				36043	107.769	0
22036	65.8876	0													49115	146.854	0	37328	111.611	0	33356	99.7344	0				57043	170.559	0							10085	30.1542	4.48e-16				36067	107.84	0
22039	65.8966	0													49119	146.866	0	37343	111.656	0	33364	99.7584	0				57105	170.744	0							10099	30.196	0				36082	107.885	0
22078	66.0132	0													49171	147.021	0	37345	111.662	0	33369	99.7733	0				57109	170.756	0							10104	30.211	5.456e-16				36088	107.903	0
22081	66.0222	0													49192	147.084	0	37349	111.674	0	33386	99.8241	0				57146	170.867	0							10118	30.2528	0				36103	107.948	0
22100	66.079	0													49358	147.58	0	37365	111.721	0	33454	100.028	0				57209	171.055	0							10128	30.2827	0				36133	108.038	0
22125	66.1538	0													49389	147.673	0	37387	111.787	0	33515	100.21	0				57211	171.061	0							10137	30.3096	7.978e-16				36138	108.053	0
22197	66.369	0													49451	147.858	0	37396	111.814	0	33527	100.246	4.21e-16				57276	171.255	0							10156	30.3664	4.147e-16				36177	108.169	8.906e-16
22208	66.4019	0													49501	148.008	0	37416	111.874	0	33533	100.264	0				57327	171.408	0							10161	30.3814	2.619e-15				36197	108.229	0
22225	66.4527	0													49583	148.253	0	37461	112.008	0	33583	100.413	0				57340	171.447	0							10186	30.4561	0				36202	108.244	0
22246	66.5155	0													49620	148.364	0	37463	112.014	0	33605	100.479	0				57436	171.734	0							10187	30.4591	1.719e-14				36226	108.316	0
22251	66.5305	0													49643	148.433	0	37478	112.059	0	33630	100.554	0				57443	171.755	0							10191	30.4711	0				36308	108.561	0
22367	66.8773	0													49694	148.585	0	37552	112.281	0	33648	100.608	0				57460	171.805	0							10193	30.4771	0				36320	108.597	0
22478	67.2092	0													49821	148.965	0	37557	112.295	0	33655	100.629	0				57580	172.164	1.004e-15							10197	30.489	0				36344	108.669	0
22494	67.2571	0													49916	149.249	0	37578	112.358	0	33664	100.655	0				57657	172.394	0							10202	30.504	0				36353	108.695	0
22525	67.3498	0													49926	149.279	0	37640	112.544	0	33675	100.688	0				57739	172.64	6.031e-16							10207	30.5189	5.849e-16				36357	108.707	0
22530	67.3647	0													49953	149.359	0	37646	112.561	0	33690	100.733	0				57767	172.723	4.299e-16							10215	30.5429	9.734e-16				36360	108.716	0
22539	67.3916	0													50026	149.578	0	37650	112.573	6.205e-16	33720	100.823	0				57781	172.765	0							10226	30.5757	4.598e-16				36387	108.797	0
22557	67.4454	0													50082	149.745	0	37652	112.579	0	33782	101.008	5.776e-15				57893	173.1	0							10235	30.6027	6.878e-16				36396	108.824	0
22651	67.7265	0													50155	149.963	0	37656	112.591	0	33808	101.086	0				57932	173.217	4.716e-16							10238	30.6116	0				36401	108.839	0
22690	67.8431	0													50203	150.107	0	37671	112.636	0	33814	101.104	2.644e-15				57964	173.312	0							10241	30.6206	0				36421	108.899	0
22731	67.9657	0													50229	150.185	0	37674	112.645	0	33815	101.107	0				57977	173.351	0							10250	30.6475	0				36437	108.947	0
22747	68.0135	0													50258	150.271	1.372e-14	37679	112.66	0	33845	101.197	0				58019	173.477	0							10258	30.6714	0				36444	108.968	0
22819	68.2288	0													50299	150.394	0	37692	112.699	0	33900	101.361	0				58028	173.504	0							10260	30.6774	8.567e-16				36471	109.048	0
22864	68.3634	0													50343	150.526	0	37725	112.798	0	33914	101.403	0				58098	173.713	0							10272	30.7133	0				36583	109.383	0
22875	68.3962	0													50429	150.783	0	37730	112.813	0	33920	101.421	0				58166	173.916	4.437e-16							10280	30.7372	3.925e-16				36589	109.401	0
22885	68.4262	0													50430	150.786	0	37737	112.834	0	33994	101.642	0				58191	173.991	0							10305	30.8119	1.548e-15				36682	109.679	0
22910	68.5009	0													50493	150.974	0	37755	112.888	0	34007	101.681	0				58192	173.994	0							10310	30.8269	0				36690	109.703	0
22920	68.5308	0													50529	151.082	0	37805	113.037	0	34044	101.792	0				58253	174.177	0							10315	30.8419	3.133e-15				36712	109.769	0
22923	68.5398	0													50535	151.1	0	37808	113.046	0	34087	101.92	0				58325	174.392	0							10327	30.8777	2.767e-15				36727	109.814	0
22971	68.6833	0													50612	151.33	0	37820	113.082	0	34110	101.989	0				58366	174.514	0							10333	30.8957	0				36749	109.879	0
22977	68.7012	0													50665	151.488	0	37912	113.357	0	34193	102.237	0				58419	174.673	0							10337	30.9076	3.448e-15				36755	109.897	0
22987	68.7311	0													50683	151.542	0	37944	113.453	0	34215	102.303	0				58426	174.694	0							10346	30.9345	0				36794	110.014	0
22999	68.767	0													50727	151.674	0	37957	113.491	0	34224	102.33	0				58437	174.727	0							10354	30.9585	7.417e-15				36838	110.146	0
23003	68.779	0													50747	151.733	0	37982	113.566	1.536e-15	34238	102.372	0				58583	175.163	0							10360	30.9764	0				36846	110.169	0
23006	68.7879	0													50748	151.737	0	37983	113.569	0	34321	102.62	0				58663	175.402	0							10361	30.9794	1.279e-15				36851	110.184	0
23014	68.8119	0													50875	152.116	0	37987	113.581	7.18e-16	34381	102.799	0				58891	176.084	0							10367	30.9973	1.121e-15				36906	110.349	0
23017	68.8208	0													50905	152.206	0	37995	113.605	0	34451	103.008	0				59038	176.524	0							10378	31.0302	0				36917	110.382	0
23072	68.9853	0													51092	152.765	0	37998	113.614	0	34508	103.179	0				59043	176.539	0							10383	31.0452	4.608e-16				36927	110.412	0
23090	69.0391	0													51140	152.909	0	38052	113.775	0	34516	103.203	7.499e-16				59069	176.616	0							10396	31.084	5.876e-15				36945	110.466	0
23125	69.1437	0													51161	152.971	0	38079	113.856	0	34572	103.37	5.491e-16				59074	176.631	0							10422	31.1618	7.366e-16				36957	110.501	0
23134	69.1707	0													51178	153.022	0	38118	113.973	0	34583	103.403	1.202e-15				59098	176.703	0							10426	31.1737	1.854e-15				36982	110.576	0
23179	69.3052	0													51183	153.037	0	38131	114.012	0	34635	103.559	0				59142	176.835	0							10433	31.1947	1.413e-15				37019	110.687	0
23184	69.3202	0													51293	153.366	0	38138	114.033	0	34752	103.909	0				59157	176.879	0							10453	31.2545	3.294e-15				37033	110.729	0
23193	69.3471	0													51295	153.372	0	38139	114.036	0	34847	104.192	0				59308	177.331	0							10457	31.2664	0				37044	110.762	0
23239	69.4846	0													51401	153.689	0	38142	114.045	0	34860	104.231	0				59331	177.4	0							10470	31.3053	2.388e-15				37114	110.971	0
23336	69.7746	0													51404	153.698	0	38213	114.257	0	34877	104.282	0				59332	177.403	0							10475	31.3203	0				37185	111.183	1.985e-15
23342	69.7926	0													51473	153.904	0	38230	114.308	0	34886	104.309	0				59404	177.618	0							10481	31.3382	0				37187	111.189	0
23353	69.8255	0													51490	153.955	0	38281	114.46	0	35047	104.79	0				59442	177.732	0							10485	31.3501	1.295e-15				37194	111.21	1.681e-15
23358	69.8404	0													51508	154.009	0	38318	114.571	0	35053	104.808	4.075e-16				59544	178.037	8.292e-16							10501	31.398	0				37219	111.285	0
23367	69.8673	0													51614	154.326	0	38329	114.604	0	35073	104.868	6.433e-16				59614	178.246	0							10518	31.4488	0				37229	111.315	0
23377	69.8972	0													51705	154.598	0	38344	114.649	0	35076	104.877	0				59833	178.901	0							10538	31.5086	1.726e-15				37266	111.425	0
23384	69.9182	0													51767	154.783	0	38348	114.66	0	35082	104.895	1.146e-15				59840	178.922	0							10540	31.5146	0				37268	111.431	0
23386	69.9241	0													51784	154.834	0	38376	114.744	0	35086	104.907	0				59854	178.964	1.569e-15							10554	31.5565	0				37302	111.533	0
23401	69.969	0													51851	155.035	0	38393	114.795	0	35095	104.934	0				59868	179.005	0							10570	31.6043	0				37319	111.584	0
23446	70.1035	0													51866	155.079	0	38408	114.84	0	35102	104.955	0				59878	179.035	0							10574	31.6163	0				37335	111.632	0
23468	70.1693	0													52018	155.534	0	38497	115.106	0	35137	105.06	0				59894	179.083	0							10586	31.6521	0				37342	111.653	0
23497	70.256	0													52083	155.728	0	38553	115.273	0	35168	105.152	0				59970	179.31	0							10594	31.6761	0				37343	111.656	6.951e-16
23518	70.3188	0													52257	156.248	0	38568	115.318	0	35172	105.164	0				59981	179.343	0							10606	31.7119	0				37416	111.874	0
23520	70.3248	0													52280	156.317	0	38593	115.393	0	35181	105.191	0				60014	179.442	0							10612	31.7299	0				37420	111.886	0
23525	70.3397	0													52288	156.341	0	38597	115.405	0	35275	105.472	0				60021	179.463	5.134e-16							10614	31.7359	0				37444	111.958	0
23530	70.3547	0													52319	156.434	0	38600	115.414	0	35289	105.514	0				60026	179.478	1.469e-15							10627	31.7747	9.852e-16				37484	112.077	0
23596	70.552	0													52325	156.452	0	38621	115.477	0	35294	105.529	0				60033	179.499	0							10628	31.7777	0				37492	112.101	0
23617	70.6148	0													52342	156.503	0	38633	115.513	0	35304	105.559	6.036e-16				60035	179.505	0							10636	31.8016	9.717e-15				37540	112.245	0
23630	70.6537	0													52354	156.538	0	38637	115.525	0	35335	105.652	0				60043	179.529	0							10651	31.8465	1.257e-15				37552	112.281	0
23696	70.851	0													52385	156.631	0	38643	115.543	0	35338	105.661	6.924e-16				60058	179.573	0							10662	31.8794	0				37587	112.385	0
23702	70.869	0													52411	156.709	0	38666	115.611	0	35362	105.732	0				60255	180.162	0							10663	31.8824	4.087e-16				37610	112.454	0
23705	70.8779	0													52502	156.981	0	38668	115.617	0	35431	105.939	0				60296	180.285	0							10688	31.9571	0				37624	112.496	0
23715	70.9078	0													52514	157.017	0	38671	115.626	0	35484	106.097	0				60368	180.5	0							10693	31.9721	0				37639	112.541	0
23724	70.9348	0													52622	157.34	0	38674	115.635	0	35509	106.172	1.054e-15				60391	180.569	0							10706	32.0109	1.139e-15				37678	112.657	0
23731	70.9557	0													52665	157.468	0	38701	115.716	0	35530	106.235	0													10708	32.0169	0				37714	112.765	0
23734	70.9647	0													52772	157.788	0	38732	115.809	0	35554	106.306	0													10712	32.0289	0				37726	112.801	0
23737	70.9736	0													52855	158.036	0	38746	115.85	0	35575	106.369	0													10737	32.1036	0				37729	112.81	0
23742	70.9886	0													52871	158.084	0	38759	115.889	0	35598	106.438	0													10745	32.1275	1.642e-15				37744	112.855	0
23758	71.0364	0													52889	158.138	0	38778	115.946	0	35604	106.456	1.058e-15													10761	32.1754	3.855e-16				37794	113.004	0
23768	71.0663	0													52892	158.147	0	38781	115.955	0	35605	106.459	0													10777	32.2232	3.707e-16				37798	113.016	0
23786	71.1201	0													52898	158.165	0	38786	115.97	0	35629	106.531	0													10798	32.286	4.621e-16				37816	113.07	0
23798	71.156	0													52954	158.333	0	38790	115.982	0	35645	106.579	0													10799	32.289	0				37827	113.103	0
23816	71.2098	0													52991	158.443	0	38806	116.03	0	35685	106.698	0													10815	32.3368	4.557e-16				37861	113.204	0
23844	71.2936	0													53027	158.551	0	38849	116.159	0	35741	106.866	7.623e-16													10838	32.4056	0				37904	113.333	0
23848	71.3055	0													53119	158.826	0	38862	116.197	0	35761	106.925	0													10849	32.4385	0				37920	113.381	0
23856	71.3294	0													53158	158.942	1.49e-15	38870	116.221	0	35810	107.072	0													10860	32.4714	5.271e-16				37922	113.387	0
23860	71.3414	0													53187	159.029	0	38923	116.38	0	35883	107.29	0													10864	32.4834	2.514e-15				37936	113.429	0
23861	71.3444	0													53238	159.182	0	38978	116.544	0	35889	107.308	0													10872	32.5073	6.041e-15				37938	113.435	0
23883	71.4102	0													53297	159.358	0	39005	116.625	0	35903	107.35	4.546e-16													10881	32.5342	8.335e-15				37985	113.575	0
23886	71.4191	0													53378	159.6	0	39029	116.697	0	35913	107.38	0													10895	32.5761	0				38013	113.659	0
23889	71.4281	0													53391	159.639	0	39035	116.715	0	35997	107.631	0													10898	32.585	4.867e-16				38016	113.668	0
23894	71.4431	0													53430	159.756	0	39051	116.763	0	36017	107.691	0													10904	32.603	0				38044	113.752	0
23900	71.461	0													53476	159.893	0	39085	116.864	0	36080	107.879	1.462e-15													10906	32.6089	0				38058	113.793	0
23902	71.467	0													53493	159.944	0	39141	117.032	0	36101	107.942	0													10910	32.6209	4.031e-15				38147	114.059	0
23906	71.4789	0													53536	160.073	0	39189	117.175	0	36128	108.023	0													10923	32.6598	5.604e-14				38182	114.164	0
23938	71.5746	0													53639	160.381	0	39210	117.238	0	36129	108.026	4.124e-16													10929	32.6777	0				38200	114.218	0
23941	71.5836	0													53655	160.428	0	39255	117.373	0	36200	108.238	0													10932	32.6867	0				38209	114.245	0
23967	71.6613	0													53660	160.443	0	39344	117.639	0	36226	108.316	6.839e-16													10950	32.7405	0				38221	114.281	0
23971	71.6733	0													53699	160.56	0	39382	117.752	0	36244	108.37	1.238e-15													10962	32.7764	0				38338	114.631	0
23982	71.7062	0													53807	160.883	0	39384	117.758	0	36270	108.447	0													10970	32.8003	0				38353	114.675	0
23985	71.7151	0													53845	160.997	0	39397	117.797	0	36300	108.537	0													10971	32.8033	1.878e-15				38369	114.723	0
24005	71.775	0													53858	161.035	0	39422	117.872	0	36323	108.606	4.165e-15													10974	32.8123	5.735e-16				38386	114.774	0
24019	71.8168	0													53955	161.325	0	39438	117.92	0	36324	108.609	0													10983	32.8392	5.072e-16				38398	114.81	0
24020	71.8198	0													54051	161.613	0	39464	117.997	0	36409	108.863	0													11000	32.89	0				38410	114.846	0
24025	71.8347	0													54084	161.711	0	39474	118.027	0	36476	109.063	0													11011	32.9229	0				38495	115.1	0
24029	71.8467	0													54207	162.079	0	39539	118.222	0	36492	109.111	0													11015	32.9348	5.428e-15				38521	115.178	0
24035	71.8646	0													54249	162.204	0	39551	118.257	0	36504	109.147	0													11019	32.9468	4.096e-15				38635	115.519	0
24045	71.8945	0													54324	162.429	0	39596	118.392	0	36531	109.228	9.512e-16													11028	32.9737	1.641e-15				38706	115.731	0
24058	71.9334	0													54423	162.725	0	39659	118.58	0	36557	109.305	0													11029	32.9767	0				38711	115.746	0
24060	71.9394	0													54425	162.731	0	39678	118.637	0	36616	109.482	0													11056	33.0574	0				38750	115.862	0
24065	71.9544	0													54451	162.809	0	39727	118.784	4.991e-16	36681	109.676	0													11062	33.0754	0				38756	115.88	0
24066	71.9573	0													54453	162.815	0	39750	118.853	0	36717	109.784	0													11074	33.1113	4.958e-16				38782	115.958	1.94e-15
24070	71.9693	0													54486	162.913	0	39758	118.876	0	36738	109.847	0													11088	33.1531	1.297e-15				38796	116	0
24099	72.056	0													54548	163.099	0	39910	119.331	0	36778	109.966	0													11092	33.1651	0				38820	116.072	0
24108	72.0829	0													54722	163.619	0	39926	119.379	0	36779	109.969	1.204e-15													11093	33.1681	7.719e-16				38829	116.099	0
24111	72.0919	0													54757	163.723	0	39927	119.382	0	36812	110.068	0													11096	33.177	0				38860	116.191	0
24122	72.1248	0													54786	163.81	0	39975	119.525	0	36842	110.158	0													11108	33.2129	7.659e-16				38908	116.335	0
24133	72.1577	0													54794	163.834	0	40025	119.675	0	36874	110.253	0													11126	33.2667	7.484e-16				38960	116.49	0
24135	72.1637	0													54801	163.855	0	40042	119.726	0	36897	110.322	0													11133	33.2877	0				38973	116.529	0
24158	72.2324	0													54834	163.954	0	40130	119.989	0	36910	110.361	0													11157	33.3594	0				38981	116.553	0
24172	72.2743	0													54871	164.064	0	40193	120.177	0	36915	110.376	0													11160	33.3684	0				38986	116.568	0
24175	72.2832	0													54917	164.202	0	40205	120.213	0	36918	110.385	0													11169	33.3953	2.816e-15				39036	116.718	0
24184	72.3102	0													54918	164.205	0	40241	120.321	4.777e-15	36919	110.388	0													11170	33.3983	0				39044	116.742	0
24197	72.349	0													55052	164.606	0	40248	120.341	0	37042	110.756	0													11173	33.4073	1.277e-15				39048	116.754	0
24202	72.364	0													55064	164.641	0	40288	120.461	0	37118	110.983	0													11177	33.4192	5.754e-15				39110	116.939	0
24221	72.4208	0													55115	164.794	0	40321	120.56	8.849e-16	37151	111.082	0													11181	33.4312	0				39128	116.993	0
24234	72.4597	0													55116	164.797	0	40324	120.569	0	37168	111.132	0													11188	33.4521	0				39202	117.214	0
24238	72.4716	0													55129	164.836	0	40383	120.745	0	37176	111.156	0													11192	33.4641	0				39209	117.235	0
24278	72.5912	0													55159	164.925	0	40444	120.928	9.663e-16	37189	111.195	0													11203	33.497	0				39253	117.367	0
24286	72.6151	0													55167	164.949	0	40470	121.005	7.46e-16	37198	111.222	4.447e-16													11207	33.5089	6.602e-16				39270	117.417	0
24288	72.6211	0													55233	165.147	0	40493	121.074	0	37201	111.231	9.506e-15													11218	33.5418	0				39289	117.474	0
24299	72.654	0													55240	165.168	0	40502	121.101	0	37299	111.524	0													11224	33.5598	1.042e-15				39354	117.668	0
24308	72.6809	0													55247	165.189	0	40534	121.197	0	37316	111.575	0													11249	33.6345	9.32e-16				39358	117.68	0
24335	72.7617	0													55285	165.302	0	40539	121.212	0	37333	111.626	0													11285	33.7422	0				39377	117.737	0
24347	72.7975	0													55333	165.446	0	40600	121.394	0	37384	111.778	0													11294	33.7691	0				39381	117.749	0
24378	72.8902	0													55344	165.479	0	40628	121.478	0	37410	111.856	9.317e-16													11320	33.8468	0				39534	118.207	0
24384	72.9082	0													55351	165.5	0	40665	121.588	0	37490	112.095	0													11337	33.8976	0				39609	118.431	0
24386	72.9141	0													55361	165.529	0	40684	121.645	0	37493	112.104	0													11339	33.9036	1.546e-15				39625	118.479	0
24424	73.0278	0													55367	165.547	0	40696	121.681	0	37542	112.251	0													11348	33.9305	7.716e-16				39651	118.556	0
24434	73.0577	0													55408	165.67	0	40707	121.714	0	37558	112.298	0													11380	34.0262	0				39684	118.655	0
24437	73.0666	0													55415	165.691	0	40713	121.732	0	37579	112.361	0													11383	34.0352	0				39696	118.691	0
24440	73.0756	0													55422	165.712	0	40734	121.795	0	37596	112.412	1.641e-15													11387	34.0471	0				39733	118.802	0
24453	73.1145	0													55456	165.813	0	40743	121.822	0	37597	112.415	0													11401	34.089	0				39763	118.891	0
24465	73.1504	0													55458	165.819	0	40751	121.846	0	37600	112.424	0													11412	34.1219	0				39765	118.897	0
24518	73.3088	0													55481	165.888	0	40807	122.013	0	37733	112.822	1.966e-15													11427	34.1667	1.532e-15				39776	118.93	0
24548	73.3985	0													55490	165.915	0	40810	122.022	0	37771	112.935	0													11431	34.1787	1.564e-14				39783	118.951	0
24577	73.4852	0													55535	166.05	0	40812	122.028	0	37777	112.953	0													11437	34.1966	0				39832	119.098	0
24625	73.6287	0													55554	166.107	0	40853	122.15	0	37804	113.034	0													11440	34.2056	0				39949	119.448	0
24654	73.7155	0													55597	166.235	0	40883	122.24	0	37808	113.046	0													11441	34.2086	7.171e-16				39951	119.454	0
24682	73.7992	0													55618	166.298	0	40894	122.273	0	37816	113.07	0													11455	34.2505	0				40049	119.746	0
24743	73.9816	0													55697	166.534	0	40898	122.285	0	37819	113.079	0													11460	34.2654	0				40058	119.773	0
24806	74.1699	0													55732	166.639	0	40900	122.291	0	37831	113.115	4.191e-16													11467	34.2863	0				40095	119.884	0
24846	74.2895	0													55755	166.707	0	40964	122.482	0	37834	113.124	0													11473	34.3043	1.121e-14				40111	119.932	0
24865	74.3464	0													55764	166.734	0	40991	122.563	0	37846	113.159	0													11477	34.3162	0				40144	120.031	0
24870	74.3613	0													55770	166.752	0	40994	122.572	0	37897	113.312	0													11486	34.3431	0				40211	120.231	0
24884	74.4032	0													55851	166.994	0	41010	122.62	0	37899	113.318	0													11490	34.3551	0				40221	120.261	0
24892	74.4271	0													55911	167.174	0	41020	122.65	0	38016	113.668	0													11491	34.3581	4.49e-16				40244	120.33	0
24908	74.4749	0													55924	167.213	0	41071	122.802	0	38036	113.728	4.193e-15													11495	34.37	5.361e-15				40264	120.389	0
24944	74.5826	0													55952	167.297	0	41087	122.85	9.841e-16	38057	113.79	0													11502	34.391	0				40281	120.44	0
24953	74.6095	0													56108	167.763	0	41227	123.269	0	38081	113.862	1.307e-15													11505	34.3999	4.534e-16				40337	120.608	0
24979	74.6872	0													56114	167.781	0	41230	123.278	0	38124	113.991	0													11509	34.4119	0				40419	120.853	0
25045	74.8846	0													56145	167.874	0	41254	123.35	0	38168	114.122	0													11517	34.4358	2.158e-15				40424	120.868	0
25107	75.0699	0													56151	167.892	0	41304	123.499	0	38277	114.448	0													11518	34.4388	0				40430	120.886	0
25164	75.2404	0													56205	168.053	0	41322	123.553	0	38306	114.535	0													11520	34.4448	6.313e-16				40455	120.96	0
25170	75.2583	0													56272	168.253	0	41341	123.61	0	38309	114.544	0													11531	34.4777	0				40540	121.215	0
25197	75.339	0													56284	168.289	0	41387	123.747	0	38323	114.586	6.425e-16													11532	34.4807	3.441e-15				40553	121.254	0
25258	75.5214	0													56288	168.301	0	41482	124.031	0	38337	114.628	0													11561	34.5674	0				40563	121.283	0
25264	75.5394	0													56301	168.34	0	41484	124.037	0	38341	114.64	0													11564	34.5764	6.912e-16				40569	121.301	0
25285	75.6021	0													56432	168.732	0	41517	124.136	0	38347	114.657	0													11567	34.5853	0				40595	121.379	0
25292	75.6231	0													56455	168.8	0	41557	124.255	0	38371	114.729	0													11603	34.693	0				40602	121.4	0
25300	75.647	0													56475	168.86	0	41585	124.339	0	38376	114.744	0													11605	34.699	7.11e-16				40668	121.597	0
25319	75.7038	0													56557	169.105	0	41627	124.465	0	38401	114.819	0													11612	34.7199	0				40684	121.645	0
25327	75.7277	0													56558	169.108	0	41679	124.62	0	38407	114.837	0													11626	34.7617	7.191e-16				40686	121.651	0
25347	75.7875	0													56599	169.231	0	41697	124.674	0	38409	114.843	0													11627	34.7647	0				40706	121.711	0
25353	75.8055	0													56600	169.234	0	41765	124.877	0	38462	115.001	0													11639	34.8006	2.862e-15				40714	121.735	0
25367	75.8473	0													56629	169.321	0	41786	124.94	0	38464	115.007	0													11645	34.8186	0				40725	121.768	0
25402	75.952	0													56690	169.503	0	41830	125.072	0	38471	115.028	0													11649	34.8305	0				40728	121.777	0
25420	76.0058	0													56693	169.512	0	41884	125.233	0	38482	115.061	0													11656	34.8514	6.101e-16				40787	121.953	0
25423	76.0148	0													56727	169.614	0	41917	125.332	0	38485	115.07	0													11657	34.8544	0				40790	121.962	0
25462	76.1314	0													56867	170.032	0	41927	125.362	0	38512	115.151	0													11659	34.8604	1.503e-15				40802	121.998	0
25467	76.1463	0													56924	170.203	0	41964	125.472	0	38527	115.196	0													11666	34.8813	4.716e-16				40860	122.171	0
25483	76.1942	0													56974	170.352	0	42003	125.589	0	38561	115.297	4.8e-16													11672	34.8993	5.738e-16				40905	122.306	0
25526	76.3227	0													56996	170.418	0	42154	126.04	0	38627	115.495	0													11674	34.9053	0				40984	122.542	0
25564	76.4364	0													56998	170.424	0	42174	126.1	0	38631	115.507	0													11679	34.9202	0				40986	122.548	0
25574	76.4663	0													57088	170.693	0	42190	126.148	2.045e-15	38698	115.707	0													11691	34.9561	0				40991	122.563	0
25610	76.5739	0													57111	170.762	0	42205	126.193	0	38728	115.797	0													11694	34.9651	0				41009	122.617	0
25654	76.7055	0													57160	170.908	0	42211	126.211	8.961e-16	38744	115.845	0													11701	34.986	3.528e-15				41019	122.647	0
25682	76.7892	0													57218	171.082	0	42225	126.253	0	38747	115.853	0													11715	35.0279	5.223e-16				41037	122.701	0
25683	76.7922	0													57241	171.151	0	42228	126.262	0	38751	115.865	0													11718	35.0368	0				41069	122.796	0
25688	76.8071	0													57351	171.48	0	42332	126.573	0	38761	115.895	0													11737	35.0936	1.309e-15				41081	122.832	0
25701	76.846	0													57404	171.638	0	42351	126.629	0	38777	115.943	0													11753	35.1415	0				41083	122.838	0
25709	76.8699	0													57454	171.787	0	42388	126.74	0	38793	115.991	0													11758	35.1564	0				41105	122.904	0
25730	76.9327	0													57472	171.841	0	42405	126.791	6.062e-16	38817	116.063	1.632e-14													11804	35.294	1.812e-15				41130	122.979	0
25734	76.9447	0													57529	172.012	0	42477	127.006	0	38818	116.066	0													11806	35.2999	1.717e-15				41138	123.003	0
25777	77.0732	0													57532	172.021	0	42563	127.263	0	38844	116.144	0													11809	35.3089	1.857e-15				41139	123.006	0
25785	77.0971	0													57539	172.042	0	42618	127.428	6.15e-16	38856	116.179	0													11827	35.3627	0				41149	123.035	0
25808	77.1659	0													57612	172.26	0	42698	127.667	0	38865	116.206	0													11862	35.4674	0				41197	123.179	0
25840	77.2616	0													57635	172.329	0	42730	127.763	0	38890	116.281	0													11865	35.4764	0				41210	123.218	0
25843	77.2706	0													57641	172.347	0	42736	127.781	0	38894	116.293	0													11868	35.4853	1.152e-15				41220	123.248	0
25856	77.3094	0													57692	172.499	0	42737	127.784	0	38907	116.332	7.086e-15													11873	35.5003	4.48e-16				41286	123.445	0
25873	77.3603	0													57774	172.744	0	42877	128.202	0	38926	116.389	0													11896	35.569	8.563e-16				41290	123.457	0
25895	77.4261	0													57781	172.765	0	42936	128.379	0	38941	116.434	0													11899	35.578	0				41319	123.544	0
25937	77.5516	0													57824	172.894	0	43018	128.624	0	38945	116.445	0													11902	35.587	0				41322	123.553	0
25987	77.7011	0													57846	172.959	0	43099	128.866	1.371e-15	38962	116.496	4.942e-16													11915	35.6258	0				41338	123.601	0
26078	77.9732	0													57925	173.196	0	43193	129.147	0	38991	116.583	0													11929	35.6677	0				41353	123.645	0
26094	78.0211	0													57993	173.399	0	43199	129.165	0	39076	116.837	0													11946	35.7185	2.501e-15				41369	123.693	0
26114	78.0809	0													58026	173.498	0	43246	129.305	0	39088	116.873	0													11958	35.7544	6.232e-16				41410	123.816	0
26121	78.1018	0													58040	173.54	0	43483	130.014	0	39126	116.987	3.378e-15													11965	35.7754	4.223e-15				41423	123.855	0
26141	78.1616	0													58065	173.614	0	43580	130.304	0	39182	117.154	0													11969	35.7873	0				41484	124.037	0
26160	78.2184	0													58154	173.881	0	43588	130.328	0	39188	117.172	0													11972	35.7963	1.043e-15				41507	124.106	0
26171	78.2513	0													58184	173.97	0	43608	130.388	0	39206	117.226	0													11973	35.7993	0				41536	124.193	0
26179	78.2752	0													58196	174.006	0	43642	130.49	0	39232	117.304	0													11974	35.8023	9.757e-16				41594	124.366	2.425e-15
26186	78.2961	0													58203	174.027	0	43739	130.78	0	39276	117.435	0													11992	35.8561	0				41639	124.501	0
26262	78.5234	0													58243	174.147	0	43742	130.789	0	39287	117.468	0													12002	35.886	0				41651	124.537	0
26291	78.6101	0													58409	174.643	0	43788	130.926	0	39326	117.585	0													12008	35.9039	2.7e-14				41720	124.743	0
26318	78.6908	0													58455	174.78	0	43797	130.953	0	39396	117.794	0													12011	35.9129	1.233e-15				41727	124.764	0
26327	78.7177	0													58649	175.361	0	43813	131.001	0	39424	117.878	3.768e-16													12014	35.9219	4.404e-16				41744	124.815	0
26346	78.7745	0													58740	175.633	0	43861	131.144	0	39442	117.932	0													12022	35.9458	0				41760	124.862	0
26364	78.8284	0													58810	175.842	0	43900	131.261	0	39454	117.968	0													12024	35.9518	0				41780	124.922	0
26380	78.8762	0													58864	176.003	0	43908	131.285	0	39478	118.039	0													12032	35.9757	7.362e-15				41799	124.979	0
26388	78.9001	0													58919	176.168	0	43920	131.321	0	39485	118.06	0													12044	36.0116	0				41813	125.021	1.244e-15
26391	78.9091	0													58931	176.204	0	44008	131.584	0	39632	118.5	4.542e-16													12048	36.0235	0				41818	125.036	0
26441	79.0586	0													58977	176.341	0	44068	131.763	0	39688	118.667	1.396e-14													12049	36.0265	4.77e-16				41864	125.173	0
26445	79.0705	0													59016	176.458	0	44081	131.802	0	39698	118.697	0													12059	36.0564	0				41866	125.179	0
26455	79.1004	0													59029	176.497	0	44088	131.823	0	39705	118.718	0													12072	36.0953	0				41881	125.224	0
26457	79.1064	0													59065	176.604	0	44093	131.838	0	39709	118.73	0													12075	36.1043	6.99e-16				41912	125.317	0
26460	79.1154	0													59068	176.613	0	44097	131.85	0	39767	118.903	0													12081	36.1222	6.348e-16				41919	125.338	0
26466	79.1333	0													59111	176.742	0	44099	131.856	0	39772	118.918	0													12094	36.1611	8.628e-16				41944	125.413	1.101e-15
26469	79.1423	0													59151	176.862	0	44103	131.868	0	39820	119.062	0													12106	36.1969	0				41945	125.415	0
26473	79.1543	0													59205	177.023	0	44126	131.937	0	39825	119.077	0													12108	36.2029	5.22e-15				41995	125.565	0
26486	79.1931	0													59261	177.19	0	44138	131.973	0	39855	119.166	0													12109	36.2059	0				42020	125.64	0
26488	79.1991	0													59279	177.244	0	44186	132.116	0	39867	119.202	0													12117	36.2298	0				42023	125.649	0
26495	79.2201	0													59317	177.358	0	44226	132.236	0	39900	119.301	0													12118	36.2328	3.474e-15				42033	125.679	0
26502	79.241	0													59350	177.457	0	44251	132.31	0	39985	119.555	0													12122	36.2448	0				42044	125.712	0
26507	79.2559	0													59403	177.615	0	44262	132.343	0	40019	119.657	2.336e-15													12135	36.2837	3.977e-16				42046	125.718	0
26517	79.2858	0													59447	177.746	0	44276	132.385	0	40044	119.732	0													12144	36.3106	8.31e-15				42061	125.762	0
26530	79.3247	0													59448	177.75	0	44288	132.421	0	40056	119.767	0													12163	36.3674	0				42095	125.864	0
26532	79.3307	0													59496	177.893	0	44293	132.436	0	40080	119.839	0													12168	36.3823	0				42096	125.867	0
26560	79.4144	0													59521	177.968	0	44299	132.454	0	40118	119.953	0													12203	36.487	0				42115	125.924	0
26579	79.4712	0													59600	178.204	0	44319	132.514	0	40155	120.064	0													12207	36.4989	2.877e-15				42142	126.005	0
26592	79.5101	0													59615	178.249	0	44502	133.061	0	40157	120.069	0													12221	36.5408	4.192e-16				42149	126.025	0
26596	79.522	0													59655	178.368	0	44527	133.136	0	40168	120.102	0													12222	36.5438	0				42168	126.082	0
26600	79.534	0													59729	178.59	0	44533	133.154	0	40180	120.138	0													12252	36.6335	7.75e-16				42172	126.094	0
26608	79.5579	0													59730	178.593	0	44567	133.255	0	40185	120.153	1.042e-15													12268	36.6813	0				42190	126.148	0
26609	79.5609	0													59755	178.667	0	44661	133.536	0	40209	120.225	0													12272	36.6933	7.917e-15				42233	126.277	0
26622	79.5998	0													59759	178.679	0	44744	133.785	0	40234	120.3	0													12275	36.7022	0				42251	126.331	0
26646	79.6715	0													59796	178.79	0	44774	133.874	0	40260	120.377	0													12287	36.7381	0				42271	126.39	0
26654	79.6955	0													59920	179.161	0	44797	133.943	0	40266	120.395	7.782e-15													12290	36.7471	0				42304	126.489	0
26663	79.7224	0													59954	179.262	0	44850	134.101	0	40290	120.467	0													12291	36.7501	1.187e-15				42364	126.668	0
26670	79.7433	0													60037	179.511	0	44872	134.167	0	40298	120.491	0													12298	36.771	0				42393	126.755	0
26672	79.7493	0													60058	179.573	0	44917	134.302	0	40338	120.611	0													12304	36.789	0				42396	126.764	0
26688	79.7971	0													60191	179.971	0	44931	134.344	0	40360	120.676	5.551e-16													12308	36.8009	0				42402	126.782	0
26696	79.821	0													60217	180.049	0	45025	134.625	0	40397	120.787	0													12313	36.8159	0				42462	126.961	0
26710	79.8629	0													60251	180.15	0	45049	134.696	0	40423	120.865	0													12334	36.8787	4.293e-16				42552	127.231	0
26711	79.8659	0													60279	180.234	0	45085	134.804	0	40427	120.877	0													12354	36.9385	6.852e-16				42583	127.323	0
26740	79.9526	0													60305	180.312	0	45106	134.867	1.796e-15	40434	120.898	7.792e-16													12356	36.9444	4.347e-16				42592	127.35	0
26754	79.9945	0													60375	180.521	0	45128	134.933	0	40450	120.945	0													12360	36.9564	1.476e-15				42596	127.362	0
26759	80.0094	0																45181	135.091	0	40452	120.951	8.881e-15													12375	37.0012	0				42614	127.416	0
26774	80.0543	0																45204	135.16	0	40474	121.017	1.316e-15													12378	37.0102	0				42638	127.488	0
26777	80.0632	0																45233	135.247	0	40493	121.074	0													12382	37.0222	0				42695	127.658	0
26800	80.132	0																45278	135.381	0	40508	121.119	1.126e-15													12390	37.0461	1.369e-15				42777	127.903	0
26876	80.3592	0																45284	135.399	0	40571	121.307	0													12398	37.07	0				42813	128.011	0
26878	80.3652	0																45287	135.408	0	40594	121.376	0													12409	37.1029	0				42834	128.074	0
26896	80.419	0																45319	135.504	0	40658	121.567	9.083e-15													12420	37.1358	5.087e-16				42851	128.125	0
26907	80.4519	0																45342	135.573	0	40669	121.6	1.162e-14													12436	37.1836	0				42871	128.184	0
26918	80.4848	0																45439	135.863	0	40687	121.654	0													12443	37.2046	2.791e-15				42883	128.22	0
26941	80.5536	0																45452	135.901	0	40770	121.902	0													12445	37.2105	4.064e-16				42993	128.549	0
26948	80.5745	0																45467	135.946	0	40810	122.022	0													12448	37.2195	1.584e-15				43002	128.576	0
26964	80.6224	0																45554	136.207	0	40841	122.115	0													12456	37.2434	0				43019	128.627	0
26970	80.6403	0																45607	136.365	1.684e-15	40968	122.494	0													12465	37.2704	0				43062	128.755	0
26979	80.6672	0																45629	136.431	0	40981	122.533	0													12481	37.3182	0				43104	128.881	0
26982	80.6762	0																45638	136.458	0	40982	122.536	0													12487	37.3361	0				43179	129.105	0
27000	80.73	0																45720	136.703	0	40984	122.542	0													12497	37.366	0				43246	129.305	0
27051	80.8825	0																45736	136.751	0	40989	122.557	0													12500	37.375	0				43275	129.392	0
27053	80.8885	0																45775	136.867	0	41013	122.629	0													12503	37.384	1.167e-15				43340	129.587	0
27055	80.8945	0																45776	136.87	0	41042	122.716	0													12527	37.4557	1.226e-15				43344	129.599	0
27117	81.0798	0																45778	136.876	0	41071	122.802	5.141e-16													12529	37.4617	0				43409	129.793	0
27122	81.0948	0																45782	136.888	0	41083	122.838	0													12536	37.4826	8.141e-16				43415	129.811	0
27123	81.0978	0																45818	136.996	0	41160	123.068	0													12542	37.5006	0				43443	129.895	0
27167	81.2293	0																45845	137.077	0	41172	123.104	0													12544	37.5066	6.13e-15				43519	130.122	0
27174	81.2503	0																45917	137.292	0	41191	123.161	0													12548	37.5185	0				43521	130.128	5.125e-15
27181	81.2712	0																45919	137.298	2.624e-14	41330	123.577	0													12554	37.5365	2.488e-15				43561	130.247	0
27218	81.3818	0																45949	137.387	0	41356	123.654	0													12556	37.5424	0				43623	130.433	0
27237	81.4386	0																45954	137.403	0	41363	123.675	1.566e-15													12559	37.5514	0				43654	130.525	0
27249	81.4745	0																45991	137.513	0	41456	123.953	0													12562	37.5604	0				43662	130.549	0
27284	81.5792	0																46057	137.71	0	41474	124.007	0													12567	37.5753	0				43673	130.582	0
27316	81.6748	0																46060	137.719	0	41482	124.031	0													12576	37.6022	1.151e-15				43712	130.699	0
27357	81.7974	0																46067	137.74	0	41489	124.052	0													12596	37.662	0				43722	130.729	0
27360	81.8064	0																46117	137.89	0	41509	124.112	6.772e-16													12603	37.683	4.421e-16				43727	130.744	0
27390	81.8961	0																46145	137.974	0	41534	124.187	1.372e-15													12616	37.7218	0				43781	130.905	0
27421	81.9888	0																46156	138.006	0	41622	124.45	4.539e-16													12621	37.7368	0				43788	130.926	0
27429	82.0127	0																46177	138.069	0	41647	124.525	0													12624	37.7458	1.951e-14				43807	130.983	0
27439	82.0426	0																46275	138.362	0	41674	124.605	0													12630	37.7637	0				43821	131.025	0
27455	82.0905	0																46289	138.404	0	41685	124.638	0													12644	37.8056	1.15e-15				43854	131.124	0
27477	82.1562	0																46365	138.631	0	41691	124.656	8.098e-16													12652	37.8295	1.385e-15				43865	131.156	0
27495	82.21	0																46377	138.667	0	41800	124.982	0													12657	37.8444	1.049e-15				43950	131.411	0
27513	82.2639	0																46400	138.736	0	41836	125.09	0													12675	37.8982	0				43982	131.506	0
27524	82.2968	0																46407	138.757	0	41852	125.138	5.8e-16													12685	37.9282	1.305e-15				43989	131.527	0
27555	82.3894	0																46499	139.032	0	41857	125.152	1.554e-15													12691	37.9461	0				44033	131.659	0
27607	82.5449	0																46520	139.095	0	41906	125.299	0													12695	37.9581	1.346e-15				44037	131.671	0
27659	82.7004	0																46593	139.313	0	41930	125.371	0													12708	37.9969	0				44051	131.713	0
27749	82.9695	0																46599	139.331	0	41936	125.389	0													12711	38.0059	8.305e-15				44113	131.898	0
27765	83.0174	0																46822	139.998	0	41975	125.505	0													12717	38.0238	0				44221	132.221	6.148e-16
27785	83.0772	0																46826	140.01	0	42064	125.771	0													12719	38.0298	5.076e-16				44228	132.242	0
27805	83.1369	0																46843	140.061	0	42229	126.265	0													12734	38.0747	0				44238	132.272	0
27861	83.3044	0																46901	140.234	0	42233	126.277	0													12736	38.0806	0				44283	132.406	0
27865	83.3163	0																47028	140.614	0	42239	126.295	0													12739	38.0896	0				44332	132.553	0
27911	83.4539	0																47034	140.632	0	42243	126.307	0													12747	38.1135	0				44379	132.693	0
27925	83.4958	0																47053	140.689	0	42248	126.322	9.771e-15													12750	38.1225	0				44382	132.702	0
27937	83.5316	0																47097	140.82	7.077e-16	42275	126.402	0													12759	38.1494	1.409e-15				44499	133.052	0
28016	83.7678	0																47113	140.868	0	42288	126.441	0													12769	38.1793	6.21e-16				44511	133.088	0
28034	83.8217	0																47117	140.88	0	42309	126.504	0													12780	38.2122	6.318e-16				44554	133.216	0
28055	83.8845	0																47118	140.883	0	42343	126.606	0													12810	38.3019	2.291e-15				44556	133.222	0
28068	83.9233	0																47140	140.949	0	42346	126.615	2.608e-15													12821	38.3348	4.582e-16				44601	133.357	4.793e-16
28073	83.9383	0																47194	141.11	0	42428	126.86	0													12826	38.3497	8.423e-16				44606	133.372	0
28080	83.9592	0																47211	141.161	0	42467	126.976	8.174e-16													12829	38.3587	0				44659	133.53	0
28133	84.1177	0																47311	141.46	0	42523	127.144	0													12832	38.3677	0				44684	133.605	0
28147	84.1595	0																47348	141.571	0	42534	127.177	0													12834	38.3737	0				44725	133.728	0
28174	84.2403	0																47381	141.669	0	42562	127.26	8.467e-15													12848	38.4155	1.584e-15				44730	133.743	0
28211	84.3509	0																47479	141.962	0	42578	127.308	5.483e-16													12850	38.4215	0				44745	133.788	0
28361	84.7994	0																47542	142.151	0	42615	127.419	0													12854	38.4335	4.745e-15				44753	133.811	0
28370	84.8263	0																47597	142.315	0	42625	127.449	0													12855	38.4365	0				44784	133.904	0
28392	84.8921	0																47616	142.372	0	42696	127.661	0													12858	38.4454	0				44794	133.934	0
28405	84.9309	0																47619	142.381	0	42697	127.664	0													12863	38.4604	1.024e-14				44813	133.991	0
28418	84.9698	0																47638	142.438	0	42741	127.796	0													12868	38.4753	0				44817	134.003	0
28449	85.0625	0																47661	142.506	0	42844	128.104	0													12873	38.4903	5.964e-16				44824	134.024	0
28465	85.1103	0																47672	142.539	6.186e-16	42871	128.184	0													12878	38.5052	0				44848	134.095	0
28467	85.1163	0																47701	142.626	0	42874	128.193	0													12884	38.5232	0				44912	134.287	0
28476	85.1432	0																47735	142.728	0	42892	128.247	0													12885	38.5262	1.967e-15				45055	134.714	0
28545	85.3496	0																47750	142.773	0	42905	128.286	0													12891	38.5441	1.213e-15				45075	134.774	0
28594	85.4961	0																47775	142.847	0	42910	128.301	0													12897	38.562	0				45117	134.9	0
28610	85.5439	0																47778	142.856	0	42916	128.319	0													12907	38.5919	0				45123	134.918	0
28618	85.5678	0																47785	142.877	0	42921	128.334	0													12912	38.6069	0				45164	135.04	0
28626	85.5917	0																47791	142.895	0	42923	128.34	0													12925	38.6457	0				45233	135.247	0
28672	85.7293	0																47848	143.065	0	42929	128.358	1.166e-15													12926	38.6487	2.319e-15				45249	135.294	0
28674	85.7353	0																47868	143.125	0	42940	128.391	0													12928	38.6547	0				45259	135.324	0
28718	85.8668	0																47870	143.131	0	42943	128.4	0													12933	38.6697	0				45295	135.432	0
28745	85.9476	0																47893	143.2	0	42988	128.534	0													12942	38.6966	0				45314	135.489	8.755e-16
28795	86.097	0																48037	143.631	0	42991	128.543	0													12945	38.7056	0				45358	135.62	0
28806	86.1299	0																48058	143.693	0	42993	128.549	0													12959	38.7474	0				45360	135.626	0
28812	86.1479	0																48149	143.965	0	43029	128.657	4.316e-16													12966	38.7683	0				45368	135.65	0
28816	86.1598	0																48169	144.025	0	43046	128.708	0													12989	38.8371	0				45379	135.683	0
28826	86.1897	0																48197	144.109	0	43090	128.839	0													12991	38.8431	0				45400	135.746	0
28827	86.1927	0																48213	144.157	0	43099	128.866	0													12995	38.855	0				45450	135.895	0
28846	86.2495	0																48220	144.178	0	43106	128.887	0													13000	38.87	7.572e-16				45483	135.994	0
28854	86.2735	0																48224	144.19	0	43110	128.899	0													13011	38.9029	7.175e-16				45528	136.129	0
28865	86.3063	0																48234	144.22	0	43115	128.914	6.238e-15													13014	38.9119	0				45600	136.344	0
28872	86.3273	0																48277	144.348	0	43138	128.983	0													13022	38.9358	7.69e-16				45644	136.476	0
28893	86.3901	0																48301	144.42	0	43155	129.033	0													13024	38.9418	1.456e-15				45714	136.685	0
28895	86.3961	0																48323	144.486	0	43173	129.087	0													13031	38.9627	6.368e-16				45725	136.718	0
28902	86.417	0																48359	144.593	0	43177	129.099	0													13035	38.9747	0				45755	136.807	0
28910	86.4409	0																48361	144.599	0	43205	129.183	0													13039	38.9866	0				45765	136.837	0
28923	86.4798	0																48366	144.614	0	43268	129.371	0													13040	38.9896	2.708e-15				45781	136.885	0
28925	86.4857	0																48384	144.668	0	43272	129.383	0													13043	38.9986	3.365e-15				45814	136.984	0
28927	86.4917	0																48403	144.725	0	43481	130.008	2.061e-15													13045	39.0046	7.37e-15				45816	136.99	0
28932	86.5067	0																48413	144.755	0	43492	130.041	0													13061	39.0524	6.311e-16				45844	137.074	0
28936	86.5186	0																48432	144.812	0	43528	130.149	0													13069	39.0763	6.6e-16				45848	137.085	0
28951	86.5635	0																48454	144.877	0	43601	130.367	5.803e-16													13085	39.1242	0				45862	137.127	0
28985	86.6651	0																48459	144.892	0	43633	130.463	0													13091	39.1421	0				45864	137.133	0
29007	86.7309	0																48478	144.949	0	43651	130.517	0													13095	39.154	2.294e-15				45909	137.268	0
29016	86.7578	0																48530	145.105	0	43672	130.579	0													13096	39.157	0				45916	137.289	0
29022	86.7758	0																48534	145.117	0	43685	130.618	0													13108	39.1929	0				45937	137.352	0
29038	86.8236	0																48603	145.323	0	43694	130.645	5.73e-15													13111	39.2019	0				46017	137.591	4.198e-16
29056	86.8774	0																48637	145.425	0	43696	130.651	0													13121	39.2318	1.067e-15				46025	137.615	5.386e-16
29057	86.8804	0																48674	145.535	0	43737	130.774	4.256e-16													13123	39.2378	0				46055	137.704	0
29085	86.9642	0																48688	145.577	0	43768	130.866	0													13130	39.2587	0				46090	137.809	0
29110	87.0389	0																48724	145.685	0	43792	130.938	0													13132	39.2647	1.015e-15				46207	138.159	0
29111	87.0419	0																48766	145.81	0	43820	131.022	0													13136	39.2766	0				46212	138.174	0
29115	87.0538	0																48769	145.819	0	43826	131.04	0													13142	39.2946	0				46218	138.192	5.54e-16
29123	87.0778	0																48780	145.852	0	43837	131.073	0													13143	39.2976	6.496e-16				46226	138.216	0
29130	87.0987	0																48786	145.87	0	43943	131.39	0													13155	39.3334	1.883e-15				46283	138.386	0
29140	87.1286	0																48893	146.19	0	43977	131.491	0													13163	39.3574	0				46290	138.407	0
29158	87.1824	0																48903	146.22	0	44065	131.754	0													13169	39.3753	6.486e-16				46308	138.461	0
29166	87.2063	0																48909	146.238	2.82e-15	44078	131.793	6.9e-15													13170	39.3783	0				46341	138.56	0
29170	87.2183	0																48918	146.265	0	44134	131.961	0													13186	39.4261	3.139e-15				46343	138.566	0
29186	87.2661	0																48925	146.286	0	44136	131.967	0													13188	39.4321	9.489e-16				46350	138.587	0
29190	87.2781	0																49039	146.627	0	44191	132.131	3.624e-15													13191	39.4411	0				46392	138.712	0
29203	87.317	0																49058	146.683	0	44207	132.179	0													13209	39.4949	0				46417	138.787	0
29217	87.3588	0																49060	146.689	0	44215	132.203	0													13211	39.5009	1.239e-14				46427	138.817	0
29219	87.3648	0																49068	146.713	0	44235	132.263	0													13214	39.5099	2.345e-15				46431	138.829	0
29234	87.4097	0																49076	146.737	0	44237	132.269	0													13224	39.5398	4.596e-16				46456	138.903	0
29240	87.4276	0																49124	146.881	0	44260	132.337	0													13225	39.5427	0				46479	138.972	0
29256	87.4754	0																49144	146.941	0	44263	132.346	0													13227	39.5487	4.448e-16				46581	139.277	0
29262	87.4934	0																49157	146.979	0	44289	132.424	0													13233	39.5667	0				46605	139.349	0
29277	87.5382	0																49166	147.006	0	44341	132.58	8.591e-16													13242	39.5936	0				46637	139.445	0
29278	87.5412	0																49176	147.036	0	44346	132.595	0													13248	39.6115	0				46692	139.609	0
29293	87.5861	0																49183	147.057	0	44367	132.657	0													13253	39.6265	0				46864	140.123	0
29331	87.6997	0																49211	147.141	0	44369	132.663	0													13257	39.6384	1.737e-15				46920	140.291	0
29338	87.7206	0																49219	147.165	0	44384	132.708	0													13261	39.6504	4.889e-15				46957	140.401	0
29341	87.7296	0																49252	147.263	0	44412	132.792	0													13293	39.7461	5.508e-15				46962	140.416	0
29353	87.7655	0																49278	147.341	0	44417	132.807	5.841e-16													13311	39.7999	1.923e-15				46969	140.437	0
29361	87.7894	0																49297	147.398	0	44422	132.822	0													13327	39.8477	2.487e-15				47040	140.65	0
29379	87.8432	0																49304	147.419	0	44541	133.178	1.397e-15													13348	39.9105	1.838e-15				47064	140.721	0
29388	87.8701	0																49306	147.425	0	44556	133.222	1.927e-15													13363	39.9554	0				47134	140.931	0
29390	87.8761	0																49331	147.5	0	44557	133.225	0													13371	39.9793	4.333e-16				47179	141.065	0
29409	87.9329	0																49334	147.509	0	44559	133.231	0													13379	40.0032	0				47227	141.209	0
29420	87.9658	0																49338	147.521	0	44564	133.246	2.591e-15													13390	40.0361	0				47298	141.421	0
29523	88.2738	0																49408	147.73	0	44630	133.444	0													13392	40.0421	3.946e-16				47313	141.466	0
29536	88.3126	0																49414	147.748	0	44660	133.533	0													13400	40.066	0				47323	141.496	0
29540	88.3246	0																49445	147.841	0	44665	133.548	0													13406	40.0839	0				47357	141.597	0
29586	88.4621	0																49482	147.951	0	44788	133.916	0													13418	40.1198	0				47369	141.633	0
29592	88.4801	0																49558	148.178	0	44795	133.937	0													13428	40.1497	0				47399	141.723	0
29606	88.5219	0																49594	148.286	0	44814	133.994	0													13435	40.1707	2.64e-15				47402	141.732	0
29665	88.6984	0																49647	148.445	0	44838	134.066	0													13450	40.2155	2.581e-15				47405	141.741	0
29689	88.7701	0																49655	148.468	0	44871	134.164	0													13458	40.2394	0				47413	141.765	0
29709	88.8299	0																49679	148.54	0	44947	134.392	1.94e-15													13464	40.2574	0				47418	141.78	0
29715	88.8478	0																49690	148.573	0	45030	134.64	0													13471	40.2783	8.914e-16				47559	142.201	1.519e-15
29743	88.9316	0																49783	148.851	0	45033	134.649	0													13482	40.3112	0				47608	142.348	0
29764	88.9944	0																49835	149.007	0	45042	134.676	0													13493	40.3441	0				47623	142.393	0
29852	89.2575	0																49839	149.019	0	45047	134.69	0													13496	40.353	2.718e-15				47661	142.506	0
29865	89.2964	0																49852	149.058	0	45129	134.936	0													13498	40.359	2.864e-15				47678	142.557	0
29868	89.3053	0																49947	149.341	0	45138	134.963	0													13501	40.368	7.21e-16				47683	142.572	0
29891	89.3741	0																49991	149.473	1.073e-15	45147	134.989	0													13502	40.371	0				47704	142.635	0
29946	89.5385	0																50041	149.623	0	45150	134.999	0													13518	40.4188	0				47726	142.701	0
29986	89.6581	0																50095	149.784	0	45167	135.049	0													13536	40.4726	4.313e-15				47742	142.749	0
29994	89.6821	1.641e-15																50194	150.08	0	45170	135.058	0													13539	40.4816	0				47851	143.075	0
30021	89.7628	0																50214	150.14	0	45177	135.079	0													13553	40.5235	4.192e-16				47936	143.329	0
30023	89.7688	0																50216	150.146	0	45184	135.1	0													13557	40.5354	4.205e-16				47946	143.358	0
30070	89.9093	0																50235	150.203	0	45188	135.112	0													13562	40.5504	4.37e-16				47995	143.505	0
30079	89.9362	0																50240	150.218	0	45223	135.217	7.169e-16													13566	40.5623	1.03e-15				48045	143.655	0
30080	89.9392	0																50251	150.25	0	45228	135.232	0													13572	40.5803	0				48161	144.001	0
30112	90.0349	0																50337	150.508	0	45268	135.351	0													13578	40.5982	0				48197	144.109	0
30138	90.1126	0																50341	150.52	0	45324	135.519	0													13580	40.6042	3.792e-16				48241	144.241	0
30149	90.1455	0																50403	150.705	0	45337	135.558	0													13582	40.6102	4.461e-16				48289	144.384	6.145e-16
30159	90.1754	0																50428	150.78	0	45374	135.668	2.894e-15													13596	40.652	0				48334	144.519	0
30165	90.1933	0																50455	150.861	0	45406	135.764	1.95e-15													13616	40.7118	0				48345	144.552	0
30177	90.2292	0																50467	150.896	0	45429	135.833	0													13625	40.7388	0				48350	144.566	0
30203	90.307	0																50479	150.932	0	45449	135.893	0													13635	40.7687	4.039e-15				48431	144.809	0
30206	90.3159	8.302e-15																50483	150.944	0	45458	135.919	0													13637	40.7746	4.495e-16				48468	144.919	5.94e-16
30227	90.3787	0																50502	151.001	0	45505	136.06	1.367e-15													13642	40.7896	4.777e-16				48470	144.925	0
30250	90.4475	0																50557	151.165	0	45511	136.078	0													13645	40.7985	6.953e-16				48473	144.934	0
30258	90.4714	0																50579	151.231	0	45512	136.081	4.432e-16													13651	40.8165	6.566e-16				48475	144.94	0
30289	90.5641	0																50624	151.366	0	45591	136.317	5.628e-15													13661	40.8464	0				48500	145.015	0
30294	90.5791	0																50627	151.375	0	45602	136.35	0													13666	40.8613	9.745e-16				48532	145.111	0
30316	90.6448	0																50652	151.45	0	45641	136.467	0													13668	40.8673	0				48535	145.12	0
30333	90.6957	0																50730	151.683	0	45717	136.694	0													13670	40.8733	0				48555	145.179	1.456e-14
30342	90.7226	0																50826	151.97	0	45736	136.751	0													13674	40.8853	5.981e-16				48565	145.209	0
30344	90.7286	0																50885	152.146	0	45745	136.778	0													13684	40.9152	8.665e-16				48629	145.401	0
30358	90.7704	0																50973	152.409	0	45748	136.786	0													13687	40.9241	0				48648	145.458	0
30374	90.8183	0																51002	152.496	0	45765	136.837	0													13689	40.9301	0				48695	145.598	0
30378	90.8302	0																51011	152.523	0	45794	136.924	4.004e-16													13697	40.954	0				48736	145.721	0
30387	90.8571	0																51028	152.574	0	45801	136.945	0													13731	41.0557	0				48747	145.754	0
30389	90.8631	0																51053	152.649	0	45823	137.011	0													13738	41.0766	5.732e-16				48766	145.81	0
30416	90.9438	0																51055	152.654	0	45837	137.053	0													13745	41.0975	7.058e-16				48785	145.867	0
30447	91.0365	0																51068	152.693	0	45897	137.232	0													13763	41.1514	0				48789	145.879	0
30473	91.1143	0																51075	152.714	0	46021	137.603	0													13787	41.2231	0				48790	145.882	0
30501	91.198	0																51105	152.804	0	46026	137.618	0													13792	41.2381	5.241e-16				48805	145.927	0
30506	91.2129	0																51108	152.813	0	46054	137.702	0													13810	41.2919	0				48816	145.96	0
30511	91.2279	0																51125	152.864	0	46071	137.752	0													13826	41.3397	8.107e-16				48820	145.972	0
30535	91.2996	0																51154	152.951	0	46085	137.794	0													13831	41.3547	0				48869	146.118	0
30567	91.3953	0																51205	153.103	0	46087	137.8	1.211e-15													13839	41.3786	5.124e-16				48883	146.16	0
30607	91.5149	0																51218	153.142	0	46126	137.917	0													13844	41.3936	0				48957	146.381	0
30620	91.5538	0																51223	153.157	0	46133	137.938	0													13857	41.4324	1.463e-15				48987	146.471	0
30644	91.6256	0																51236	153.196	0	46136	137.947	0													13872	41.4773	6.219e-15				49043	146.639	0
30674	91.7153	0																51256	153.255	0	46155	138.004	0													13874	41.4833	3.828e-15				49053	146.668	0
30678	91.7272	0																51265	153.282	0	46199	138.135	0													13878	41.4952	7.784e-16				49085	146.764	0
30735	91.8976	0																51363	153.575	0	46239	138.255	7.556e-16													13885	41.5162	9.382e-16				49089	146.776	0
30773	92.0113	0																51381	153.629	0	46259	138.314	0													13899	41.558	1.618e-15				49105	146.824	0
30791	92.0651	0																51387	153.647	0	46274	138.359	0													13902	41.567	0				49141	146.932	0
30801	92.095	0																51395	153.671	0	46328	138.521	0													13911	41.5939	5.615e-16				49216	147.156	0
30811	92.1249	0																51429	153.773	0	46340	138.557	0													13916	41.6088	0				49309	147.434	0
30823	92.1608	0																51450	153.835	0	46392	138.712	0													13919	41.6178	0				49367	147.607	0
30833	92.1907	0																51460	153.865	0	46400	138.736	0													13927	41.6417	5.547e-16				49388	147.67	7.561e-16
30854	92.2535	0																51476	153.913	0	46414	138.778	0													13964	41.7524	1.268e-15				49467	147.906	0
30905	92.406	0																51494	153.967	0	46464	138.927	0													13969	41.7673	0				49505	148.02	0
30924	92.4628	0																51520	154.045	0	46473	138.954	0													13980	41.8002	0				49507	148.026	0
30927	92.4717	0																51545	154.12	0	46476	138.963	0													13984	41.8122	1.027e-15				49548	148.149	0
30938	92.5046	0																51662	154.469	0	46478	138.969	6.016e-16													14000	41.86	0				49588	148.268	0
30949	92.5375	0																51714	154.625	0	46496	139.023	0													14017	41.9108	0				49604	148.316	0
30952	92.5465	0																51744	154.715	0	46547	139.175	0													14027	41.9407	2.195e-15				49619	148.361	0
30963	92.5794	0																51791	154.855	5.555e-16	46563	139.223	0													14047	42.0005	0				49633	148.403	0
30968	92.5943	0																51803	154.891	0	46633	139.433	1.319e-15													14053	42.0185	0				49643	148.433	0
31049	92.8365	0																51820	154.942	0	46635	139.439	0													14082	42.1052	0				49657	148.474	0
31123	93.0578	0																51876	155.109	0	46680	139.573	0													14083	42.1082	2.58e-14				49690	148.573	0
31132	93.0847	0																51877	155.112	0	46711	139.666	0													14102	42.165	0				49712	148.639	0
31172	93.2043	0																51892	155.157	0	46727	139.714	5.343e-16													14111	42.1919	5.323e-15				49739	148.72	0
31199	93.285	0																51963	155.369	0	46735	139.738	0													14115	42.2039	0				49745	148.738	0
31204	93.3	0																52038	155.594	0	46741	139.756	0													14118	42.2128	1.858e-15				49763	148.791	0
31213	93.3269	0																52062	155.665	0	46755	139.797	0													14127	42.2397	5.262e-16				49769	148.809	0
31221	93.3508	0																52082	155.725	0	46795	139.917	0													14147	42.2995	0				49873	149.12	8.072e-16
31230	93.3777	0																52108	155.803	0	46819	139.989	0													14152	42.3145	1.822e-15				49920	149.261	0
31286	93.5451	0																52126	155.857	0	46820	139.992	0													14160	42.3384	2.445e-15				49959	149.377	0
31345	93.7216	0																52162	155.964	0	46851	140.084	0													14164	42.3504	0				49983	149.449	0
31361	93.7694	0																52165	155.973	0	46858	140.105	0													14167	42.3593	0				50066	149.697	0
31364	93.7784	0																52204	156.09	4.483e-16	46861	140.114	0													14173	42.3773	0				50069	149.706	0
31444	94.0176	0																52240	156.198	0	46866	140.129	2.11e-15													14212	42.4939	0				50113	149.838	0
31446	94.0235	0																52247	156.219	0	46876	140.159	0													14216	42.5058	0				50150	149.948	0
31490	94.1551	0																52268	156.281	0	46995	140.515	2.143e-15													14233	42.5567	0				50257	150.268	0
31495	94.1701	0																52272	156.293	0	47023	140.599	0													14234	42.5597	0				50272	150.313	0
31505	94.2	0																52362	156.562	0	47072	140.745	0													14278	42.6912	0				50283	150.346	0
31507	94.2059	0																52405	156.691	0	47133	140.928	0													14281	42.7002	1.145e-15				50327	150.478	0
31519	94.2418	0																52410	156.706	0	47200	141.128	0													14287	42.7181	1.524e-15				50345	150.532	0
31536	94.2926	0																52449	156.822	0	47244	141.26	0													14310	42.7869	0				50396	150.684	0
31558	94.3584	0																52501	156.978	0	47255	141.292	0													14319	42.8138	0				50443	150.825	0
31566	94.3823	0																52519	157.032	0	47306	141.445	6.537e-16													14322	42.8228	0				50449	150.843	0
31597	94.475	0																52573	157.193	0	47348	141.571	0													14324	42.8288	1.834e-15				50456	150.863	0
31604	94.496	0																52647	157.415	0	47388	141.69	0													14327	42.8377	0				50487	150.956	0
31618	94.5378	0																52832	157.968	0	47416	141.774	0													14366	42.9543	6.051e-14				50544	151.127	0
31622	94.5498	0																52835	157.977	0	47422	141.792	0													14371	42.9693	1.352e-15				50551	151.148	0
31623	94.5528	0																52907	158.192	0	47549	142.172	0													14372	42.9723	0				50560	151.174	0
31644	94.6156	0																52952	158.327	0	47623	142.393	0													14377	42.9872	0				50708	151.617	0
31666	94.6813	0																52985	158.425	0	47630	142.414	0													14393	43.0351	1.592e-15				50739	151.71	5.539e-16
31671	94.6963	0																52993	158.449	0	47661	142.506	4.411e-16													14410	43.0859	1.05e-15				50743	151.722	0
31680	94.7232	0																52999	158.467	0	47707	142.644	0													14414	43.0979	5.471e-16				50787	151.853	0
31693	94.7621	0																53060	158.649	0	47723	142.692	0													14433	43.1547	3.987e-16				50789	151.859	0
31718	94.8368	0																53068	158.673	0	47728	142.707	6.668e-16													14452	43.2115	4.102e-16				50795	151.877	0
31719	94.8398	0																53178	159.002	0	47835	143.027	5.653e-16													14462	43.2414	0				50822	151.958	0
31733	94.8817	0																53223	159.137	0	47850	143.071	0													14472	43.2713	0				50902	152.197	0
31750	94.9325	0																53288	159.331	0	47859	143.098	0													14475	43.2803	2.441e-15				50906	152.209	0
31783	95.0312	0																53315	159.412	0	47862	143.107	0													14478	43.2892	0				50981	152.433	0
31792	95.0581	0																53356	159.534	0	47909	143.248	0													14488	43.3191	0				51010	152.52	0
31795	95.067	0																53387	159.627	0	47920	143.281	0													14508	43.3789	0				51039	152.607	0
31800	95.082	0																53443	159.795	0	47952	143.376	0													14525	43.4297	0				51083	152.738	0
31809	95.1089	0																53448	159.81	0	48000	143.52	0													14562	43.5404	7.835e-16				51098	152.783	0
31812	95.1179	0																53475	159.89	0	48032	143.616	0													14567	43.5553	4.152e-16				51138	152.903	0
31816	95.1298	0																53480	159.905	0	48052	143.675	0													14568	43.5583	0				51227	153.169	0
31835	95.1867	0																53525	160.04	0	48056	143.687	0													14579	43.5912	0				51234	153.19	0
31870	95.2913	0																53541	160.088	0	48082	143.765	0													14586	43.6121	1.095e-15				51245	153.223	0
31876	95.3092	0																53549	160.112	0	48106	143.837	0													14593	43.6331	0				51277	153.318	0
31883	95.3302	0																53572	160.18	0	48186	144.076	0													14596	43.642	9.483e-16				51286	153.345	0
31885	95.3362	0																53659	160.44	0	48200	144.118	0													14613	43.6929	0				51289	153.354	0
31887	95.3421	0																53760	160.742	0	48204	144.13	0													14635	43.7587	0				51306	153.405	4.682e-15
31892	95.3571	0																53761	160.745	0	48222	144.184	0													14649	43.8005	9.429e-16				51378	153.62	0
31893	95.3601	0																53770	160.772	0	48278	144.351	0													14653	43.8125	0				51424	153.758	0
31903	95.39	0																53779	160.799	0	48280	144.357	0													14672	43.8693	0				51477	153.916	0
31921	95.4438	0																53795	160.847	0	48334	144.519	1.268e-15													14677	43.8842	6.489e-15				51481	153.928	0
31923	95.4498	0																53808	160.886	0	48355	144.581	0													14679	43.8902	0				51492	153.961	0
31951	95.5335	0																53885	161.116	0	48374	144.638	0													14686	43.9111	1.001e-15				51542	154.111	0
31960	95.5604	0																53900	161.161	0	48408	144.74	0													14692	43.9291	0				51579	154.221	0
31978	95.6142	0																53941	161.284	0	48508	145.039	0													14694	43.9351	2.401e-15				51603	154.293	0
31981	95.6232	0																53974	161.382	0	48596	145.302	0													14701	43.956	0				51607	154.305	0
31988	95.6441	0																54009	161.487	1.431e-14	48620	145.374	0													14704	43.965	0				51624	154.356	0
31991	95.6531	0																54012	161.496	0	48658	145.487	0													14712	43.9889	3.89e-16				51657	154.454	0
32016	95.7278	0																54159	161.935	0	48695	145.598	0													14718	44.0068	3.254e-15				51664	154.475	0
32037	95.7906	0																54186	162.016	0	48702	145.619	9.779e-16													14720	44.0128	0				51666	154.481	0
32048	95.8235	0																54191	162.031	0	48751	145.766	0													14721	44.0158	0				51688	154.547	0
32052	95.8355	0																54197	162.049	0	48771	145.825	0													14731	44.0457	0				51709	154.61	0
32079	95.9162	0																54248	162.202	0	48795	145.897	0													14763	44.1414	4.004e-16				51712	154.619	0
32130	96.0687	0																54258	162.231	4.215e-16	48804	145.924	0													14775	44.1773	4.905e-15				51837	154.993	0
32156	96.1464	0																54267	162.258	0	48854	146.073	1.096e-15													14798	44.246	4.189e-16				51857	155.052	0
32159	96.1554	0																54302	162.363	0	48960	146.39	0													14801	44.255	0				51866	155.079	0
32171	96.1913	0																54334	162.459	0	48982	146.456	0													14806	44.2699	0				51912	155.217	0
32176	96.2062	0																54391	162.629	0	48991	146.483	0													14811	44.2849	0				51921	155.244	0
32180	96.2182	0																54404	162.668	0	48995	146.495	0													14845	44.3865	3.477e-14				51924	155.253	0
32201	96.281	0																54439	162.773	0	49024	146.582	0													14852	44.4075	1.382e-15				51933	155.28	0
32220	96.3378	0																54499	162.952	0	49080	146.749	0													14876	44.4792	0				51942	155.307	0
32235	96.3826	0																54505	162.97	0	49094	146.791	0													14890	44.5211	0				51958	155.354	4.998e-16
32250	96.4275	0																54509	162.982	0	49159	146.985	0													14905	44.566	1.198e-15				51978	155.414	0
32258	96.4514	0																54520	163.015	0	49166	147.006	0													14937	44.6616	6.312e-16				52000	155.48	0
32262	96.4634	0																54780	163.792	0	49220	147.168	0													14946	44.6885	0				52089	155.746	0
32297	96.568	1.52e-15																54784	163.804	0	49228	147.192	4.294e-16													14950	44.7005	0				52118	155.833	0
32298	96.571	0																54807	163.873	0	49267	147.308	3.926e-15													14952	44.7065	1.045e-15				52182	156.024	0
32302	96.583	0																54889	164.118	0	49281	147.35	0													14954	44.7125	6.346e-15				52335	156.482	0
32305	96.5919	0																54897	164.142	0	49285	147.362	0													14961	44.7334	0				52352	156.532	0
32308	96.6009	0																54937	164.262	0	49382	147.652	0													14969	44.7573	0				52401	156.679	0
32339	96.6936	0																54963	164.339	0	49487	147.966	2.85e-15													14971	44.7633	0				52435	156.781	0
32346	96.7145	0																55126	164.827	0	49503	148.014	0													14977	44.7812	0				52440	156.796	0
32370	96.7863	0																55214	165.09	0	49526	148.083	0													14979	44.7872	3.772e-15				52486	156.933	0
32390	96.8461	0																55222	165.114	0	49538	148.119	0													14982	44.7962	0				52522	157.041	0
32453	97.0345	0																55297	165.338	0	49540	148.125	0													14986	44.8081	0				52562	157.16	0
32463	97.0644	0																55324	165.419	0	49594	148.286	0													14993	44.8291	9.524e-16				52610	157.304	0
32477	97.1062	0																55336	165.455	0	49653	148.463	0													14999	44.847	0				52627	157.355	0
32500	97.175	0																55354	165.508	0	49722	148.669	7.139e-16													15024	44.9218	1.13e-15				52657	157.444	0
32513	97.2139	0																55357	165.517	0	49787	148.863	0													15025	44.9248	0				52690	157.543	0
32518	97.2288	0																55360	165.526	0	49846	149.04	0													15034	44.9517	1.097e-15				52758	157.746	0
32535	97.2797	0																55363	165.535	0	49877	149.132	0													15045	44.9845	9.635e-16				52799	157.869	0
32540	97.2946	0																55377	165.577	0	49888	149.165	0													15054	45.0115	0				52813	157.911	0
32584	97.4262	0																55382	165.592	0	49923	149.27	0													15059	45.0264	0				52822	157.938	0
32595	97.4591	0																55418	165.7	0	49931	149.294	0													15066	45.0473	1.81e-15				52855	158.036	0
32599	97.471	0																55440	165.766	0	49940	149.321	0													15069	45.0563	2.064e-15				52865	158.066	0
32601	97.477	0																55445	165.781	0	49952	149.357	0													15084	45.1012	0				52897	158.162	0
32610	97.5039	0																55448	165.79	0	50003	149.509	0													15087	45.1101	0				52909	158.198	0
32650	97.6235	0																55458	165.819	0	50019	149.557	0													15093	45.1281	4.256e-16				52921	158.234	0
32676	97.7012	0																55485	165.9	0	50051	149.653	3.089e-15													15108	45.1729	2.967e-15				52956	158.338	0
32718	97.8268	0																55487	165.906	0	50086	149.757	8.294e-16													15123	45.2178	6.328e-16				52967	158.371	0
32752	97.9285	0																55520	166.005	0	50088	149.763	0													15147	45.2895	3.227e-15				52990	158.44	0
32776	98.0002	0																55524	166.017	0	50161	149.981	0													15157	45.3194	0				53086	158.727	0
32783	98.0212	0																55526	166.023	0	50176	150.026	2.359e-15													15170	45.3583	1.309e-15				53103	158.778	0
32823	98.1408	0																55549	166.091	0	50222	150.164	2.273e-15													15171	45.3613	0				53108	158.793	0
32836	98.1796	0																55581	166.187	0	50265	150.292	0													15175	45.3732	4.347e-16				53112	158.805	0
32847	98.2125	0																55588	166.208	0	50273	150.316	0													15181	45.3912	2.371e-14				53170	158.978	0
32869	98.2783	0																55609	166.271	0	50278	150.331	0													15195	45.4331	4.404e-16				53224	159.14	0
32885	98.3261	0																55621	166.307	0	50307	150.418	0													15199	45.445	0				53324	159.439	0
32909	98.3979	0																55629	166.331	0	50311	150.43	0													15207	45.4689	0				53333	159.466	0
32913	98.4099	0																55666	166.441	0	50342	150.523	0													15213	45.4869	1.128e-15				53340	159.487	0
32918	98.4248	0																55759	166.719	0	50345	150.532	0													15244	45.5796	0				53467	159.866	0
32929	98.4577	0																55760	166.722	0	50362	150.582	0													15248	45.5915	6.752e-16				53470	159.875	0
32934	98.4727	0																55799	166.839	0	50381	150.639	0													15250	45.5975	5.935e-16				53581	160.207	0
32938	98.4846	0																55825	166.917	0	50470	150.905	0													15261	45.6304	8.918e-16				53723	160.632	0
32940	98.4906	0																55850	166.992	0	50494	150.977	1.106e-15													15276	45.6752	0				53778	160.796	0
32941	98.4936	1.157e-15																55882	167.087	0	50495	150.98	0													15282	45.6932	2.551e-14				53802	160.868	0
32959	98.5474	0																55925	167.216	0	50515	151.04	0													15286	45.7051	0				53822	160.928	0
32966	98.5683	0																55933	167.24	0	50549	151.142	0													15293	45.7261	0				53855	161.026	0
32987	98.6311	0																55953	167.299	0	50616	151.342	0													15302	45.753	0				53870	161.071	0
32994	98.6521	0																55980	167.38	0	50628	151.378	0													15305	45.7619	0				53892	161.137	4.101e-16
33005	98.685	0																55987	167.401	0	50640	151.414	0													15309	45.7739	1.693e-15				53898	161.155	0
33034	98.7717	0																55989	167.407	0	50685	151.548	1.404e-15													15311	45.7799	0				53901	161.164	0
33056	98.8374	0																56002	167.446	0	50708	151.617	0													15347	45.8875	0				53904	161.173	0
33062	98.8554	0																56005	167.455	0	50728	151.677	0													15351	45.8995	0				53990	161.43	0
33105	98.984	0																56010	167.47	0	50731	151.686	0													15356	45.9144	0				54019	161.517	0
33128	99.0527	0																56068	167.643	0	50736	151.701	0													15364	45.9384	0				54032	161.556	0
33147	99.1095	0																56071	167.652	0	50827	151.973	0													15380	45.9862	0				54108	161.783	0
33150	99.1185	0																56264	168.229	0	50886	152.149	0													15385	46.0012	0				54116	161.807	0
33152	99.1245	0																56278	168.271	0	50892	152.167	9.189e-16													15388	46.0101	0				54184	162.01	0
33157	99.1394	0																56307	168.358	0	51020	152.55	0													15393	46.0251	7.684e-16				54239	162.175	0
33173	99.1873	0																56320	168.397	0	51036	152.598	3.949e-16													15396	46.034	8.094e-16				54266	162.255	0
33198	99.262	0																56345	168.472	0	51043	152.619	0													15402	46.052	0				54461	162.838	0
33203	99.277	0																56366	168.534	0	51062	152.675	0													15446	46.1835	0				54507	162.976	0
33211	99.3009	0																56388	168.6	0	51124	152.861	8.802e-16													15460	46.2254	0				54535	163.06	8.252e-16
33242	99.3936	0																56409	168.663	0	51190	153.058	0													15465	46.2403	0				54538	163.069	0
33260	99.4474	0																56425	168.711	0	51207	153.109	0													15479	46.2822	1.056e-15				54544	163.087	0
33292	99.5431	0																56435	168.741	0	51221	153.151	9.956e-16													15481	46.2882	2.602e-15				54599	163.251	0
33304	99.579	0																56454	168.798	0	51243	153.217	0													15485	46.3002	0				54604	163.266	0
33327	99.6477	0																56464	168.827	0	51249	153.234	0													15490	46.3151	8.844e-16				54629	163.341	0
33351	99.7195	0																56483	168.884	0	51302	153.393	1.328e-15													15493	46.3241	0				54646	163.392	0
33353	99.7255	0																56515	168.98	0	51342	153.513	6e-16													15495	46.33	0				54649	163.4	0
33358	99.7404	0																56553	169.094	0	51357	153.557	0													15501	46.348	3.954e-16				54668	163.457	0
33365	99.7614	0																56566	169.132	0	51393	153.665	0													15504	46.357	0				54705	163.568	0
33380	99.8062	0																56598	169.228	0	51423	153.755	0													15509	46.3719	5.061e-15				54742	163.679	0
33432	99.9617	0																56649	169.381	0	51456	153.853	0													15515	46.3899	0				54823	163.921	0
33442	99.9916	0																56666	169.431	0	51479	153.922	0													15519	46.4018	6.835e-15				54852	164.007	0
33459	100.042	0																56675	169.458	0	51548	154.129	0													15522	46.4108	0				54945	164.286	0
33465	100.06	0																56696	169.521	0	51553	154.143	0													15527	46.4257	2.193e-15				54954	164.312	0
33488	100.129	0																56753	169.691	6.63e-16	51679	154.52	0													15541	46.4676	0				55006	164.468	0
33489	100.132	0																56770	169.742	0	51689	154.55	8.089e-16													15549	46.4915	3.86e-16				55021	164.513	0
33500	100.165	0																56822	169.898	0	51719	154.64	0													15565	46.5393	0				55048	164.594	0
33538	100.279	0																56833	169.931	0	51757	154.753	0													15572	46.5603	5.265e-16				55111	164.782	0
33572	100.38	0																56858	170.005	0	51775	154.807	0													15586	46.6021	1.107e-15				55114	164.791	0
33583	100.413	0																56884	170.083	0	51776	154.81	5.775e-16													15601	46.647	0				55116	164.797	0
33617	100.515	0																56895	170.116	0	51840	155.002	1.384e-15													15604	46.656	4.187e-15				55127	164.83	0
33666	100.661	0																57006	170.448	0	51886	155.139	0													15606	46.6619	0				55144	164.881	0
33671	100.676	0																57015	170.475	0	51908	155.205	0													15607	46.6649	0				55183	164.997	0
33690	100.733	0																57045	170.565	0	51913	155.22	0													15610	46.6739	1.867e-15				55200	165.048	0
33693	100.742	0																57122	170.795	0	51941	155.304	4.245e-16													15612	46.6799	3.812e-16				55213	165.087	0
33706	100.781	0																57131	170.822	0	51987	155.441	0													15617	46.6948	0				55255	165.212	0
33722	100.829	0																57225	171.103	0	52009	155.507	1.859e-15													15647	46.7845	0				55262	165.233	0
33734	100.865	0																57257	171.198	0	52060	155.659	0													15649	46.7905	0				55268	165.251	0
33741	100.886	0																57279	171.264	0	52126	155.857	0													15663	46.8324	6.917e-16				55303	165.356	0
33756	100.93	0																57419	171.683	0	52234	156.18	0													15672	46.8593	4.115e-16				55339	165.464	0
33764	100.954	0																57437	171.737	0	52291	156.35	0													15684	46.8952	0				55405	165.661	0
33774	100.984	0																57469	171.832	0	52325	156.452	4.567e-16													15688	46.9071	1.421e-15				55498	165.939	0
33821	101.125	0																57473	171.844	0	52364	156.568	0													15696	46.931	0				55512	165.981	5.723e-16
33824	101.134	0																57489	171.892	0	52414	156.718	0													15715	46.9879	2.685e-15				55542	166.071	0
33862	101.247	0																57507	171.946	0	52464	156.867	0													15720	47.0028	0				55550	166.095	0
33869	101.268	0																57520	171.985	0	52472	156.891	0													15724	47.0148	0				55566	166.142	0
33899	101.358	0																57565	172.119	0	52475	156.9	0													15730	47.0327	9.487e-16				55575	166.169	0
33905	101.376	0																57569	172.131	0	52487	156.936	7.029e-16													15736	47.0506	3.913e-16				55607	166.265	0
33934	101.463	0																57644	172.356	0	52494	156.957	0													15738	47.0566	0				55664	166.435	1.24e-15
33940	101.481	0																57778	172.756	0	52503	156.984	4.281e-16													15746	47.0805	0				55705	166.558	0
33953	101.519	0																57806	172.84	0	52527	157.056	0													15785	47.1972	0				55721	166.606	0
33965	101.555	0																57836	172.93	0	52572	157.19	5.801e-16													15795	47.227	0				55733	166.642	0
33972	101.576	0																57844	172.954	0	52579	157.211	0													15810	47.2719	0				55762	166.728	0
33977	101.591	0																57892	173.097	0	52607	157.295	3.42e-15													15812	47.2779	0				55767	166.743	0
33980	101.6	0																57901	173.124	0	52627	157.355	0													15814	47.2839	0				55775	166.767	0
33986	101.618	0																57995	173.405	0	52689	157.54	0													15817	47.2928	1.551e-15				55796	166.83	0
34009	101.687	0																58020	173.48	0	52699	157.57	0													15825	47.3167	0				55801	166.845	0
34027	101.741	0																58031	173.513	0	52778	157.806	0													15835	47.3467	0				55808	166.866	0
34036	101.768	0																58041	173.543	0	52793	157.851	0													15836	47.3496	8.639e-16				55855	167.006	0
34101	101.962	0																58083	173.668	0	52854	158.034	0													15855	47.4064	5.049e-15				55858	167.015	0
34102	101.965	0																58105	173.734	1.589e-15	52864	158.063	0													15871	47.4543	8.491e-16				55895	167.126	0
34118	102.013	0																58146	173.857	0	52866	158.069	0													15873	47.4603	7.99e-16				55912	167.177	0
34122	102.025	0																58192	173.994	0	52869	158.078	0													15879	47.4782	0				55927	167.222	0
34129	102.046	0																58256	174.185	0	52889	158.138	0													15895	47.526	6.722e-16				55957	167.311	0
34142	102.085	1.134e-15																58275	174.242	0	52906	158.189	0													15916	47.5888	8.619e-16				55992	167.416	0
34166	102.156	0																58319	174.374	0	52925	158.246	0													15926	47.6187	4.815e-16				55997	167.431	1.189e-15
34169	102.165	0																58326	174.395	0	52962	158.356	0													15930	47.6307	0				56039	167.557	0
34181	102.201	0																58368	174.52	0	52976	158.398	0													15944	47.6726	0				56154	167.9	0
34204	102.27	0																58381	174.559	0	52989	158.437	0													15952	47.6965	0				56179	167.975	0
34224	102.33	0																58439	174.733	0	53009	158.497	0													15961	47.7234	0				56190	168.008	0
34250	102.407	0																58469	174.822	0	53010	158.5	0													15963	47.7294	0				56314	168.379	9.53e-16
34253	102.416	0																58477	174.846	0	53028	158.554	0													15971	47.7533	0				56324	168.409	0
34276	102.485	0																58510	174.945	0	53083	158.718	0													15976	47.7682	3.95e-16				56331	168.43	0
34313	102.596	0																58526	174.993	0	53090	158.739	0													15986	47.7981	0				56371	168.549	0
34339	102.674	0																58553	175.073	0	53100	158.769	0													15993	47.8191	3.307e-15				56411	168.669	0
34350	102.707	0																58644	175.346	0	53172	158.984	0													16008	47.8639	0				56430	168.726	0
34369	102.763	0																58672	175.429	0	53173	158.987	1.687e-15													16015	47.8849	0				56435	168.741	0
34393	102.835	0																58675	175.438	0	53214	159.11	0													16024	47.9118	0				56439	168.753	0
34446	102.993	0																58688	175.477	0	53265	159.262	0													16036	47.9476	4.861e-16				56499	168.932	4.639e-16
34453	103.014	0																58693	175.492	0	53297	159.358	0													16041	47.9626	0				56527	169.016	0
34470	103.065	0																58727	175.594	0	53472	159.881	0													16085	48.0941	0				56584	169.186	3.909e-16
34497	103.146	0																58818	175.866	0	53474	159.887	4.687e-15													16092	48.1151	3.304e-15				56593	169.213	0
34504	103.167	0																58821	175.875	0	53516	160.013	0													16100	48.139	0				56632	169.33	0
34519	103.212	0																58866	176.009	0	53617	160.315	0													16119	48.1958	3.808e-16				56702	169.539	0
34558	103.328	0																58878	176.045	0	53657	160.434	0													16133	48.2377	4.622e-16				56756	169.7	0
34595	103.439	0																58949	176.257	0	53704	160.575	1.24e-15													16136	48.2466	0				56761	169.715	0
34596	103.442	0																59063	176.598	0	53749	160.709	0													16137	48.2496	2.038e-15				56849	169.978	9.688e-15
34599	103.451	0																59090	176.679	0	53789	160.829	0													16166	48.3363	6.418e-16				56850	169.982	0
34614	103.496	0																59099	176.706	0	53884	161.113	0													16173	48.3573	0				56866	170.029	0
34616	103.502	0																59116	176.757	0	53914	161.203	4.372e-16													16182	48.3842	8.534e-16				56892	170.107	0
34721	103.816	0																59180	176.948	0	53921	161.224	4.032e-16													16183	48.3872	0				56940	170.251	0
34730	103.843	0																59195	176.993	0	53950	161.31	0													16188	48.4021	0				56970	170.34	0
34796	104.04	0																59249	177.155	0	53963	161.349	0													16200	48.438	6.153e-16				57031	170.523	0
34806	104.07	0																59254	177.169	0	53976	161.388	0													16202	48.444	0				57039	170.547	0
34819	104.109	0																59262	177.193	0	54015	161.505	0													16219	48.4948	0				57042	170.556	0
34834	104.154	0																59270	177.217	0	54019	161.517	0													16235	48.5427	1.259e-15				57063	170.618	0
34856	104.219	0																59331	177.4	0	54052	161.615	0													16256	48.6054	0				57069	170.636	0
34899	104.348	0																59346	177.445	6.787e-16	54060	161.639	0													16278	48.6712	2.89e-15				57081	170.672	0
34926	104.429	0																59369	177.513	0	54074	161.681	0													16281	48.6802	0				57144	170.861	0
34959	104.527	0																59398	177.6	0	54115	161.804	0													16286	48.6951	5.715e-16				57155	170.893	0
35003	104.659	0																59436	177.714	0	54149	161.905	0													16293	48.7161	3.049e-15				57158	170.902	0
35013	104.689	0																59492	177.881	0	54150	161.909	8.627e-16													16303	48.746	0				57175	170.953	0
35039	104.767	0																59539	178.022	0	54162	161.944	0													16309	48.7639	0				57229	171.115	0
35083	104.898	0																59547	178.046	0	54167	161.959	2.099e-15													16311	48.7699	3.815e-16				57283	171.276	0
35093	104.928	0																59561	178.087	0	54172	161.974	0													16333	48.8357	8.588e-16				57305	171.342	0
35105	104.964	0																59573	178.123	0	54274	162.279	0													16354	48.8985	2.562e-15				57354	171.488	0
35107	104.97	0																59608	178.228	0	54282	162.303	0													16361	48.9194	0				57372	171.542	0
35181	105.191	0																59621	178.267	4.729e-16	54296	162.345	1.707e-15													16369	48.9433	1.227e-15				57413	171.665	0
35225	105.323	0																59625	178.279	0	54312	162.393	0													16375	48.9612	0				57419	171.683	0
35246	105.385	0																59635	178.309	0	54318	162.411	0													16378	48.9702	0				57423	171.695	0
35275	105.472	0																59640	178.324	0	54338	162.471	5.975e-16													16387	48.9971	9.63e-16				57442	171.752	0
35277	105.478	0																59667	178.404	0	54376	162.584	0													16393	49.0151	1.419e-15				57459	171.802	0
35290	105.517	0																59668	178.407	6.112e-14	54491	162.928	8.996e-16													16394	49.0181	0				57508	171.949	0
35297	105.538	0																59676	178.431	0	54526	163.033	0													16402	49.042	5.211e-16				57523	171.994	0
35306	105.565	0																59695	178.488	0	54545	163.09	3.236e-15													16406	49.0539	0				57531	172.018	0
35329	105.634	0																59699	178.5	0	54600	163.254	0													16414	49.0779	0				57536	172.033	0
35333	105.646	0																59712	178.539	0	54604	163.266	0													16438	49.1496	6.257e-16				57574	172.146	0
35364	105.738	0																59728	178.587	0	54707	163.574	0													16440	49.1556	0				57611	172.257	0
35377	105.777	0																59739	178.62	4.181e-16	54723	163.622	0													16442	49.1616	6.637e-16				57675	172.448	0
35406	105.864	0																59759	178.679	0	54734	163.655	9.302e-16													16447	49.1765	0				57695	172.508	0
35424	105.918	0																59760	178.682	0	54748	163.696	0													16451	49.1885	0				57705	172.538	0
35447	105.987	0																59792	178.778	0	54853	164.011	0													16455	49.2005	0				57806	172.84	0
35463	106.034	0																59837	178.913	0	54885	164.106	0													16465	49.2304	0				57822	172.888	0
35481	106.088	0																59893	179.08	0	54907	164.172	0													16469	49.2423	0				57824	172.894	0
35490	106.115	0																59904	179.113	0	54928	164.235	1.304e-15													16479	49.2722	9.473e-16				57856	172.989	0
35526	106.223	0																59924	179.173	0	54970	164.36	0													16495	49.3201	0				57870	173.031	0
35542	106.271	0																59933	179.2	0	55046	164.588	4.852e-15													16497	49.326	0				57916	173.169	0
35561	106.327	0																59940	179.221	0	55052	164.606	0													16500	49.335	0				57935	173.226	0
35569	106.351	0																59942	179.227	0	55078	164.683	0													16506	49.3529	0				57937	173.232	0
35577	106.375	0																59946	179.238	0	55093	164.728	0													16510	49.3649	7.824e-16				57961	173.303	0
35606	106.462	0																59960	179.28	0	55099	164.746	0													16516	49.3828	4.148e-16				58004	173.432	0
35614	106.486	0																59991	179.373	0	55112	164.785	0													16523	49.4038	0				58013	173.459	0
35617	106.495	0																60035	179.505	0	55157	164.919	1.722e-15													16541	49.4576	0				58018	173.474	4.267e-16
35630	106.534	0																60059	179.576	0	55197	165.039	0													16545	49.4695	0				58037	173.531	1.249e-15
35650	106.594	0																60061	179.582	0	55207	165.069	5.395e-15													16555	49.4995	1.026e-15				58040	173.54	0
35656	106.611	0																60074	179.621	0	55215	165.093	5.713e-16													16558	49.5084	0				58059	173.596	0
35667	106.644	0																60121	179.762	0	55255	165.212	0													16570	49.5443	0				58074	173.641	0
35681	106.686	0																60145	179.834	0	55280	165.287	0													16581	49.5772	0				58087	173.68	0
35692	106.719	0																60148	179.843	0	55285	165.302	0													16595	49.6191	0				58131	173.812	0
35743	106.872	0																60154	179.861	0	55341	165.47	0													16601	49.637	0				58154	173.881	0
35771	106.955	0																60159	179.875	0	55360	165.526	0													16622	49.6998	6.169e-15				58331	174.41	0
35788	107.006	0																60188	179.962	0	55372	165.562	0													16638	49.7476	4.982e-16				58381	174.559	0
35795	107.027	0																60212	180.034	0	55517	165.996	0													16641	49.7566	1.346e-15				58440	174.736	0
35831	107.135	0																60240	180.118	0	55565	166.139	0													16651	49.7865	1.225e-15				58506	174.933	0
35840	107.162	0																60262	180.183	0	55575	166.169	0													16659	49.8104	0				58564	175.106	0
35845	107.177	0																60276	180.225	0	55588	166.208	1.383e-15													16669	49.8403	0				58567	175.115	0
35861	107.224	0																60337	180.408	0	55668	166.447	6.93e-16													16675	49.8582	0				58598	175.208	0
35864	107.233	0																60349	180.444	0	55727	166.624	0													16676	49.8612	4.118e-15				58670	175.423	0
35871	107.254	0																60359	180.473	0	55761	166.725	0													16680	49.8732	3.725e-15				58698	175.507	0
35881	107.284	0																60392	180.572	0	55786	166.8	0													16693	49.9121	0				58700	175.513	1.091e-15
35899	107.338	0																60395	180.581	0	55830	166.932	9.709e-16													16703	49.942	2.317e-15				58753	175.672	0
35918	107.395	0																			55858	167.015	0													16705	49.9479	4.245e-16				58765	175.707	0
35919	107.398	0																			55889	167.108	0													16715	49.9779	0				58789	175.779	0
35931	107.434	0																			55896	167.129	0													16722	49.9988	0				58814	175.854	0
35934	107.443	0																			55938	167.255	0													16726	50.0107	0				58912	176.147	0
35936	107.449	0																			55943	167.27	0													16739	50.0496	0				58920	176.171	0
35960	107.52	0																			55946	167.279	0													16745	50.0675	0				58926	176.189	0
35977	107.571	0																			55964	167.332	0													16747	50.0735	3.906e-16				58973	176.329	0
35992	107.616	0																			55965	167.335	1.249e-15													16752	50.0885	4.356e-15				58996	176.398	0
36021	107.703	0																			55986	167.398	0													16754	50.0945	0				59066	176.607	0
36038	107.754	0																			56024	167.512	0													16758	50.1064	5.113e-16				59087	176.67	0
36044	107.772	0																			56038	167.554	1.275e-15													16763	50.1214	4.488e-16				59103	176.718	0
36058	107.813	0																			56064	167.631	0													16766	50.1303	0				59120	176.769	0
36064	107.831	0																			56101	167.742	0													16771	50.1453	0				59155	176.873	0
36102	107.945	0																			56102	167.745	0													16774	50.1543	3.701e-16				59212	177.044	0
36119	107.996	0																			56112	167.775	0													16777	50.1632	6.712e-16				59243	177.137	0
36126	108.017	0																			56121	167.802	0													16790	50.2021	0				59286	177.265	0
36134	108.041	0																			56141	167.862	0													16802	50.238	0				59292	177.283	0
36186	108.196	0																			56146	167.876	0													16820	50.2918	0				59315	177.352	0
36192	108.214	0																			56155	167.903	0													16822	50.2978	0				59369	177.513	0
36200	108.238	0																			56179	167.975	0													16844	50.3636	0				59511	177.938	0
36203	108.247	0																			56234	168.14	0													16859	50.4084	0				59521	177.968	0
36274	108.459	0																			56245	168.173	0													16865	50.4263	0				59566	178.102	0
36305	108.552	0																			56252	168.194	0													16881	50.4742	6.586e-16				59584	178.156	0
36326	108.615	0																			56351	168.489	0													16889	50.4981	0				59641	178.327	0
36356	108.704	0																			56682	169.479	0													16890	50.5011	1.078e-14				59649	178.351	0
36398	108.83	0																			56738	169.647	8.747e-16													16894	50.5131	6.832e-16				59672	178.419	0
36419	108.893	0																			56742	169.659	0													16903	50.54	5.17e-16				59718	178.557	0
36429	108.923	0																			56814	169.874	0													16908	50.5549	1.356e-15				59893	179.08	0
36477	109.066	0																			56873	170.05	0													16916	50.5788	0				59922	179.167	0
36536	109.243	0																			56966	170.328	0													16917	50.5818	2.257e-15				59963	179.289	0
36556	109.302	0																			57041	170.553	0													16923	50.5998	5.583e-15				59975	179.325	0
36559	109.311	0																			57047	170.571	0													16924	50.6028	0				59979	179.337	0
36567	109.335	0																			57058	170.603	0													16930	50.6207	0				60015	179.445	0
36578	109.368	0																			57086	170.687	0													16934	50.6327	0				60032	179.496	0
36616	109.482	0																			57156	170.896	0													16946	50.6685	0				60033	179.499	0
36622	109.5	0																			57175	170.953	0													16949	50.6775	3.095e-15				60050	179.549	0
36671	109.646	0																			57186	170.986	5.454e-16													16978	50.7642	0				60069	179.606	0
36711	109.766	0																			57189	170.995	0													16998	50.824	0				60105	179.714	0
36721	109.796	0																			57191	171.001	0													17004	50.842	0				60110	179.729	0
36797	110.023	0																			57205	171.043	0													17011	50.8629	4.459e-15				60191	179.971	0
36803	110.041	0																			57228	171.112	3.836e-16													17017	50.8808	0				60253	180.156	0
36816	110.08	0																			57262	171.213	0													17025	50.9047	0				60263	180.186	0
36846	110.169	0																			57271	171.24	0													17041	50.9526	6.381e-16				60273	180.216	0
36866	110.229	0																			57288	171.291	0													17044	50.9616	0				60283	180.246	0
36896	110.319	0																			57300	171.327	0													17054	50.9915	2.813e-15				60302	180.303	0
36936	110.439	0																			57305	171.342	0													17061	51.0124	9.846e-16				60320	180.357	0
36955	110.496	0																			57344	171.459	0													17063	51.0184	0				60338	180.411	0
36989	110.597	0																			57364	171.518	0													17068	51.0333	0				60383	180.545	0
36992	110.606	0																			57367	171.527	8.333e-16													17070	51.0393	0
37073	110.848	0																			57376	171.554	0													17079	51.0662	2.697e-15
37161	111.111	0																			57388	171.59	0													17086	51.0871	0
37162	111.114	0																			57434	171.728	0													17094	51.1111	9.893e-16
37170	111.138	0																			57446	171.763	0													17112	51.1649	1.362e-15
37188	111.192	0																			57452	171.781	0													17121	51.1918	1.64e-15
37209	111.255	0																			57468	171.829	4.327e-16													17131	51.2217	0
37211	111.261	0																			57516	171.973	0													17151	51.2815	0
37278	111.461	0																			57533	172.024	0													17155	51.2934	2.237e-15
37282	111.473	0																			57538	172.039	0													17161	51.3114	0
37297	111.518	0																			57541	172.048	0													17163	51.3174	0
37308	111.551	0																			57598	172.218	0													17168	51.3323	0
37328	111.611	0																			57737	172.634	1.133e-15													17182	51.3742	0
37373	111.745	0																			57743	172.652	0													17194	51.4101	0
37378	111.76	0																			57809	172.849	0													17200	51.428	0
37419	111.883	0																			57850	172.971	0													17210	51.4579	6.909e-16
37505	112.14	0																			57876	173.049	0													17212	51.4639	3e-15
37534	112.227	0																			57963	173.309	0													17222	51.4938	0
37553	112.284	0																			57989	173.387	0													17223	51.4968	5.093e-16
37565	112.319	0																			58036	173.528	0													17225	51.5027	0
37633	112.523	0																			58056	173.587	0													17229	51.5147	5.16e-16
37639	112.541	0																			58062	173.605	0													17232	51.5237	0
37642	112.55	0																			58111	173.752	4.012e-16													17235	51.5327	3.266e-15
37650	112.573	0																			58137	173.83	0													17239	51.5446	9.466e-16
37675	112.648	0																			58147	173.859	1.044e-15													17244	51.5596	0
37696	112.711	0																			58158	173.892	0													17245	51.5626	2.859e-15
37701	112.726	0																			58173	173.937	0													17250	51.5775	5.544e-16
37725	112.798	0																			58201	174.021	0													17276	51.6552	1.354e-15
37730	112.813	0																			58214	174.06	0													17282	51.6732	0
37732	112.819	0																			58246	174.155	0													17301	51.73	0
37773	112.941	0																			58251	174.171	0													17313	51.7659	0
37778	112.956	0																			58257	174.188	0													17315	51.7719	0
37794	113.004	0																			58356	174.484	0													17317	51.7778	5.372e-16
37831	113.115	0																			58390	174.586	0													17331	51.8197	4.797e-16
37851	113.174	0																			58419	174.673	0													17349	51.8735	0
37868	113.225	0																			58452	174.772	0													17357	51.8974	0
37910	113.351	0																			58480	174.855	4.036e-15													17376	51.9542	0
37930	113.411	0																			58521	174.978	0													17446	52.1635	1.259e-15
37937	113.432	0																			58544	175.047	0													17450	52.1755	7.881e-16
37979	113.557	0																			58546	175.053	0													17451	52.1785	0
38009	113.647	0																			58573	175.133	0													17454	52.1875	0
38040	113.74	0																			58576	175.142	0													17462	52.2114	7.807e-16
38080	113.859	0																			58581	175.157	0													17486	52.2831	0
38100	113.919	0																			58587	175.175	0													17497	52.316	4.871e-16
38109	113.946	0																			58616	175.262	5.653e-16													17500	52.325	0
38118	113.973	0																			58662	175.399	0													17503	52.334	1.47e-15
38192	114.194	0																			58789	175.779	0													17506	52.3429	0
38199	114.215	0																			58840	175.932	1.845e-15													17523	52.3938	2.133e-15
38215	114.263	0																			58879	176.048	7.641e-16													17527	52.4057	4.047e-16
38261	114.4	0																			58929	176.198	1.39e-15													17530	52.4147	0
38283	114.466	0																			59032	176.506	0													17535	52.4297	0
38325	114.592	0																			59159	176.885	4.503e-16													17552	52.4805	0
[truncated: 4,836 more rows]
[truncated: 346 more columns]
